# Supplementary material for: Towards natural mimetics of metformin and rapamycin
Source: Aging (Albany NY). 2017 Nov 15;9(11):2245–68. doi: 10.18632/aging.101319 (PMC5723685; doi:10.18632/aging.101319)
Supplement: Supplementary file 1 [file aging-09-2245-s001.xlsx]

## Sheet: DL_metf_significance_final.txt
Natural compound	# of sifnificant samples (>0.5)	total # of samples	p-value	q-value	odds ratio
metformin	146	222	3.87304e-177	1.67656e-173	60.0591
allantoin	127	142	5.24171e-166	1.13451e-162	79.5868
geldanamycin	7	3153	7.84521e-11	1.13201e-07	0.163489
ketocholesterol	9	22	1.47107e-10	1.54837e-07	31.6307
glucosamine	9	23	2.02326e-10	1.54837e-07	30.2557
troglitazone	32	621	2.14615e-10	1.54837e-07	4.05768
deoxycholic-acid	14	136	1.11897e-08	6.91971e-06	7.99596
butyrolactone	7	22	7.02249e-08	3.2674e-05	24.5551
ellagic-acid	7	22	7.02249e-08	3.2674e-05	24.5551
z-guggulsterone	7	23	9.05769e-08	3.2674e-05	23.4998
spermidine	7	23	9.05769e-08	3.2674e-05	23.4998
cardamonin	7	23	9.05769e-08	3.2674e-05	23.4998
taurocholic-acid	10	89	6.65352e-07	0.000221551	8.69283
carnosol	6	23	1.6598e-06	0.000478995	20.1087
anacardic-acid	6	23	1.6598e-06	0.000478995	20.1087
sirolimus	2	1483	1.86101e-06	0.000503494	0.101306
phenylbutyrate	8	68	6.41188e-06	0.00163269	9.08461
flavanone	8	76	1.35429e-05	0.00311984	8.12766
lithocholic-acid	9	101	1.36936e-05	0.00311984	6.88524
glycocholic-acid	9	106	1.95885e-05	0.00423973	6.56035
nicotinamide	8	81	2.07357e-05	0.00427431	7.62593
gallic-acid	5	22	2.24072e-05	0.00432702	17.501
licochalcone-a	5	23	2.6989e-05	0.00432702	16.7406
anandamide	5	23	2.6989e-05	0.00432702	16.7406
vanillyl-glycol	5	23	2.6989e-05	0.00432702	16.7406
trehalose	5	23	2.6989e-05	0.00432702	16.7406
acadesine	7	60	2.55951e-05	0.00432702	9.002
epoxycholesterol	8	89	3.87707e-05	0.00578724	6.93854
androstenedione	8	89	3.87707e-05	0.00578724	6.93854
BRD-K65411918	8	90	4.17438e-05	0.00602334	6.86166
icosapent	7	76	0.000102292	0.0138375	7.10236
paxilline	7	76	0.000102292	0.0138375	7.10236
retinol	10	170	0.00012829	0.0168285	4.54637
doconexent	8	108	0.000137623	0.0175218	5.71684
C2-dihydroceramide	4	21	0.000279166	0.0345272	14.6557
dihydrocapsaicin	4	22	0.000326568	0.0392679	13.9911
harmine	4	23	0.000379466	0.0421187	13.377
PMSF	4	23	0.000379466	0.0421187	13.377
BRD-A32582647	4	23	0.000379466	0.0421187	13.377
BRD-K42823101	4	24	0.000438212	0.0462665	12.8197
BRD-K74773935	4	24	0.000438212	0.0462665	12.8197
bafilomycin	5	46	0.000505256	0.052075	8.36778
estradiol	3	1082	0.00093141	0.0937646	0.209773
HO-013	6	85	0.00118545	0.116626	5.43804
pioglitazone	8	153	0.00122836	0.118163	4.03287
pterostilbene	5	60	0.00153251	0.137995	6.41402
cholic-acid	6	90	0.00156204	0.137995	5.13414
BL-077	6	90	0.00156204	0.137995	5.13414
taurodeoxycholic-acid	6	90	0.00156204	0.137995	5.13414
trichostatin-a	28	3697	0.00167193	0.144748	0.566536
dinoprostone	6	95	0.00202333	0.171736	4.86424
pregnenolone	6	102	0.00283324	0.235856	4.53025
glycodeoxycholic-acid	7	143	0.00346354	0.282886	3.77193
geranyl-geranyl-pyrophosphate	3	23	0.00444427	0.356265	10.0233
BRD-K59946561	5	86	0.00656971	0.517071	4.47346
retinyl	5	87	0.00687518	0.53145	4.42193
farnesol	5	88	0.00719044	0.546069	4.3716
3,3'-diindolylmethane	6	126	0.00749512	0.559393	3.66622
hydroxycholesterol	5	90	0.00785094	0.576018	4.27426
resveratrol	16	636	0.0135866	0.980228	1.94427
BRD-K65981456	2	23	0.0409127	1	6.67387
BRD-K13195996	2	24	0.0439517	1	6.39568
BRD-A26347577	2	24	0.0439517	1	6.39568
5-hydroxytryptophan	2	24	0.0439517	1	6.39568
methyltyramine	2	24	0.0439517	1	6.39568
norepinephrine	4	69	0.0147846	1	4.45655
octopamine	2	35	0.0821783	1	4.38511
plumbagin	1	18	0.218421	1	4.25951
gingerol	4	75	0.0192232	1	4.09991
geranylgeraniol	4	87	0.0303529	1	3.5334
androstenol	4	88	0.03142	1	3.49334
farnesylpyrophosphate	1	22	0.257944	1	3.4849
BRD-K97808269	1	23	0.267508	1	3.33333
1,2,3,4-tetrahydroisoquinoline	1	23	0.267508	1	3.33333
caffeine	5	116	0.0205721	1	3.31502
BRD-A52530852	1	24	0.27695	1	3.19438
hydroxytyrosol	1	24	0.27695	1	3.19438
isosalsoline	1	24	0.27695	1	3.19438
salsoline	1	24	0.27695	1	3.19438
BRD-A79058669	1	24	0.27695	1	3.19438
BRD-K19653414	1	24	0.27695	1	3.19438
BRD-K63116520	1	24	0.27695	1	3.19438
BRD-K95847244	1	24	0.27695	1	3.19438
anisomycin	3	79	0.0896926	1	2.91555
chenodeoxycholic-acid	3	99	0.145028	1	2.3259
progesterone	5	187	0.10378	1	2.05428
rosiglitazone	9	346	0.0521745	1	2.00288
valproic-acid	11	427	0.0316128	1	1.98572
apigenin	4	156	0.152819	1	1.96868
forskolin	10	398	0.0455474	1	1.93537
quinidine	5	205	0.201786	1	1.87345
capsaicin	5	227	0.230657	1	1.6913
avicin-g	11	538	0.128518	1	1.57343
estrone	8	436	0.290662	1	1.40933
avicin-d	12	688	0.30836	1	1.3408
chloroquine	5	401	1	1	0.954974
kavain	1	85	1	1	0.901175
curcumin	11	1010	0.674193	1	0.832282
epigallocatechin	3	300	1	1	0.765302
salsolinol	1	107	1	1	0.715657
tert-butylhydroquinone	8	892	0.369893	1	0.684236
rotenone	2	230	0.774119	1	0.665417
sulforaphane	10	1195	0.1952	1	0.636996
tamoxifen	6	964	0.0616002	1	0.473266
genistein	7	1135	0.0452766	1	0.468292
simvastatin	2	374	0.251658	1	0.408319
piceatannol	1	214	0.534758	1	0.357288
pravastatin	1	265	0.272739	1	0.28831
lovastatin	1	367	0.09957	1	0.207867
radicicol	0	0	1	1	0
BRD-A15501135	0	0	1	1	0
BRD-K85565420	0	0	1	1	0
BRD-A35769934	0	0	1	1	0
BRD-A37501891	0	0	1	1	0
doxorubicin	0	0	1	1	0
ingenol	0	0	1	1	0
cerulenin	0	0	1	1	0
daunorubicin	0	0	1	1	0
thapsigargin	0	0	1	1	0
BRD-K85853281	0	0	1	1	0
chaetocin	0	0	1	1	0
withaferin-a	0	0	1	1	0
menadione	0	0	1	1	0
A-23187	0	0	1	1	0
phenethyl-isothiocyanate	0	0	1	1	0
thiostrepton	0	0	1	1	0
idarubicin	0	0	1	1	0
piperlongumine	0	0	1	1	0
prostaglandin-a1	0	0	1	1	0
parthenolide	0	0	1	1	0
butein	0	0	1	1	0
wortmannin	0	0	1	1	0
triptolide	0	0	1	1	0
brazilin	0	0	1	1	0
4-hydroxy-2-nonenal	0	0	1	1	0
staurosporine	0	0	1	1	0
cyclosporin-a	0	0	1	1	0
flavokavain-b	0	0	1	1	0
phloretin	0	0	1	1	0
celastrol	0	0	1	1	0
docosatrienoic-acid	0	0	1	1	0
homoharringtonine	0	0	1	1	0
isoliquiritigenin	0	0	1	1	0
alpha-estradiol	0	0	1	1	0
disulfiram	0	0	1	1	0
latrunculin-b	0	0	1	1	0
brefeldin-a	0	0	1	1	0
epirubicin	0	0	1	1	0
mycophenolic-acid	0	0	1	1	0
phorbol-myristate-acetate	0	0	1	1	0
narciclasine	0	0	1	1	0
oligomycin-a	0	0	1	1	0
puromycin	0	0	1	1	0
tretinoin	0	0	1	1	0
cytosporone-b	0	0	1	1	0
rottlerin	0	0	1	1	0
clomifene	0	0	1	1	0
pidorubicine	0	0	1	1	0
gossypol	0	0	1	1	0
estriol	0	0	1	1	0
paroxetine	0	0	1	1	0
cytochalasin-b	0	0	1	1	0
mevastatin	0	0	1	1	0
scopolamine	0	0	1	1	0
ellipticine	0	0	1	1	0
diphencyprone	0	0	1	1	0
tubocurarine	0	0	1	1	0
galantamine	0	0	1	1	0
hyperoside	0	0	1	1	0
ivermectin	0	0	1	1	0
NU-1025	0	0	1	1	0
emetine	0	0	1	1	0
cantharidin	0	0	1	1	0
gelsemine	0	0	1	1	0
prostratin	0	0	1	1	0
BRD-A14178283	0	0	1	1	0
evodiamine	0	0	1	1	0
BRD-A04172077	0	0	1	1	0
caffeic-acid-phenethyl-ester	0	0	1	1	0
bufalin	0	0	1	1	0
marmesin	0	0	1	1	0
antimycin-a	0	0	1	1	0
cycloheximide	0	0	1	1	0
xanthohumol	0	0	1	1	0
penitrem-a	0	0	1	1	0
BRD-K84924563	0	0	1	1	0
taxifolin	0	0	1	1	0
BRD-K07476834	0	0	1	1	0
deltaline	0	0	1	1	0
cisapride	0	0	1	1	0
fumonisin-b1	0	0	1	1	0
ungerine	0	0	1	1	0
papaverine	0	0	1	1	0
diethylstilbestrol	0	0	1	1	0
emodic-acid	0	0	1	1	0
BRD-K59460069	0	0	1	1	0
luteolin	0	0	1	1	0
hydrocortisone	0	0	1	1	0
gamma-linolenic-acid	0	0	1	1	0
esculin	0	0	1	1	0
sphingosine	0	0	1	1	0
epicatechin	0	0	1	1	0
tacrolimus	0	0	1	1	0
guggulsterone	0	0	1	1	0
tangeritin	0	0	1	1	0
equol	0	0	1	1	0
capecitabine	0	0	1	1	0
ursolic-acid	0	0	1	1	0
5-methoxytryptamine	0	0	1	1	0
AICA-ribonucleotide	0	0	1	1	0
rhamnetin	0	0	1	1	0
isoquercetin	0	0	1	1	0
prunetin	0	0	1	1	0
hippeastrine	0	0	1	1	0
deguelin	0	0	1	1	0
testosterone	0	0	1	1	0
chelidonine	0	0	1	1	0
diethyltoluamide	0	0	1	1	0
pseudopelletierine	0	0	1	1	0
methoxsalen	0	0	1	1	0
lomatin	0	0	1	1	0
BRD-K46836114	0	0	1	1	0
ciprofibrate	0	0	1	1	0
methylnorlichexanthone	0	0	1	1	0
arctigenin	0	0	1	1	0
rhodomyrtoxin-b	0	0	1	1	0
eugenitol	0	0	1	1	0
AVA	0	0	1	1	0
alpha-linolenic-acid	0	0	1	1	0
procyclidine	0	0	1	1	0
androsta-1,4-dien-3,17-dione	0	0	1	1	0
BRD-K97951054	0	0	1	1	0
equilin	0	0	1	1	0
hydroquinidine	0	0	1	1	0
caffeic-acid	0	0	1	1	0
camptothecin	0	0	1	1	0
endecaphyllin-x	0	0	1	1	0
kawain	0	0	1	1	0
daidzein	0	0	1	1	0
BRD-A98888159	0	0	1	1	0
Gossypetin	0	0	1	1	0
nobiletin	0	0	1	1	0
nitrarine	0	0	1	1	0
noscapine	0	0	1	1	0
hinokitiol	0	0	1	1	0
prostaglandin	0	0	1	1	0
estradiol-cypionate	0	0	1	1	0
eicosadienoic-acid	0	0	1	1	0
tramadol	0	0	1	1	0
rathyronine	0	0	1	1	0
coumaric-acid	0	0	1	1	0
tremulacin	0	0	1	1	0
oligomycin-c	0	0	1	1	0
desoxypeganine	0	0	1	1	0
ochratoxin-a	0	0	1	1	0
benzo(a)pyrene	0	0	1	1	0
palmitoylethanolamide	0	0	1	1	0
umbelliferone	0	0	1	1	0
benzydamine	0	0	1	1	0
butylparaben	0	0	1	1	0
delcorine	0	0	1	1	0
ergocryptine	0	0	1	1	0
BRD-K73700643	0	0	1	1	0
coumestrol	0	0	1	1	0
toremifene	0	0	1	1	0
podophyllotoxin	0	0	1	1	0
hydrastine	0	0	1	1	0
nelfinavir	0	0	1	1	0
donepezil	0	0	1	1	0
1-methylisoquinoline	0	0	1	1	0
noreleagnine	0	0	1	1	0
ergometrine	0	0	1	1	0
dantron	0	0	1	1	0
myriocin	0	0	1	1	0
digitoxin	0	0	1	1	0
securinine	0	0	1	1	0
periplocymarin	0	0	1	1	0
ouabain	0	0	1	1	0
acarbose	0	0	1	1	0
pinocembrin	0	0	1	1	0
BRD-A30395175	0	0	1	1	0
honokiol	0	0	1	1	0
sappanone-a	0	0	1	1	0
physostigmine	0	0	1	1	0
laudanosine	0	0	1	1	0
cinchonine	0	0	1	1	0
ginsenoside	0	0	1	1	0
dehydrocholic-acid	0	0	1	1	0
GR-235	0	0	1	1	0
damnacanthal	0	0	1	1	0
SAL-1	0	0	1	1	0
lasalocid	0	0	1	1	0
dihydroergocristine	0	0	1	1	0
herniarin	0	0	1	1	0
tetrahydrocannabinol-7-oic-acid	0	0	1	1	0
heliomycin	0	0	1	1	0
cortisone	0	0	1	1	0
penicillic-acid	0	0	1	1	0
efavirenz	0	0	1	1	0
imperatorin	0	0	1	1	0
mocimycin	0	0	1	1	0
ritonavir	0	0	1	1	0
dopamine	0	0	1	1	0
naproxen	0	0	1	1	0
lobaric-acid	0	0	1	1	0
phenacetin	0	0	1	1	0
harpagoside	0	0	1	1	0
fisetinidol	0	0	1	1	0
erbstatin-analog	0	0	1	1	0
strophanthidin	0	0	1	1	0
heliotrine	0	0	1	1	0
myricetin	0	0	1	1	0
benzethonium	0	0	1	1	0
scoulerine	0	0	1	1	0
maackiain	0	0	1	1	0
BRD-A95820578	0	0	1	1	0
salvinorin-a	0	0	1	1	0
boldine	0	0	1	1	0
karakoline	0	0	1	1	0
betulinic-acid	0	0	1	1	0
isoreserpine	0	0	1	1	0
lupanine	0	0	1	1	0
helveticoside	0	0	1	1	0
BRD-A62200266	0	0	1	1	0
dehydroisoandosterone	0	0	1	1	0
etoposide	0	0	1	1	0
foliosidine	0	0	1	1	0
racephedrine	0	0	1	1	0
methyl-2,5-dihydroxycinnamate	0	0	1	1	0
scandenin	0	0	1	1	0
BRD-A84066268	0	0	1	1	0
epibatidine	0	0	1	1	0
rotenonic-acid	0	0	1	1	0
erythromycin	0	0	1	1	0
paclitaxel	0	0	1	1	0
leucodin	0	0	1	1	0
reserpine	0	0	1	1	0
phylloquinone	0	0	1	1	0
auraptene	0	0	1	1	0
sinensetin	0	0	1	1	0
eugenol	0	0	1	1	0
depudecin	0	0	1	1	0
veratridine	0	0	1	1	0
catechin	0	0	1	1	0
BRD-K49061529	0	0	1	1	0
psoromic-acid	0	0	1	1	0
skatole	0	0	1	1	0
bicuculline	0	0	1	1	0
ryanodine	0	0	1	1	0
nicotinyl-alcohol-tartrate	0	0	1	1	0
indirubin	0	0	1	1	0
lavendustin-a	0	0	1	1	0
estradiol-benzoate	0	0	1	1	0
prostaglandin-e1	0	0	1	1	0
ephedrine	0	0	1	1	0
ergocornine	0	0	1	1	0
estropipate	0	0	1	1	0
sulfasalazine	0	0	1	1	0
eriodictyol	0	0	1	1	0
lysergol	0	0	1	1	0
anabasine	0	0	1	1	0
tetramethylsilane	0	0	1	1	0
lanatoside-c	0	0	1	1	0
naringin	0	0	1	1	0
cephaeline	0	0	1	1	0
ebelactone-b	0	0	1	1	0
salicin	0	0	1	1	0
buddleoflavonoloside	0	0	1	1	0
kaempferol	0	0	1	1	0
ropinirole	0	0	1	1	0
hyoscyamine	0	0	1	1	0
prostaglandin-b2	0	0	1	1	0
fraxetin	0	0	1	1	0
asiaticoside	0	0	1	1	0
valyltryptophan	0	0	1	1	0
alfadolone	0	0	1	1	0
theophylline	0	0	1	1	0
yohimbine	0	0	1	1	0
dicoumarol	0	0	1	1	0
aristolochic-acid	0	0	1	1	0
BRD-K52640952	0	0	1	1	0
nicotine	0	0	1	1	0
napelline	0	0	1	1	0
pentobarbital	0	0	1	1	0
6-hydroxytropinone	0	0	1	1	0
rosmarinic-acid	0	0	1	1	0
fraxidin	0	0	1	1	0
rescinnamine	0	0	1	1	0
ethinyl-estradiol	0	0	1	1	0
digoxin	0	0	1	1	0
emodin	0	0	1	1	0
dicyclohexylurea	0	0	1	1	0
westcort	0	0	1	1	0
bongkrek-acid	0	0	1	1	0
oxymetazoline	0	0	1	1	0
tetrahydropalmatine	0	0	1	1	0
mammea-a	0	0	1	1	0
hesperidin	0	0	1	1	0
seneciphylline	0	0	1	1	0
retrorsine	0	0	1	1	0
eudesmic-acid	0	0	1	1	0
asiatic-acid	0	0	1	1	0
dihydroxyphenylglycine	0	0	1	1	0
ubenimex	0	0	1	1	0
mupirocin	0	0	1	1	0
naringenin	0	0	1	1	0
piperine	0	0	1	1	0
BRD-A94546435	0	0	1	1	0
NSC-94258	0	0	1	1	0
calycanthine	0	0	1	1	0
vincamine	0	0	1	1	0
totaralolal	0	0	1	1	0
cymarin	0	0	1	1	0
indole	0	0	1	1	0
limonin	0	0	1	1	0
7,4'-dihydroxyflavone	0	0	1	1	0
cyclopamine	0	0	1	1	0
dydrogesterone	0	0	1	1	0
brucine	0	0	1	1	0
methyl-everninic-acid	0	0	1	1	0
17-hydroxyprogesterone-caproate	0	0	1	1	0
epothilone-a	0	0	1	1	0
peruvoside	0	0	1	1	0
arcyriaflavin-a	0	0	1	1	0
larixinic-acid	0	0	1	1	0
benzylpenicillin	0	0	1	1	0
riboflavin	0	0	1	1	0
phenolphthalein	0	0	1	1	0
dictamnine	0	0	1	1	0
liquiritigenin	0	0	1	1	0
coumarin	0	0	1	1	0
piceid	0	0	1	1	0
hydroquinine	0	0	1	1	0
epitestosterone	0	0	1	1	0
dubinidine	0	0	1	1	0
ricinine	0	0	1	1	0
spectinomycin	0	0	1	1	0
dihydrosamidin	0	0	1	1	0
1-monopalmitin	0	0	1	1	0
rofecoxib	0	0	1	1	0
apramycin	0	0	1	1	0
ethaverine	0	0	1	1	0
nornicotine	0	0	1	1	0
chloramphenicol	0	0	1	1	0
liothyronine	0	0	1	1	0
telmisartan	0	0	1	1	0
nevirapine	0	0	1	1	0
hymecromone	0	0	1	1	0
byssochlamic-acid	0	0	1	1	0
trioxsalen	0	0	1	1	0
amoxicillin	0	0	1	1	0
5-methylhydantoin	0	0	1	1	0
lobendazole	0	0	1	1	0
BRD-K84571636	0	0	1	1	0
strychnine	0	0	1	1	0
ambelline	0	0	1	1	0
bergenin	0	0	1	1	0
mannitol	0	0	1	1	0
syringic-acid	0	0	1	1	0
cotinine	0	0	1	1	0
niacin	0	0	1	1	0
evoxine	0	0	1	1	0
BRD-A59728941	0	0	1	1	0
linoleamide	0	0	1	1	0
isoeugenol	0	0	1	1	0
selinidin	0	0	1	1	0
synephrine	0	0	1	1	0
rhodomyrtoxin	0	0	1	1	0
peucedanin	0	0	1	1	0
aspirin	0	0	1	1	0
oleanolic-acid	0	0	1	1	0
avermectin	0	0	1	1	0
rhapontin	0	0	1	1	0
mead-acid	0	0	1	1	0
cephalotaxine	0	0	1	1	0
linoleic-acid	0	0	1	1	0
hydrastinine	0	0	1	1	0
secoisolariciresinol	0	0	1	1	0
desoxycortone	0	0	1	1	0
alimemazine	0	0	1	1	0
rutin	0	0	1	1	0
xanthoxyline	0	0	1	1	0
tryptophan	0	0	1	1	0
felamidin	0	0	1	1	0
vinburnine	0	0	1	1	0
melatonin	0	0	1	1	0
epothilone	0	0	1	1	0
BRD-A30083233	0	0	1	1	0
phenylalanyltyrosine	0	0	1	1	0
l-stepholidine	0	0	1	1	0
protopine	0	0	1	1	0
colforsin	0	0	1	1	0
orlistat	0	0	1	1	0
pseudoephedrine	0	0	1	1	0
genipin	0	0	1	1	0
safrolglycol	0	0	1	1	0
BRD-A06779035	0	0	1	1	0
fusaric-acid	0	0	1	1	0
osthol	0	0	1	1	0
zeranol	0	0	1	1	0
naphazoline	0	0	1	1	0
pilocarpine	0	0	1	1	0
corticosterone	0	0	1	1	0
acetylcholine	0	0	1	1	0
cycloserine	0	0	1	1	0
zearalenone	0	0	1	1	0
bisindolylmaleimide	0	0	1	1	0
corynanthine	0	0	1	1	0
deoxyrhapontin	0	0	1	1	0
ST-059620	0	0	1	1	0
tropisetron	0	0	1	1	0
hypericin	0	0	1	1	0
epinephrine	0	0	1	1	0
haloperidol	0	0	1	1	0
gamma-homolinolenic-acid	0	0	1	1	0
metanephrine	0	0	1	1	0
eicosatrienoic-acid	0	0	1	1	0
butylscopolammonium	0	0	1	1	0
morin	0	0	1	1	0
methyl-testosterone	0	0	1	1	0
biotin	0	0	1	1	0
estradiol-valerate	0	0	1	1	0
pentachlorophenol	0	0	1	1	0
ethambutol	0	0	1	1	0
1,2-propylene-glycol	0	0	1	1	0
mitomycin-c	0	0	1	1	0
xanthinol	0	0	1	1	0
acetohydroxamic-acid	0	0	1	1	0
phentermine	0	0	1	1	0
BRD-K98519396	0	0	1	1	0
daphnetin	0	0	1	1	0
graveoline	0	0	1	1	0
BRD-K43807558	0	0	1	1	0
atractyloside	0	0	1	1	0
desoxycorticosterone	0	0	1	1	0
glutamine	0	0	1	1	0
skimmianine	0	0	1	1	0
monoethylhexylphthalate	0	0	1	1	0
mepireserpate	0	0	1	1	0
acetamide	0	0	1	1	0
anethole	0	0	1	1	0
lobelanidine	0	0	1	1	0
BRD-A11731846	0	0	1	1	0
BRD-K22081896	0	0	1	1	0
fluorouracil	0	0	1	1	0
propranolol	0	0	1	1	0
silibinin	0	0	1	1	0
rhizocarpic-acid	0	0	1	1	0
cosmosiin	0	0	1	1	0
alpha-tocopherol	0	0	1	1	0
BRD-A93048969	0	0	1	1	0
methyl-hydantoin	0	0	1	1	0
clavulanic-acid	0	0	1	1	0
aminolevulinic-acid	0	0	1	1	0
ipriflavone	0	0	1	1	0
penicillin	0	0	1	1	0
colchicine	0	0	1	1	0
BRD-K65200617	0	0	1	1	0
artemisinin	0	0	1	1	0
ethinylestradiol	0	0	1	1	0
BRD-K34079378	0	0	1	1	0
benzo(e)pyrene	0	0	1	1	0
dichloroacetic-acid	0	0	1	1	0
bisphenol-a	0	0	1	1	0
aflatoxin-b1	0	0	1	1	0
troleandomycin	0	0	1	1	0
fillalbin	0	0	1	1	0
homoveratrylamine	0	0	1	1	0
benzoic-acid	0	0	1	1	0
cortisol	0	0	1	1	0
urosiol	0	0	1	1	0
lobeline	0	0	1	1	0
paracetamol	0	0	1	1	0
benzatropine	0	0	1	1	0
monocrotaline	0	0	1	1	0
salsolidine	0	0	1	1	0
arbutin	0	0	1	1	0
17-beta-estradiol	0	0	1	1	0
adrenosterone	0	0	1	1	0
hexestrol	0	0	1	1	0
phenprobamate	0	0	1	1	0
chlorotrianisene	0	0	1	1	0
theobromine	0	0	1	1	0
butamben	0	0	1	1	0
catharanthine	0	0	1	1	0
glycerol	0	0	1	1	0
roxithromycin	0	0	1	1	0
acetaldehyde	0	0	1	1	0
khellin	0	0	1	1	0
kanamycin	0	0	1	1	0
acenocoumarol	0	0	1	1	0
nerol	0	0	1	1	0
tylosin	0	0	1	1	0
apicidin	0	0	1	1	0
tiletamine	0	0	1	1	0
butirosin	0	0	1	1	0
diacerein	0	0	1	1	0
aztreonam	0	0	1	1	0
levothyroxine	0	0	1	1	0
ciprofloxacin	0	0	1	1	0
pyridoxine	0	0	1	1	0
sisomicin	0	0	1	1	0
ribostamycin	0	0	1	1	0
monensin	0	0	1	1	0
guaiacol	0	0	1	1	0
xylometazoline	0	0	1	1	0
trihexyphenidyl	0	0	1	1	0
amikacin	0	0	1	1	0
neomycin	0	0	1	1	0
vancomycin	0	0	1	1	0
phenylpropanolamine	0	0	1	1	0
nadide	0	0	1	1	0
lincomycin	0	0	1	1	0
benzocaine	0	0	1	1	0
gabapentin	0	0	1	1	0
diosmin	0	0	1	1	0
verrucarin-a	0	0	1	1	0
levodopa	0	0	1	1	0
