# Supplementary material for: Towards natural mimetics of metformin and rapamycin
Source: Aging (Albany NY). 2017 Nov 15;9(11):2245–68. doi: 10.18632/aging.101319 (PMC5723685; doi:10.18632/aging.101319)
Supplement: Supplementary file 2 [file aging-09-2245-s002.xlsx]

## Sheet: DL_rap_significance_final.txt
Natural compound	# of sifnificant samples (>0.5)	total # of samples	p-value	q-value	odds ratio
sirolimus	1266	1483	0	0	9.47553
geldanamycin	1254	3153	3.77765e-297	8.17632e-294	4.29535
withaferin-a	307	809	7.49163e-66	1.08099e-62	3.66799
cerulenin	120	210	1.96885e-39	2.13069e-36	5.42671
daunorubicin	146	335	3.6417e-37	3.15283e-34	4.14676
doxorubicin	164	444	1.38672e-34	1.00047e-31	3.51742
chaetocin	123	269	4.29941e-33	2.65875e-30	4.34071
staurosporine	91	159	2.59838e-30	1.40598e-27	5.41733
radicicol	120	380	4.71109e-21	2.26593e-18	2.99137
isoliquiritigenin	74	173	3.08236e-19	1.33429e-16	4.0389
genistein	234	1135	5.85439e-18	2.30386e-15	1.96264
avicin-d	13	688	7.96262e-17	2.87237e-14	0.175558
piperlongumine	104	384	1.08284e-14	3.34813e-12	2.55976
Gossypetin	1	358	1.07929e-14	3.34813e-12	0.0260453
wortmannin	33	47	9.16257e-14	2.64419e-11	6.60331
phloretin	81	274	1.975e-13	5.34335e-11	2.78958
BRD-A15501135	24	24	1.28313e-12	2.64495e-10	9.39628
BRD-K85565420	24	24	1.28313e-12	2.64495e-10	9.39628
BRD-A35769934	24	24	1.28313e-12	2.64495e-10	9.39628
BRD-A37501891	24	24	1.28313e-12	2.64495e-10	9.39628
pidorubicine	41	85	1.22869e-12	2.64495e-10	4.5392
parthenolide	132	599	2.19193e-12	4.31292e-10	2.08433
avicin-g	12	538	3.9762e-12	7.48353e-10	0.207669
testosterone	2	321	8.1048e-12	1.46183e-09	0.0580943
resveratrol	19	636	2.48443e-11	4.30182e-09	0.278008
troglitazone	127	621	4.66146e-10	7.76095e-08	1.93242
scopolamine	3	299	5.03744e-10	8.0763e-08	0.0936311
eriodictyol	1	246	7.55105e-10	1.16739e-07	0.0379707
forskolin	8	398	1.01742e-09	1.51869e-07	0.18743
myricetin	1	237	1.61122e-09	2.32488e-07	0.0394184
idarubicin	75	312	6.26035e-09	8.74184e-07	2.26509
trichostatin-a	289	3697	5.38303e-08	7.28188e-06	0.721307
pravastatin	4	265	7.27801e-08	9.54696e-06	0.140949
metformin	2	222	8.15783e-08	1.03863e-05	0.0841551
epigallocatechin	6	300	1.01055e-07	1.24984e-05	0.186712
podophyllotoxin	1	182	4.27099e-07	4.99681e-05	0.0513784
estropipate	1	182	4.27099e-07	4.99681e-05	0.0513784
tert-butylhydroquinone	49	892	6.74131e-07	7.6794e-05	0.511376
estriol	22	512	2.09411e-06	0.000232434	0.400766
equilin	17	431	3.88459e-06	0.000420389	0.36807
phenethyl-isothiocyanate	43	172	4.03572e-06	0.000426092	2.35019
ouabain	3	198	5.85479e-06	0.000603432	0.141603
cyclosporin-a	87	466	6.24944e-06	0.000629128	1.75823
pioglitazone	1	153	6.42536e-06	0.000632137	0.0610878
rosiglitazone	12	346	8.5971e-06	0.000827	0.323825
noscapine	5	226	1.00244e-05	0.000943335	0.206737
BRD-K84924563	2	168	1.10662e-05	0.00101922	0.111293
valproic-acid	80	427	1.43572e-05	0.00129477	1.76373
menadione	76	404	1.74386e-05	0.00154057	1.77055
dehydrocholic-acid	1	137	3.08873e-05	0.0026741	0.06825
acarbose	2	154	3.35145e-05	0.00284465	0.121436
epirubicin	10	14	3.79035e-05	0.00315532	6.69954
evodiamine	3	171	4.89699e-05	0.00399963	0.164027
AICA-ribonucleotide	3	173	5.12402e-05	0.00410756	0.162126
quinidine	5	205	5.50885e-05	0.00433576	0.227985
3,3'-diindolylmethane	1	126	6.22858e-05	0.00481468	0.0742299
tacrolimus	4	181	8.96795e-05	0.00681059	0.206617
rotenone	7	230	9.89173e-05	0.00738262	0.284459
glycodeoxycholic-acid	2	143	0.000103191	0.00757104	0.130799
simvastatin	17	374	0.000139952	0.010097	0.424524
naproxen	2	141	0.000158522	0.0112493	0.132658
cytosporone-b	4	173	0.000178598	0.0124695	0.216197
cantharidin	9	15	0.000243443	0.0167272	5.62738
fumonisin-b1	4	170	0.000254506	0.0172141	0.220022
prostaglandin-a1	8	232	0.000268822	0.0179027	0.322329
brefeldin-a	50	260	0.000320012	0.0206756	1.80729
diethylstilbestrol	32	554	0.000318046	0.0206756	0.539148
myriocin	4	167	0.000366873	0.0233546	0.223984
salsolinol	1	107	0.000440743	0.0276505	0.0874371
cortisone	2	128	0.000467911	0.0289355	0.146159
curcumin	72	1010	0.000500913	0.0305401	0.664573
emetine	3	141	0.000582172	0.0350014	0.199014
lithocholic-acid	1	101	0.000629905	0.0361955	0.0926396
nobiletin	1	102	0.00063548	0.0361955	0.09173
nelfinavir	1	101	0.000629905	0.0361955	0.0926396
pregnenolone	1	102	0.00063548	0.0361955	0.09173
rottlerin	66	388	0.000773719	0.0434969	1.59913
deoxycholic-acid	3	136	0.000823191	0.0456849	0.206346
donepezil	2	119	0.000951369	0.0504731	0.157234
physostigmine	2	118	0.000932202	0.0504731	0.158568
strophanthidin	1	99	0.000956108	0.0504731	0.0945139
chenodeoxycholic-acid	1	99	0.000956108	0.0504731	0.0945139
camptothecin	4	152	0.000971439	0.0506645	0.246142
cisapride	6	183	0.00116694	0.0601363	0.306613
alpha-linolenic-acid	1	94	0.0013736	0.0691397	0.0995485
phenacetin	1	94	0.0013736	0.0691397	0.0995485
butylparaben	1	95	0.00140717	0.0697353	0.0984992
caffeine	2	116	0.00141765	0.0697353	0.161307
diphencyprone	12	37	0.00197388	0.0946977	3.04173
indirubin	1	88	0.0019877	0.0946977	0.106345
androstenedione	1	89	0.00199074	0.0946977	0.105149
A-23187	14	49	0.00234353	0.110268	2.68008
cycloheximide	12	255	0.00247666	0.115279	0.439976
brazilin	19	77	0.00254571	0.115998	2.31525
estrone	26	436	0.0025443	0.115998	0.557125
hydrocortisone	2	104	0.00272251	0.122762	0.179951
apigenin	5	156	0.00288437	0.126321	0.299812
HO-013	1	85	0.00291816	0.126321	0.110104
tramadol	2	107	0.00285255	0.126321	0.174898
estradiol-benzoate	1	85	0.00291816	0.126321	0.110104
BRD-K59946561	1	86	0.00296264	0.126977	0.108822
geranylgeraniol	1	87	0.00304271	0.127876	0.107569
retinyl	1	87	0.00304271	0.127876	0.107569
triptolide	9	24	0.00323084	0.134477	3.51643
benzydamine	1	81	0.00427491	0.174229	0.115548
ergocryptine	1	82	0.00434688	0.174229	0.114137
lupanine	1	82	0.00434688	0.174229	0.114137
dehydroisoandosterone	1	80	0.00425254	0.174229	0.116994
epicatechin	1	83	0.00446966	0.175893	0.11276
paclitaxel	1	83	0.00446966	0.175893	0.11276
alpha-estradiol	53	318	0.00455618	0.177683	1.56562
tretinoin	36	197	0.00507363	0.196095	1.71565
dinoprostone	2	95	0.00556117	0.211379	0.197025
erythromycin	2	96	0.00556673	0.211379	0.19497
capsaicin	11	227	0.00577115	0.217236	0.453184
thiostrepton	30	159	0.00626824	0.233913	1.77092
mevastatin	3	112	0.00647745	0.239654	0.250651
prostaglandin-e1	1	79	0.00656053	0.240671	0.118476
dopamine	2	92	0.00794387	0.288969	0.203459
doconexent	3	108	0.00908407	0.319699	0.25995
ergometrine	1	72	0.00907222	0.319699	0.130008
reserpine	1	72	0.00907222	0.319699	0.130008
ryanodine	1	72	0.00907222	0.319699	0.130008
noreleagnine	1	75	0.00962057	0.33585	0.124802
butein	15	62	0.010009	0.343864	2.26916
flavokavain-b	15	62	0.010009	0.343864	2.26916
hydroxycholesterol	2	90	0.0117333	0.396805	0.207986
BRD-K65411918	2	90	0.0117333	0.396805	0.207986
deltaline	1	70	0.0136643	0.434924	0.133727
coumaric-acid	1	70	0.0136643	0.434924	0.133727
delcorine	1	69	0.0133789	0.434924	0.135667
coumestrol	1	67	0.01323	0.434924	0.139721
ginsenoside	1	70	0.0136643	0.434924	0.133727
herniarin	1	69	0.0133789	0.434924	0.135667
maackiain	1	69	0.0133789	0.434924	0.135667
veratridine	1	68	0.0132347	0.434924	0.137664
pinocembrin	1	71	0.0140927	0.442059	0.131841
scoulerine	1	71	0.0140927	0.442059	0.131841
lovastatin	24	367	0.0160142	0.483941	0.611412
estradiol-cypionate	2	83	0.0159761	0.483941	0.225551
desoxypeganine	2	83	0.0159761	0.483941	0.225551
sappanone-a	2	83	0.0159761	0.483941	0.225551
cinchonine	2	84	0.0160986	0.483941	0.222862
methyl-2,5-dihydroxycinnamate	2	84	0.0160986	0.483941	0.222862
kavain	2	85	0.0163525	0.484839	0.220237
leucodin	2	85	0.0163525	0.484839	0.220237
5-methoxytryptamine	2	86	0.016739	0.492922	0.217673
docosatrienoic-acid	1	63	0.0192393	0.517798	0.1486
galantamine	3	101	0.0181204	0.517798	0.277994
BRD-A04172077	1	66	0.0199761	0.517798	0.14184
capecitabine	1	63	0.0192393	0.517798	0.1486
hippeastrine	1	65	0.0195339	0.517798	0.144024
diethyltoluamide	1	66	0.0199761	0.517798	0.14184
eugenitol	1	63	0.0192393	0.517798	0.1486
BRD-K97951054	1	66	0.0199761	0.517798	0.14184
endecaphyllin-x	1	66	0.0199761	0.517798	0.14184
BRD-A98888159	1	66	0.0199761	0.517798	0.14184
hinokitiol	1	64	0.0192888	0.517798	0.146276
BRD-K73700643	1	66	0.0199761	0.517798	0.14184
lasalocid	4	113	0.0178481	0.517798	0.331284
mocimycin	1	66	0.0199761	0.517798	0.14184
boldine	1	63	0.0192393	0.517798	0.1486
auraptene	1	66	0.0199761	0.517798	0.14184
depudecin	1	63	0.0192393	0.517798	0.1486
skatole	1	64	0.0192888	0.517798	0.146276
lavendustin-a	1	66	0.0199761	0.517798	0.14184
ergocornine	1	65	0.0195339	0.517798	0.144024
papaverine	2	78	0.022589	0.582041	0.240026
latrunculin-b	5	122	0.0237233	0.599598	0.383558
tubocurarine	2	82	0.0238244	0.599598	0.228304
ciprofibrate	2	82	0.0238244	0.599598	0.228304
ritonavir	2	82	0.0238244	0.599598	0.228304
BRD-K49061529	1	60	0.0280823	0.702672	0.156037
gamma-linolenic-acid	1	62	0.029165	0.713273	0.150999
pseudopelletierine	1	62	0.029165	0.713273	0.150999
hydrastine	1	62	0.029165	0.713273	0.150999
BRD-A95820578	1	62	0.029165	0.713273	0.150999
epoxycholesterol	17	89	0.0318718	0.765591	1.79144
taxifolin	2	74	0.0318588	0.765591	0.253016
gingerol	2	75	0.031994	0.765591	0.249639
flavanone	2	76	0.0323654	0.765591	0.24635
methoxsalen	5	120	0.032179	0.765591	0.389962
icosapent	2	76	0.0323654	0.765591	0.24635
taurocholic-acid	3	89	0.0331616	0.780161	0.315532
rhamnetin	4	106	0.0335983	0.786162	0.353198
AVA	7	143	0.0369998	0.8611	0.458108
BRD-K07476834	5	15	0.0377064	0.872851	3.12465
procyclidine	1	56	0.0408342	0.935253	0.167193
toremifene	6	131	0.0406823	0.935253	0.42865
SAL-1	1	57	0.0414876	0.945215	0.164257
retinol	19	170	0.805211	1	1.04727
ingenol	38	300	0.309643	1	1.18773
tamoxifen	115	964	0.253149	1	1.11955
thapsigargin	38	254	0.05839	1	1.40377
BRD-K85853281	6	39	0.442016	1	1.44175
chloroquine	51	401	0.230715	1	1.19293
sulforaphane	130	1195	0.814473	1	1.01958
4-hydroxy-2-nonenal	6	34	0.275085	1	1.65389
celastrol	27	179	0.0973487	1	1.41474
homoharringtonine	29	182	0.0471697	1	1.49483
disulfiram	9	46	0.105051	1	1.83408
mycophenolic-acid	15	145	1	1	0.969153
phorbol-myristate-acetate	14	124	0.77356	1	1.05793
narciclasine	33	263	0.37413	1	1.17639
oligomycin-a	22	241	0.531341	1	0.854817
puromycin	12	79	0.282388	1	1.42384
norepinephrine	2	69	0.0657158	1	0.27137
clomifene	19	206	0.65045	1	0.863771
BRD-A52530852	1	24	0.507536	1	0.390298
BRD-K65981456	1	23	0.724238	1	0.407274
gossypol	20	183	0.905075	1	1.02401
paroxetine	22	172	0.394662	1	1.19897
cytochalasin-b	27	167	0.050573	1	1.51666
estradiol	120	1082	0.693457	1	1.03975
ellipticine	4	99	0.044485	1	0.37821
hyperoside	1	37	0.175583	1	0.253119
ivermectin	4	68	0.317408	1	0.550879
NU-1025	44	324	0.132325	1	1.274
gelsemine	1	52	0.05929	1	0.180064
anisomycin	4	79	0.189105	1	0.474098
prostratin	2	50	0.234992	1	0.374595
BRD-A14178283	3	58	0.278258	1	0.484399
caffeic-acid-phenethyl-ester	7	36	0.187083	1	1.82254
bufalin	2	55	0.172383	1	0.340516
marmesin	1	53	0.0603194	1	0.176664
piceatannol	25	214	0.660168	1	1.09481
antimycin-a	3	71	0.115449	1	0.395631
xanthohumol	8	67	0.695972	1	1.11881
penitrem-a	6	83	0.47113	1	0.677033
ungerine	2	71	0.0451181	1	0.263718
emodic-acid	2	69	0.0657158	1	0.27137
BRD-K59460069	10	62	0.227403	1	1.51183
luteolin	7	34	0.110796	1	1.92988
carnosol	2	23	1	1	0.814633
esculin	3	70	0.159998	1	0.401289
sphingosine	3	61	0.284126	1	0.460556
guggulsterone	14	132	1	1	0.99368
tangeritin	2	66	0.0629163	1	0.283718
equol	13	144	0.684343	1	0.84553
ursolic-acid	17	199	0.420657	1	0.799883
farnesol	4	88	0.108512	1	0.425555
isoquercetin	1	36	0.257388	1	0.260153
prunetin	1	26	0.511184	1	0.360265
deguelin	4	62	0.407741	1	0.604245
chelidonine	3	75	0.0851174	1	0.374509
butyrolactone	1	22	0.720237	1	0.425792
lomatin	2	53	0.168974	1	0.353376
z-guggulsterone	1	23	0.724238	1	0.407274
BRD-K46836114	2	37	0.582549	1	0.506305
pterostilbene	3	60	0.281381	1	0.468238
methylnorlichexanthone	4	27	0.535857	1	1.38821
arctigenin	6	101	0.18934	1	0.556217
rhodomyrtoxin-b	3	52	0.36711	1	0.540338
harmine	1	23	0.724238	1	0.407274
androsta-1,4-dien-3,17-dione	2	63	0.0889173	1	0.297241
hydroquinidine	4	61	0.52475	1	0.614161
caffeic-acid	7	112	0.211684	1	0.585172
kawain	1	53	0.0603194	1	0.176664
daidzein	4	52	0.655099	1	0.720569
nitrarine	1	53	0.0603194	1	0.176664
prostaglandin	2	65	0.0627964	1	0.288087
eicosadienoic-acid	1	53	0.0603194	1	0.176664
rathyronine	2	47	0.231747	1	0.398523
tremulacin	1	49	0.0875173	1	0.191097
oligomycin-c	2	37	0.582549	1	0.506305
ochratoxin-a	5	66	0.685208	1	0.709602
benzo(a)pyrene	3	33	1	1	0.851661
palmitoylethanolamide	2	64	0.0903242	1	0.292592
umbelliferone	2	69	0.0657158	1	0.27137
BRD-K13195996	1	24	0.507536	1	0.390298
1-methylisoquinoline	1	24	0.507536	1	0.390298
dantron	2	62	0.088027	1	0.30204
digitoxin	1	9	1	1	1.04103
securinine	2	62	0.088027	1	0.30204
periplocymarin	1	51	0.0587664	1	0.183597
hydroxytyrosol	1	24	0.507536	1	0.390298
BRD-A30395175	2	37	0.582549	1	0.506305
honokiol	1	37	0.175583	1	0.253119
laudanosine	1	53	0.0603194	1	0.176664
plumbagin	1	18	1	1	0.520443
GR-235	4	67	0.316849	1	0.55911
damnacanthal	1	33	0.251135	1	0.283816
dihydroergocristine	2	64	0.0903242	1	0.292592
acadesine	2	60	0.12616	1	0.312117
tetrahydrocannabinol-7-oic-acid	1	52	0.05929	1	0.180064
BRD-A26347577	2	24	1	1	0.780672
heliomycin	1	44	0.124274	1	0.212828
penicillic-acid	3	53	0.367154	1	0.530136
efavirenz	1	47	0.0850223	1	0.199234
isosalsoline	2	24	1	1	0.780672
imperatorin	2	65	0.0627964	1	0.288087
lobaric-acid	2	52	0.168483	1	0.360177
harpagoside	2	61	0.0876608	1	0.306996
fisetinidol	2	53	0.168974	1	0.353376
licochalcone-a	2	23	1	1	0.814633
erbstatin-analog	4	44	1	1	0.851641
heliotrine	1	52	0.05929	1	0.180064
PMSF	1	23	0.724238	1	0.407274
benzethonium	1	12	1	1	0.780702
salvinorin-a	2	66	0.0629163	1	0.283718
karakoline	1	49	0.0875173	1	0.191097
betulinic-acid	2	65	0.0627964	1	0.288087
isoreserpine	4	65	0.41108	1	0.57633
helveticoside	2	53	0.168974	1	0.353376
BRD-A62200266	1	41	0.182623	1	0.228411
etoposide	1	35	0.253933	1	0.26759
foliosidine	2	69	0.0657158	1	0.27137
racephedrine	1	53	0.0603194	1	0.176664
scandenin	1	27	0.515394	1	0.346917
BRD-A84066268	2	14	0.662905	1	1.33852
salsoline	1	24	0.507536	1	0.390298
epibatidine	1	53	0.0603194	1	0.176664
rotenonic-acid	2	67	0.0634453	1	0.279479
BRD-A79058669	1	24	0.507536	1	0.390298
C2-dihydroceramide	1	21	0.7173	1	0.446074
phylloquinone	1	45	0.126643	1	0.208095
sinensetin	2	66	0.0629163	1	0.283718
eugenol	1	53	0.0603194	1	0.176664
catechin	1	32	0.367674	1	0.29269
psoromic-acid	1	27	0.515394	1	0.346917
bicuculline	1	35	0.253933	1	0.26759
nicotinyl-alcohol-tartrate	1	49	0.0875173	1	0.191097
ephedrine	1	53	0.0603194	1	0.176664
BRD-K19653414	1	24	0.507536	1	0.390298
sulfasalazine	1	49	0.0875173	1	0.191097
glucosamine	1	23	0.724238	1	0.407274
lysergol	0	0	1	1	0
cholic-acid	0	0	1	1	0
anabasine	0	0	1	1	0
phenylbutyrate	0	0	1	1	0
BL-077	0	0	1	1	0
BRD-K63116520	0	0	1	1	0
tetramethylsilane	0	0	1	1	0
lanatoside-c	0	0	1	1	0
naringin	0	0	1	1	0
cephaeline	0	0	1	1	0
ebelactone-b	0	0	1	1	0
BRD-K42823101	0	0	1	1	0
octopamine	0	0	1	1	0
salicin	0	0	1	1	0
paxilline	0	0	1	1	0
buddleoflavonoloside	0	0	1	1	0
kaempferol	0	0	1	1	0
ropinirole	0	0	1	1	0
hyoscyamine	0	0	1	1	0
prostaglandin-b2	0	0	1	1	0
fraxetin	0	0	1	1	0
asiaticoside	0	0	1	1	0
valyltryptophan	0	0	1	1	0
alfadolone	0	0	1	1	0
theophylline	0	0	1	1	0
yohimbine	0	0	1	1	0
dicoumarol	0	0	1	1	0
androstenol	0	0	1	1	0
aristolochic-acid	0	0	1	1	0
BRD-K52640952	0	0	1	1	0
nicotine	0	0	1	1	0
napelline	0	0	1	1	0
pentobarbital	0	0	1	1	0
6-hydroxytropinone	0	0	1	1	0
rosmarinic-acid	0	0	1	1	0
fraxidin	0	0	1	1	0
rescinnamine	0	0	1	1	0
ethinyl-estradiol	0	0	1	1	0
digoxin	0	0	1	1	0
emodin	0	0	1	1	0
dicyclohexylurea	0	0	1	1	0
westcort	0	0	1	1	0
bongkrek-acid	0	0	1	1	0
oxymetazoline	0	0	1	1	0
tetrahydropalmatine	0	0	1	1	0
mammea-a	0	0	1	1	0
hesperidin	0	0	1	1	0
seneciphylline	0	0	1	1	0
retrorsine	0	0	1	1	0
eudesmic-acid	0	0	1	1	0
anandamide	0	0	1	1	0
asiatic-acid	0	0	1	1	0
dihydroxyphenylglycine	0	0	1	1	0
ubenimex	0	0	1	1	0
mupirocin	0	0	1	1	0
naringenin	0	0	1	1	0
piperine	0	0	1	1	0
BRD-A94546435	0	0	1	1	0
NSC-94258	0	0	1	1	0
calycanthine	0	0	1	1	0
vincamine	0	0	1	1	0
totaralolal	0	0	1	1	0
cymarin	0	0	1	1	0
gallic-acid	0	0	1	1	0
BRD-K97808269	0	0	1	1	0
indole	0	0	1	1	0
limonin	0	0	1	1	0
geranyl-geranyl-pyrophosphate	0	0	1	1	0
7,4'-dihydroxyflavone	0	0	1	1	0
cyclopamine	0	0	1	1	0
dydrogesterone	0	0	1	1	0
brucine	0	0	1	1	0
methyl-everninic-acid	0	0	1	1	0
17-hydroxyprogesterone-caproate	0	0	1	1	0
dihydrocapsaicin	0	0	1	1	0
epothilone-a	0	0	1	1	0
peruvoside	0	0	1	1	0
arcyriaflavin-a	0	0	1	1	0
larixinic-acid	0	0	1	1	0
benzylpenicillin	0	0	1	1	0
riboflavin	0	0	1	1	0
phenolphthalein	0	0	1	1	0
dictamnine	0	0	1	1	0
liquiritigenin	0	0	1	1	0
coumarin	0	0	1	1	0
piceid	0	0	1	1	0
progesterone	0	0	1	1	0
hydroquinine	0	0	1	1	0
epitestosterone	0	0	1	1	0
dubinidine	0	0	1	1	0
ricinine	0	0	1	1	0
spectinomycin	0	0	1	1	0
dihydrosamidin	0	0	1	1	0
1-monopalmitin	0	0	1	1	0
rofecoxib	0	0	1	1	0
apramycin	0	0	1	1	0
ethaverine	0	0	1	1	0
nornicotine	0	0	1	1	0
chloramphenicol	0	0	1	1	0
liothyronine	0	0	1	1	0
telmisartan	0	0	1	1	0
nevirapine	0	0	1	1	0
hymecromone	0	0	1	1	0
spermidine	0	0	1	1	0
byssochlamic-acid	0	0	1	1	0
trioxsalen	0	0	1	1	0
amoxicillin	0	0	1	1	0
5-methylhydantoin	0	0	1	1	0
taurodeoxycholic-acid	0	0	1	1	0
lobendazole	0	0	1	1	0
BRD-K84571636	0	0	1	1	0
strychnine	0	0	1	1	0
ambelline	0	0	1	1	0
bergenin	0	0	1	1	0
ketocholesterol	0	0	1	1	0
glycocholic-acid	0	0	1	1	0
mannitol	0	0	1	1	0
syringic-acid	0	0	1	1	0
cotinine	0	0	1	1	0
5-hydroxytryptophan	0	0	1	1	0
niacin	0	0	1	1	0
evoxine	0	0	1	1	0
BRD-A59728941	0	0	1	1	0
linoleamide	0	0	1	1	0
isoeugenol	0	0	1	1	0
selinidin	0	0	1	1	0
synephrine	0	0	1	1	0
rhodomyrtoxin	0	0	1	1	0
peucedanin	0	0	1	1	0
aspirin	0	0	1	1	0
oleanolic-acid	0	0	1	1	0
ellagic-acid	0	0	1	1	0
BRD-K95847244	0	0	1	1	0
avermectin	0	0	1	1	0
rhapontin	0	0	1	1	0
mead-acid	0	0	1	1	0
cephalotaxine	0	0	1	1	0
linoleic-acid	0	0	1	1	0
hydrastinine	0	0	1	1	0
secoisolariciresinol	0	0	1	1	0
desoxycortone	0	0	1	1	0
alimemazine	0	0	1	1	0
rutin	0	0	1	1	0
xanthoxyline	0	0	1	1	0
tryptophan	0	0	1	1	0
felamidin	0	0	1	1	0
vinburnine	0	0	1	1	0
melatonin	0	0	1	1	0
epothilone	0	0	1	1	0
BRD-A30083233	0	0	1	1	0
phenylalanyltyrosine	0	0	1	1	0
l-stepholidine	0	0	1	1	0
protopine	0	0	1	1	0
bafilomycin	0	0	1	1	0
colforsin	0	0	1	1	0
orlistat	0	0	1	1	0
pseudoephedrine	0	0	1	1	0
genipin	0	0	1	1	0
anacardic-acid	0	0	1	1	0
safrolglycol	0	0	1	1	0
BRD-A06779035	0	0	1	1	0
fusaric-acid	0	0	1	1	0
osthol	0	0	1	1	0
zeranol	0	0	1	1	0
farnesylpyrophosphate	0	0	1	1	0
BRD-K74773935	0	0	1	1	0
naphazoline	0	0	1	1	0
pilocarpine	0	0	1	1	0
corticosterone	0	0	1	1	0
acetylcholine	0	0	1	1	0
cycloserine	0	0	1	1	0
BRD-A32582647	0	0	1	1	0
zearalenone	0	0	1	1	0
bisindolylmaleimide	0	0	1	1	0
corynanthine	0	0	1	1	0
deoxyrhapontin	0	0	1	1	0
ST-059620	0	0	1	1	0
tropisetron	0	0	1	1	0
hypericin	0	0	1	1	0
epinephrine	0	0	1	1	0
haloperidol	0	0	1	1	0
gamma-homolinolenic-acid	0	0	1	1	0
metanephrine	0	0	1	1	0
eicosatrienoic-acid	0	0	1	1	0
butylscopolammonium	0	0	1	1	0
morin	0	0	1	1	0
methyl-testosterone	0	0	1	1	0
biotin	0	0	1	1	0
estradiol-valerate	0	0	1	1	0
pentachlorophenol	0	0	1	1	0
ethambutol	0	0	1	1	0
1,2-propylene-glycol	0	0	1	1	0
allantoin	0	0	1	1	0
mitomycin-c	0	0	1	1	0
xanthinol	0	0	1	1	0
acetohydroxamic-acid	0	0	1	1	0
phentermine	0	0	1	1	0
BRD-K98519396	0	0	1	1	0
daphnetin	0	0	1	1	0
graveoline	0	0	1	1	0
BRD-K43807558	0	0	1	1	0
atractyloside	0	0	1	1	0
desoxycorticosterone	0	0	1	1	0
cardamonin	0	0	1	1	0
glutamine	0	0	1	1	0
skimmianine	0	0	1	1	0
monoethylhexylphthalate	0	0	1	1	0
methyltyramine	0	0	1	1	0
mepireserpate	0	0	1	1	0
acetamide	0	0	1	1	0
anethole	0	0	1	1	0
lobelanidine	0	0	1	1	0
BRD-A11731846	0	0	1	1	0
vanillyl-glycol	0	0	1	1	0
BRD-K22081896	0	0	1	1	0
fluorouracil	0	0	1	1	0
propranolol	0	0	1	1	0
silibinin	0	0	1	1	0
rhizocarpic-acid	0	0	1	1	0
cosmosiin	0	0	1	1	0
alpha-tocopherol	0	0	1	1	0
BRD-A93048969	0	0	1	1	0
methyl-hydantoin	0	0	1	1	0
clavulanic-acid	0	0	1	1	0
aminolevulinic-acid	0	0	1	1	0
ipriflavone	0	0	1	1	0
penicillin	0	0	1	1	0
colchicine	0	0	1	1	0
nicotinamide	0	0	1	1	0
BRD-K65200617	0	0	1	1	0
artemisinin	0	0	1	1	0
ethinylestradiol	0	0	1	1	0
BRD-K34079378	0	0	1	1	0
benzo(e)pyrene	0	0	1	1	0
dichloroacetic-acid	0	0	1	1	0
bisphenol-a	0	0	1	1	0
aflatoxin-b1	0	0	1	1	0
troleandomycin	0	0	1	1	0
fillalbin	0	0	1	1	0
1,2,3,4-tetrahydroisoquinoline	0	0	1	1	0
homoveratrylamine	0	0	1	1	0
benzoic-acid	0	0	1	1	0
cortisol	0	0	1	1	0
urosiol	0	0	1	1	0
lobeline	0	0	1	1	0
paracetamol	0	0	1	1	0
benzatropine	0	0	1	1	0
monocrotaline	0	0	1	1	0
salsolidine	0	0	1	1	0
arbutin	0	0	1	1	0
17-beta-estradiol	0	0	1	1	0
adrenosterone	0	0	1	1	0
hexestrol	0	0	1	1	0
phenprobamate	0	0	1	1	0
chlorotrianisene	0	0	1	1	0
theobromine	0	0	1	1	0
butamben	0	0	1	1	0
catharanthine	0	0	1	1	0
glycerol	0	0	1	1	0
roxithromycin	0	0	1	1	0
acetaldehyde	0	0	1	1	0
khellin	0	0	1	1	0
kanamycin	0	0	1	1	0
trehalose	0	0	1	1	0
acenocoumarol	0	0	1	1	0
nerol	0	0	1	1	0
tylosin	0	0	1	1	0
apicidin	0	0	1	1	0
tiletamine	0	0	1	1	0
butirosin	0	0	1	1	0
diacerein	0	0	1	1	0
aztreonam	0	0	1	1	0
levothyroxine	0	0	1	1	0
ciprofloxacin	0	0	1	1	0
pyridoxine	0	0	1	1	0
sisomicin	0	0	1	1	0
ribostamycin	0	0	1	1	0
monensin	0	0	1	1	0
guaiacol	0	0	1	1	0
xylometazoline	0	0	1	1	0
trihexyphenidyl	0	0	1	1	0
amikacin	0	0	1	1	0
neomycin	0	0	1	1	0
vancomycin	0	0	1	1	0
phenylpropanolamine	0	0	1	1	0
nadide	0	0	1	1	0
lincomycin	0	0	1	1	0
benzocaine	0	0	1	1	0
gabapentin	0	0	1	1	0
diosmin	0	0	1	1	0
verrucarin-a	0	0	1	1	0
levodopa	0	0	1	1	0
