# Supplementary material for: Towards natural mimetics of metformin and rapamycin
Source: Aging (Albany NY). 2017 Nov 15;9(11):2245–68. doi: 10.18632/aging.101319 (PMC5723685; doi:10.18632/aging.101319)
Supplement: Supplementary file 3 [file aging-09-2245-s003.xlsx]

## Sheet: unpdkegg_broad_overlap_withpexr
Drug1	pert_id1	pert_time1	pert_dose1	FDR1	cell_line1	Drug2	pert_id2	pert_time2	pert_dose2	FDR2	cell_line2	pval	LOR
chloramphenicol	BRD-A51182606	6	10um	FDR	HT29	metformin	BRD-K79602928	6	10um	FDR	HT29	1.33783e-73	3.46466
amoxicillin	BRD-K55044200	6	10um	FDR	HT29	metformin	BRD-K79602928	6	10um	FDR	HT29	1.01782e-59	3.01833
spectinomycin	BRD-K11905747	6	10um	FDR	HT29	metformin	BRD-K79602928	6	10um	FDR	HT29	2.63408e-58	3.22183
mitomycin-c	BRD-K51418664	6	10um	FDR	HT29	metformin	BRD-K79602928	6	10um	FDR	HT29	2.64012e-53	2.76437
theophylline	BRD-K97799481	6	10um	FDR	HT29	metformin	BRD-K79602928	6	10um	FDR	HT29	2.35508e-52	2.80169
ritonavir	BRD-A03323675	6	10um	FDR	HT29	metformin	BRD-K79602928	6	10um	FDR	HT29	7.42161e-50	2.93023
paroxetine	BRD-A62326914	6	10um	FDR	HT29	metformin	BRD-K79602928	6	10um	FDR	HT29	2.66585e-49	2.78355
bafilomycin	BRD-A56798952	6.4	10um	FDR	NEU.KCL	sirolimus	BRD-A50287119	6.4	10um	FDR	NEU.KCL	3.36495e-48	3.10503
erbstatin-analog	BRD-K35573744	6	10um	FDR	HT29	metformin	BRD-K79602928	6	10um	FDR	HT29	1.02038e-46	3.28071
HO-013	BRD-K86465814	6.4	10um	FDR	NEU.KCL	sirolimus	BRD-A50287119	6.4	10um	FDR	NEU.KCL	1.1828e-45	3.1149
cortisone	BRD-K86161929	6	10um	FDR	HT29	metformin	BRD-K79602928	6	10um	FDR	HT29	3.77465e-43	2.82362
pravastatin	BRD-A11170096	6	10um	FDR	HT29	metformin	BRD-K79602928	6	10um	FDR	HT29	3.68702e-41	2.75608
epinephrine	BRD-A07765530	6	10um	FDR	HT29	metformin	BRD-K79602928	6	10um	FDR	HT29	2.97041e-40	3.10239
heliomycin	BRD-K64517075	6	10um	FDR	HT29	metformin	BRD-K79602928	6	10um	FDR	HT29	3.10926e-40	2.33317
tamoxifen	BRD-K93754473	6	28.39um	FDR	HEPG2	sirolimus	BRD-A23770159	6	11.1um	FDR	HEPG2	4.1135e-38	2.63465
epigallocatechin	BRD-K55591206	6.4	10um	FDR	NEU.KCL	sirolimus	BRD-A50287119	6.4	10um	FDR	NEU.KCL	2.31097e-36	2.61401
aspirin	BRD-K11433652	6	10um	FDR	HT29	metformin	BRD-K79602928	6	10um	FDR	HT29	4.23837e-36	2.92857
radicicol	BRD-K33551950	24	10um	FDR	A549	sirolimus	BRD-K84937637	24	10um	FDR	A549	1.17938e-34	2.29917
westcort	BRD-A23290232	6	10um	FDR	HT29	metformin	BRD-K79602928	6	10um	FDR	HT29	7.44998e-30	2.96926
sphingosine	BRD-K62959606	24	10um	FDR	A549	sirolimus	BRD-K84937637	24	10um	FDR	A549	8.60921e-29	2.04477
HO-013	BRD-K86465814	24.4	10um	FDR	NEU.KCL	sirolimus	BRD-A50287119	24.4	10um	FDR	NEU.KCL	1.85162e-28	2.86809
quinidine	BRD-A64479082	6	10um	FDR	HT29	metformin	BRD-K79602928	6	10um	FDR	HT29	3.308e-28	2.95011
bafilomycin	BRD-A56798952	24.4	10um	FDR	NEU.KCL	sirolimus	BRD-A50287119	24.4	10um	FDR	NEU.KCL	3.89991e-28	2.94726
genipin	BRD-A04308630	6	10um	FDR	HT29	metformin	BRD-K79602928	6	10um	FDR	HT29	1.2505e-27	1.88524
verrucarin-a	BRD-A26002865	24	10um	FDR	A549	sirolimus	BRD-K84937637	24	10um	FDR	A549	2.77697e-27	1.99698
digoxin	BRD-A75144621	6	10um	FDR	HT29	metformin	BRD-K79602928	6	10um	FDR	HT29	5.10548e-27	1.84565
myriocin	BRD-A76279427	24	10um	FDR	A549	sirolimus	BRD-A23770159	24	11.1um	FDR	A549	6.03394e-26	1.79168
geldanamycin	BRD-K11528507	24.4	10um	FDR	NEU.KCL	sirolimus	BRD-A50287119	24.4	10um	FDR	NEU.KCL	1.47076e-25	3.00567
tamoxifen	BRD-K93754473	24	28.39um	FDR	A549	sirolimus	BRD-A23770159	24	11.1um	FDR	A549	2.73036e-25	1.73073
isoliquiritigenin	BRD-K33583600	6	10um	FDR	HEPG2	sirolimus	BRD-A23770159	6	11.1um	FDR	HEPG2	4.94296e-25	2.38737
bafilomycin	BRD-A56798952	24.4	1um	FDR	NEU.KCL	sirolimus	BRD-A50287119	24.4	10um	FDR	NEU.KCL	4.12419e-24	2.71669
geldanamycin	BRD-A19500257	24.4	10um	FDR	NEU.KCL	sirolimus	BRD-A50287119	24.4	10um	FDR	NEU.KCL	5.19541e-24	2.75087
tamoxifen	BRD-K93754473	24.4	10um	FDR	NEU.KCL	sirolimus	BRD-A50287119	24.4	10um	FDR	NEU.KCL	6.88172e-24	2.6048
17-beta-estradiol	BRD-K66766661	6	10um	FDR	HT29	metformin	BRD-K79602928	6	10um	FDR	HT29	2.08401e-22	2.24925
C2-dihydroceramide	BRD-K62910157	24.4	10um	FDR	NEU.KCL	sirolimus	BRD-A50287119	24.4	10um	FDR	NEU.KCL	8.05643e-20	2.28972
trehalose	BRD-K54028654	24.4	10um	FDR	NEU.KCL	sirolimus	BRD-A50287119	24.4	10um	FDR	NEU.KCL	6.69875e-19	2.2372
geranylgeraniol	BRD-K95402279	24.4	10um	FDR	NEU.KCL	sirolimus	BRD-A50287119	24.4	10um	FDR	NEU.KCL	6.29835e-18	2.36318
phenylbutyrate	BRD-K67102207	6	10um	FDR	HT29	metformin	BRD-K79602928	6	10um	FDR	HT29	7.0779e-17	3.53045
cytosporone-b	BRD-K86191271	24	10um	FDR	A549	sirolimus	BRD-A23770159	24	11.1um	FDR	A549	1.99243e-16	1.32055
glycocholic-acid	BRD-K54771420	6.4	10um	FDR	NEU.KCL	sirolimus	BRD-A50287119	6.4	10um	FDR	NEU.KCL	2.14602e-16	2.12871
isoliquiritigenin	BRD-K33583600	24	10um	FDR	A549	sirolimus	BRD-A23770159	24	11.1um	FDR	A549	2.75637e-16	1.34574
paxilline	BRD-K38251852	24.4	10um	FDR	NEU.KCL	sirolimus	BRD-A50287119	24.4	10um	FDR	NEU.KCL	9.58731e-16	2.56071
staurosporine	BRD-K17953061	24.4	10um	FDR	NEU.KCL	sirolimus	BRD-A50287119	24.4	10um	FDR	NEU.KCL	1.42605e-15	2.11165
harmine	BRD-K30984264	24.4	10um	FDR	NEU.KCL	sirolimus	BRD-A50287119	24.4	10um	FDR	NEU.KCL	3.64991e-15	2.03793
withaferin-a	BRD-A52193669	6	10um	FDR	A549	metformin	BRD-K79602928	6	10um	FDR	HT29	4.05148e-15	1.33308
cerulenin	BRD-K52075040	24	44.4um	FDR	HT29	sirolimus	BRD-A79768653	24	10um	FDR	HT29	5.58098e-15	2.73019
plumbagin	BRD-K36137799	6	10um	FDR	NPC	sirolimus	BRD-A50287119	6	10um	FDR	NPC	6.4645e-15	1.77256
BRD-K59946561	BRD-K59946561	24.4	10um	FDR	NEU.KCL	sirolimus	BRD-A50287119	24.4	10um	FDR	NEU.KCL	7.7398e-15	2.56694
ursolic-acid	BRD-K68185022	24	70.07um	FDR	HT29	sirolimus	BRD-A79768653	24	10um	FDR	HT29	2.95194e-14	2.56735
umbelliferone	BRD-K87991767	6	10um	FDR	HT29	metformin	BRD-K79602928	6	10um	FDR	HT29	3.25924e-14	1.30915
rosiglitazone	BRD-A97437073	6	80um	FDR	HEPG2	sirolimus	BRD-A23770159	6	11.1um	FDR	HEPG2	3.33704e-14	2.40877
cyclosporin-a	BRD-A38030642	6	10um	FDR	A549	sirolimus	BRD-A79768653	6	10um	FDR	A549	4.16041e-14	3.03058
tamoxifen	BRD-K93754473	6	10um	FDR	NPC	sirolimus	BRD-A50287119	6	10um	FDR	NPC	4.24051e-14	1.74662
verrucarin-a	BRD-A26002865	6	10um	FDR	A549	sirolimus	BRD-K84937637	24	10um	FDR	A549	6.80528e-14	1.28388
coumaric-acid	BRD-K96271548	6	10um	FDR	HT29	metformin	BRD-K79602928	6	10um	FDR	HT29	1.15945e-13	1.35634
naringenin	BRD-A94669766	6	10um	FDR	A549	metformin	BRD-K79602928	6	10um	FDR	HT29	1.27217e-13	1.24565
anacardic-acid	BRD-K66989831	6	10um	FDR	NPC	sirolimus	BRD-A50287119	6	10um	FDR	NPC	1.28505e-13	1.94034
geldanamycin	BRD-A19500257	6	10um	FDR	HEPG2	sirolimus	BRD-A79768653	6	10um	FDR	HEPG2	1.33317e-13	3.56801
A-23187	BRD-A19134330	6	10um	FDR	NPC	sirolimus	BRD-A50287119	6	10um	FDR	NPC	1.77386e-13	1.6626
doconexent	BRD-K39965020	6	10um	FDR	NPC	sirolimus	BRD-A50287119	6	10um	FDR	NPC	2.9255e-13	2.19973
capsaicin	BRD-K50590187	24	160um	FDR	A549	sirolimus	BRD-A23770159	24	11.1um	FDR	A549	4.67185e-13	1.13908
parthenolide	BRD-K81651477	24	20um	FDR	HT29	sirolimus	BRD-A79768653	24	10um	FDR	HT29	5.30526e-13	2.74869
cyclosporin-a	BRD-A64290322	6	10um	FDR	HT29	sirolimus	BRD-A79768653	6	10um	FDR	HT29	5.37374e-13	4.35692
anisomycin	BRD-K91370081	24	10um	FDR	A549	sirolimus	BRD-K84937637	24	10um	FDR	A549	6.364e-13	1.29996
cytochalasin-b	BRD-K26664453	24	10um	FDR	HT29	sirolimus	BRD-A79768653	24	10um	FDR	HT29	7.53505e-13	2.65004
forskolin	BRD-A70449690	24	10um	FDR	A549	sirolimus	BRD-A23770159	24	11.1um	FDR	A549	1.01603e-12	1.13631
oligomycin-a	BRD-A81541225	6	10um	FDR	HEPG2	sirolimus	BRD-A23770159	6	11.1um	FDR	HEPG2	1.24466e-12	1.4559
cyclopamine	BRD-K58938839	6	10um	FDR	A549	metformin	BRD-K79602928	6	10um	FDR	HT29	1.42935e-12	1.20955
skimmianine	BRD-K25741894	6	10um	FDR	HT29	metformin	BRD-K79602928	6	10um	FDR	HT29	1.44947e-12	1.27369
cyclosporin-a	BRD-A69815203	6	10um	FDR	HT29	sirolimus	BRD-A79768653	6	10um	FDR	HT29	1.4562e-12	4.62076
fumonisin-b1	BRD-A63646118	6	151.2um	FDR	HEPG2	sirolimus	BRD-A23770159	6	11.1um	FDR	HEPG2	1.86421e-12	1.88137
caffeic-acid-phenethyl-ester	BRD-K96188950	6	17.5867um	FDR	HEPG2	sirolimus	BRD-A79768653	6	10um	FDR	HEPG2	3.01365e-12	3.16673
thiostrepton	BRD-A20697603	6	10um	FDR	HT29	sirolimus	BRD-A79768653	6	10um	FDR	HT29	3.04719e-12	3.84267
narciclasine	BRD-K06792661	6	10um	FDR	HEPG2	sirolimus	BRD-A23770159	6	11.1um	FDR	HEPG2	3.05662e-12	1.30167
rottlerin	BRD-K03816923	6	9.68um	FDR	HEPG2	sirolimus	BRD-A23770159	6	11.1um	FDR	HEPG2	3.84776e-12	1.38592
homoharringtonine	BRD-K76674262	24	10um	FDR	A549	sirolimus	BRD-K84937637	24	10um	FDR	A549	3.96924e-12	1.20051
phenethyl-isothiocyanate	BRD-K56700933	24	10um	FDR	A549	sirolimus	BRD-A23770159	24	11.1um	FDR	A549	4.80532e-12	1.28081
rhodomyrtoxin-b	BRD-A08003242	24	10um	FDR	HT29	sirolimus	BRD-A79768653	6	10um	FDR	HEPG2	5.0935e-12	3.12676
deoxycholic-acid	BRD-K41170226	6	10um	FDR	A549	metformin	BRD-K79602928	6	10um	FDR	HT29	9.29374e-12	1.19428
thapsigargin	BRD-A62809825	6	10um	FDR	A549	sirolimus	BRD-A79768653	6	10um	FDR	A549	9.4075e-12	2.21073
butyrolactone	BRD-K68584490	6.4	10um	FDR	NEU.KCL	sirolimus	BRD-A50287119	6.4	10um	FDR	NEU.KCL	1.09521e-11	1.95798
genistein	BRD-K43797669	6	10um	FDR	A549	metformin	BRD-K79602928	6	10um	FDR	HT29	1.56143e-11	1.21105
rotenone	BRD-K08316444	24	0.63um	FDR	A549	sirolimus	BRD-A23770159	24	11.1um	FDR	A549	1.98866e-11	1.0661
gingerol	BRD-K26117720	24.4	10um	FDR	NEU.KCL	sirolimus	BRD-A50287119	24.4	10um	FDR	NEU.KCL	2.12839e-11	1.64446
chloroquine	BRD-A91699651	24.4	10um	FDR	NEU.KCL	sirolimus	BRD-A50287119	24.4	10um	FDR	NEU.KCL	2.14839e-11	2.12788
geldanamycin	BRD-K11528507	6	10um	FDR	NPC	sirolimus	BRD-A50287119	6	10um	FDR	NPC	2.72804e-11	1.56181
rottlerin	BRD-K03816923	24	9.68um	FDR	HT29	sirolimus	BRD-A79768653	24	10um	FDR	HT29	2.88464e-11	2.21335
ellipticine	BRD-K85985071	6	10um	FDR	A549	metformin	BRD-K79602928	6	10um	FDR	HT29	3.77363e-11	1.14869
taurodeoxycholic-acid	BRD-K33572481	6	10um	FDR	A549	metformin	BRD-K79602928	6	10um	FDR	HT29	3.82261e-11	1.17474
brefeldin-a	BRD-A31107743	6	0.09um	FDR	HEPG2	sirolimus	BRD-A79768653	6	10um	FDR	HEPG2	4.67612e-11	2.97243
gossypol	BRD-K19295594	6	11.1um	FDR	A549	sirolimus	BRD-A79768653	6	10um	FDR	A549	6.52058e-11	2.32598
cyclosporin-a	BRD-A64290322	6	10um	FDR	HEPG2	sirolimus	BRD-A79768653	6	10um	FDR	HEPG2	7.3742e-11	5.27601
cyclosporin-a	BRD-A38030642	6	10um	FDR	HEPG2	sirolimus	BRD-A79768653	6	10um	FDR	HEPG2	8.8104e-11	3.93822
phylloquinone	BRD-A55815733	6	10um	FDR	HT29	metformin	BRD-K79602928	6	10um	FDR	HT29	9.48549e-11	2.77845
phloretin	BRD-K15563106	24	177.6um	FDR	HT29	sirolimus	BRD-A79768653	24	10um	FDR	HT29	9.50248e-11	2.6089
brefeldin-a	BRD-A31107743	24	0.09um	FDR	HT29	sirolimus	BRD-A79768653	6	10um	FDR	HEPG2	9.91719e-11	2.99836
radicicol	BRD-K33551950	6	10um	FDR	HT29	sirolimus	BRD-A79768653	6	10um	FDR	HEPG2	1.12463e-10	3.08096
homoharringtonine	BRD-K76674262	6	10um	FDR	A549	sirolimus	BRD-K84937637	24	10um	FDR	A549	1.14874e-10	1.09808
strophanthidin	BRD-K84595254	24	10um	FDR	A549	sirolimus	BRD-K84937637	24	10um	FDR	A549	1.15703e-10	1.17469
forskolin	BRD-K77830450	24.4	10um	FDR	NEU.KCL	sirolimus	BRD-A50287119	24.4	10um	FDR	NEU.KCL	1.17713e-10	2.98343
cyclosporin-a	BRD-A64290322	6	10um	FDR	HT29	sirolimus	BRD-A79768653	6	10um	FDR	HEPG2	1.52011e-10	3.85015
alimemazine	BRD-A49225603	24	10um	FDR	HT29	sirolimus	BRD-A79768653	6	10um	FDR	HT29	1.74149e-10	3.5629
cyclosporin-a	BRD-A38030642	24	10um	FDR	HT29	sirolimus	BRD-A79768653	24	10um	FDR	HT29	2.95631e-10	2.24072
brefeldin-a	BRD-A31107743	24	0.09um	FDR	HT29	sirolimus	BRD-A79768653	24	10um	FDR	HT29	3.21009e-10	2.04155
cyclosporin-a	BRD-A38030642	24	10um	FDR	HT29	sirolimus	BRD-A79768653	6	10um	FDR	HT29	3.25073e-10	3.01899
tamoxifen	BRD-K93754473	24	28.39um	FDR	HT29	sirolimus	BRD-A79768653	6	10um	FDR	HT29	3.61353e-10	2.98634
piperlongumine	BRD-K24132293	6	10um	FDR	A549	sirolimus	BRD-A79768653	6	10um	FDR	A549	3.94724e-10	2.20061
thapsigargin	BRD-K69023402	24.4	10um	FDR	NEU.KCL	sirolimus	BRD-A50287119	24.4	10um	FDR	NEU.KCL	4.01215e-10	1.70624
cyclosporin-a	BRD-A69815203	6	10um	FDR	HT29	sirolimus	BRD-A79768653	6	10um	FDR	HEPG2	4.2364e-10	4.07754
piceatannol	BRD-K91509126	24.4	10um	FDR	NEU.KCL	sirolimus	BRD-A50287119	24.4	10um	FDR	NEU.KCL	4.67197e-10	1.78024
emetine	BRD-A25687296	24	10um	FDR	A549	sirolimus	BRD-K84937637	24	10um	FDR	A549	4.93845e-10	1.07338
trichostatin-a	BRD-K68202742	24.4	10um	FDR	NEU.KCL	sirolimus	BRD-A50287119	24.4	10um	FDR	NEU.KCL	5.17903e-10	1.59078
ursolic-acid	BRD-K68185022	24	70.07um	FDR	HT29	sirolimus	BRD-A79768653	6	10um	FDR	HEPG2	5.69082e-10	2.74917
sulforaphane	BRD-A58955223	24	10um	FDR	HT29	sirolimus	BRD-A79768653	24	10um	FDR	HT29	6.45609e-10	3.43757
cyclosporin-a	BRD-A38030642	6	10um	FDR	HT29	sirolimus	BRD-A79768653	6	10um	FDR	HEPG2	6.46545e-10	3.36214
trichostatin-a	BRD-A19037878	24.4	10um	FDR	NEU.KCL	sirolimus	BRD-A50287119	24.4	10um	FDR	NEU.KCL	7.26558e-10	1.50361
apicidin	BRD-A63989068	24.4	10um	FDR	NEU.KCL	sirolimus	BRD-A50287119	24.4	10um	FDR	NEU.KCL	7.3931e-10	1.5352
lasalocid	BRD-A72711497	24	10um	FDR	HT29	sirolimus	BRD-A79768653	6	10um	FDR	HT29	7.42315e-10	3.08274
rotenonic-acid	BRD-K34330170	6	10um	FDR	HT29	metformin	BRD-K79602928	6	10um	FDR	HT29	7.6095e-10	1.08389
brefeldin-a	BRD-A17065207	6	10um	FDR	HEPG2	sirolimus	BRD-A79768653	6	10um	FDR	HEPG2	7.8431e-10	5.7589
rhodomyrtoxin-b	BRD-A08003242	24	10um	FDR	HT29	sirolimus	BRD-A79768653	6	10um	FDR	HT29	8.12637e-10	2.93309
staurosporine	BRD-K17953061	6	10um	FDR	HT29	metformin	BRD-K79602928	6	10um	FDR	HT29	8.30826e-10	1.06289
brefeldin-a	BRD-A84228258	24.4	10um	FDR	NEU.KCL	sirolimus	BRD-A50287119	24.4	10um	FDR	NEU.KCL	9.22784e-10	1.68677
BRD-K84924563	BRD-K84924563	24	40um	FDR	A549	sirolimus	BRD-A23770159	24	11.1um	FDR	A549	9.51602e-10	0.962356
BRD-A62200266	BRD-A62200266	24	10um	FDR	A549	sirolimus	BRD-K89626439	24	10um	FDR	A549	9.88051e-10	2.02349
camptothecin	BRD-K37890730	6	1.1111um	FDR	A549	sirolimus	BRD-K84937637	6	10um	FDR	A549	1.20852e-09	1.92744
brefeldin-a	BRD-A17065207	6	10um	FDR	A549	sirolimus	BRD-A79768653	6	10um	FDR	HEPG2	1.24808e-09	3.27661
rottlerin	BRD-K03816923	24	10um	FDR	A549	sirolimus	BRD-K84937637	6	10um	FDR	A549	1.45254e-09	2.16545
cyclosporin-a	BRD-K13533483	6	10um	FDR	A549	sirolimus	BRD-A79768653	6	10um	FDR	HEPG2	1.50502e-09	3.49651
piceatannol	BRD-K91509126	6	10um	FDR	NPC	sirolimus	BRD-A79768653	6	10um	FDR	HEPG2	1.50996e-09	2.75284
epoxycholesterol	BRD-K61480498	24	10um	FDR	A549	sirolimus	BRD-A79768653	24	10um	FDR	A549	1.55933e-09	3.36242
caffeic-acid-phenethyl-ester	BRD-K96188950	6	17.5867um	FDR	HEPG2	sirolimus	BRD-A79768653	6	10um	FDR	HT29	1.66726e-09	2.91935
radicicol	BRD-K33551950	6	10um	FDR	A549	metformin	BRD-K79602928	6	10um	FDR	HT29	1.70349e-09	1.0305
hippeastrine	BRD-K71003802	6	10um	FDR	HT29	metformin	BRD-K79602928	6	10um	FDR	HT29	2.00363e-09	1.10886
dihydrocapsaicin	BRD-K45882009	6.4	10um	FDR	NEU.KCL	sirolimus	BRD-A50287119	6.4	10um	FDR	NEU.KCL	2.03747e-09	2.172
cyclosporin-a	BRD-A69815203	6	10um	FDR	A549	sirolimus	BRD-A79768653	6	10um	FDR	HT29	2.22812e-09	4.2153
cerulenin	BRD-K52075040	6	44.4um	FDR	HEPG2	sirolimus	BRD-A23770159	6	11.1um	FDR	HEPG2	2.22856e-09	1.44195
trichostatin-a	BRD-K68202742	6.4	10um	FDR	NEU.KCL	sirolimus	BRD-A50287119	6.4	10um	FDR	NEU.KCL	2.24496e-09	1.6408
HO-013	BRD-K86465814	6	10um	FDR	A549	metformin	BRD-K79602928	6	10um	FDR	HT29	2.31647e-09	1.12796
caffeic-acid	BRD-K84709232	6	10um	FDR	HT29	metformin	BRD-K79602928	6	10um	FDR	HT29	2.37524e-09	1.17301
thapsigargin	BRD-K69023402	24	10um	FDR	HT29	sirolimus	BRD-A79768653	6	10um	FDR	HEPG2	2.64175e-09	2.76488
thapsigargin	BRD-A62809825	6	10um	FDR	A549	sirolimus	BRD-K84937637	6	10um	FDR	A549	2.67333e-09	1.96483
cyclosporin-a	BRD-A69815203	6	10um	FDR	HT29	sirolimus	BRD-K84937637	6	10um	FDR	HT29	3.55388e-09	6.07743
norepinephrine	BRD-A91555231	6	10um	FDR	HT29	metformin	BRD-K79602928	6	10um	FDR	HT29	3.66744e-09	3.15751
cyclosporin-a	BRD-A38030642	6	10um	FDR	HT29	sirolimus	BRD-A79768653	6	10um	FDR	HT29	4.0462e-09	3.37052
oligomycin-c	BRD-K05350981	6	10um	FDR	A549	sirolimus	BRD-A79768653	6	10um	FDR	HT29	4.19533e-09	3.65232
cyclosporin-a	BRD-A38030642	24	10um	FDR	HT29	sirolimus	BRD-A79768653	6	10um	FDR	HEPG2	4.23017e-09	2.65886
cyclosporin-a	BRD-A38030642	6	10um	FDR	A549	sirolimus	BRD-A79768653	6	10um	FDR	HT29	4.76268e-09	3.14446
thapsigargin	BRD-A62809825	6	10um	FDR	A549	sirolimus	BRD-A79768653	6	10um	FDR	HEPG2	4.84857e-09	2.57346
thapsigargin	BRD-A62809825	24	10um	FDR	HT29	sirolimus	BRD-A79768653	6	10um	FDR	HEPG2	5.17886e-09	3.62397
BRD-A62200266	BRD-A62200266	24	10um	FDR	A549	metformin	BRD-K79602928	6	10um	FDR	HT29	5.82974e-09	0.98402
staurosporine	BRD-K17953061	24	10um	FDR	A549	metformin	BRD-K79602928	6	10um	FDR	HT29	5.87022e-09	1.06386
penitrem-a	BRD-K03842655	6	10um	FDR	HT29	sirolimus	BRD-K84937637	6	10um	FDR	HT29	5.9681e-09	6.87523
geldanamycin	BRD-A19500257	6.4	10um	FDR	NEU.KCL	sirolimus	BRD-A50287119	24.4	10um	FDR	NEU.KCL	6.76479e-09	1.89438
nelfinavir	BRD-K60460488	6	10um	FDR	A549	metformin	BRD-K79602928	6	10um	FDR	HT29	6.80319e-09	1.1636
ursolic-acid	BRD-K68185022	24	70.07um	FDR	HT29	sirolimus	BRD-A79768653	6	10um	FDR	HT29	7.71409e-09	2.732
cephaeline	BRD-K80348542	24	10um	FDR	A549	sirolimus	BRD-K84937637	24	10um	FDR	A549	8.75326e-09	1.01098
paroxetine	BRD-K37991163	6	10um	FDR	HT29	sirolimus	BRD-A79768653	6	10um	FDR	HT29	9.13798e-09	4.55493
geldanamycin	BRD-A19500257	6	10um	FDR	HT29	sirolimus	BRD-A79768653	6	10um	FDR	HEPG2	9.63032e-09	2.53422
betulinic-acid	BRD-K45401373	6	10um	FDR	HT29	metformin	BRD-K79602928	6	10um	FDR	HT29	1.04869e-08	1.08921
phloretin	BRD-K15563106	6	177.6um	FDR	HEPG2	sirolimus	BRD-A23770159	6	11.1um	FDR	HEPG2	1.04933e-08	1.17454
narciclasine	BRD-K06792661	24	10um	FDR	A549	sirolimus	BRD-A23770159	24	11.1um	FDR	A549	1.06459e-08	0.911646
ursolic-acid	BRD-K68185022	6	70.07um	FDR	A549	sirolimus	BRD-A79768653	6	10um	FDR	A549	1.28595e-08	1.99821
ouabain	BRD-A46747628	24	10um	FDR	NPC	sirolimus	BRD-A79768653	24	10um	FDR	A549	1.32369e-08	3.18469
emetine	BRD-K03067624	24	10um	FDR	A549	sirolimus	BRD-K84937637	24	10um	FDR	A549	1.35304e-08	0.969885
cyclosporin-a	BRD-A38030642	24	10um	FDR	A549	sirolimus	BRD-A79768653	24	10um	FDR	A549	1.45007e-08	3.18386
emetine	BRD-K03067624	24	10um	FDR	HT29	sirolimus	BRD-K84937637	24	10um	FDR	A549	1.47211e-08	0.969414
nelfinavir	BRD-K60460488	6	10um	FDR	A549	sirolimus	BRD-A50287119	6	10um	FDR	NPC	1.50937e-08	1.39227
equilin	BRD-A88080608	6	10um	FDR	A549	metformin	BRD-K79602928	6	10um	FDR	HT29	1.51418e-08	0.982457
cyclosporin-a	BRD-A64290322	6	10um	FDR	HT29	sirolimus	BRD-K84937637	6	10um	FDR	HT29	1.64846e-08	5.69751
penitrem-a	BRD-K03842655	6	10um	FDR	HT29	sirolimus	BRD-A79768653	6	10um	FDR	HT29	1.64846e-08	5.69751
emetine	BRD-A25687296	6	10um	FDR	A549	sirolimus	BRD-K84937637	24	10um	FDR	A549	1.68958e-08	0.972843
brefeldin-a	BRD-A31107743	6	0.09um	FDR	HEPG2	sirolimus	BRD-A23770159	6	11.1um	FDR	HEPG2	1.69839e-08	1.18791
radicicol	BRD-K33551950	6	10um	FDR	HEPG2	sirolimus	BRD-A79768653	6	10um	FDR	HEPG2	1.89312e-08	2.92929
endecaphyllin-x	BRD-K54728231	24	10um	FDR	A549	sirolimus	BRD-K89626439	24	10um	FDR	A549	1.96405e-08	2.31663
verrucarin-a	BRD-A26002865	24	10um	FDR	NPC	sirolimus	BRD-K84937637	24	10um	FDR	NPC	2.06976e-08	2.0608
BRD-K84571636	BRD-K84571636	6	10um	FDR	A549	metformin	BRD-K79602928	6	10um	FDR	HT29	2.09505e-08	1.1583
piceatannol	BRD-K91509126	6	10um	FDR	NPC	sirolimus	BRD-A79768653	6	10um	FDR	A549	2.23738e-08	2.00637
alimemazine	BRD-A49225603	24	10um	FDR	HT29	sirolimus	BRD-A79768653	6	10um	FDR	HEPG2	2.25349e-08	3.10225
myriocin	BRD-A76279427	6	10um	FDR	HEPG2	metformin	BRD-K79602928	6	10um	FDR	HT29	2.38241e-08	1.24607
cyclosporin-a	BRD-A38030642	6	10um	FDR	A549	sirolimus	BRD-K84937637	6	10um	FDR	A549	2.41085e-08	2.40288
BRD-K84571636	BRD-K84571636	24	10um	FDR	A549	metformin	BRD-K79602928	6	10um	FDR	HT29	2.68515e-08	1.18163
pterostilbene	BRD-K92870997	24	10um	FDR	NPC	sirolimus	BRD-A50287119	24	10um	FDR	NPC	2.78348e-08	2.67141
daunorubicin	BRD-K43389675	24	10um	FDR	A549	metformin	BRD-K79602928	6	10um	FDR	HT29	2.92905e-08	0.939019
tropisetron	BRD-K50866992	6	10um	FDR	A549	sirolimus	BRD-A79768653	6	10um	FDR	A549	3.03186e-08	2.50728
cyclosporin-a	BRD-A69815203	6	10um	FDR	A549	sirolimus	BRD-A79768653	6	10um	FDR	A549	3.19033e-08	3.47881
penitrem-a	BRD-K03842655	6	10um	FDR	HT29	sirolimus	BRD-A79768653	6	10um	FDR	HEPG2	3.43423e-08	5.52251
celastrol	BRD-A80960055	6	10um	FDR	A549	metformin	BRD-K79602928	6	10um	FDR	HT29	3.68541e-08	0.92512
lovastatin	BRD-A70155556	24	40um	FDR	HT29	sirolimus	BRD-A79768653	24	10um	FDR	HT29	3.74017e-08	3.40906
menadione	BRD-K78126613	6	10um	FDR	HEPG2	sirolimus	BRD-A79768653	6	10um	FDR	A549	3.84098e-08	2.82994
ouabain	BRD-K35708212	24	10um	FDR	NPC	sirolimus	BRD-K84937637	24	10um	FDR	A549	4.06951e-08	0.960401
rottlerin	BRD-K03816923	6	10um	FDR	NPC	sirolimus	BRD-A50287119	6	10um	FDR	NPC	4.15302e-08	1.72255
verrucarin-a	BRD-A26002865	24	10um	FDR	NPC	sirolimus	BRD-K84937637	24	10um	FDR	A549	4.16786e-08	1.10435
butein	BRD-K17497770	6	10um	FDR	HEPG2	sirolimus	BRD-A79768653	6	10um	FDR	HEPG2	4.42886e-08	3.25596
rosiglitazone	BRD-A97437073	24	80um	FDR	HT29	sirolimus	BRD-A79768653	24	10um	FDR	HT29	4.43849e-08	2.61011
doxorubicin	BRD-A76941896	24	10um	FDR	HT29	metformin	BRD-K79602928	6	10um	FDR	HT29	4.64965e-08	0.934277
cyclosporin-a	BRD-A38030642	6	10um	FDR	HEPG2	sirolimus	BRD-A79768653	6	10um	FDR	HT29	4.66044e-08	3.58991
brefeldin-a	BRD-A84228258	6	10um	FDR	NPC	sirolimus	BRD-A50287119	6	10um	FDR	NPC	4.67362e-08	1.66943
thapsigargin	BRD-A62809825	6	10um	FDR	A549	sirolimus	BRD-A79768653	6	10um	FDR	HT29	4.95251e-08	2.55892
cyclosporin-a	BRD-A64290322	6	10um	FDR	HEPG2	sirolimus	BRD-K84937637	6	10um	FDR	HT29	4.98843e-08	5.95584
camptothecin	BRD-K37890730	6	1.1111um	FDR	A549	sirolimus	BRD-K84937637	6	0.0412um	FDR	A549	5.0494e-08	2.33207
lasalocid	BRD-A72711497	24	10um	FDR	HT29	sirolimus	BRD-K84937637	6	10um	FDR	A549	5.15446e-08	2.13439
thiostrepton	BRD-A20697603	6	10um	FDR	A549	sirolimus	BRD-A79768653	6	10um	FDR	A549	5.35035e-08	4.93699
apigenin	BRD-K01493881	6	10um	FDR	A549	metformin	BRD-K79602928	6	10um	FDR	HT29	5.41705e-08	0.921552
thiostrepton	BRD-A20697603	6	10um	FDR	A549	sirolimus	BRD-A79768653	6	10um	FDR	HT29	5.69034e-08	5.00332
menadione	BRD-K78126613	24	10um	FDR	NPC	sirolimus	BRD-A79768653	24	10um	FDR	A549	6.92317e-08	2.94022
alimemazine	BRD-A49225603	24	10um	FDR	HT29	sirolimus	BRD-K84937637	6	10um	FDR	A549	7.48534e-08	2.54728
thapsigargin	BRD-A62809825	24	10um	FDR	HT29	sirolimus	BRD-A79768653	24	10um	FDR	HT29	7.87681e-08	1.83482
brefeldin-a	BRD-A17065207	6	10um	FDR	HT29	sirolimus	BRD-K84937637	6	10um	FDR	A549	7.89517e-08	1.74287
A-23187	BRD-A19134330	6	10um	FDR	NPC	metformin	BRD-K79602928	6	10um	FDR	HT29	8.02028e-08	0.897557
thapsigargin	BRD-A62809825	24	10um	FDR	HT29	sirolimus	BRD-A79768653	6	10um	FDR	HT29	8.18896e-08	3.47596
tretinoin	BRD-K64634304	6	40um	FDR	HEPG2	sirolimus	BRD-A23770159	6	11.1um	FDR	HEPG2	8.19445e-08	1.23815
retinyl	BRD-K65331431	6	10um	FDR	A549	sirolimus	BRD-K99369265	6	10um	FDR	A549	8.23104e-08	2.2828
dihydroergocristine	BRD-K97440753	6	10um	FDR	HT29	metformin	BRD-K79602928	6	10um	FDR	HT29	8.62679e-08	1.00251
rottlerin	BRD-K03816923	24	9.68um	FDR	HT29	sirolimus	BRD-A79768653	6	10um	FDR	HT29	8.67449e-08	2.50583
retinol	BRD-K22429181	6.4	10um	FDR	NEU.KCL	sirolimus	BRD-A50287119	6.4	10um	FDR	NEU.KCL	9.15596e-08	1.6175
rottlerin	BRD-K03816923	6	10um	FDR	HEPG2	sirolimus	BRD-A79768653	6	10um	FDR	A549	9.3412e-08	3.72693
piperlongumine	BRD-K24132293	6	10um	FDR	HT29	sirolimus	BRD-A79768653	6	10um	FDR	A549	9.47792e-08	1.77402
thapsigargin	BRD-K69023402	24	10um	FDR	HT29	sirolimus	BRD-K84937637	6	10um	FDR	A549	9.56918e-08	1.67204
riboflavin	BRD-K92760278	6	10um	FDR	A549	metformin	BRD-K79602928	6	10um	FDR	HT29	1.0066e-07	1.11538
rhodomyrtoxin-b	BRD-A08003242	24	10um	FDR	HT29	sirolimus	BRD-K84937637	6	10um	FDR	A549	1.0398e-07	1.74731
narciclasine	BRD-K06792661	24	10um	FDR	HT29	sirolimus	BRD-K84937637	24	10um	FDR	A549	1.04024e-07	0.918076
thapsigargin	BRD-K69023402	24	10um	FDR	HT29	sirolimus	BRD-A79768653	6	10um	FDR	HT29	1.07376e-07	2.58929
piceatannol	BRD-K91509126	6	10um	FDR	NPC	sirolimus	BRD-K84937637	6	10um	FDR	A549	1.09755e-07	1.93579
tamoxifen	BRD-K93754473	24	28.39um	FDR	HT29	sirolimus	BRD-A79768653	24	10um	FDR	HT29	1.11069e-07	1.85308
ouabain	BRD-A46747628	24	10um	FDR	A549	sirolimus	BRD-K84937637	24	10um	FDR	A549	1.24123e-07	0.924214
capsaicin	BRD-K50590187	24	160um	FDR	HT29	sirolimus	BRD-A79768653	24	10um	FDR	HT29	1.32049e-07	3.58599
anisomycin	BRD-K91370081	6	10um	FDR	HT29	sirolimus	BRD-K84937637	24	10um	FDR	A549	1.34513e-07	0.901549
rottlerin	BRD-K03816923	24	10um	FDR	A549	sirolimus	BRD-A79768653	6	10um	FDR	A549	1.35366e-07	1.91412
hydrocortisone	BRD-A25143711	24	10um	FDR	A549	sirolimus	BRD-A79768653	24	10um	FDR	A549	1.35418e-07	3.01399
cytochalasin-b	BRD-K26664453	6	10um	FDR	A549	sirolimus	BRD-A23770159	6	11.1um	FDR	A549	1.35844e-07	3.0905
oligomycin-a	BRD-K74133369	6	10um	FDR	HEPG2	sirolimus	BRD-A79768653	6	10um	FDR	A549	1.37395e-07	2.04095
camptothecin	BRD-K37890730	6	1.1111um	FDR	A549	sirolimus	BRD-K84937637	6	0.0137um	FDR	A549	1.40384e-07	1.68369
hinokitiol	BRD-K37691127	24	10um	FDR	A549	sirolimus	BRD-K84937637	6	0.3704um	FDR	A549	1.43698e-07	4.46382
rottlerin	BRD-K03816923	24	10um	FDR	A549	sirolimus	BRD-A79768653	24	10um	FDR	A549	1.54931e-07	2.89516
xanthohumol	BRD-K77390737	6	10um	FDR	HEPG2	sirolimus	BRD-A79768653	6	10um	FDR	HT29	1.59276e-07	Inf
cyclosporin-a	BRD-A64290322	6	10um	FDR	A549	sirolimus	BRD-K84937637	6	10um	FDR	A549	1.63238e-07	2.61844
thiostrepton	BRD-A20697603	6	10um	FDR	HEPG2	sirolimus	BRD-A79768653	6	10um	FDR	A549	1.68675e-07	2.02179
plumbagin	BRD-K36137799	24.4	10um	FDR	NEU.KCL	sirolimus	BRD-A50287119	24.4	10um	FDR	NEU.KCL	1.71486e-07	1.29891
brefeldin-a	BRD-A17065207	6	10um	FDR	A549	sirolimus	BRD-A79768653	6	10um	FDR	HT29	1.73948e-07	3.05169
radicicol	BRD-K33551950	24	10um	FDR	NPC	sirolimus	BRD-K84937637	24	10um	FDR	NPC	1.812e-07	1.88858
gossypol	BRD-K19295594	6	11.1um	FDR	HEPG2	sirolimus	BRD-A23770159	6	11.1um	FDR	HEPG2	1.83159e-07	1.14856
arctigenin	BRD-K53523901	6	10um	FDR	HT29	metformin	BRD-K79602928	6	10um	FDR	HT29	1.87664e-07	1.13854
cyclosporin-a	BRD-A38030642	6	10um	FDR	HT29	sirolimus	BRD-K84937637	6	10um	FDR	HT29	1.90257e-07	5.12524
cyclosporin-a	BRD-A38030642	24	10um	FDR	A549	sirolimus	BRD-A79768653	6	10um	FDR	HEPG2	1.91122e-07	2.51442
BRD-K85853281	BRD-K85853281	6	10um	FDR	HEPG2	metformin	BRD-K79602928	6	10um	FDR	HT29	1.98005e-07	0.884271
oligomycin-a	BRD-A81541225	6	10um	FDR	A549	sirolimus	BRD-A79768653	6	10um	FDR	A549	2.04748e-07	2.58917
alimemazine	BRD-A49225603	24	10um	FDR	HT29	sirolimus	BRD-K84937637	6	10um	FDR	HT29	2.22863e-07	5.08909
pidorubicine	BRD-K04548931	6	10um	FDR	A549	metformin	BRD-K79602928	6	10um	FDR	HT29	2.23177e-07	0.972643
prostaglandin-b2	BRD-K82865713	6	10um	FDR	HT29	metformin	BRD-K79602928	6	10um	FDR	HT29	2.28612e-07	0.945217
brefeldin-a	BRD-A17065207	24	10um	FDR	A549	sirolimus	BRD-K84937637	6	10um	FDR	A549	2.31661e-07	1.62064
parthenolide	BRD-K98548675	24	10um	FDR	NPC	sirolimus	BRD-A50287119	24.4	10um	FDR	NEU.KCL	2.35841e-07	1.39578
thapsigargin	BRD-A62809825	6	10um	FDR	HT29	sirolimus	BRD-K84937637	6	10um	FDR	A549	2.36077e-07	1.78159
cyclosporin-a	BRD-A69815203	6	10um	FDR	HT29	sirolimus	BRD-K84937637	6	10um	FDR	HEPG2	2.39782e-07	5.76728
retinyl	BRD-K65331431	6	10um	FDR	A549	sirolimus	BRD-A79768653	6	10um	FDR	A549	2.46271e-07	1.73619
phloretin	BRD-K15563106	24	177.6um	FDR	A549	sirolimus	BRD-A23770159	24	11.1um	FDR	A549	2.4697e-07	0.813168
lovastatin	BRD-A70155556	6	40um	FDR	HEPG2	sirolimus	BRD-A23770159	6	11.1um	FDR	HEPG2	2.50817e-07	1.0945
ouabain	BRD-A68930007	24	10um	FDR	A549	sirolimus	BRD-K84937637	24	10um	FDR	A549	2.64512e-07	1.07523
parthenolide	BRD-K81651477	6	20um	FDR	HEPG2	sirolimus	BRD-A23770159	6	11.1um	FDR	HEPG2	2.69307e-07	1.07372
puromycin	BRD-K36007650	6	10um	FDR	HT29	metformin	BRD-K79602928	6	10um	FDR	HT29	2.78767e-07	0.919106
xanthohumol	BRD-K77390737	6	10um	FDR	HEPG2	sirolimus	BRD-A79768653	6	10um	FDR	HEPG2	2.82784e-07	Inf
cyclosporin-a	BRD-A69815203	6	10um	FDR	A549	sirolimus	BRD-A79768653	6	10um	FDR	HEPG2	3.00671e-07	3.67207
piceatannol	BRD-K91509126	6	10um	FDR	HEPG2	sirolimus	BRD-A79768653	6	10um	FDR	HEPG2	3.10154e-07	4.4218
cyclosporin-a	BRD-A64290322	6	10um	FDR	HEPG2	sirolimus	BRD-A79768653	6	10um	FDR	HT29	3.32097e-07	4.30807
cymarin	BRD-A71459254	24	10um	FDR	NPC	sirolimus	BRD-K84937637	24	10um	FDR	A549	3.476e-07	0.986764
cyclosporin-a	BRD-A38030642	24	10um	FDR	HT29	sirolimus	BRD-K84937637	6	10um	FDR	A549	3.4824e-07	1.83835
ivermectin	BRD-A48570745	24	10um	FDR	A549	sirolimus	BRD-A79768653	6	10um	FDR	HT29	3.48367e-07	2.94309
geldanamycin	BRD-A19500257	6	10um	FDR	NPC	sirolimus	BRD-A79768653	6	10um	FDR	HEPG2	3.49778e-07	2.24451
cephaeline	BRD-K80348542	6	10um	FDR	A549	sirolimus	BRD-K84937637	24	10um	FDR	A549	3.52808e-07	0.944269
penitrem-a	BRD-K03842655	24	10um	FDR	NPC	sirolimus	BRD-A79768653	6	10um	FDR	HEPG2	3.5428e-07	2.91993
cyclosporin-a	BRD-K13533483	6	10um	FDR	A549	sirolimus	BRD-A79768653	6	10um	FDR	HT29	3.66088e-07	3.20403
anisomycin	BRD-K91370081	6	10um	FDR	A549	sirolimus	BRD-K84937637	24	10um	FDR	A549	3.70223e-07	0.92994
antimycin-a	BRD-A52886023	6	10um	FDR	A549	metformin	BRD-K79602928	6	10um	FDR	HT29	3.80238e-07	0.991362
geldanamycin	BRD-A19500257	6	10um	FDR	A549	sirolimus	BRD-A79768653	6	10um	FDR	HEPG2	3.85009e-07	2.2352
paxilline	BRD-K38251852	6	10um	FDR	NPC	sirolimus	BRD-A50287119	6	10um	FDR	NPC	3.87433e-07	1.89615
cyclosporin-a	BRD-A38030642	6	10um	FDR	A549	sirolimus	BRD-A79768653	6	10um	FDR	HEPG2	3.98183e-07	2.69718
oligomycin-c	BRD-K05350981	6	10um	FDR	A549	sirolimus	BRD-A79768653	6	10um	FDR	HEPG2	4.03887e-07	3.18172
nelfinavir	BRD-K60460488	6	10um	FDR	A549	sirolimus	BRD-K84937637	6	10um	FDR	A549	4.05151e-07	1.67588
A-23187	BRD-K41431477	6	2.5um	FDR	HEPG2	sirolimus	BRD-A79768653	6	10um	FDR	HEPG2	4.12348e-07	2.28238
thiostrepton	BRD-A20697603	6	10um	FDR	HT29	sirolimus	BRD-A79768653	24	10um	FDR	HT29	4.1398e-07	2.48403
tamoxifen	BRD-K93754473	24	28.39um	FDR	HT29	sirolimus	BRD-A79768653	6	10um	FDR	A549	4.14704e-07	1.73168
narciclasine	BRD-K06792661	24	10um	FDR	A549	sirolimus	BRD-K84937637	24	10um	FDR	A549	4.27236e-07	0.881626
capsaicin	BRD-K50590187	6	160um	FDR	A549	sirolimus	BRD-A79768653	6	10um	FDR	A549	4.52084e-07	3.3193
scopolamine	BRD-K89923877	6	10um	FDR	A549	sirolimus	BRD-A79768653	6	10um	FDR	A549	4.52084e-07	3.3193
verrucarin-a	BRD-A26002865	6	10um	FDR	HEPG2	sirolimus	BRD-K84937637	24	10um	FDR	A549	4.75211e-07	1.15408
etoposide	BRD-K37798499	24	10um	FDR	A549	sirolimus	BRD-A79768653	24	10um	FDR	A549	4.77613e-07	2.98919
myriocin	BRD-A76279427	6	10um	FDR	HEPG2	sirolimus	BRD-A23770159	6	11.1um	FDR	HEPG2	4.8977e-07	1.21644
fillalbin	BRD-K28667196	6	10um	FDR	HT29	metformin	BRD-K79602928	6	10um	FDR	HT29	4.98113e-07	1.04953
cyclosporin-a	BRD-A38030642	24	10um	FDR	HT29	sirolimus	BRD-A79768653	6	10um	FDR	A549	5.06925e-07	1.80208
anisomycin	BRD-K82261406	6	10um	FDR	NPC	sirolimus	BRD-A50287119	6	10um	FDR	NPC	5.33726e-07	1.11541
staurosporine	BRD-K17953061	6.4	10um	FDR	NEU.KCL	sirolimus	BRD-A50287119	6.4	10um	FDR	NEU.KCL	5.49548e-07	1.61202
epigallocatechin	BRD-K19216856	6	88.8um	FDR	HEPG2	sirolimus	BRD-A23770159	6	11.1um	FDR	HEPG2	5.58539e-07	0.970454
brefeldin-a	BRD-A17065207	6	10um	FDR	HT29	sirolimus	BRD-A79768653	6	10um	FDR	HEPG2	5.66303e-07	2.17156
prostaglandin-a1	BRD-K04010869	6	1um	FDR	HEPG2	metformin	BRD-K79602928	6	10um	FDR	HT29	5.79614e-07	1.30733
piperlongumine	BRD-K24132293	24	10um	FDR	HT29	sirolimus	BRD-A79768653	24	10um	FDR	HT29	6.09048e-07	1.66267
nelfinavir	BRD-K60460488	6	10um	FDR	A549	sirolimus	BRD-A79768653	6	10um	FDR	A549	6.4639e-07	1.63381
amoxicillin	BRD-K55044200	6	10um	FDR	A549	sirolimus	BRD-A79768653	6	10um	FDR	HT29	6.55057e-07	4.08387
withaferin-a	BRD-A52193669	24	10um	FDR	A549	sirolimus	BRD-K84937637	24	10um	FDR	A549	6.97697e-07	0.854291
paroxetine	BRD-K37991163	24	10um	FDR	NPC	sirolimus	BRD-A50287119	6	10um	FDR	NPC	7.26284e-07	2.90881
cyclosporin-a	BRD-A64290322	6	10um	FDR	HT29	sirolimus	BRD-K84937637	6	10um	FDR	HEPG2	7.85235e-07	5.41374
chaetocin	BRD-A85860691	24	0.08um	FDR	HT29	sirolimus	BRD-A79768653	24	10um	FDR	HT29	7.85604e-07	1.57709
rottlerin	BRD-K03816923	24.4	10um	FDR	NEU.KCL	sirolimus	BRD-A50287119	24.4	10um	FDR	NEU.KCL	7.88934e-07	1.53831
cyclosporin-a	BRD-A64290322	6	10um	FDR	A549	sirolimus	BRD-A79768653	6	10um	FDR	HT29	8.35639e-07	3.05422
phenethyl-isothiocyanate	BRD-K56700933	6	10um	FDR	HEPG2	sirolimus	BRD-A23770159	6	11.1um	FDR	HEPG2	8.47167e-07	1.22145
thapsigargin	BRD-A62809825	6	10um	FDR	HT29	sirolimus	BRD-A79768653	6	10um	FDR	HT29	8.74394e-07	2.33685
cyclosporin-a	BRD-K13533483	6	10um	FDR	A549	sirolimus	BRD-A79768653	6	10um	FDR	A549	8.86584e-07	2.56983
ouabain	BRD-A46747628	6	10um	FDR	A549	sirolimus	BRD-A79768653	6	10um	FDR	A549	9.05067e-07	2.11443
reserpine	BRD-K95921201	6	10um	FDR	HT29	sirolimus	BRD-A79768653	6	10um	FDR	A549	9.31253e-07	1.74972
ouabain	BRD-A46747628	24	10um	FDR	A549	metformin	BRD-K79602928	6	10um	FDR	HT29	9.42946e-07	0.845316
cyclosporin-a	BRD-A38030642	24	10um	FDR	HT29	sirolimus	BRD-K84937637	6	10um	FDR	HT29	9.4786e-07	Inf
rottlerin	BRD-K03816923	24	9.68um	FDR	HT29	sirolimus	BRD-A79768653	6	10um	FDR	HEPG2	9.62569e-07	2.14549
radicicol	BRD-K33551950	6	10um	FDR	HEPG2	sirolimus	BRD-K84937637	6	10um	FDR	HT29	9.69069e-07	4.75574
parthenolide	BRD-K98548675	6	10um	FDR	HT29	sirolimus	BRD-A79768653	24	10um	FDR	HT29	9.71294e-07	2.78352
brefeldin-a	BRD-A31107743	24	0.09um	FDR	HT29	sirolimus	BRD-A79768653	6	10um	FDR	HT29	1.00193e-06	2.27661
podophyllotoxin	BRD-K47869605	24	10um	FDR	NPC	sirolimus	BRD-A50287119	24.4	10um	FDR	NEU.KCL	1.03924e-06	1.21238
aminolevulinic-acid	BRD-K57631554	6	10um	FDR	A549	sirolimus	BRD-A79768653	6	10um	FDR	HT29	1.0464e-06	3.36677
epothilone-a	BRD-K71823332	24	10um	FDR	NPC	metformin	BRD-K79602928	6	10um	FDR	HT29	1.06151e-06	0.924228
cyclosporin-a	BRD-A38030642	6	10um	FDR	A549	sirolimus	BRD-K84937637	6	10um	FDR	HT29	1.08628e-06	4.72997
lasalocid	BRD-A72711497	24	10um	FDR	HT29	sirolimus	BRD-A79768653	6	10um	FDR	HEPG2	1.08665e-06	2.4173
geldanamycin	BRD-K11528507	6	10um	FDR	NPC	sirolimus	BRD-A79768653	6	10um	FDR	HT29	1.08842e-06	2.25923
brefeldin-a	BRD-A31107743	6	0.09um	FDR	A549	sirolimus	BRD-K89626439	6	10um	FDR	A549	1.08898e-06	Inf
thapsigargin	BRD-A62809825	24	10um	FDR	A549	sirolimus	BRD-A79768653	6	10um	FDR	HEPG2	1.1844e-06	2.13652
cyclosporin-a	BRD-A69815203	24	10um	FDR	A549	sirolimus	BRD-A79768653	6	10um	FDR	HT29	1.18441e-06	3.9005
idarubicin	BRD-A71390734	6	0.08um	FDR	HEPG2	sirolimus	BRD-A23770159	6	11.1um	FDR	HEPG2	1.2272e-06	1.02511
alimemazine	BRD-A49225603	24	10um	FDR	HT29	sirolimus	BRD-K89626439	6	10um	FDR	A549	1.23418e-06	Inf
cephaeline	BRD-K80348542	6	10um	FDR	HT29	sirolimus	BRD-K84937637	24	10um	FDR	A549	1.23731e-06	0.826474
narciclasine	BRD-K06792661	6	10um	FDR	HT29	sirolimus	BRD-K84937637	24	10um	FDR	A549	1.25621e-06	0.834789
paroxetine	BRD-K37991163	6	10um	FDR	HT29	sirolimus	BRD-K84937637	6	10um	FDR	A549	1.25747e-06	3.57386
piceatannol	BRD-K91509126	6	10um	FDR	NPC	sirolimus	BRD-A50287119	6	10um	FDR	NPC	1.27935e-06	1.3966
cymarin	BRD-A71459254	6	10um	FDR	A549	sirolimus	BRD-A79768653	6	10um	FDR	A549	1.2872e-06	1.82979
penitrem-a	BRD-K03842655	6	10um	FDR	HT29	sirolimus	BRD-K84937637	6	10um	FDR	HEPG2	1.28871e-06	6.18208
parthenolide	BRD-K98548675	24	10um	FDR	NPC	sirolimus	BRD-A79768653	24	10um	FDR	A549	1.32789e-06	2.59857
staurosporine	BRD-K17953061	6	10um	FDR	HEPG2	metformin	BRD-K79602928	6	10um	FDR	HT29	1.35276e-06	0.913025
ouabain	BRD-A46747628	24	10um	FDR	NPC	sirolimus	BRD-K84937637	24	10um	FDR	A549	1.38337e-06	0.979982
brefeldin-a	BRD-A17065207	6	10um	FDR	A549	sirolimus	BRD-K89626439	6	10um	FDR	A549	1.39343e-06	Inf
radicicol	BRD-K33551950	6	10um	FDR	HEPG2	sirolimus	BRD-A79768653	6	10um	FDR	HT29	1.4086e-06	2.72577
ouabain	BRD-A68930007	24	10um	FDR	NPC	sirolimus	BRD-K84937637	24	10um	FDR	A549	1.40888e-06	0.839061
hydroxycholesterol	BRD-A36707673	6	10um	FDR	A549	metformin	BRD-K79602928	6	10um	FDR	HT29	1.41901e-06	1.89689
gingerol	BRD-K26117720	24.4	10um	FDR	NEU.KCL	sirolimus	BRD-K84937637	24	10um	FDR	A549	1.42467e-06	0.87664
thapsigargin	BRD-K69023402	24.4	10um	FDR	NEU.KCL	sirolimus	BRD-A79768653	6	10um	FDR	HEPG2	1.47206e-06	2.14209
cyclosporin-a	BRD-A38030642	24	10um	FDR	A549	sirolimus	BRD-A79768653	6	10um	FDR	A549	1.48065e-06	1.88367
geldanamycin	BRD-K11528507	6	10um	FDR	NPC	sirolimus	BRD-A79768653	6	10um	FDR	HEPG2	1.48099e-06	2.08046
yohimbine	BRD-A51410489	24	10um	FDR	NPC	sirolimus	BRD-A50287119	6	10um	FDR	NPC	1.51181e-06	1.53208
verrucarin-a	BRD-A26002865	6	10um	FDR	HEPG2	sirolimus	BRD-K84937637	6	10um	FDR	A549	1.52088e-06	1.71143
brefeldin-a	BRD-A17065207	6	10um	FDR	A549	sirolimus	BRD-A79768653	6	10um	FDR	A549	1.52157e-06	2.30813
puromycin	BRD-K36007650	6	10um	FDR	A549	sirolimus	BRD-A79768653	6	10um	FDR	A549	1.55518e-06	1.95768
dihydrocapsaicin	BRD-K45882009	24.4	10um	FDR	NEU.KCL	sirolimus	BRD-A50287119	24.4	10um	FDR	NEU.KCL	1.56405e-06	2.09357
ursolic-acid	BRD-K68185022	24	70.07um	FDR	HT29	sirolimus	BRD-A50287119	24.4	10um	FDR	NEU.KCL	1.72031e-06	1.35712
cycloheximide	BRD-A62184259	6	10um	FDR	A549	sirolimus	BRD-K84937637	24	10um	FDR	A549	1.77499e-06	0.863631
oligomycin-a	BRD-K74133369	24	10um	FDR	A549	sirolimus	BRD-A79768653	24	10um	FDR	A549	1.83094e-06	2.58676
ellipticine	BRD-K85985071	24	10um	FDR	A549	sirolimus	BRD-K84937637	24	10um	FDR	A549	1.83472e-06	1.03599
westcort	BRD-A23290232	6	10um	FDR	HT29	sirolimus	BRD-K84937637	6	10um	FDR	A549	1.86213e-06	1.86269
cyclosporin-a	BRD-A38030642	6	10um	FDR	HEPG2	sirolimus	BRD-K84937637	6	10um	FDR	HT29	1.88345e-06	4.78122
estradiol	BRD-A18917088	24	10um	FDR	NPC	sirolimus	BRD-A50287119	6	10um	FDR	NPC	2.05785e-06	3.55421
troglitazone	BRD-A13084692	24	10um	FDR	A549	sirolimus	BRD-A23770159	24	11.1um	FDR	A549	2.14329e-06	0.773483
brefeldin-a	BRD-A31107743	6	0.09um	FDR	A549	sirolimus	BRD-A79768653	6	10um	FDR	HT29	2.17189e-06	2.88287
epigallocatechin	BRD-K19216856	24	88.8um	FDR	A549	sirolimus	BRD-A23770159	24	11.1um	FDR	A549	2.24214e-06	1.0614
cyclosporin-a	BRD-K13533483	6	10um	FDR	HT29	sirolimus	BRD-K84937637	6	10um	FDR	HEPG2	2.25176e-06	5.89337
ingenol	BRD-A52650764	6	10um	FDR	A549	sirolimus	BRD-A79768653	6	10um	FDR	A549	2.30644e-06	1.56368
cyclosporin-a	BRD-A64290322	6	10um	FDR	A549	sirolimus	BRD-A79768653	6	10um	FDR	HEPG2	2.3407e-06	2.85684
staurosporine	BRD-K17953061	6	10um	FDR	A549	metformin	BRD-K79602928	6	10um	FDR	HT29	2.34241e-06	0.792122
cyclosporin-a	BRD-A69815203	24	10um	FDR	A549	sirolimus	BRD-A79768653	6	10um	FDR	HEPG2	2.43543e-06	3.72548
ursolic-acid	BRD-K68185022	6	70.07um	FDR	A549	sirolimus	BRD-K84937637	6	10um	FDR	A549	2.45602e-06	1.71618
rosiglitazone	BRD-A97437073	24	80um	FDR	A549	sirolimus	BRD-A79768653	24	10um	FDR	A549	2.49781e-06	2.52306
tacrolimus	BRD-K44094599	6	10um	FDR	A549	sirolimus	BRD-A79768653	6	10um	FDR	A549	2.5554e-06	2.40402
cymarin	BRD-A71459254	24	10um	FDR	A549	sirolimus	BRD-K84937637	24	10um	FDR	A549	2.58208e-06	0.878045
rotenone	BRD-K08316444	6	0.63um	FDR	HEPG2	sirolimus	BRD-A23770159	6	11.1um	FDR	HEPG2	2.5951e-06	0.997516
hinokitiol	BRD-K37691127	24	10um	FDR	A549	sirolimus	BRD-A79768653	6	10um	FDR	A549	2.7059e-06	2.91058
tretinoin	BRD-K64634304	24	40um	FDR	HT29	sirolimus	BRD-A79768653	24	10um	FDR	HT29	2.74749e-06	2.88744
ingenol	BRD-A52650764	24	10um	FDR	HT29	sirolimus	BRD-A79768653	24	10um	FDR	HT29	2.78572e-06	1.98749
rosiglitazone	BRD-A97437073	24	80um	FDR	A549	sirolimus	BRD-K84937637	6	10um	FDR	A549	2.93319e-06	1.55118
bufalin	BRD-K63606607	6	10um	FDR	A549	sirolimus	BRD-A79768653	6	10um	FDR	A549	2.96414e-06	2.08402
cephaeline	BRD-K80348542	24	10um	FDR	NPC	sirolimus	BRD-K84937637	24	10um	FDR	A549	2.99348e-06	0.827821
narciclasine	BRD-K06792661	6	10um	FDR	A549	sirolimus	BRD-A79768653	6	10um	FDR	A549	3.09935e-06	1.45942
geldanamycin	BRD-A19500257	6	10um	FDR	A549	sirolimus	BRD-A79768653	6	10um	FDR	A549	3.18168e-06	1.56775
staurosporine	BRD-K17953061	6.4	10um	FDR	NEU.KCL	sirolimus	BRD-A50287119	24.4	10um	FDR	NEU.KCL	3.19856e-06	1.72925
bufalin	BRD-K63606607	24	10um	FDR	A549	sirolimus	BRD-K84937637	24	10um	FDR	A549	3.20432e-06	1.03718
thapsigargin	BRD-A62809825	6	10um	FDR	HT29	sirolimus	BRD-K84937637	6	10um	FDR	HT29	3.25108e-06	Inf
tamoxifen	BRD-K93754473	24	28.39um	FDR	HT29	sirolimus	BRD-K84937637	6	10um	FDR	HT29	3.41924e-06	Inf
oligomycin-c	BRD-K05350981	6	10um	FDR	A549	sirolimus	BRD-K84937637	6	10um	FDR	HT29	3.4251e-06	4.60622
brefeldin-a	BRD-A17065207	6	10um	FDR	HT29	sirolimus	BRD-A79768653	6	10um	FDR	A549	3.45478e-06	1.50645
pterostilbene	BRD-K92870997	24	10um	FDR	NPC	sirolimus	BRD-A79768653	24	10um	FDR	HT29	3.52029e-06	2.34881
idarubicin	BRD-K69650333	6	10um	FDR	A549	metformin	BRD-K79602928	6	10um	FDR	HT29	3.73187e-06	0.805889
ursolic-acid	BRD-K68185022	24	70.07um	FDR	A549	sirolimus	BRD-A23770159	24	11.1um	FDR	A549	3.73707e-06	0.729926
cyclosporin-a	BRD-A38030642	24	10um	FDR	NPC	sirolimus	BRD-K84937637	24	10um	FDR	NPC	3.75698e-06	1.65615
idarubicin	BRD-A71390734	24	0.08um	FDR	A549	sirolimus	BRD-K84937637	24	10um	FDR	NPC	3.90624e-06	1.65984
rottlerin	BRD-K03816923	24	10um	FDR	A549	sirolimus	BRD-K84937637	24	10um	FDR	A549	4.13826e-06	1.15505
cyclosporin-a	BRD-A69815203	24	10um	FDR	A549	sirolimus	BRD-K89626439	6	10um	FDR	A549	4.24615e-06	5.89026
thapsigargin	BRD-A62809825	6	10um	FDR	HEPG2	sirolimus	BRD-A23770159	6	11.1um	FDR	HEPG2	4.35384e-06	0.858633
idarubicin	BRD-A71390734	6	0.08um	FDR	A549	sirolimus	BRD-K84937637	24	10um	FDR	NPC	4.44346e-06	1.9634
narciclasine	BRD-K06792661	6	10um	FDR	HEPG2	sirolimus	BRD-K84937637	24	10um	FDR	A549	4.45901e-06	0.794781
brefeldin-a	BRD-A17065207	6	10um	FDR	HEPG2	sirolimus	BRD-K84937637	6	10um	FDR	HT29	4.48963e-06	5.48687
cyclosporin-a	BRD-K13533483	6	10um	FDR	HT29	sirolimus	BRD-K84937637	6	10um	FDR	HT29	4.48963e-06	5.48687
thiostrepton	BRD-A20697603	6	10um	FDR	A549	sirolimus	BRD-K89626439	6	10um	FDR	HT29	4.48963e-06	5.48687
brefeldin-a	BRD-A31107743	6	0.09um	FDR	HEPG2	sirolimus	BRD-K84937637	6	10um	FDR	A549	4.52546e-06	1.49276
lasalocid	BRD-A72711497	24	10um	FDR	HT29	sirolimus	BRD-A50287119	24.4	10um	FDR	NEU.KCL	4.58235e-06	1.5709
rottlerin	BRD-K03816923	24	10um	FDR	A549	sirolimus	BRD-A79768653	6	10um	FDR	HT29	4.58724e-06	2.28332
estrone	BRD-K81839095	6	10um	FDR	HT29	metformin	BRD-K79602928	6	10um	FDR	HT29	4.66993e-06	0.875044
epoxycholesterol	BRD-K61480498	6	10um	FDR	A549	sirolimus	BRD-A79768653	6	10um	FDR	A549	4.68405e-06	2.02622
rottlerin	BRD-K03816923	6	9.68um	FDR	A549	sirolimus	BRD-A79768653	6	10um	FDR	A549	4.79693e-06	1.83533
geldanamycin	BRD-A19500257	6	10um	FDR	HT29	sirolimus	BRD-A79768653	6	10um	FDR	HT29	4.88667e-06	2.10583
staurosporine	BRD-K17953061	6	10um	FDR	HEPG2	sirolimus	BRD-A79768653	6	10um	FDR	A549	4.93534e-06	1.44095
thapsigargin	BRD-K69023402	24	10um	FDR	HT29	sirolimus	BRD-A79768653	6	10um	FDR	A549	5.00797e-06	1.42213
ellipticine	BRD-K85985071	24	10um	FDR	A549	sirolimus	BRD-A79768653	24	10um	FDR	A549	5.03834e-06	2.45674
radicicol	BRD-K33551950	6	10um	FDR	HT29	sirolimus	BRD-K84937637	6	10um	FDR	HT29	5.05509e-06	4.38312
westcort	BRD-A23290232	6	10um	FDR	HT29	sirolimus	BRD-K84937637	6	0.0412um	FDR	A549	5.08097e-06	2.20686
piceatannol	BRD-K91509126	6	10um	FDR	NPC	sirolimus	BRD-A79768653	6	10um	FDR	HT29	5.08945e-06	2.26991
capsaicin	BRD-K50590187	6	160um	FDR	HEPG2	sirolimus	BRD-A23770159	6	11.1um	FDR	HEPG2	5.13341e-06	2.30346
bafilomycin	BRD-A56798952	24.4	10um	FDR	NEU.KCL	metformin	BRD-K79602928	6	10um	FDR	HT29	5.27076e-06	0.797184
thapsigargin	BRD-A62809825	6	10um	FDR	A549	sirolimus	BRD-A23770159	6	11.1um	FDR	A549	5.30276e-06	2.13553
cyclosporin-a	BRD-A38030642	6	10um	FDR	HT29	sirolimus	BRD-K84937637	6	10um	FDR	HEPG2	5.31495e-06	4.867
brefeldin-a	BRD-A17065207	6	10um	FDR	HEPG2	sirolimus	BRD-A79768653	6	10um	FDR	HT29	5.34385e-06	4.31303
cyclosporin-a	BRD-K13533483	6	10um	FDR	HT29	sirolimus	BRD-A79768653	6	10um	FDR	HT29	5.34385e-06	4.31303
oligomycin-c	BRD-K05350981	6	10um	FDR	HT29	sirolimus	BRD-A79768653	6	10um	FDR	HT29	5.34385e-06	4.31303
cyclosporin-a	BRD-A64290322	6	10um	FDR	HEPG2	sirolimus	BRD-K84937637	6	10um	FDR	HEPG2	5.38753e-06	5.48583
idarubicin	BRD-A71390734	24	0.08um	FDR	A549	sirolimus	BRD-A23770159	24	11.1um	FDR	A549	5.50297e-06	0.7342
ochratoxin-a	BRD-K39944607	24	10um	FDR	A549	sirolimus	BRD-A79768653	24	10um	FDR	A549	5.61133e-06	2.78451
cyclosporin-a	BRD-A38030642	24	10um	FDR	A549	sirolimus	BRD-A79768653	6	10um	FDR	HT29	5.67045e-06	2.36265
cyclosporin-a	BRD-K13533483	6	10um	FDR	A549	sirolimus	BRD-K84937637	6	10um	FDR	HT29	5.75367e-06	4.45646
flavokavain-b	BRD-K30296925	6	10um	FDR	HT29	metformin	BRD-K79602928	6	10um	FDR	HT29	5.79424e-06	0.870599
ingenol	BRD-A52650764	6	10um	FDR	HEPG2	sirolimus	BRD-A23770159	6	11.1um	FDR	HEPG2	5.95075e-06	0.879468
rhodomyrtoxin-b	BRD-A08003242	24	10um	FDR	HT29	sirolimus	BRD-A79768653	24	10um	FDR	HT29	5.96122e-06	1.53458
tropisetron	BRD-K50866992	6	10um	FDR	A549	sirolimus	BRD-A79768653	6	10um	FDR	HT29	6.01293e-06	2.70158
brefeldin-a	BRD-A31107743	6	0.09um	FDR	A549	sirolimus	BRD-A79768653	6	10um	FDR	HEPG2	6.01647e-06	2.68547
thiostrepton	BRD-A20697603	6	10um	FDR	HT29	sirolimus	BRD-A79768653	6	10um	FDR	HEPG2	6.01647e-06	2.68547
narciclasine	BRD-K06792661	6	10um	FDR	A549	sirolimus	BRD-K84937637	6	10um	FDR	A549	6.10967e-06	1.42055
AICA-ribonucleotide	BRD-A67373739	24	10um	FDR	HT29	sirolimus	BRD-A23770159	24	11.1um	FDR	HT29	6.30517e-06	Inf
BRD-K59946561	BRD-K59946561	6	10um	FDR	HEPG2	sirolimus	BRD-K99369265	6	10um	FDR	HEPG2	6.30517e-06	Inf
cholic-acid	BRD-K43164539	6	10um	FDR	HEPG2	sirolimus	BRD-K99369265	6	10um	FDR	HEPG2	6.30517e-06	Inf
deoxycholic-acid	BRD-K41170226	6	10um	FDR	HEPG2	sirolimus	BRD-K99369265	6	10um	FDR	HEPG2	6.30517e-06	Inf
glycodeoxycholic-acid	BRD-K68144790	6	10um	FDR	HEPG2	sirolimus	BRD-K99369265	6	10um	FDR	HEPG2	6.30517e-06	Inf
HO-013	BRD-K86465814	6	10um	FDR	HEPG2	sirolimus	BRD-K99369265	6	10um	FDR	HEPG2	6.30517e-06	Inf
menadione	BRD-K78126613	24	10um	FDR	HT29	sirolimus	BRD-A23770159	24	11.1um	FDR	HT29	6.30517e-06	Inf
NU-1025	BRD-K48692744	24	10um	FDR	HT29	sirolimus	BRD-A23770159	24	11.1um	FDR	HT29	6.30517e-06	Inf
pregnenolone	BRD-K43880410	6	10um	FDR	HEPG2	sirolimus	BRD-K99369265	6	10um	FDR	HEPG2	6.30517e-06	Inf
resveratrol	BRD-K80738081	24	10um	FDR	HT29	sirolimus	BRD-A23770159	24	11.1um	FDR	HT29	6.30517e-06	Inf
taurocholic-acid	BRD-K81062487	6	10um	FDR	HEPG2	sirolimus	BRD-K99369265	6	10um	FDR	HEPG2	6.30517e-06	Inf
camptothecin	BRD-K37890730	6	0.0412um	FDR	A549	sirolimus	BRD-K84937637	6	0.0137um	FDR	A549	6.40058e-06	1.88934
geranylgeraniol	BRD-K95402279	24.4	10um	FDR	NEU.KCL	metformin	BRD-K79602928	6	10um	FDR	HT29	6.63418e-06	1.02866
parthenolide	BRD-K98548675	24	10um	FDR	HT29	sirolimus	BRD-A79768653	24	10um	FDR	HT29	6.68078e-06	3.70842
brefeldin-a	BRD-A31107743	24	0.09um	FDR	HT29	sirolimus	BRD-K84937637	6	10um	FDR	A549	6.85393e-06	1.42538
piceatannol	BRD-K91509126	6	10um	FDR	NPC	sirolimus	BRD-K99369265	6	10um	FDR	A549	6.87537e-06	2.06274
daunorubicin	BRD-K43389675	6	10um	FDR	HEPG2	sirolimus	BRD-A79768653	6	10um	FDR	A549	6.90539e-06	1.43225
phloretin	BRD-K15563106	24	177.6um	FDR	HT29	sirolimus	BRD-A79768653	6	10um	FDR	HT29	7.02821e-06	2.47559
cyclosporin-a	BRD-A38030642	6	10um	FDR	HT29	sirolimus	BRD-K84937637	6	10um	FDR	A549	7.02937e-06	2.24579
A-23187	BRD-K41431477	6	10um	FDR	HEPG2	sirolimus	BRD-A79768653	6	10um	FDR	HEPG2	7.10289e-06	1.97408
rhodomyrtoxin-b	BRD-A08003242	6	10um	FDR	A549	sirolimus	BRD-K84937637	6	10um	FDR	A549	7.23615e-06	1.61572
capsaicin	BRD-K50590187	6	160um	FDR	A549	sirolimus	BRD-K89626439	6	10um	FDR	A549	7.34858e-06	5.66504
lasalocid	BRD-A72711497	24	10um	FDR	HT29	sirolimus	BRD-K84937637	6	10um	FDR	HT29	7.51044e-06	4.29355
BRD-A30083233	BRD-A30083233	6	10um	FDR	A549	metformin	BRD-K79602928	6	10um	FDR	HT29	7.69766e-06	0.902061
oligomycin-a	BRD-A81541225	6	10um	FDR	HEPG2	sirolimus	BRD-A79768653	6	10um	FDR	HEPG2	8.19722e-06	1.92837
cyclosporin-a	BRD-A38030642	6	10um	FDR	HT29	sirolimus	BRD-A79768653	6	10um	FDR	A549	8.53907e-06	2.21729
cyclosporin-a	BRD-A38030642	24	10um	FDR	HT29	sirolimus	BRD-K84937637	24	10um	FDR	NPC	8.54974e-06	1.81835
piperlongumine	BRD-K24132293	24	10um	FDR	NPC	metformin	BRD-K79602928	6	10um	FDR	HT29	8.58355e-06	0.737039
cyclosporin-a	BRD-A69815203	6	10um	FDR	HEPG2	sirolimus	BRD-A79768653	6	10um	FDR	HT29	8.60973e-06	Inf
lasalocid	BRD-K10207760	6	10um	FDR	HT29	sirolimus	BRD-A79768653	6	10um	FDR	HT29	8.60973e-06	Inf
tacrolimus	BRD-K69608737	6	10um	FDR	HT29	sirolimus	BRD-A79768653	6	10um	FDR	HT29	8.60973e-06	Inf
thapsigargin	BRD-A62809825	6	10um	FDR	A549	sirolimus	BRD-K84937637	6	10um	FDR	HT29	8.65443e-06	Inf
strophanthidin	BRD-K84595254	6	10um	FDR	A549	sirolimus	BRD-A79768653	6	10um	FDR	A549	8.91627e-06	1.84778
tamoxifen	BRD-K93754473	24	28.39um	FDR	HT29	sirolimus	BRD-A23770159	6	11.1um	FDR	A549	8.95871e-06	2.12393
rhodomyrtoxin-b	BRD-A08003242	24	10um	FDR	HT29	sirolimus	BRD-A50287119	24	10um	FDR	NPC	9.0578e-06	1.49251
cyclosporin-a	BRD-A64290322	6	10um	FDR	A549	sirolimus	BRD-K84937637	6	10um	FDR	HT29	9.09494e-06	4.32546
cycloheximide	BRD-A62184259	24	10um	FDR	NPC	sirolimus	BRD-K84937637	24	10um	FDR	NPC	9.18773e-06	1.59897
geldanamycin	BRD-A19500257	6	10um	FDR	NPC	sirolimus	BRD-K84937637	6	10um	FDR	A549	9.27082e-06	1.51491
cyclosporin-a	BRD-A69815203	6	10um	FDR	A549	sirolimus	BRD-K89626439	6	10um	FDR	A549	9.34547e-06	5.56869
brefeldin-a	BRD-A31107743	6	0.09um	FDR	HT29	sirolimus	BRD-A79768653	6	10um	FDR	HEPG2	9.4166e-06	4.14736
cyclosporin-a	BRD-K13533483	6	10um	FDR	HT29	sirolimus	BRD-A79768653	6	10um	FDR	HEPG2	9.4166e-06	4.14736
oligomycin-c	BRD-K05350981	6	10um	FDR	HT29	sirolimus	BRD-A79768653	6	10um	FDR	HEPG2	9.4166e-06	4.14736
parthenolide	BRD-A66395008	6	10um	FDR	HEPG2	sirolimus	BRD-A79768653	6	10um	FDR	HEPG2	9.4166e-06	4.14736
withaferin-a	BRD-A52193669	6	10um	FDR	A549	sirolimus	BRD-K84937637	24	10um	FDR	A549	9.99202e-06	0.749908
rhodomyrtoxin-b	BRD-A08003242	6	10um	FDR	A549	sirolimus	BRD-A79768653	6	10um	FDR	A549	1.0078e-05	1.58062
daunorubicin	BRD-A68009927	6	10um	FDR	HEPG2	sirolimus	BRD-A79768653	6	10um	FDR	A549	1.01357e-05	1.53812
thapsigargin	BRD-A62809825	6	10um	FDR	HT29	sirolimus	BRD-A79768653	6	10um	FDR	A549	1.01357e-05	1.53812
rosiglitazone	BRD-A97437073	6	80um	FDR	HT29	sirolimus	BRD-A79768653	6	10um	FDR	HT29	1.0538e-05	4.0243
hydrocortisone	BRD-A65767837	6	10um	FDR	A549	sirolimus	BRD-A79768653	6	10um	FDR	A549	1.08131e-05	2.36712
latrunculin-b	BRD-A19248578	6	10um	FDR	A549	sirolimus	BRD-A79768653	6	10um	FDR	A549	1.08131e-05	2.36712
narciclasine	BRD-K06792661	6	10um	FDR	A549	sirolimus	BRD-K84937637	24	10um	FDR	A549	1.08383e-05	0.767136
BRD-K65411918	BRD-K65411918	6	10um	FDR	A549	metformin	BRD-K79602928	6	10um	FDR	HT29	1.10351e-05	1.18922
triptolide	BRD-K39484304	6	10um	FDR	HT29	sirolimus	BRD-A79768653	6	10um	FDR	A549	1.1139e-05	1.74259
rottlerin	BRD-K03816923	24	9.68um	FDR	HT29	sirolimus	BRD-K84937637	6	10um	FDR	HT29	1.11426e-05	Inf
rotenone	BRD-K08316444	6	0.1563um	FDR	HEPG2	sirolimus	BRD-A79768653	6	10um	FDR	HEPG2	1.12045e-05	1.92491
alimemazine	BRD-A49225603	24	10um	FDR	HT29	sirolimus	BRD-A79768653	6	10um	FDR	A549	1.12079e-05	2.17537
geldanamycin	BRD-K11528507	6	10um	FDR	NPC	sirolimus	BRD-A79768653	6	10um	FDR	A549	1.14123e-05	1.41204
rottlerin	BRD-K03816923	24	10um	FDR	NPC	sirolimus	BRD-A50287119	6	10um	FDR	NPC	1.1677e-05	1.11304
doxorubicin	BRD-A52530684	6	10um	FDR	HEPG2	sirolimus	BRD-K84937637	6	10um	FDR	A549	1.19156e-05	1.39783
tamoxifen	BRD-K93754473	24	28.39um	FDR	HT29	sirolimus	BRD-A23770159	6	11.1um	FDR	HEPG2	1.20443e-05	1.0434
graveoline	BRD-K92683369	6	10um	FDR	HT29	sirolimus	BRD-A23770159	6	11.1um	FDR	HEPG2	1.22845e-05	1.10496
cycloheximide	BRD-A62184259	6	10um	FDR	A549	sirolimus	BRD-A79768653	6	10um	FDR	A549	1.23075e-05	1.35794
cyclosporin-a	BRD-A69815203	6	10um	FDR	HEPG2	sirolimus	BRD-A79768653	6	10um	FDR	HEPG2	1.31023e-05	Inf
cyclosporin-a	BRD-K13533483	6	10um	FDR	HEPG2	sirolimus	BRD-A79768653	6	10um	FDR	HEPG2	1.31023e-05	Inf
strophanthidin	BRD-K84595254	24	10um	FDR	NPC	sirolimus	BRD-K84937637	24	10um	FDR	A549	1.31676e-05	0.843302
geldanamycin	BRD-A19500257	6	10um	FDR	NPC	sirolimus	BRD-A79768653	6	10um	FDR	A549	1.34123e-05	1.47731
doxorubicin	BRD-A52530684	24	10um	FDR	A549	metformin	BRD-K79602928	6	10um	FDR	HT29	1.34326e-05	0.721245
cyclopamine	BRD-K58938839	6	10um	FDR	A549	sirolimus	BRD-K84937637	24	10um	FDR	A549	1.34479e-05	0.765228
thapsigargin	BRD-A62809825	24	10um	FDR	HT29	sirolimus	BRD-K84937637	6	10um	FDR	A549	1.40194e-05	1.39389
cyclosporin-a	BRD-A69815203	6	10um	FDR	HT29	sirolimus	BRD-K89626439	6	10um	FDR	A549	1.43553e-05	5.39955
puromycin	BRD-K36007650	6	10um	FDR	HT29	sirolimus	BRD-K84937637	24	10um	FDR	A549	1.4358e-05	0.79613
cyclosporin-a	BRD-A64290322	6	10um	FDR	HT29	sirolimus	BRD-A79768653	24	10um	FDR	HT29	1.43852e-05	2.54662
tamoxifen	BRD-K93754473	6	28.39um	FDR	A549	sirolimus	BRD-A79768653	6	10um	FDR	HT29	1.4596e-05	3.20101
reserpine	BRD-K95921201	6	10um	FDR	HT29	sirolimus	BRD-A79768653	6	10um	FDR	HT29	1.47147e-05	2.13135
rhodomyrtoxin-b	BRD-A08003242	24	10um	FDR	HT29	sirolimus	BRD-K84937637	6	10um	FDR	HT29	1.47722e-05	Inf
cymarin	BRD-A71459254	24	10um	FDR	NPC	sirolimus	BRD-A79768653	24	10um	FDR	A549	1.48628e-05	2.30339
trichostatin-a	BRD-K68202742	6	10um	FDR	NPC	sirolimus	BRD-A79768653	6	10um	FDR	HT29	1.55444e-05	2.12284
brefeldin-a	BRD-A31107743	6	0.09um	FDR	A549	sirolimus	BRD-K84937637	6	10um	FDR	HT29	1.55643e-05	4.17279
thiostrepton	BRD-A20697603	6	10um	FDR	HT29	sirolimus	BRD-K84937637	6	10um	FDR	HT29	1.55643e-05	4.17279
thiostrepton	BRD-A20697603	6	10um	FDR	HT29	sirolimus	BRD-K89626439	6	10um	FDR	HT29	1.55643e-05	4.17279
thapsigargin	BRD-K69023402	24	10um	FDR	HT29	sirolimus	BRD-A79768653	24	10um	FDR	HT29	1.57605e-05	1.38582
oligomycin-a	BRD-A81541225	6	10um	FDR	A549	sirolimus	BRD-A23770159	6	11.1um	FDR	A549	1.60084e-05	2.78555
tacrolimus	BRD-K44094599	6	10um	FDR	A549	sirolimus	BRD-A79768653	6	10um	FDR	HT29	1.60084e-05	2.78555
camptothecin	BRD-K37890730	6	0.0015um	FDR	A549	sirolimus	BRD-K84937637	6	0.0137um	FDR	A549	1.63479e-05	3.39261
BRD-K59460069	BRD-K59460069	6	10um	FDR	HEPG2	sirolimus	BRD-A79768653	6	10um	FDR	HEPG2	1.65497e-05	2.17064
oligomycin-a	BRD-K74133369	6	10um	FDR	HEPG2	sirolimus	BRD-A79768653	6	10um	FDR	HEPG2	1.65497e-05	2.17064
mitomycin-c	BRD-A48237631	6	10um	FDR	HEPG2	sirolimus	BRD-A50287119	24.4	10um	FDR	NEU.KCL	1.67546e-05	1.26741
verrucarin-a	BRD-A26002865	6	10um	FDR	HT29	sirolimus	BRD-K84937637	24	10um	FDR	A549	1.7183e-05	0.855659
latrunculin-b	BRD-A19248578	24	10um	FDR	A549	sirolimus	BRD-K89626439	24	10um	FDR	A549	1.73342e-05	1.53684
tamoxifen	BRD-K93754473	6	28.39um	FDR	A549	sirolimus	BRD-K89626439	6	10um	FDR	A549	1.74179e-05	5.3244
estrone	BRD-K81839095	6	10um	FDR	NPC	sirolimus	BRD-A50287119	6	10um	FDR	NPC	1.74759e-05	3.38876
hydroxycholesterol	BRD-K35307346	24	10um	FDR	NPC	sirolimus	BRD-A79768653	6	10um	FDR	HT29	1.75915e-05	2.10775
alimemazine	BRD-A49225603	24	10um	FDR	HT29	sirolimus	BRD-K89626439	6	10um	FDR	HT29	1.76099e-05	4.13783
anisomycin	BRD-K91370081	6	10um	FDR	A549	sirolimus	BRD-A79768653	6	10um	FDR	A549	1.80949e-05	1.34393
plumbagin	BRD-K36137799	6	10um	FDR	NPC	metformin	BRD-K79602928	6	10um	FDR	HT29	1.83401e-05	0.717347
ouabain	BRD-A46747628	24	10um	FDR	NPC	sirolimus	BRD-K84937637	24	10um	FDR	NPC	1.83873e-05	1.60273
trichostatin-a	BRD-A19037878	24	10um	FDR	HEPG2	metformin	BRD-K79602928	6	10um	FDR	HT29	1.84414e-05	0.723737
tetramethylsilane	BRD-K45988865	6	10um	FDR	HT29	metformin	BRD-K79602928	6	10um	FDR	HT29	1.8602e-05	0.890392
triptolide	BRD-K39484304	6	10um	FDR	A549	metformin	BRD-K79602928	6	10um	FDR	HT29	1.86842e-05	0.722156
doxorubicin	BRD-A52530684	6	10um	FDR	HEPG2	sirolimus	BRD-A79768653	6	10um	FDR	A549	1.87174e-05	1.35394
androstenedione	BRD-K32610195	6	10um	FDR	HEPG2	sirolimus	BRD-K99369265	6	10um	FDR	HEPG2	1.89026e-05	7.5725
prostaglandin	BRD-K09436313	6	10um	FDR	HEPG2	sirolimus	BRD-K99369265	6	10um	FDR	HEPG2	1.89026e-05	7.5725
valproic-acid	BRD-K41260949	24	10um	FDR	HT29	sirolimus	BRD-A23770159	24	11.1um	FDR	HT29	1.89026e-05	7.5725
brefeldin-a	BRD-A31107743	24	0.09um	FDR	A549	sirolimus	BRD-A23770159	24	11.1um	FDR	A549	1.90633e-05	0.668737
radicicol	BRD-K33551950	6	10um	FDR	HEPG2	sirolimus	BRD-K84937637	6	10um	FDR	HEPG2	1.91566e-05	4.50791
withaferin-a	BRD-A52193669	6	10um	FDR	HT29	sirolimus	BRD-A79768653	6	10um	FDR	HT29	1.92053e-05	2.09611
cycloheximide	BRD-A62184259	24	10um	FDR	A549	sirolimus	BRD-K84937637	24	10um	FDR	A549	1.96619e-05	0.817803
disulfiram	BRD-K32744045	6	10um	FDR	HT29	sirolimus	BRD-A79768653	24	10um	FDR	HT29	1.96971e-05	1.6249
brefeldin-a	BRD-A17065207	6	10um	FDR	A549	sirolimus	BRD-K84937637	6	10um	FDR	HT29	1.98486e-05	4.10398
lasalocid	BRD-A72711497	24	10um	FDR	A549	sirolimus	BRD-A79768653	6	10um	FDR	HT29	1.99307e-05	3.11991
rhodomyrtoxin-b	BRD-A08003242	24	10um	FDR	A549	sirolimus	BRD-A79768653	6	10um	FDR	A549	2.00253e-05	2.25957
camptothecin	BRD-K37890730	6	0.3704um	FDR	A549	sirolimus	BRD-K84937637	6	0.0137um	FDR	A549	2.01998e-05	1.38066
lasalocid	BRD-A72711497	24	10um	FDR	HT29	sirolimus	BRD-K89626439	6	10um	FDR	A549	2.03979e-05	Inf
daunorubicin	BRD-K43389675	6	10um	FDR	HT29	sirolimus	BRD-A79768653	6	10um	FDR	A549	2.04113e-05	1.34701
geldanamycin	BRD-A19500257	6	10um	FDR	HT29	sirolimus	BRD-A79768653	6	10um	FDR	A549	2.04113e-05	1.34701
cyclosporin-a	BRD-A69815203	24	10um	FDR	A549	sirolimus	BRD-K84937637	6	10um	FDR	HT29	2.09696e-05	4.78957
ingenol	BRD-A52650764	24	10um	FDR	A549	sirolimus	BRD-A23770159	24	11.1um	FDR	A549	2.11046e-05	0.709697
pravastatin	BRD-A11170096	6	10um	FDR	HT29	sirolimus	BRD-K84937637	6	0.0137um	FDR	A549	2.1456e-05	1.47839
geldanamycin	BRD-K11528507	24.4	10um	FDR	NEU.KCL	sirolimus	BRD-K84937637	24	10um	FDR	A549	2.21287e-05	0.728724
camptothecin	BRD-K37890730	6	1.1111um	FDR	A549	sirolimus	BRD-K84937637	6	0.1235um	FDR	A549	2.29173e-05	1.77346
emetine	BRD-K03067624	6	10um	FDR	A549	sirolimus	BRD-A23770159	6	11.1um	FDR	A549	2.3064e-05	2.00298
gossypol	BRD-K19295594	6	11.1um	FDR	A549	sirolimus	BRD-A23770159	6	11.1um	FDR	A549	2.34987e-05	2.16037
brefeldin-a	BRD-A84228258	6	10um	FDR	NPC	sirolimus	BRD-A79768653	6	10um	FDR	HEPG2	2.36341e-05	2.11926
thapsigargin	BRD-A62809825	24	10um	FDR	A549	sirolimus	BRD-A79768653	6	10um	FDR	A549	2.37661e-05	1.31281
camptothecin	BRD-K37890730	6	1.1111um	FDR	A549	sirolimus	BRD-K84937637	6	0.0015um	FDR	A549	2.50498e-05	2.55558
camptothecin	BRD-K37890730	6	3.3333um	FDR	A549	sirolimus	BRD-A79768653	6	10um	FDR	A549	2.5276e-05	1.4207
bufalin	BRD-K63606607	24	10um	FDR	NPC	sirolimus	BRD-A79768653	24	10um	FDR	A549	2.56117e-05	2.36881
strophanthidin	BRD-K84595254	6	10um	FDR	HT29	sirolimus	BRD-A79768653	6	10um	FDR	HT29	2.57108e-05	2.27161
gingerol	BRD-K26117720	24.4	10um	FDR	NEU.KCL	sirolimus	BRD-A50287119	6.4	10um	FDR	NEU.KCL	2.58265e-05	0.85368
gossypol	BRD-K19295594	24	11.1um	FDR	A549	sirolimus	BRD-A23770159	24	11.1um	FDR	A549	2.59393e-05	0.659413
hinokitiol	BRD-K37691127	24	10um	FDR	A549	sirolimus	BRD-K84937637	6	0.0412um	FDR	A549	2.62509e-05	3.06169
cyclosporin-a	BRD-A64290322	6	10um	FDR	A549	sirolimus	BRD-A79768653	6	10um	FDR	A549	2.66805e-05	2.20968
cymarin	BRD-A71459254	24	10um	FDR	NPC	sirolimus	BRD-K84937637	24	10um	FDR	NPC	2.81233e-05	1.53487
latrunculin-b	BRD-A19248578	24	10um	FDR	A549	sirolimus	BRD-K84937637	6	0.3704um	FDR	A549	2.81411e-05	2.88887
cycloheximide	BRD-A62184259	24	10um	FDR	NPC	sirolimus	BRD-K99369265	24	10um	FDR	NPC	2.86986e-05	2.53661
geldanamycin	BRD-A19500257	6	10um	FDR	NPC	sirolimus	BRD-A79768653	6	10um	FDR	HT29	2.88075e-05	1.97925
thiostrepton	BRD-A20697603	24	10um	FDR	A549	sirolimus	BRD-K84937637	24	10um	FDR	A549	2.92771e-05	0.895613
pterostilbene	BRD-K92870997	24	10um	FDR	NPC	sirolimus	BRD-A79768653	6	10um	FDR	HT29	2.93233e-05	2.65972
camptothecin	BRD-K37890730	6	10um	FDR	A549	sirolimus	BRD-K84937637	6	10um	FDR	A549	2.94502e-05	1.30658
emetine	BRD-K03067624	6	10um	FDR	A549	sirolimus	BRD-K84937637	24	10um	FDR	A549	2.9516e-05	0.727933
tamoxifen	BRD-K93754473	6	28.39um	FDR	A549	sirolimus	BRD-A79768653	6	10um	FDR	HEPG2	2.9546e-05	3.02597
mitomycin-c	BRD-A48237631	24	10um	FDR	NPC	sirolimus	BRD-K84937637	24	10um	FDR	NPC	3.06662e-05	1.50673
daunorubicin	BRD-K43389675	6	10um	FDR	HEPG2	sirolimus	BRD-A50287119	24.4	10um	FDR	NEU.KCL	3.07332e-05	1.0888
cerulenin	BRD-K52075040	6	44.4um	FDR	A549	sirolimus	BRD-A23770159	6	11.1um	FDR	A549	3.07346e-05	3.61673
reserpine	BRD-K95921201	24	10um	FDR	A549	sirolimus	BRD-A79768653	6	10um	FDR	HT29	3.07346e-05	3.61673
epoxycholesterol	BRD-K61480498	6	10um	FDR	A549	sirolimus	BRD-A79768653	6	10um	FDR	HT29	3.07893e-05	2.41111
cycloheximide	BRD-K36055864	6	10um	FDR	HEPG2	sirolimus	BRD-A79768653	6	10um	FDR	A549	3.09594e-05	1.40233
geldanamycin	BRD-A19500257	6	10um	FDR	A549	sirolimus	BRD-A79768653	6	10um	FDR	HT29	3.09684e-05	1.97014
latrunculin-b	BRD-A19248578	6	10um	FDR	HT29	sirolimus	BRD-K89626439	6	10um	FDR	HT29	3.09695e-05	3.97835
brefeldin-a	BRD-A17065207	6	10um	FDR	HT29	sirolimus	BRD-A79768653	6	10um	FDR	HT29	3.11638e-05	1.92887
BRD-A14178283	BRD-A14178283	6	10um	FDR	HEPG2	sirolimus	BRD-K84937637	24	10um	FDR	A549	3.12849e-05	0.884237
rottlerin	BRD-K03816923	24	10um	FDR	NPC	sirolimus	BRD-A79768653	24	10um	FDR	A549	3.15569e-05	2.21311
hinokitiol	BRD-K37691127	24	10um	FDR	A549	sirolimus	BRD-K84937637	6	0.0046um	FDR	A549	3.16664e-05	3.56168
bufalin	BRD-K63606607	6	10um	FDR	HT29	sirolimus	BRD-A79768653	6	10um	FDR	A549	3.20721e-05	1.62416
camptothecin	BRD-K37890730	6	10um	FDR	A549	sirolimus	BRD-A79768653	24	10um	FDR	A549	3.23334e-05	2.24218
rottlerin	BRD-K03816923	6	10um	FDR	NPC	sirolimus	BRD-A79768653	6	10um	FDR	HT29	3.23998e-05	2.2349
nelfinavir	BRD-K60460488	6	10um	FDR	A549	sirolimus	BRD-K99369265	6	10um	FDR	A549	3.24204e-05	1.76379
epigallocatechin	BRD-K55591206	24.4	10um	FDR	NEU.KCL	sirolimus	BRD-A50287119	24.4	10um	FDR	NEU.KCL	3.25081e-05	2.93961
mitomycin-c	BRD-A48237631	6	10um	FDR	A549	sirolimus	BRD-A50287119	24.4	10um	FDR	NEU.KCL	3.25862e-05	1.43194
caffeic-acid-phenethyl-ester	BRD-K96188950	6	17.5867um	FDR	HEPG2	sirolimus	BRD-K84937637	6	10um	FDR	HT29	3.34653e-05	3.95237
chaetocin	BRD-A85860691	24	0.08um	FDR	HT29	sirolimus	BRD-K84937637	24	10um	FDR	A549	3.3886e-05	0.750483
desoxycortone	BRD-K98521173	6	10um	FDR	A549	sirolimus	BRD-A79768653	6	10um	FDR	HT29	3.39611e-05	5.0689
hydroxycholesterol	BRD-K35307346	24.4	10um	FDR	NEU.KCL	sirolimus	BRD-A79768653	6	10um	FDR	HT29	3.39611e-05	5.0689
penitrem-a	BRD-K03842655	6	10um	FDR	HEPG2	sirolimus	BRD-A79768653	6	10um	FDR	HT29	3.39611e-05	5.0689
toremifene	BRD-K51350053	6	10um	FDR	HEPG2	sirolimus	BRD-A79768653	6	10um	FDR	HT29	3.39611e-05	5.0689
cyclosporin-a	BRD-A64290322	6	10um	FDR	HT29	sirolimus	BRD-K89626439	6	10um	FDR	A549	3.39611e-05	5.0689
piceatannol	BRD-K91509126	6	10um	FDR	NPC	sirolimus	BRD-K84937637	6	0.1235um	FDR	A549	3.41811e-05	1.95516
BRD-A14178283	BRD-A14178283	6	10um	FDR	HEPG2	sirolimus	BRD-A79768653	6	10um	FDR	A549	3.42122e-05	1.39325
trichostatin-a	BRD-K68202742	6	10um	FDR	A549	sirolimus	BRD-A79768653	6	10um	FDR	A549	3.43259e-05	1.87495
bufalin	BRD-K63606607	24	10um	FDR	NPC	sirolimus	BRD-K84937637	24	10um	FDR	A549	3.47447e-05	0.726755
disulfiram	BRD-K32744045	6	10um	FDR	HT29	sirolimus	BRD-K84937637	6	10um	FDR	A549	3.55104e-05	1.55586
verrucarin-a	BRD-A26002865	24	10um	FDR	NPC	sirolimus	BRD-K99369265	24	10um	FDR	NPC	3.58175e-05	2.4544
rottlerin	BRD-K03816923	24	9.68um	FDR	HT29	sirolimus	BRD-K84937637	24	10um	FDR	NPC	3.62022e-05	1.56906
epirubicin	BRD-A56518012	6.4	10um	FDR	NEU.KCL	sirolimus	BRD-A50287119	24.4	10um	FDR	NEU.KCL	3.65055e-05	1.33197
fluorouracil	BRD-K24844714	6	0.0046um	FDR	A549	sirolimus	BRD-K84937637	6	0.0412um	FDR	A549	3.65479e-05	2.97361
trichostatin-a	BRD-K68202742	24	10um	FDR	A549	sirolimus	BRD-A79768653	24	10um	FDR	A549	3.6602e-05	2.18782
cyclosporin-a	BRD-A69815203	6	10um	FDR	HEPG2	sirolimus	BRD-K89626439	6	10um	FDR	A549	3.77792e-05	6.87833
withaferin-a	BRD-A52193669	6	10um	FDR	HT29	sirolimus	BRD-A79768653	6	10um	FDR	A549	3.8042e-05	1.49541
podophyllotoxin	BRD-K47869605	24	10um	FDR	NPC	sirolimus	BRD-K84937637	24	10um	FDR	NPC	3.81697e-05	1.47285
genistein	BRD-K43797669	6	10um	FDR	HT29	sirolimus	BRD-A79768653	6	10um	FDR	HEPG2	3.87551e-05	2.34919
thiostrepton	BRD-A20697603	24	10um	FDR	A549	sirolimus	BRD-A50287119	24.4	10um	FDR	NEU.KCL	3.87847e-05	1.13815
cyclosporin-a	BRD-A69815203	6	10um	FDR	HT29	sirolimus	BRD-K84937637	6	10um	FDR	A549	3.88451e-05	2.65107
cerulenin	BRD-K52075040	6	44.4um	FDR	A549	sirolimus	BRD-A79768653	6	10um	FDR	A549	3.95359e-05	3.11622
paroxetine	BRD-K37991163	6	10um	FDR	HT29	sirolimus	BRD-A79768653	6	10um	FDR	A549	3.95359e-05	3.11622
geldanamycin	BRD-K11528507	6	10um	FDR	NPC	sirolimus	BRD-A50287119	24.4	10um	FDR	NEU.KCL	3.96297e-05	1.1042
homoharringtonine	BRD-K76674262	6	10um	FDR	HT29	sirolimus	BRD-K84937637	24	10um	FDR	A549	4.0064e-05	0.776262
cycloheximide	BRD-K36055864	24	10um	FDR	A549	sirolimus	BRD-K84937637	24	10um	FDR	A549	4.04346e-05	0.869436
cycloheximide	BRD-A62184259	24	10um	FDR	NPC	sirolimus	BRD-K84937637	24	10um	FDR	A549	4.0711e-05	0.785697
pidorubicine	BRD-K04548931	24	10um	FDR	A549	sirolimus	BRD-K84937637	6	10um	FDR	A549	4.15068e-05	1.28627
rottlerin	BRD-K03816923	24	9.68um	FDR	HT29	sirolimus	BRD-A79768653	6	10um	FDR	A549	4.16558e-05	1.37524
thapsigargin	BRD-A62809825	6	10um	FDR	HT29	sirolimus	BRD-A79768653	6	10um	FDR	HEPG2	4.18573e-05	1.86825
cyclosporin-a	BRD-A38030642	24	10um	FDR	A549	sirolimus	BRD-K84937637	6	10um	FDR	A549	4.22516e-05	1.6637
testosterone	BRD-A55393291	24	10um	FDR	NPC	sirolimus	BRD-A79768653	6	10um	FDR	HT29	4.23549e-05	2.58346
geldanamycin	BRD-A19500257	24	10um	FDR	NPC	metformin	BRD-K79602928	6	10um	FDR	HT29	4.28484e-05	0.688339
tamoxifen	BRD-K93754473	6	28.39um	FDR	A549	sirolimus	BRD-K84937637	6	10um	FDR	HEPG2	4.30747e-05	4.63021
staurosporine	BRD-K17953061	24	10um	FDR	A549	sirolimus	BRD-K84937637	6	0.0412um	FDR	A549	4.32211e-05	2.83184
tamoxifen	BRD-K93754473	6	28.39um	FDR	A549	sirolimus	BRD-A79768653	24	10um	FDR	HT29	4.42623e-05	2.60949
C2-dihydroceramide	BRD-K62910157	6	10um	FDR	NPC	sirolimus	BRD-A50287119	6	10um	FDR	NPC	4.45815e-05	1.24197
oligomycin-c	BRD-K05350981	6	10um	FDR	A549	sirolimus	BRD-K89626439	6	10um	FDR	A549	4.51512e-05	4.96145
BRD-K59460069	BRD-K59460069	6	10um	FDR	HEPG2	sirolimus	BRD-A79768653	6	10um	FDR	HT29	4.51571e-05	2.18194
tamoxifen	BRD-K93754473	24	28.39um	FDR	HT29	sirolimus	BRD-A79768653	6	10um	FDR	HEPG2	4.53786e-05	1.85801
paroxetine	BRD-K37991163	6	10um	FDR	A549	sirolimus	BRD-A79768653	6	10um	FDR	HT29	4.53995e-05	2.90908
progesterone	BRD-K64994968	24	10um	FDR	NPC	sirolimus	BRD-A50287119	6	10um	FDR	NPC	4.57593e-05	1.91577
cyclosporin-a	BRD-A69815203	6	10um	FDR	A549	sirolimus	BRD-K84937637	6	10um	FDR	HT29	4.5938e-05	4.468
cyclosporin-a	BRD-A69815203	6	10um	FDR	A549	sirolimus	BRD-K89626439	6	10um	FDR	HT29	4.5938e-05	4.468
homoveratrylamine	BRD-K59570838	6	10um	FDR	HEPG2	metformin	BRD-K79602928	6	10um	FDR	HT29	4.60107e-05	1.53745
arcyriaflavin-a	BRD-K72726508	6	10um	FDR	HEPG2	sirolimus	BRD-A79768653	24	10um	FDR	HT29	4.61526e-05	3.86584
chaetocin	BRD-A85860691	6	0.08um	FDR	A549	sirolimus	BRD-A79768653	6	10um	FDR	A549	4.64295e-05	1.65065
ouabain	BRD-A68930007	24	10um	FDR	NPC	sirolimus	BRD-A79768653	24	10um	FDR	A549	4.71209e-05	2.29387
oligomycin-a	BRD-K74133369	24	10um	FDR	A549	sirolimus	BRD-A79768653	6	10um	FDR	HT29	4.74491e-05	1.97474
simvastatin	BRD-A81772229	24	10um	FDR	HT29	sirolimus	BRD-A79768653	6	10um	FDR	HT29	4.76204e-05	3.46153
digoxin	BRD-K23478508	24	10um	FDR	A549	sirolimus	BRD-A79768653	6	10um	FDR	HT29	4.76806e-05	1.85876
thapsigargin	BRD-A62809825	24	10um	FDR	A549	sirolimus	BRD-K84937637	6	10um	FDR	A549	4.79728e-05	1.26945
GR-235	BRD-K26674531	6	10um	FDR	A549	metformin	BRD-K79602928	6	10um	FDR	HT29	4.86503e-05	0.84452
gossypol	BRD-K19295594	6	11.1um	FDR	A549	sirolimus	BRD-K84937637	6	10um	FDR	A549	4.89247e-05	1.57832
ochratoxin-a	BRD-K39944607	24	10um	FDR	A549	sirolimus	BRD-K84937637	6	10um	FDR	A549	4.91374e-05	1.82489
BRD-K85853281	BRD-K85853281	6	10um	FDR	HEPG2	sirolimus	BRD-A79768653	6	10um	FDR	HT29	5.00848e-05	1.91981
anisomycin	BRD-K91370081	6	10um	FDR	HEPG2	sirolimus	BRD-A79768653	6	10um	FDR	A549	5.02333e-05	1.82141
chaetocin	BRD-A85860691	6	0.08um	FDR	A549	sirolimus	BRD-A79768653	6	10um	FDR	HT29	5.02538e-05	2.16482
tamoxifen	BRD-K93754473	6	28.39um	FDR	A549	sirolimus	BRD-K89626439	24	10um	FDR	A549	5.074e-05	2.58174
westcort	BRD-A23290232	6	10um	FDR	HT29	sirolimus	BRD-K84937637	6	0.0137um	FDR	A549	5.0743e-05	1.64338
parthenolide	BRD-K28120222	6	10um	FDR	A549	metformin	BRD-K79602928	6	10um	FDR	HT29	5.11505e-05	1.04646
latrunculin-b	BRD-A19248578	24	10um	FDR	A549	sirolimus	BRD-A23770159	6	11.1um	FDR	A549	5.12525e-05	1.96426
parthenolide	BRD-K28120222	24	10um	FDR	NPC	sirolimus	BRD-A50287119	24.4	10um	FDR	NEU.KCL	5.12735e-05	1.30015
GR-235	BRD-K26674531	6	10um	FDR	HEPG2	sirolimus	BRD-A79768653	6	10um	FDR	HEPG2	5.15609e-05	4.9116
penitrem-a	BRD-K03842655	6	10um	FDR	HEPG2	sirolimus	BRD-A79768653	6	10um	FDR	HEPG2	5.15609e-05	4.9116
sappanone-a	BRD-K03557653	6	10um	FDR	HEPG2	sirolimus	BRD-A79768653	6	10um	FDR	HEPG2	5.15609e-05	4.9116
puromycin	BRD-K36007650	6	10um	FDR	A549	sirolimus	BRD-K84937637	6	10um	FDR	A549	5.17695e-05	1.71963
idarubicin	BRD-K69650333	6	10um	FDR	A549	sirolimus	BRD-A50287119	24.4	10um	FDR	NEU.KCL	5.23362e-05	0.989743
ginsenoside	BRD-A65550283	6	10um	FDR	A549	metformin	BRD-K79602928	6	10um	FDR	HT29	5.33697e-05	0.856072
dehydroisoandosterone	BRD-K96527333	6	10um	FDR	HT29	metformin	BRD-K79602928	6	10um	FDR	HT29	5.35837e-05	0.899664
amoxicillin	BRD-K55044200	6	10um	FDR	A549	sirolimus	BRD-A79768653	6	10um	FDR	HEPG2	5.37536e-05	3.45105
verrucarin-a	BRD-A26002865	6	10um	FDR	HEPG2	sirolimus	BRD-A79768653	6	10um	FDR	A549	5.39232e-05	1.4594
mycophenolic-acid	BRD-K63750851	24	10um	FDR	HEPG2	metformin	BRD-K79602928	6	10um	FDR	HT29	5.42426e-05	0.682767
homoharringtonine	BRD-K76674262	24	10um	FDR	HEPG2	sirolimus	BRD-K84937637	24	10um	FDR	A549	5.46703e-05	0.688475
rosiglitazone	BRD-A97437073	24	80um	FDR	A549	sirolimus	BRD-A50287119	24.4	10um	FDR	NEU.KCL	5.53201e-05	1.11285
phenethyl-isothiocyanate	BRD-K56700933	6	10um	FDR	HEPG2	sirolimus	BRD-A79768653	6	10um	FDR	HEPG2	5.69261e-05	1.89867
digoxin	BRD-K23478508	6	10um	FDR	HEPG2	sirolimus	BRD-A79768653	6	10um	FDR	A549	5.83546e-05	1.92074
quinidine	BRD-K70799801	6	10um	FDR	HT29	metformin	BRD-K79602928	6	10um	FDR	HT29	5.9299e-05	1.19713
geldanamycin	BRD-A19500257	24	10um	FDR	A549	sirolimus	BRD-K89626439	24	10um	FDR	NPC	5.96608e-05	Inf
piperlongumine	BRD-K24132293	24	10um	FDR	A549	sirolimus	BRD-A79768653	24	10um	FDR	A549	5.97026e-05	2.37112
butein	BRD-K17497770	24	10um	FDR	NPC	sirolimus	BRD-K84937637	24	10um	FDR	NPC	6.0492e-05	1.92502
estradiol-valerate	BRD-A39747742	6	10um	FDR	A549	sirolimus	BRD-A79768653	6	10um	FDR	A549	6.0717e-05	3.78851
lithocholic-acid	BRD-K20986251	6.4	10um	FDR	NEU.KCL	sirolimus	BRD-A50287119	6.4	10um	FDR	NEU.KCL	6.16784e-05	2.39122
cymarin	BRD-A71459254	6	10um	FDR	HT29	sirolimus	BRD-A79768653	6	10um	FDR	A549	6.22177e-05	1.61502
cyclosporin-a	BRD-A69815203	24	10um	FDR	A549	sirolimus	BRD-K84937637	6	10um	FDR	A549	6.26653e-05	2.95859
cyclosporin-a	BRD-A69815203	6	10um	FDR	HEPG2	sirolimus	BRD-K84937637	6	10um	FDR	HEPG2	6.29222e-05	6.47183
A-23187	BRD-K41431477	6	2.5um	FDR	HEPG2	sirolimus	BRD-A79768653	6	10um	FDR	HT29	6.37132e-05	1.84729
ursolic-acid	BRD-K68185022	24	70.07um	FDR	HT29	sirolimus	BRD-A79768653	6	10um	FDR	A549	6.38317e-05	1.401
cycloheximide	BRD-A62184259	6	10um	FDR	A549	sirolimus	BRD-K99369265	6	10um	FDR	A549	6.39208e-05	1.62846
brefeldin-a	BRD-A17065207	24	10um	FDR	NPC	sirolimus	BRD-A79768653	24	10um	FDR	A549	6.43146e-05	2.25479
tamoxifen	BRD-K93754473	6	10um	FDR	NPC	sirolimus	BRD-A50287119	24.4	10um	FDR	NEU.KCL	6.5631e-05	1.0415
ingenol	BRD-A52650764	6	10um	FDR	A549	sirolimus	BRD-A23770159	6	11.1um	FDR	A549	6.5942e-05	1.8737
tamoxifen	BRD-K93754473	6	28.39um	FDR	A549	sirolimus	BRD-A79768653	6	10um	FDR	A549	6.59906e-05	2.52827
emetine	BRD-A25687296	6	10um	FDR	HT29	sirolimus	BRD-K99369265	6	10um	FDR	A549	6.64156e-05	1.68191
trichostatin-a	BRD-A19037878	6	10um	FDR	NPC	sirolimus	BRD-A79768653	6	10um	FDR	HT29	6.6711e-05	1.84213
ouabain	BRD-A46747628	6	10um	FDR	HT29	sirolimus	BRD-A79768653	6	10um	FDR	HT29	6.85437e-05	2.11493
ouabain	BRD-A68930007	6	10um	FDR	HT29	sirolimus	BRD-A79768653	6	10um	FDR	HT29	6.85437e-05	2.11493
piceatannol	BRD-K91509126	6	10um	FDR	NPC	sirolimus	BRD-A79768653	24	10um	FDR	HT29	6.89228e-05	1.54424
cyclosporin-a	BRD-A69815203	24	10um	FDR	A549	sirolimus	BRD-A79768653	6	10um	FDR	A549	6.99345e-05	2.93282
cyclosporin-a	BRD-A69815203	6	10um	FDR	HT29	sirolimus	BRD-K89626439	6	10um	FDR	HT29	7.03449e-05	4.29885
radicicol	BRD-K33551950	6	10um	FDR	HT29	sirolimus	BRD-K84937637	6	10um	FDR	HEPG2	7.06847e-05	4.14259
cephaeline	BRD-K80348542	6	10um	FDR	A549	sirolimus	BRD-K99369265	6	10um	FDR	A549	7.10837e-05	1.62559
oligomycin-a	BRD-K74133369	24	10um	FDR	A549	sirolimus	BRD-A50287119	24	10um	FDR	NPC	7.13202e-05	1.43721
camptothecin	BRD-K37890730	6	0.1235um	FDR	A549	sirolimus	BRD-K84937637	6	10um	FDR	A549	7.1966e-05	1.534
ouabain	BRD-A46747628	24	10um	FDR	A549	sirolimus	BRD-K84937637	24	10um	FDR	NPC	7.27e-05	1.41227
trichostatin-a	BRD-K68202742	24	10um	FDR	A549	sirolimus	BRD-K84937637	24	10um	FDR	A549	7.32736e-05	0.765617
camptothecin	BRD-K37890730	6	0.0046um	FDR	A549	sirolimus	BRD-K84937637	6	0.0137um	FDR	A549	7.35504e-05	2.49364
camptothecin	BRD-K37890730	6	0.0046um	FDR	A549	sirolimus	BRD-K84937637	6	1.1111um	FDR	A549	7.38717e-05	2.79506
trichostatin-a	BRD-A19037878	6	10um	FDR	A549	sirolimus	BRD-A23770159	6	11.1um	FDR	A549	7.41736e-05	2.34141
piceatannol	BRD-K91509126	6	10um	FDR	NPC	sirolimus	BRD-K89626439	6	10um	FDR	A549	7.43593e-05	Inf
brefeldin-a	BRD-A84228258	24	10um	FDR	NPC	sirolimus	BRD-A50287119	24	10um	FDR	NPC	7.44041e-05	1.32707
brefeldin-a	BRD-A31107743	6	0.09um	FDR	A549	sirolimus	BRD-A79768653	6	10um	FDR	A549	7.47691e-05	2.03091
xanthohumol	BRD-K77390737	6	10um	FDR	HEPG2	sirolimus	BRD-K89626439	6	10um	FDR	A549	7.5455e-05	6.18415
withaferin-a	BRD-A52193669	6	10um	FDR	HT29	sirolimus	BRD-K84937637	6	10um	FDR	HT29	7.60234e-05	3.76166
hydrocortisone	BRD-A25143711	24	10um	FDR	A549	sirolimus	BRD-A50287119	24	10um	FDR	NPC	7.61765e-05	1.67056
geldanamycin	BRD-K11528507	24	10um	FDR	NPC	sirolimus	BRD-A50287119	24	10um	FDR	NPC	7.64014e-05	1.43108
forskolin	BRD-A70449690	6	10um	FDR	HEPG2	sirolimus	BRD-A23770159	6	11.1um	FDR	HEPG2	7.66451e-05	0.767542
BRD-K85853281	BRD-K85853281	6	10um	FDR	HEPG2	sirolimus	BRD-A79768653	6	10um	FDR	A549	7.71224e-05	1.21843
epigallocatechin	BRD-K55591206	6	10um	FDR	NPC	sirolimus	BRD-K84937637	24	10um	FDR	NPC	7.81733e-05	3.44255
radicicol	BRD-K33551950	6	10um	FDR	A549	sirolimus	BRD-A50287119	6	10um	FDR	NPC	7.85295e-05	0.87703
C2-dihydroceramide	BRD-K62910157	24.4	10um	FDR	NEU.KCL	metformin	BRD-K79602928	6	10um	FDR	HT29	7.85965e-05	0.756194
lovastatin	BRD-A70155556	24	40um	FDR	A549	sirolimus	BRD-A79768653	24	10um	FDR	A549	7.90809e-05	2.08597
forskolin	BRD-K09602097	24	10um	FDR	A549	metformin	BRD-K79602928	6	10um	FDR	HT29	7.92114e-05	1.05336
thapsigargin	BRD-A62809825	24	10um	FDR	HT29	sirolimus	BRD-K84937637	24	10um	FDR	A549	7.95632e-05	0.667345
tacrolimus	BRD-K44094599	6	10um	FDR	HT29	sirolimus	BRD-A79768653	24	10um	FDR	HT29	7.98892e-05	Inf
cyclosporin-a	BRD-A38030642	24	10um	FDR	A549	sirolimus	BRD-K84937637	24	10um	FDR	NPC	7.99672e-05	1.77732
isoliquiritigenin	BRD-K33583600	6	10um	FDR	HEPG2	sirolimus	BRD-A79768653	6	10um	FDR	HEPG2	8.03741e-05	1.85145
withaferin-a	BRD-A52193669	6	10um	FDR	HT29	sirolimus	BRD-A79768653	6	10um	FDR	HEPG2	8.03741e-05	1.85145
sphingosine	BRD-K62959606	6	10um	FDR	A549	sirolimus	BRD-A23770159	6	11.1um	FDR	HEPG2	8.08208e-05	0.88303
BRD-A59728941	BRD-A59728941	6	10um	FDR	HEPG2	sirolimus	BRD-A79768653	6	10um	FDR	HEPG2	8.11431e-05	1.67205
trichostatin-a	BRD-A19037878	6	10um	FDR	HEPG2	sirolimus	BRD-K84937637	6	10um	FDR	A549	8.16237e-05	1.29928
cephaeline	BRD-K80348542	6	10um	FDR	A549	sirolimus	BRD-A79768653	6	10um	FDR	HT29	8.18079e-05	1.79504
rotenone	BRD-K08316444	24	10um	FDR	NPC	sirolimus	BRD-A79768653	6	10um	FDR	A549	8.24855e-05	1.58045
epirubicin	BRD-A56518012	6	10um	FDR	NPC	sirolimus	BRD-A50287119	6	10um	FDR	NPC	8.29504e-05	0.879482
heliomycin	BRD-K64517075	6	10um	FDR	HT29	sirolimus	BRD-A50287119	6	10um	FDR	NPC	8.34955e-05	0.89199
pidorubicine	BRD-K04548931	24	10um	FDR	A549	sirolimus	BRD-A50287119	24	10um	FDR	NPC	8.36754e-05	1.24127
arctigenin	BRD-K53523901	6	10um	FDR	A549	sirolimus	BRD-A79768653	6	10um	FDR	HT29	8.37249e-05	4.37471
licochalcone-a	BRD-K99667445	24.4	10um	FDR	NEU.KCL	sirolimus	BRD-A79768653	6	10um	FDR	HT29	8.37249e-05	4.37471
pterostilbene	BRD-K92870997	6	10um	FDR	NPC	sirolimus	BRD-A79768653	6	10um	FDR	HT29	8.37249e-05	4.37471
rottlerin	BRD-K03816923	6	9.68um	FDR	HT29	sirolimus	BRD-A79768653	6	10um	FDR	HT29	8.37249e-05	4.37471
retinol	BRD-K13927029	6	10um	FDR	A549	metformin	BRD-K79602928	6	10um	FDR	HT29	8.39119e-05	0.821827
forskolin	BRD-A70449690	6	10um	FDR	HEPG2	metformin	BRD-K79602928	6	10um	FDR	HT29	8.47853e-05	0.696879
retinol	BRD-K13927029	6	10um	FDR	A549	sirolimus	BRD-K84937637	6	0.0412um	FDR	A549	8.48641e-05	1.71049
radicicol	BRD-K33551950	6	10um	FDR	A549	sirolimus	BRD-A79768653	6	10um	FDR	A549	8.48798e-05	1.21431
cyclosporin-a	BRD-A38030642	24	10um	FDR	NPC	sirolimus	BRD-A79768653	6	10um	FDR	HEPG2	8.55189e-05	1.66627
progesterone	BRD-K64994968	6	10um	FDR	NPC	sirolimus	BRD-K89626439	24	10um	FDR	A549	8.57348e-05	Inf
coumestrol	BRD-K97509413	6	10um	FDR	HT29	metformin	BRD-K79602928	6	10um	FDR	HT29	8.66391e-05	0.755403
thapsigargin	BRD-A62809825	24	10um	FDR	A549	sirolimus	BRD-A79768653	24	10um	FDR	A549	8.70815e-05	2.11555
lasalocid	BRD-A72711497	24	10um	FDR	HT29	sirolimus	BRD-K89626439	24	10um	FDR	A549	8.81712e-05	1.6514
ursolic-acid	BRD-K68185022	6	70.07um	FDR	A549	sirolimus	BRD-A79768653	6	10um	FDR	HT29	9.06224e-05	1.96303
ursolic-acid	BRD-K68185022	6	70.07um	FDR	A549	sirolimus	BRD-A23770159	6	11.1um	FDR	A549	9.06224e-05	1.96303
narciclasine	BRD-K06792661	6	10um	FDR	A549	sirolimus	BRD-A23770159	6	11.1um	FDR	A549	9.15253e-05	1.80634
HO-013	BRD-K86465814	6	10um	FDR	NPC	sirolimus	BRD-A50287119	6	10um	FDR	NPC	9.16076e-05	1.28711
radicicol	BRD-K33551950	6	10um	FDR	HEPG2	sirolimus	BRD-K99369265	6	10um	FDR	HEPG2	9.18587e-05	Inf
cyclosporin-a	BRD-A64290322	6	10um	FDR	A549	sirolimus	BRD-K89626439	6	10um	FDR	A549	9.27202e-05	4.69276
lovastatin	BRD-A70155556	6	40um	FDR	HEPG2	metformin	BRD-K79602928	6	10um	FDR	HT29	9.29228e-05	0.773277
anisomycin	BRD-K82261406	6	10um	FDR	NPC	sirolimus	BRD-K84937637	24	10um	FDR	A549	9.34196e-05	0.690315
cyclosporin-a	BRD-K13533483	6	10um	FDR	A549	sirolimus	BRD-K84937637	6	10um	FDR	A549	9.36778e-05	2.17953
brefeldin-a	BRD-A31107743	24	0.09um	FDR	HT29	sirolimus	BRD-K84937637	6	10um	FDR	HT29	9.37581e-05	Inf
cyclosporin-a	BRD-A69815203	6	10um	FDR	HEPG2	sirolimus	BRD-K84937637	6	10um	FDR	HT29	9.43186e-05	6.18312
cyclosporin-a	BRD-K13533483	6	10um	FDR	HEPG2	sirolimus	BRD-K84937637	6	10um	FDR	HT29	9.43186e-05	6.18312
retinol	BRD-K13927029	6	10um	FDR	HEPG2	sirolimus	BRD-K99369265	6	10um	FDR	HEPG2	9.43186e-05	6.18312
tacrolimus	BRD-K69608737	6	10um	FDR	HT29	sirolimus	BRD-K89626439	6	10um	FDR	HT29	9.43186e-05	6.18312
cytochalasin-b	BRD-K26664453	6	10um	FDR	A549	sirolimus	BRD-A79768653	6	10um	FDR	A549	9.43264e-05	1.99059
cycloserine	BRD-K87226815	6	10um	FDR	HT29	sirolimus	BRD-K84937637	6	0.3704um	FDR	A549	9.45776e-05	Inf
rotenone	BRD-K08316444	6	0.63um	FDR	A549	sirolimus	BRD-A79768653	6	10um	FDR	A549	9.54834e-05	2.44017
parthenolide	BRD-K98548675	6	10um	FDR	HEPG2	sirolimus	BRD-A79768653	6	10um	FDR	HEPG2	9.74094e-05	2.3979
BRD-A59728941	BRD-A59728941	6	10um	FDR	HEPG2	sirolimus	BRD-K84937637	24	10um	FDR	A549	9.79219e-05	0.71277
cyclosporin-a	BRD-A69815203	6	10um	FDR	HEPG2	sirolimus	BRD-A79768653	6	10um	FDR	A549	9.82674e-05	Inf
tacrolimus	BRD-K69608737	6	10um	FDR	HT29	sirolimus	BRD-A79768653	6	10um	FDR	A549	9.82674e-05	Inf
hydroxycholesterol	BRD-K35307346	6	10um	FDR	NPC	sirolimus	BRD-K84937637	6	0.0046um	FDR	A549	9.83256e-05	2.53959
capsaicin	BRD-K50590187	6	160um	FDR	A549	sirolimus	BRD-A79768653	6	10um	FDR	HT29	0.000100305	3.2081
gingerol	BRD-K26117720	6	10um	FDR	A549	sirolimus	BRD-A23770159	6	11.1um	FDR	A549	0.000100305	3.2081
scopolamine	BRD-K89923877	6	10um	FDR	A549	sirolimus	BRD-A79768653	6	10um	FDR	HT29	0.000100305	3.2081
westcort	BRD-A23290232	6	10um	FDR	A549	sirolimus	BRD-A79768653	6	10um	FDR	HT29	0.000100305	3.2081
hinokitiol	BRD-K37691127	6	10um	FDR	HT29	metformin	BRD-K79602928	6	10um	FDR	HT29	0.000100745	0.872459
thapsigargin	BRD-A62809825	24	10um	FDR	A549	sirolimus	BRD-K84937637	24	10um	FDR	NPC	0.00010118	1.3912
oligomycin-c	BRD-K05350981	6	10um	FDR	HT29	sirolimus	BRD-A79768653	24	10um	FDR	HT29	0.000104236	3.45931
ursolic-acid	BRD-K68185022	6	70.07um	FDR	A549	sirolimus	BRD-K89626439	6	10um	FDR	A549	0.000104353	Inf
emodic-acid	BRD-K94841585	24	10um	FDR	NPC	sirolimus	BRD-A50287119	24	10um	FDR	NPC	0.000104807	1.97055
anacardic-acid	BRD-K66989831	6	10um	FDR	NPC	metformin	BRD-K79602928	6	10um	FDR	HT29	0.000107316	0.912432
erbstatin-analog	BRD-K35573744	6	10um	FDR	HT29	sirolimus	BRD-K84937637	6	0.0137um	FDR	A549	0.000108038	1.43747
cyclosporin-a	BRD-A38030642	6	10um	FDR	A549	sirolimus	BRD-K99369265	6	10um	FDR	A549	0.000108551	2.15245
ouabain	BRD-A68930007	6	10um	FDR	HEPG2	sirolimus	BRD-A79768653	6	10um	FDR	A549	0.000108551	2.15245
oligomycin-c	BRD-K05350981	6	10um	FDR	A549	sirolimus	BRD-K84937637	6	10um	FDR	HEPG2	0.000111138	4.26725
rottlerin	BRD-K03816923	24.4	10um	FDR	NEU.KCL	sirolimus	BRD-A79768653	6	10um	FDR	HEPG2	0.000111262	1.89166
daunorubicin	BRD-A68009927	6	10um	FDR	HT29	sirolimus	BRD-A79768653	6	10um	FDR	HT29	0.000111413	2.38281
tamoxifen	BRD-K93754473	24	28.39um	FDR	HT29	sirolimus	BRD-K99369265	6	10um	FDR	A549	0.000112393	1.71253
gossypol	BRD-K19295594	6	11.1um	FDR	HEPG2	sirolimus	BRD-K84937637	24	10um	FDR	A549	0.000112914	0.80948
emetine	BRD-A25687296	6	10um	FDR	HT29	sirolimus	BRD-K84937637	24	10um	FDR	A549	0.000113836	0.793363
thapsigargin	BRD-K69023402	24.4	10um	FDR	NEU.KCL	sirolimus	BRD-A79768653	6	10um	FDR	HT29	0.000113948	1.85419
doxorubicin	BRD-A76941896	6	10um	FDR	A549	sirolimus	BRD-K84937637	6	0.1235um	FDR	A549	0.0001141	1.66614
thapsigargin	BRD-K69023402	24	10um	FDR	HT29	sirolimus	BRD-A50287119	24	10um	FDR	NPC	0.000114238	1.2359
doxorubicin	BRD-K92093830	24	10um	FDR	A549	sirolimus	BRD-A79768653	6	10um	FDR	HT29	0.000115125	1.75715
reserpine	BRD-K95921201	6	10um	FDR	HT29	sirolimus	BRD-A23770159	6	11.1um	FDR	A549	0.000115288	1.92712
bufalin	BRD-K63606607	6	10um	FDR	HEPG2	sirolimus	BRD-A79768653	6	10um	FDR	A549	0.000115674	2.77758
trichostatin-a	BRD-A19037878	6	10um	FDR	NPC	sirolimus	BRD-A50287119	6.4	10um	FDR	NEU.KCL	0.000117602	0.765507
rottlerin	BRD-K03816923	24	9.68um	FDR	HT29	sirolimus	BRD-K84937637	6	10um	FDR	A549	0.000118019	1.31042
rottlerin	BRD-K03816923	24	10um	FDR	A549	sirolimus	BRD-K84937637	24	10um	FDR	NPC	0.000120516	1.63963
BRD-A62200266	BRD-A62200266	24	10um	FDR	A549	sirolimus	BRD-K84937637	24	10um	FDR	A549	0.000121665	0.67182
bufalin	BRD-K63606607	6	10um	FDR	HT29	sirolimus	BRD-A79768653	6	10um	FDR	HT29	0.000122182	2.02115
cytochalasin-b	BRD-K26664453	6	10um	FDR	HEPG2	sirolimus	BRD-A23770159	6	11.1um	FDR	HEPG2	0.00012336	1.17039
graveoline	BRD-K92683369	6	10um	FDR	HT29	sirolimus	BRD-A50287119	6.4	10um	FDR	NEU.KCL	0.00012468	0.983253
brefeldin-a	BRD-A17065207	6	10um	FDR	HEPG2	sirolimus	BRD-K84937637	6	10um	FDR	A549	0.000125207	3.40714
salsolinol	BRD-A26112980	6.4	10um	FDR	NEU.KCL	sirolimus	BRD-K84937637	6	10um	FDR	HEPG2	0.000125586	5.77765
xanthohumol	BRD-K77390737	6	10um	FDR	HEPG2	sirolimus	BRD-K84937637	6	10um	FDR	HEPG2	0.000125586	5.77765
rottlerin	BRD-K03816923	24	9.68um	FDR	A549	sirolimus	BRD-A79768653	6	10um	FDR	HT29	0.000126319	1.7462
endecaphyllin-x	BRD-K54728231	6	10um	FDR	HEPG2	sirolimus	BRD-A79768653	6	10um	FDR	HEPG2	0.000126816	4.2174
flavokavain-b	BRD-K30296925	6	10um	FDR	HEPG2	sirolimus	BRD-A79768653	6	10um	FDR	HEPG2	0.000126816	4.2174
pterostilbene	BRD-K92870997	6	10um	FDR	NPC	sirolimus	BRD-A79768653	6	10um	FDR	HEPG2	0.000126816	4.2174
resveratrol	BRD-K25591257	6	10um	FDR	A549	sirolimus	BRD-K84937637	6	10um	FDR	HEPG2	0.000126816	4.2174
rottlerin	BRD-K03816923	6	9.68um	FDR	A549	sirolimus	BRD-K84937637	6	10um	FDR	A549	0.000127271	1.60156
geldanamycin	BRD-K11528507	6.4	10um	FDR	NEU.KCL	sirolimus	BRD-A50287119	6.4	10um	FDR	NEU.KCL	0.000127723	2.20771
digoxin	BRD-K23478508	24	10um	FDR	A549	sirolimus	BRD-A79768653	6	10um	FDR	A549	0.000127852	1.21868
lasalocid	BRD-A72711497	24	10um	FDR	A549	sirolimus	BRD-A79768653	24	10um	FDR	A549	0.000128931	3.11457
piperlongumine	BRD-K24132293	24	10um	FDR	HT29	sirolimus	BRD-K84937637	24	10um	FDR	NPC	0.000129129	1.43549
carnosol	BRD-K67265981	6	10um	FDR	NPC	sirolimus	BRD-A79768653	24	10um	FDR	HT29	0.000130095	2.7222
troglitazone	BRD-A13084692	24	10um	FDR	HT29	sirolimus	BRD-A79768653	24	10um	FDR	HT29	0.000130095	2.7222
piperlongumine	BRD-K24132293	6	10um	FDR	A549	sirolimus	BRD-K84937637	6	10um	FDR	A549	0.000131702	1.4636
spectinomycin	BRD-K11905747	6	10um	FDR	HT29	sirolimus	BRD-K84937637	6	0.0137um	FDR	A549	0.000131734	1.30432
trichostatin-a	BRD-A19037878	24	10um	FDR	A549	sirolimus	BRD-K84937637	6	10um	FDR	A549	0.000131744	1.50024
sphingosine	BRD-K62959606	6	10um	FDR	HEPG2	sirolimus	BRD-K99369265	6	10um	FDR	HEPG2	0.000131955	5.95894
camptothecin	BRD-K37890730	6	0.3704um	FDR	A549	metformin	BRD-K79602928	6	10um	FDR	HT29	0.000133417	0.729798
cycloheximide	BRD-K36055864	6	10um	FDR	HT29	sirolimus	BRD-A79768653	6	10um	FDR	A549	0.0001339	1.45932
aminolevulinic-acid	BRD-K57631554	6	10um	FDR	A549	sirolimus	BRD-A79768653	6	10um	FDR	A549	0.000134615	2.35904
forskolin	BRD-K77830450	6	10um	FDR	NPC	sirolimus	BRD-A79768653	6	10um	FDR	A549	0.000136782	3.38197
oligomycin-c	BRD-K05350981	6	10um	FDR	HT29	sirolimus	BRD-A79768653	6	10um	FDR	A549	0.000136782	3.38197
lasalocid	BRD-A72711497	24	10um	FDR	HT29	sirolimus	BRD-A79768653	6	10um	FDR	A549	0.000137233	1.59028
simvastatin	BRD-K22134346	24	10um	FDR	NPC	sirolimus	BRD-K84937637	24	10um	FDR	NPC	0.000137241	3.21834
cyclosporin-a	BRD-A38030642	6	10um	FDR	HT29	sirolimus	BRD-K89626439	6	10um	FDR	A549	0.00013801	4.54542
BRD-A62200266	BRD-A62200266	24	10um	FDR	A549	sirolimus	BRD-K84937637	24	10um	FDR	NPC	0.000138311	1.36205
ivermectin	BRD-A48570745	6	10um	FDR	HT29	sirolimus	BRD-A79768653	6	10um	FDR	HT29	0.000138458	3.10168
BRD-K59946561	BRD-K59946561	6	10um	FDR	A549	metformin	BRD-K79602928	6	10um	FDR	HT29	0.000138773	1.24733
nornicotine	BRD-A24543851	6	10um	FDR	A549	metformin	BRD-K79602928	6	10um	FDR	HT29	0.000138773	1.24733
butein	BRD-K17497770	24	10um	FDR	NPC	sirolimus	BRD-A79768653	24	10um	FDR	A549	0.000140005	2.3906
AICA-ribonucleotide	BRD-A67373739	6	10um	FDR	HEPG2	sirolimus	BRD-A23770159	6	11.1um	FDR	HEPG2	0.000141071	1.23769
idarubicin	BRD-K69650333	6	10um	FDR	HT29	sirolimus	BRD-K84937637	6	0.3704um	FDR	A549	0.000141328	2.6448
staurosporine	BRD-K17953061	6	10um	FDR	HEPG2	sirolimus	BRD-A50287119	6	10um	FDR	NPC	0.000141357	0.921298
genistein	BRD-K43797669	6	10um	FDR	NPC	sirolimus	BRD-A50287119	6	10um	FDR	NPC	0.000141848	3.19527
BRD-A59728941	BRD-A59728941	6	2.5um	FDR	HEPG2	sirolimus	BRD-A79768653	6	10um	FDR	A549	0.0001422	1.35714
lovastatin	BRD-A70155556	24	40um	FDR	A549	sirolimus	BRD-A23770159	24	11.1um	FDR	A549	0.000144065	0.667575
epoxycholesterol	BRD-K61480498	6	10um	FDR	A549	sirolimus	BRD-K99369265	6	10um	FDR	A549	0.000144119	2.10024
camptothecin	BRD-K37890730	6	1.1111um	FDR	A549	sirolimus	BRD-A79768653	6	10um	FDR	A549	0.000145039	1.20523
BRD-A62200266	BRD-A62200266	24	10um	FDR	A549	sirolimus	BRD-A23770159	6	11.1um	FDR	HEPG2	0.000145165	0.716753
BRD-A98888159	BRD-A98888159	24	10um	FDR	A549	sirolimus	BRD-K89626439	24	10um	FDR	A549	0.000145739	2.69515
rottlerin	BRD-K03816923	24	10um	FDR	A549	sirolimus	BRD-A79768653	6	10um	FDR	HEPG2	0.000145915	1.85095
hinokitiol	BRD-K37691127	6	10um	FDR	A549	sirolimus	BRD-A79768653	6	10um	FDR	A549	0.00014631	1.91427
tropisetron	BRD-K50866992	24	10um	FDR	A549	sirolimus	BRD-A79768653	6	10um	FDR	A549	0.00014631	1.91427
brazilin	BRD-A83326220	24	10um	FDR	A549	sirolimus	BRD-A79768653	24	10um	FDR	HT29	0.000147989	2.08589
tamoxifen	BRD-K43744935	24	10um	FDR	A549	sirolimus	BRD-A79768653	24	10um	FDR	HT29	0.000147989	2.08589
simvastatin	BRD-K22134346	24	10um	FDR	NPC	sirolimus	BRD-K99369265	24	10um	FDR	NPC	0.000148458	3.86807
withaferin-a	BRD-A52193669	6	10um	FDR	A549	sirolimus	BRD-K84937637	6	10um	FDR	A549	0.000148849	1.24573
emetine	BRD-A25687296	6	10um	FDR	HT29	sirolimus	BRD-A79768653	6	10um	FDR	A549	0.000149243	1.25531
geldanamycin	BRD-A19500257	6	10um	FDR	HT29	sirolimus	BRD-K99369265	6	10um	FDR	A549	0.000149396	1.5603
camptothecin	BRD-K37890730	6	0.3704um	FDR	A549	sirolimus	BRD-K84937637	6	10um	FDR	A549	0.000150926	1.24011
strophanthidin	BRD-K84595254	6	10um	FDR	A549	sirolimus	BRD-A79768653	6	10um	FDR	HT29	0.00015376	2.12137
anisomycin	BRD-K91370081	6	10um	FDR	A549	sirolimus	BRD-K99369265	6	10um	FDR	A549	0.00015601	1.53939
piceatannol	BRD-K91509126	24.4	10um	FDR	NEU.KCL	sirolimus	BRD-A79768653	6	10um	FDR	HT29	0.000156877	1.88079
tamoxifen	BRD-K93754473	24	28.39um	FDR	HT29	sirolimus	BRD-K84937637	6	10um	FDR	A549	0.000159431	1.34819
triptolide	BRD-K39484304	6	10um	FDR	HT29	sirolimus	BRD-K84937637	6	0.0046um	FDR	A549	0.000161287	2.4391
cyclosporin-a	BRD-K13533483	6	10um	FDR	A549	sirolimus	BRD-K84937637	6	10um	FDR	HEPG2	0.000162397	4.12433
camptothecin	BRD-K37890730	6	10um	FDR	A549	sirolimus	BRD-A50287119	24.4	10um	FDR	NEU.KCL	0.000162759	0.953294
geldanamycin	BRD-A19500257	6	10um	FDR	NPC	sirolimus	BRD-K84937637	24	10um	FDR	A549	0.000162997	0.81849
piperlongumine	BRD-K24132293	6	10um	FDR	HT29	sirolimus	BRD-K84937637	24	10um	FDR	A549	0.000162997	0.81849
menadione	BRD-K78126613	24	10um	FDR	NPC	sirolimus	BRD-K84937637	24	10um	FDR	NPC	0.000164838	1.53571
butein	BRD-K17497770	6	10um	FDR	A549	sirolimus	BRD-A79768653	6	10um	FDR	HT29	0.000165127	3.96819
epoxycholesterol	BRD-K61480498	24.4	10um	FDR	NEU.KCL	sirolimus	BRD-A79768653	6	10um	FDR	HT29	0.000165127	3.96819
licochalcone-a	BRD-K99667445	24	10um	FDR	NPC	sirolimus	BRD-A79768653	6	10um	FDR	HT29	0.000165127	3.96819
cyclosporin-a	BRD-A64290322	6	10um	FDR	HT29	sirolimus	BRD-K89626439	6	10um	FDR	HT29	0.000165127	3.96819
anisomycin	BRD-K91370081	6	10um	FDR	A549	sirolimus	BRD-A79768653	6	10um	FDR	HT29	0.000165564	1.70955
thapsigargin	BRD-A62809825	24	10um	FDR	A549	sirolimus	BRD-A79768653	6	10um	FDR	HT29	0.000165968	1.71369
ursolic-acid	BRD-K68185022	24	70.07um	FDR	HT29	sirolimus	BRD-K89626439	6	10um	FDR	HT29	0.000166045	3.57673
tropisetron	BRD-K50866992	24	10um	FDR	A549	sirolimus	BRD-A79768653	24	10um	FDR	A549	0.000167546	2.61166
genistein	BRD-K43797669	6	10um	FDR	HT29	sirolimus	BRD-A79768653	6	10um	FDR	HT29	0.000169865	2.29499
puromycin	BRD-K36007650	6	10um	FDR	A549	sirolimus	BRD-A79768653	6	10um	FDR	HT29	0.000171053	2.10191
radicicol	BRD-K33551950	6	10um	FDR	HT29	sirolimus	BRD-A79768653	6	10um	FDR	HT29	0.000171053	2.10191
cephaeline	BRD-K80348542	6	10um	FDR	A549	sirolimus	BRD-K84937637	6	10um	FDR	A549	0.000171239	1.1947
penitrem-a	BRD-K03842655	24	10um	FDR	NPC	sirolimus	BRD-K84937637	24	10um	FDR	A549	0.000173843	1.41318
capsaicin	BRD-K50590187	6	160um	FDR	A549	sirolimus	BRD-A79768653	6	10um	FDR	HEPG2	0.000174119	3.0424
piperlongumine	BRD-K24132293	24	10um	FDR	A549	sirolimus	BRD-A50287119	24	10um	FDR	NPC	0.000175667	1.56016
parthenolide	BRD-K98548675	24	10um	FDR	HT29	sirolimus	BRD-A23770159	24	11.1um	FDR	HT29	0.00017582	5.77559
mitomycin-c	BRD-K51418664	6	10um	FDR	HT29	sirolimus	BRD-A50287119	6	10um	FDR	NPC	0.00017824	0.838652
resveratrol	BRD-K25591257	6	10um	FDR	A549	sirolimus	BRD-A79768653	6	10um	FDR	HEPG2	0.00018076	2.55897
ellipticine	BRD-K85985071	24	10um	FDR	A549	sirolimus	BRD-K84937637	24	10um	FDR	NPC	0.000180761	1.47364
ouabain	BRD-A46747628	6	10um	FDR	HT29	sirolimus	BRD-A79768653	24	10um	FDR	HT29	0.000181495	1.55752
ouabain	BRD-A68930007	6	10um	FDR	HT29	sirolimus	BRD-A79768653	24	10um	FDR	HT29	0.000181495	1.55752
epoxycholesterol	BRD-K61480498	24	10um	FDR	A549	sirolimus	BRD-K84937637	24	10um	FDR	NPC	0.000181657	1.66236
penitrem-a	BRD-K03842655	24	10um	FDR	A549	sirolimus	BRD-A79768653	6	10um	FDR	A549	0.000181798	2.05017
BRD-K85853281	BRD-K85853281	6	10um	FDR	A549	sirolimus	BRD-A79768653	6	10um	FDR	A549	0.000183203	1.74219
sphingosine	BRD-K62959606	6	10um	FDR	A549	metformin	BRD-K79602928	6	10um	FDR	HT29	0.000184868	0.766709
gossypol	BRD-K19295594	24	11.1um	FDR	HT29	sirolimus	BRD-A79768653	6	10um	FDR	A549	0.000185501	2.28384
lovastatin	BRD-A70155556	24	40um	FDR	HT29	sirolimus	BRD-A79768653	6	10um	FDR	HT29	0.000186158	3.00531
ivermectin	BRD-A48570745	24	10um	FDR	A549	sirolimus	BRD-A79768653	6	10um	FDR	HEPG2	0.000187335	2.26003
butein	BRD-K17497770	6	10um	FDR	A549	sirolimus	BRD-K89626439	6	10um	FDR	A549	0.000188121	5.48894
penitrem-a	BRD-K03842655	6	10um	FDR	HT29	sirolimus	BRD-K89626439	6	10um	FDR	A549	0.000188121	5.48894
penitrem-a	BRD-K03842655	6	10um	FDR	HEPG2	sirolimus	BRD-K84937637	6	10um	FDR	HT29	0.000188121	5.48894
xanthohumol	BRD-K77390737	6	10um	FDR	HEPG2	sirolimus	BRD-K84937637	6	10um	FDR	HT29	0.000188121	5.48894
rotenone	BRD-K08316444	6	0.625um	FDR	HEPG2	sirolimus	BRD-A79768653	6	10um	FDR	HEPG2	0.000188357	1.62974
chloramphenicol	BRD-A51182606	6	10um	FDR	HT29	sirolimus	BRD-A50287119	6	10um	FDR	NPC	0.000190132	0.840489
piperlongumine	BRD-K24132293	6	10um	FDR	HEPG2	sirolimus	BRD-A50287119	24.4	10um	FDR	NEU.KCL	0.000190277	1.6521
rottlerin	BRD-K03816923	24	9.68um	FDR	HT29	sirolimus	BRD-A50287119	24.4	10um	FDR	NEU.KCL	0.000190392	1.04034
cortisone	BRD-K86161929	6	10um	FDR	HT29	sirolimus	BRD-K84937637	6	0.0412um	FDR	A549	0.000190569	1.65636
podophyllotoxin	BRD-K47869605	24	10um	FDR	NPC	sirolimus	BRD-A50287119	6	10um	FDR	NPC	0.000191948	0.865634
chaetocin	BRD-A85860691	6	0.08um	FDR	HEPG2	sirolimus	BRD-A23770159	6	11.1um	FDR	HEPG2	0.000195754	0.841788
doxorubicin	BRD-A76941896	24	10um	FDR	HT29	sirolimus	BRD-K84937637	6	10um	FDR	A549	0.000196953	1.16761
thapsigargin	BRD-A62809825	6	10um	FDR	HEPG2	sirolimus	BRD-A79768653	6	10um	FDR	HEPG2	0.000197013	1.63934
A-23187	BRD-K41431477	24	10um	FDR	HEPG2	sirolimus	BRD-A79768653	6	10um	FDR	HEPG2	0.000198102	1.72212
rhodomyrtoxin-b	BRD-A08003242	24	10um	FDR	A549	sirolimus	BRD-A79768653	6	10um	FDR	HT29	0.000198866	2.53869
plumbagin	BRD-K36137799	24	10um	FDR	NPC	sirolimus	BRD-A50287119	6	10um	FDR	NPC	0.000198954	0.837846
geldanamycin	BRD-A19500257	24	10um	FDR	A549	sirolimus	BRD-K99369265	6	10um	FDR	A549	0.000199363	1.6848
ritonavir	BRD-A03323675	6	10um	FDR	HT29	sirolimus	BRD-K84937637	6	10um	FDR	A549	0.000199367	1.25811
rotenone	BRD-K08316444	6	10um	FDR	NPC	sirolimus	BRD-A50287119	6	10um	FDR	NPC	0.000199987	1.29584
butein	BRD-K17497770	24	10um	FDR	NPC	sirolimus	BRD-A50287119	24.4	10um	FDR	NEU.KCL	0.000200607	1.39714
cyclosporin-a	BRD-A64290322	6	10um	FDR	A549	sirolimus	BRD-A50287119	6	10um	FDR	NPC	0.000200741	1.67475
BRD-K59946561	BRD-K59946561	6	10um	FDR	A549	sirolimus	BRD-K84937637	6	0.0015um	FDR	A549	0.000201524	2.61779
phloretin	BRD-K15563106	24	177.6um	FDR	HT29	sirolimus	BRD-A79768653	6	10um	FDR	HEPG2	0.000201667	2.04833
piceatannol	BRD-K91509126	6	10um	FDR	HEPG2	sirolimus	BRD-A79768653	24	10um	FDR	HT29	0.000201792	3.17055
thapsigargin	BRD-K69023402	24.4	10um	FDR	NEU.KCL	sirolimus	BRD-K84937637	6	10um	FDR	HT29	0.000202012	3.52968
licochalcone-a	BRD-K99667445	6	10um	FDR	NPC	sirolimus	BRD-A50287119	6	10um	FDR	NPC	0.000205984	1.79871
cephaeline	BRD-K80348542	6	10um	FDR	HT29	metformin	BRD-K79602928	6	10um	FDR	HT29	0.000206317	0.626231
arctigenin	BRD-K53523901	6	10um	FDR	HEPG2	sirolimus	BRD-A79768653	6	10um	FDR	A549	0.000207946	1.53465
parthenolide	BRD-K28120222	24	10um	FDR	NPC	sirolimus	BRD-A79768653	24	10um	FDR	A549	0.000208027	2.14658
geldanamycin	BRD-A19500257	6	10um	FDR	HT29	sirolimus	BRD-K84937637	6	10um	FDR	A549	0.000208431	1.19843
piperlongumine	BRD-K24132293	6	10um	FDR	HT29	sirolimus	BRD-A50287119	24.4	10um	FDR	NEU.KCL	0.000209682	1.076
rottlerin	BRD-K03816923	24	9.68um	FDR	A549	sirolimus	BRD-A79768653	6	10um	FDR	HEPG2	0.000210165	1.56511
westcort	BRD-A23290232	6	10um	FDR	A549	sirolimus	BRD-K84937637	6	0.3704um	FDR	A549	0.000210446	3.71287
disulfiram	BRD-K32744045	6	10um	FDR	HT29	sirolimus	BRD-A79768653	6	10um	FDR	A549	0.000212366	1.4046
doxorubicin	BRD-A76941896	6	10um	FDR	A549	sirolimus	BRD-K84937637	6	0.0046um	FDR	A549	0.000217016	2.41195
arctigenin	BRD-K53523901	6	2.5um	FDR	HEPG2	sirolimus	BRD-A79768653	6	10um	FDR	HEPG2	0.000217583	1.58249
ivermectin	BRD-A48570745	24	10um	FDR	A549	sirolimus	BRD-A79768653	24	10um	FDR	A549	0.000218805	2.54699
xanthohumol	BRD-K77390737	24	10um	FDR	A549	sirolimus	BRD-K89626439	6	10um	FDR	HT29	0.000218851	3.86073
rhodomyrtoxin-b	BRD-A08003242	24	10um	FDR	HT29	sirolimus	BRD-K99369265	6	10um	FDR	A549	0.00021901	1.57633
paroxetine	BRD-K37991163	24	10um	FDR	NPC	sirolimus	BRD-A50287119	24	10um	FDR	NPC	0.000219126	2.57628
parthenolide	BRD-K81651477	24	20um	FDR	HT29	sirolimus	BRD-A50287119	24.4	10um	FDR	NEU.KCL	0.000219392	1.32796
cytosporone-b	BRD-K86191271	6	10um	FDR	HEPG2	sirolimus	BRD-A23770159	6	11.1um	FDR	HEPG2	0.00021967	2.11755
trichostatin-a	BRD-K68202742	6	10um	FDR	HT29	sirolimus	BRD-K84937637	6	10um	FDR	A549	0.000219679	1.27833
cyclosporin-a	BRD-A64290322	6	10um	FDR	HT29	sirolimus	BRD-K84937637	6	10um	FDR	A549	0.000220833	2.24016
idarubicin	BRD-A71390734	24	0.08um	FDR	A549	sirolimus	BRD-A79768653	24	10um	FDR	A549	0.000220972	1.99096
ouabain	BRD-A68930007	24	10um	FDR	NPC	sirolimus	BRD-K84937637	24	10um	FDR	NPC	0.000221449	1.3198
rottlerin	BRD-K03816923	24	9.68um	FDR	A549	sirolimus	BRD-A79768653	6	10um	FDR	A549	0.00022182	1.15998
progesterone	BRD-K64994968	24	10um	FDR	NPC	sirolimus	BRD-A79768653	6	10um	FDR	HEPG2	0.000222238	2.5066
alimemazine	BRD-A49225603	24	10um	FDR	HT29	sirolimus	BRD-K84937637	6	0.3704um	FDR	A549	0.000223093	3.03495
homoharringtonine	BRD-K76674262	24	10um	FDR	A549	sirolimus	BRD-A79768653	6	10um	FDR	A549	0.000223437	1.14058
cyclosporin-a	BRD-A64290322	6	10um	FDR	HEPG2	sirolimus	BRD-K99369265	6	10um	FDR	HEPG2	0.000225899	5.6204
rotenone	BRD-K08316444	24	10um	FDR	NPC	sirolimus	BRD-A79768653	6	10um	FDR	HEPG2	0.00022632	1.88775
cyclosporin-a	BRD-A64290322	6	10um	FDR	A549	sirolimus	BRD-K84937637	6	10um	FDR	HEPG2	0.000227157	3.99855
capsaicin	BRD-K50590187	6	160um	FDR	HEPG2	sirolimus	BRD-A50287119	24.4	10um	FDR	NEU.KCL	0.000227977	2.08849
doxorubicin	BRD-A52530684	6	10um	FDR	HEPG2	sirolimus	BRD-A79768653	6	10um	FDR	HEPG2	0.000229748	1.57582
puromycin	BRD-K36007650	6	10um	FDR	HT29	sirolimus	BRD-K84937637	6	10um	FDR	A549	0.000230808	1.17073
1-monopalmitin	BRD-A80928489	24	10um	FDR	A549	metformin	BRD-K79602928	6	10um	FDR	HT29	0.0002322	1.27787
tamoxifen	BRD-K93754473	24	28.39um	FDR	HT29	sirolimus	BRD-K89626439	6	10um	FDR	A549	0.000233748	Inf
hydrocortisone	BRD-A25143711	24	10um	FDR	A549	sirolimus	BRD-K84937637	6	0.3704um	FDR	A549	0.000235716	2.69706
oligomycin-a	BRD-A81541225	6	10um	FDR	A549	sirolimus	BRD-A79768653	6	10um	FDR	HT29	0.000236962	2.49505
epirubicin	BRD-A56518012	6	10um	FDR	NPC	sirolimus	BRD-A50287119	24.4	10um	FDR	NEU.KCL	0.000237405	0.90046
triptolide	BRD-K39484304	6	10um	FDR	A549	sirolimus	BRD-A79768653	6	10um	FDR	A549	0.000240532	1.13662
tretinoin	BRD-K64634304	24	40um	FDR	A549	sirolimus	BRD-A23770159	24	11.1um	FDR	A549	0.000242478	1.25298
plumbagin	BRD-K36137799	6.4	10um	FDR	NEU.KCL	sirolimus	BRD-A50287119	6.4	10um	FDR	NEU.KCL	0.000242922	2.05237
prostratin	BRD-K91145395	24	10um	FDR	A549	sirolimus	BRD-A79768653	24	10um	FDR	A549	0.000243405	2.01431
cyclosporin-a	BRD-A69815203	6	10um	FDR	A549	sirolimus	BRD-K84937637	6	10um	FDR	A549	0.000244564	2.54988
epinephrine	BRD-A07765530	6	10um	FDR	A549	sirolimus	BRD-A79768653	6	10um	FDR	HT29	0.000244728	2.91724
hinokitiol	BRD-K37691127	24	10um	FDR	A549	sirolimus	BRD-K84937637	6	3.3333um	FDR	A549	0.000244728	2.91724
A-23187	BRD-K41431477	24	10um	FDR	HEPG2	sirolimus	BRD-K84937637	24	10um	FDR	A549	0.000248416	0.623175
triptolide	BRD-K39484304	6	10um	FDR	HT29	sirolimus	BRD-K84937637	6	10um	FDR	A549	0.000248981	1.51174
narciclasine	BRD-K06792661	6	10um	FDR	A549	sirolimus	BRD-K99369265	6	10um	FDR	A549	0.00024965	1.52882
cyclosporin-a	BRD-A64290322	6	10um	FDR	HT29	sirolimus	BRD-A79768653	6	10um	FDR	A549	0.000250512	2.21375
cyclosporin-a	BRD-A38030642	6	10um	FDR	A549	sirolimus	BRD-A23770159	6	11.1um	FDR	A549	0.000250512	2.21375
paroxetine	BRD-K37991163	6	10um	FDR	A549	sirolimus	BRD-A79768653	6	10um	FDR	A549	0.000250512	2.21375
thapsigargin	BRD-K69023402	24	10um	FDR	HT29	sirolimus	BRD-K84937637	6	10um	FDR	HT29	0.000257178	Inf
hydrastinine	BRD-K92726801	6	10um	FDR	A549	sirolimus	BRD-K89626439	24	10um	FDR	A549	0.000257662	1.5087
arctigenin	BRD-K53523901	24	10um	FDR	HEPG2	sirolimus	BRD-A79768653	6	10um	FDR	HEPG2	0.00026211	1.58676
brefeldin-a	BRD-A17065207	6	10um	FDR	HEPG2	sirolimus	BRD-K89626439	6	10um	FDR	A549	0.000263007	5.26476
cyclosporin-a	BRD-K13533483	6	10um	FDR	HT29	sirolimus	BRD-K89626439	6	10um	FDR	A549	0.000263007	5.26476
oligomycin-c	BRD-K05350981	6	10um	FDR	HT29	sirolimus	BRD-K89626439	6	10um	FDR	A549	0.000263007	5.26476
thiostrepton	BRD-A20697603	6	10um	FDR	A549	sirolimus	BRD-K89626439	6	10um	FDR	A549	0.000263007	5.26476
mitomycin-c	BRD-A48237631	6	10um	FDR	HEPG2	sirolimus	BRD-K84937637	6	10um	FDR	A549	0.000263481	1.33378
17-hydroxyprogesterone-caproate	BRD-A29731977	6	10um	FDR	HT29	sirolimus	BRD-A79768653	6	10um	FDR	HT29	0.000265094	1.65086
ursolic-acid	BRD-K68185022	6	70.07um	FDR	A549	sirolimus	BRD-A50287119	6	10um	FDR	NPC	0.00026881	1.05812
calycanthine	BRD-K59851896	6	10um	FDR	A549	sirolimus	BRD-A79768653	6	10um	FDR	A549	0.000272213	2.5241
geranylgeraniol	BRD-K95402279	6.4	10um	FDR	NEU.KCL	sirolimus	BRD-A50287119	24.4	10um	FDR	NEU.KCL	0.000273626	1.85607
tacrolimus	BRD-K44094599	24	10um	FDR	A549	sirolimus	BRD-A79768653	24	10um	FDR	A549	0.000278286	2.09323
chaetocin	BRD-A85860691	6	0.08um	FDR	HT29	sirolimus	BRD-A79768653	24	10um	FDR	HT29	0.000279443	1.67677
piperlongumine	BRD-K24132293	24	10um	FDR	NPC	sirolimus	BRD-K84937637	24	10um	FDR	NPC	0.000279864	1.32894
geldanamycin	BRD-A19500257	6	10um	FDR	A549	sirolimus	BRD-K84937637	6	10um	FDR	HT29	0.000282033	3.44891
hydroxycholesterol	BRD-K35307346	6	10um	FDR	NPC	sirolimus	BRD-A79768653	6	10um	FDR	HT29	0.000283091	2.00933
camptothecin	BRD-K37890730	6	1.1111um	FDR	A549	metformin	BRD-K79602928	6	10um	FDR	HT29	0.000283221	0.687639
gossypol	BRD-K19295594	24	11.1um	FDR	HT29	sirolimus	BRD-A50287119	6	10um	FDR	NPC	0.000284506	1.89597
brefeldin-a	BRD-A31107743	6	0.09um	FDR	HT29	sirolimus	BRD-A79768653	6	10um	FDR	HT29	0.000284964	3.67946
cyclosporin-a	BRD-K13533483	24	10um	FDR	A549	sirolimus	BRD-A79768653	6	10um	FDR	HT29	0.000284964	3.67946
hydrocortisone	BRD-A25143711	6	10um	FDR	A549	sirolimus	BRD-A79768653	6	10um	FDR	HT29	0.000284964	3.67946
rottlerin	BRD-K03816923	24	10um	FDR	A549	sirolimus	BRD-A79768653	24	10um	FDR	HT29	0.000285423	1.4314
camptothecin	BRD-K37890730	6	3.3333um	FDR	A549	sirolimus	BRD-K84937637	6	10um	FDR	A549	0.000285427	1.25071
chaetocin	BRD-A85860691	6	0.08um	FDR	A549	sirolimus	BRD-K99369265	6	10um	FDR	A549	0.000286297	1.83378
thiostrepton	BRD-A20697603	6	10um	FDR	HEPG2	sirolimus	BRD-K99369265	6	10um	FDR	A549	0.000286297	1.83378
cerulenin	BRD-K52075040	24	44.4um	FDR	A549	sirolimus	BRD-A79768653	24	10um	FDR	HT29	0.000288797	1.95476
brefeldin-a	BRD-A31107743	6	0.09um	FDR	HEPG2	sirolimus	BRD-A79768653	6	10um	FDR	HT29	0.000291705	1.67612
ursolic-acid	BRD-K68185022	24	70.07um	FDR	A549	metformin	BRD-K79602928	6	10um	FDR	HT29	0.000296098	0.607696
rhodomyrtoxin-b	BRD-A08003242	24	10um	FDR	HT29	sirolimus	BRD-A79768653	6	10um	FDR	A549	0.000296871	1.21323
apicidin	BRD-A63989068	24	10um	FDR	NPC	sirolimus	BRD-A79768653	6	10um	FDR	A549	0.000298466	1.12455
cycloheximide	BRD-K36055864	6	10um	FDR	A549	sirolimus	BRD-A79768653	6	10um	FDR	A549	0.000298607	1.56603
camptothecin	BRD-K37890730	6	0.3704um	FDR	A549	sirolimus	BRD-K84937637	6	0.0412um	FDR	A549	0.000299773	1.52113
ivermectin	BRD-A48570745	24	10um	FDR	A549	sirolimus	BRD-K99369265	6	10um	FDR	A549	0.000302494	2.15249
thapsigargin	BRD-K69023402	24	10um	FDR	A549	sirolimus	BRD-A79768653	6	10um	FDR	A549	0.000302562	1.66283
daunorubicin	BRD-A68009927	6	10um	FDR	A549	sirolimus	BRD-A79768653	6	10um	FDR	A549	0.000305086	1.15103
cycloheximide	BRD-K36055864	24	10um	FDR	HEPG2	sirolimus	BRD-A79768653	6	10um	FDR	A549	0.000307494	1.11998
HO-013	BRD-K86465814	24	10um	FDR	A549	sirolimus	BRD-A23770159	24	11.1um	FDR	A549	0.000308273	0.954885
epoxycholesterol	BRD-K61480498	24	10um	FDR	A549	sirolimus	BRD-K84937637	24	10um	FDR	A549	0.000308851	0.974234
cyclosporin-a	BRD-A38030642	24	10um	FDR	NPC	sirolimus	BRD-A50287119	24.4	10um	FDR	NEU.KCL	0.00030913	0.900452
camptothecin	BRD-K37890730	6	1.1111um	FDR	A549	sirolimus	BRD-A79768653	6	10um	FDR	HT29	0.000309151	1.64157
camptothecin	BRD-K37890730	6	1.1111um	FDR	A549	sirolimus	BRD-K84937637	6	3.3333um	FDR	A549	0.000309151	1.64157
ursolic-acid	BRD-K68185022	6	70.07um	FDR	A549	sirolimus	BRD-A79768653	6	10um	FDR	HEPG2	0.000309244	1.73641
homoharringtonine	BRD-K76674262	24	2.5um	FDR	HEPG2	sirolimus	BRD-K84937637	24	10um	FDR	A549	0.000309543	0.621903
piceatannol	BRD-K26241953	6	10um	FDR	HEPG2	sirolimus	BRD-A79768653	24	10um	FDR	HT29	0.000309704	4.24707
pioglitazone	BRD-A48430263	6	10um	FDR	HT29	sirolimus	BRD-A79768653	24	10um	FDR	HT29	0.000309704	4.24707
sappanone-a	BRD-K03557653	6	10um	FDR	HT29	sirolimus	BRD-A79768653	24	10um	FDR	HT29	0.000309704	4.24707
xanthohumol	BRD-K77390737	6	10um	FDR	HEPG2	sirolimus	BRD-A79768653	24	10um	FDR	HT29	0.000309704	4.24707
prostaglandin-e1	BRD-K52459643	6	10um	FDR	HEPG2	sirolimus	BRD-K89626439	6	10um	FDR	HT29	0.000312675	5.08244
radicicol	BRD-K33551950	24	10um	FDR	NPC	sirolimus	BRD-K84937637	24	10um	FDR	A549	0.000312801	0.689439
arctigenin	BRD-K53523901	24	10um	FDR	HEPG2	sirolimus	BRD-K84937637	6	10um	FDR	A549	0.000313749	1.11963
geldanamycin	BRD-A19500257	6	10um	FDR	NPC	sirolimus	BRD-K84937637	24	10um	FDR	NPC	0.000314986	1.40701
doxorubicin	BRD-K92093830	24	10um	FDR	A549	sirolimus	BRD-A50287119	24	10um	FDR	NPC	0.000316639	1.17249
cyclosporin-a	BRD-K13533483	6	10um	FDR	A549	sirolimus	BRD-K89626439	6	10um	FDR	HT29	0.00031904	3.7178
oligomycin-a	BRD-A81541225	6	10um	FDR	HT29	sirolimus	BRD-K99369265	6	10um	FDR	A549	0.00031904	3.7178
gossypol	BRD-K19295594	24	11.1um	FDR	A549	sirolimus	BRD-K84937637	6	10um	FDR	A549	0.000322193	1.14431
trichostatin-a	BRD-A19037878	24	10um	FDR	A549	sirolimus	BRD-K84937637	24	10um	FDR	A549	0.000323017	0.648242
piperlongumine	BRD-K24132293	24	10um	FDR	A549	sirolimus	BRD-K84937637	24	10um	FDR	A549	0.000327066	0.9915
idarubicin	BRD-K69650333	6	10um	FDR	HT29	sirolimus	BRD-A79768653	6	10um	FDR	A549	0.000327894	1.35225
C2-dihydroceramide	BRD-K62910157	24.4	10um	FDR	NEU.KCL	sirolimus	BRD-A50287119	6	10um	FDR	NPC	0.000330206	0.882494
epothilone	BRD-K48935217	24	10um	FDR	A549	sirolimus	BRD-K89626439	24	10um	FDR	A549	0.000332101	4.2213
reserpine	BRD-K95921201	6	10um	FDR	HEPG2	sirolimus	BRD-K89626439	24	10um	FDR	A549	0.000332101	4.2213
salsoline	BRD-A48323445	6	10um	FDR	NPC	sirolimus	BRD-K89626439	24	10um	FDR	A549	0.000332101	4.2213
staurosporine	BRD-K17953061	6	10um	FDR	HEPG2	sirolimus	BRD-A50287119	24.4	10um	FDR	NEU.KCL	0.00033289	0.937527
daunorubicin	BRD-K43389675	24	10um	FDR	A549	sirolimus	BRD-K84937637	6	0.0412um	FDR	A549	0.000333224	1.76981
brefeldin-a	BRD-A17065207	6	10um	FDR	HT29	sirolimus	BRD-K84937637	24	10um	FDR	A549	0.000333916	0.743498
piperlongumine	BRD-K24132293	6	10um	FDR	HT29	sirolimus	BRD-K99369265	6	10um	FDR	A549	0.000333951	1.56773
thiostrepton	BRD-A20697603	6	10um	FDR	HT29	sirolimus	BRD-K84937637	6	10um	FDR	HEPG2	0.000337053	3.85121
puromycin	BRD-K36007650	6	10um	FDR	HT29	sirolimus	BRD-A50287119	6	10um	FDR	NPC	0.00033911	0.839289
mitomycin-c	BRD-A48237631	6	10um	FDR	HEPG2	sirolimus	BRD-K84937637	24	10um	FDR	A549	0.000341465	0.848957
doxorubicin	BRD-A52530684	6	10um	FDR	HEPG2	metformin	BRD-K79602928	6	10um	FDR	HT29	0.000342168	0.686784
cephaeline	BRD-K80348542	6	10um	FDR	A549	sirolimus	BRD-A79768653	6	10um	FDR	A549	0.000348685	1.15252
aspirin	BRD-K11433652	6	10um	FDR	HT29	sirolimus	BRD-K84937637	6	0.0412um	FDR	A549	0.000348773	1.70771
trichostatin-a	BRD-A19037878	6	10um	FDR	NPC	sirolimus	BRD-A79768653	6	10um	FDR	A549	0.000350944	1.11562
brazilin	BRD-A83326220	6	10um	FDR	HEPG2	sirolimus	BRD-A79768653	24	10um	FDR	HT29	0.000351593	2.94633
cyclosporin-a	BRD-A64290322	6	10um	FDR	HEPG2	sirolimus	BRD-A79768653	24	10um	FDR	HT29	0.000351593	2.94633
isoliquiritigenin	BRD-K33583600	24	10um	FDR	HT29	sirolimus	BRD-A79768653	24	10um	FDR	HT29	0.000351593	2.94633
ouabain	BRD-A68930007	24	10um	FDR	A549	sirolimus	BRD-A79768653	6	10um	FDR	HT29	0.000356666	1.69157
rottlerin	BRD-K03816923	24	9.68um	FDR	A549	sirolimus	BRD-A23770159	24	11.1um	FDR	A549	0.00035757	0.605163
tamoxifen	BRD-K93754473	6	10um	FDR	NPC	sirolimus	BRD-A79768653	6	10um	FDR	A549	0.000358573	1.16058
capsaicin	BRD-K50590187	24.4	10um	FDR	NEU.KCL	sirolimus	BRD-A50287119	24.4	10um	FDR	NEU.KCL	0.000359025	2.24198
radicicol	BRD-K33551950	6	10um	FDR	A549	sirolimus	BRD-A79768653	6	10um	FDR	HT29	0.000359641	1.61899
piceatannol	BRD-K91509126	24	10um	FDR	NPC	sirolimus	BRD-A50287119	6	10um	FDR	NPC	0.000361192	0.812634
rottlerin	BRD-K03816923	24	10um	FDR	A549	sirolimus	BRD-A50287119	24	10um	FDR	NPC	0.000362434	1.39848
cyclosporin-a	BRD-A38030642	24	10um	FDR	A549	sirolimus	BRD-K84937637	6	10um	FDR	HT29	0.000366032	3.27825
geldanamycin	BRD-K11528507	6	10um	FDR	NPC	sirolimus	BRD-K84937637	24	10um	FDR	NPC	0.000366875	1.32047
anisomycin	BRD-K91370081	6	10um	FDR	A549	sirolimus	BRD-A50287119	24	10um	FDR	NPC	0.000368826	1.1501
lasalocid	BRD-A72711497	24	10um	FDR	HT29	sirolimus	BRD-A79768653	24	10um	FDR	HT29	0.00036887	1.53839
epothilone	BRD-K48935217	24	10um	FDR	NPC	sirolimus	BRD-K84937637	24	10um	FDR	NPC	0.000369089	3.81736
alimemazine	BRD-A49225603	24	10um	FDR	HT29	sirolimus	BRD-K84937637	6	10um	FDR	HEPG2	0.000369089	3.81736
mead-acid	BRD-K96144918	6	10um	FDR	HT29	metformin	BRD-K79602928	6	10um	FDR	HT29	0.000371515	0.740566
heliomycin	BRD-K64517075	6	10um	FDR	HT29	sirolimus	BRD-K84937637	6	0.0137um	FDR	A549	0.000372762	1.13315
geldanamycin	BRD-A19500257	6	10um	FDR	NPC	sirolimus	BRD-K89626439	6	10um	FDR	A549	0.000373742	Inf
camptothecin	BRD-K37890730	6	1.1111um	FDR	A549	sirolimus	BRD-K84937637	6	1.1111um	FDR	A549	0.000374607	1.43297
BRD-A62200266	BRD-A62200266	24	10um	FDR	A549	sirolimus	BRD-A50287119	24.4	10um	FDR	NEU.KCL	0.000377812	0.855762
rotenone	BRD-K08316444	6	0.625um	FDR	HEPG2	sirolimus	BRD-A79768653	6	10um	FDR	A549	0.000379385	1.20683
cyclosporin-a	BRD-A38030642	6	10um	FDR	A549	sirolimus	BRD-K89626439	6	10um	FDR	A549	0.000380041	4.17152
desoxycortone	BRD-K98521173	6	10um	FDR	A549	sirolimus	BRD-A79768653	6	10um	FDR	A549	0.000380041	4.17152
simvastatin	BRD-K22134346	6	10um	FDR	HEPG2	sirolimus	BRD-A79768653	6	10um	FDR	A549	0.000380041	4.17152
xanthohumol	BRD-K77390737	6	10um	FDR	HEPG2	sirolimus	BRD-A79768653	6	10um	FDR	A549	0.000380041	4.17152
doxorubicin	BRD-K92093830	24	10um	FDR	A549	sirolimus	BRD-K84937637	6	10um	FDR	A549	0.000381185	1.12453
anisomycin	BRD-K82261406	24.4	10um	FDR	NEU.KCL	metformin	BRD-K79602928	6	10um	FDR	HT29	0.00038262	0.686688
triptolide	BRD-K39484304	6	10um	FDR	HT29	sirolimus	BRD-K84937637	6	0.3704um	FDR	A549	0.000383835	2.58066
geldanamycin	BRD-A19500257	6	10um	FDR	A549	sirolimus	BRD-K89626439	6	10um	FDR	A549	0.000384898	Inf
paroxetine	BRD-K37991163	6	10um	FDR	HEPG2	sirolimus	BRD-K89626439	24	10um	FDR	A549	0.000385117	2.91993
cerulenin	BRD-K52075040	24	44.4um	FDR	A549	sirolimus	BRD-A79768653	6	10um	FDR	HT29	0.000385308	2.37404
brefeldin-a	BRD-A84228258	6	10um	FDR	NPC	sirolimus	BRD-K84937637	6	10um	FDR	HT29	0.000386578	3.26255
prostratin	BRD-K91145395	6	10um	FDR	HT29	sirolimus	BRD-A50287119	24	10um	FDR	NPC	0.000387656	1.20609
bufalin	BRD-K63606607	24	10um	FDR	NPC	sirolimus	BRD-K84937637	24	10um	FDR	NPC	0.000388019	1.26851
dihydrocapsaicin	BRD-K45882009	24.4	10um	FDR	NEU.KCL	sirolimus	BRD-K84937637	6	10um	FDR	A549	0.000388206	1.89849
reserpine	BRD-K95921201	6	10um	FDR	HT29	sirolimus	BRD-K84937637	6	10um	FDR	A549	0.000388462	1.334
methyl-2,5-dihydroxycinnamate	BRD-K88741031	24	10um	FDR	NPC	sirolimus	BRD-A79768653	6	10um	FDR	HT29	0.000392379	1.82749
cortisone	BRD-K86161929	6	10um	FDR	HT29	sirolimus	BRD-K84937637	6	0.0137um	FDR	A549	0.000393239	1.25276
emetine	BRD-K03067624	6	10um	FDR	HEPG2	sirolimus	BRD-A50287119	6	10um	FDR	NPC	0.000394076	0.792726
geldanamycin	BRD-K11528507	24	10um	FDR	NPC	metformin	BRD-K79602928	6	10um	FDR	HT29	0.000395267	0.602585
epothilone-a	BRD-K71823332	24	10um	FDR	NPC	sirolimus	BRD-A50287119	6	10um	FDR	NPC	0.000398306	0.852093
cymarin	BRD-A71459254	24	10um	FDR	NPC	sirolimus	BRD-A50287119	24.4	10um	FDR	NEU.KCL	0.000399838	0.936917
lovastatin	BRD-K09416995	24	10um	FDR	A549	sirolimus	BRD-A79768653	6	10um	FDR	HT29	0.000399997	2.76097
rotenone	BRD-K08316444	6	0.63um	FDR	A549	sirolimus	BRD-A79768653	6	10um	FDR	HT29	0.000399997	2.76097
thapsigargin	BRD-K69023402	24	10um	FDR	A549	sirolimus	BRD-A79768653	6	10um	FDR	HT29	0.000402354	2.11406
homoharringtonine	BRD-K76674262	24	10um	FDR	A549	sirolimus	BRD-K84937637	6	10um	FDR	A549	0.00040432	1.0977
gossypol	BRD-K19295594	24	11.1um	FDR	HT29	sirolimus	BRD-K84937637	24	10um	FDR	NPC	0.000404526	2.36605
rottlerin	BRD-K03816923	24	9.68um	FDR	A549	sirolimus	BRD-K84937637	6	10um	FDR	A549	0.000407612	1.11321
idarubicin	BRD-K69650333	6	10um	FDR	HT29	sirolimus	BRD-K84937637	6	0.1235um	FDR	A549	0.000409072	1.68292
A-23187	BRD-K41431477	24	10um	FDR	HEPG2	sirolimus	BRD-A79768653	6	10um	FDR	HT29	0.000409386	1.83062
caffeic-acid-phenethyl-ester	BRD-K96188950	6	17.5867um	FDR	HEPG2	sirolimus	BRD-K84937637	6	10um	FDR	A549	0.000409939	1.38045
cycloheximide	BRD-K36055864	24	10um	FDR	A549	sirolimus	BRD-K89626439	24	10um	FDR	A549	0.000410408	1.21596
chaetocin	BRD-A85860691	6	0.08um	FDR	A549	sirolimus	BRD-A23770159	6	11.1um	FDR	A549	0.000410503	1.94031
capsaicin	BRD-K50590187	24	160um	FDR	HT29	sirolimus	BRD-A23770159	24	11.1um	FDR	HT29	0.000413293	5.26062
chloramphenicol	BRD-A51182606	6	10um	FDR	HT29	sirolimus	BRD-K84937637	6	0.0412um	FDR	A549	0.000413707	1.51607
emetine	BRD-K03067624	24	2.5um	FDR	HEPG2	sirolimus	BRD-K84937637	24	10um	FDR	A549	0.000415508	0.606143
hydrastinine	BRD-K92726801	6	10um	FDR	A549	sirolimus	BRD-A50287119	6	10um	FDR	NPC	0.000415552	1.12902
rotenone	BRD-K08316444	24	10um	FDR	NPC	sirolimus	BRD-A50287119	6	10um	FDR	NPC	0.000415552	1.12902
daunorubicin	BRD-A68009927	6	10um	FDR	HEPG2	sirolimus	BRD-K84937637	6	3.3333um	FDR	A549	0.00041629	1.73079
prostratin	BRD-K91145395	24	10um	FDR	A549	sirolimus	BRD-A79768653	6	10um	FDR	HT29	0.00041629	1.73079
cyclosporin-a	BRD-K13533483	6	10um	FDR	A549	sirolimus	BRD-A50287119	6	10um	FDR	NPC	0.000416663	1.67124
plumbagin	BRD-K36137799	24.4	10um	FDR	NEU.KCL	metformin	BRD-K79602928	6	10um	FDR	HT29	0.000418885	0.594771
cyclosporin-a	BRD-A64290322	6	10um	FDR	HEPG2	sirolimus	BRD-K84937637	6	10um	FDR	A549	0.000420901	2.89416
epigallocatechin	BRD-K19216856	6	88.8um	FDR	A549	sirolimus	BRD-A50287119	6	10um	FDR	NPC	0.000422991	1.81478
prostratin	BRD-K91145395	24	10um	FDR	A549	sirolimus	BRD-A50287119	24	10um	FDR	NPC	0.000428946	1.28041
curcumin	BRD-K07572174	6	0.0137um	FDR	A549	sirolimus	BRD-A79768653	6	10um	FDR	HEPG2	0.000429614	3.52215
cyclosporin-a	BRD-K13533483	24	10um	FDR	A549	sirolimus	BRD-A79768653	6	10um	FDR	HEPG2	0.000429614	3.52215
thiostrepton	BRD-A20697603	6	10um	FDR	A549	sirolimus	BRD-A79768653	6	10um	FDR	HEPG2	0.000429614	3.52215
alimemazine	BRD-A49225603	24	10um	FDR	HT29	sirolimus	BRD-A79768653	24	10um	FDR	HT29	0.000431818	1.87559
thapsigargin	BRD-A62809825	6	10um	FDR	A549	sirolimus	BRD-K89626439	6	10um	FDR	A549	0.00043204	Inf
retinyl	BRD-K65331431	6	10um	FDR	A549	metformin	BRD-K79602928	6	10um	FDR	HT29	0.000432257	0.769109
xanthohumol	BRD-K77390737	24	10um	FDR	A549	sirolimus	BRD-A79768653	6	10um	FDR	A549	0.000433625	2.0864
tacrolimus	BRD-K65261396	24	10um	FDR	NPC	metformin	BRD-K79602928	6	10um	FDR	HT29	0.000435882	0.726696
brefeldin-a	BRD-A17065207	6	10um	FDR	HEPG2	sirolimus	BRD-K84937637	6	10um	FDR	HEPG2	0.000436844	4.85826
cyclosporin-a	BRD-K13533483	24	10um	FDR	A549	sirolimus	BRD-K84937637	6	10um	FDR	HEPG2	0.000436844	4.85826
ivermectin	BRD-A48570745	6	10um	FDR	HEPG2	sirolimus	BRD-K84937637	6	10um	FDR	HEPG2	0.000436844	4.85826
oligomycin-c	BRD-K05350981	6	10um	FDR	HT29	sirolimus	BRD-K84937637	6	10um	FDR	HEPG2	0.000436844	4.85826
clomifene	BRD-K04218075	6	10um	FDR	HT29	sirolimus	BRD-A79768653	6	10um	FDR	HT29	0.000441362	Inf
lovastatin	BRD-K09416995	6	10um	FDR	NPC	sirolimus	BRD-A79768653	6	10um	FDR	HT29	0.000441362	Inf
lovastatin	BRD-A70155556	6	40um	FDR	HT29	sirolimus	BRD-A79768653	6	10um	FDR	HT29	0.000441362	Inf
nelfinavir	BRD-K60460488	6	10um	FDR	HT29	sirolimus	BRD-A79768653	6	10um	FDR	HT29	0.000441362	Inf
paxilline	BRD-K38251852	24	10um	FDR	HT29	sirolimus	BRD-A79768653	6	10um	FDR	HT29	0.000441362	Inf
piceatannol	BRD-K91509126	6	10um	FDR	A549	sirolimus	BRD-A79768653	6	10um	FDR	HT29	0.000441362	Inf
progesterone	BRD-K64994968	6	10um	FDR	A549	sirolimus	BRD-A79768653	6	10um	FDR	HT29	0.000441362	Inf
quinidine	BRD-K59632282	6	10um	FDR	HT29	sirolimus	BRD-A79768653	6	10um	FDR	HT29	0.000441362	Inf
rhamnetin	BRD-K37206356	6	10um	FDR	HEPG2	sirolimus	BRD-A79768653	6	10um	FDR	HT29	0.000441362	Inf
rottlerin	BRD-K03816923	6	10um	FDR	HT29	sirolimus	BRD-A79768653	6	10um	FDR	HT29	0.000441362	Inf
rottlerin	BRD-K39256324	6	10um	FDR	HT29	sirolimus	BRD-A79768653	6	10um	FDR	HT29	0.000441362	Inf
theophylline	BRD-K97799481	6	10um	FDR	A549	sirolimus	BRD-A79768653	6	10um	FDR	HT29	0.000441362	Inf
rosiglitazone	BRD-A97437073	24	80um	FDR	A549	sirolimus	BRD-A79768653	6	10um	FDR	HEPG2	0.000441381	1.55769
epirubicin	BRD-A56518012	6	10um	FDR	NPC	sirolimus	BRD-A79768653	6	10um	FDR	A549	0.000441393	1.07863
yohimbine	BRD-A51410489	6	10um	FDR	A549	metformin	BRD-K79602928	6	10um	FDR	HT29	0.00044574	0.590926
penitrem-a	BRD-K03842655	24	10um	FDR	NPC	sirolimus	BRD-A79768653	6	10um	FDR	HT29	0.0004478	2.3366
thapsigargin	BRD-A62809825	24	10um	FDR	A549	sirolimus	BRD-A50287119	24.4	10um	FDR	NEU.KCL	0.000447827	0.873731
puromycin	BRD-K36007650	6	10um	FDR	A549	sirolimus	BRD-A50287119	6	10um	FDR	NPC	0.000448157	1.20211
piceatannol	BRD-K91509126	6	10um	FDR	HEPG2	sirolimus	BRD-A79768653	6	10um	FDR	HT29	0.00044962	3.45526
cyclosporin-a	BRD-A64290322	6	10um	FDR	HEPG2	sirolimus	BRD-K89626439	6	10um	FDR	A549	0.000449632	4.92622
penitrem-a	BRD-K03842655	6	10um	FDR	A549	sirolimus	BRD-K89626439	6	10um	FDR	A549	0.000449632	4.92622
piceatannol	BRD-K91509126	24.4	10um	FDR	NEU.KCL	sirolimus	BRD-A50287119	24	10um	FDR	NPC	0.000449704	1.31869
rottlerin	BRD-K03816923	6	10um	FDR	NPC	sirolimus	BRD-A50287119	24	10um	FDR	NPC	0.000451429	1.5074
cephaeline	BRD-K80348542	6	10um	FDR	A549	sirolimus	BRD-A23770159	6	11.1um	FDR	A549	0.000452404	1.59097
cerulenin	BRD-K52075040	6	44.4um	FDR	HEPG2	sirolimus	BRD-A79768653	6	10um	FDR	HEPG2	0.000452897	1.6771
eicosatrienoic-acid	BRD-K63913457	6	10um	FDR	A549	metformin	BRD-K79602928	6	10um	FDR	HT29	0.000458197	0.992886
penitrem-a	BRD-K03842655	6	10um	FDR	A549	sirolimus	BRD-A79768653	6	10um	FDR	A549	0.000459036	2.86898
anisomycin	BRD-K91370081	6	10um	FDR	HEPG2	sirolimus	BRD-K84937637	24	10um	FDR	A549	0.000460139	1.11472
thapsigargin	BRD-A62809825	6	10um	FDR	A549	sirolimus	BRD-K99369265	6	10um	FDR	A549	0.000464001	1.52273
cymarin	BRD-A71459254	6	10um	FDR	A549	sirolimus	BRD-K84937637	24	10um	FDR	A549	0.000466478	0.914136
penitrem-a	BRD-K03842655	6	10um	FDR	HT29	sirolimus	BRD-K89626439	6	10um	FDR	HT29	0.000467727	4.79372
gossypol	BRD-K19295594	6	11.1um	FDR	HEPG2	sirolimus	BRD-K84937637	6	10um	FDR	A549	0.000470394	1.19705
strophanthidin	BRD-K84595254	24	4.9444um	FDR	HEPG2	metformin	BRD-K79602928	6	10um	FDR	HT29	0.000470853	0.608734
mycophenolic-acid	BRD-K63750851	24	2.5um	FDR	HEPG2	sirolimus	BRD-A23770159	6	11.1um	FDR	HEPG2	0.000471925	0.64509
dihydroxyphenylglycine	BRD-A20589515	24	10um	FDR	A549	sirolimus	BRD-A50287119	24.4	10um	FDR	NEU.KCL	0.000473535	Inf
nelfinavir	BRD-K60460488	6	10um	FDR	A549	sirolimus	BRD-A79768653	6	10um	FDR	HT29	0.000474786	1.64959
nelfinavir	BRD-K60460488	6	10um	FDR	A549	sirolimus	BRD-K84937637	6	3.3333um	FDR	A549	0.000474786	1.64959
pterostilbene	BRD-K92870997	24	10um	FDR	NPC	sirolimus	BRD-K84937637	24	10um	FDR	A549	0.000475572	1.33792
brefeldin-a	BRD-A31107743	6	0.09um	FDR	A549	sirolimus	BRD-K84937637	6	10um	FDR	A549	0.000475694	1.85816
troglitazone	BRD-A13084692	6	10um	FDR	HEPG2	sirolimus	BRD-K89626439	24	10um	FDR	NPC	0.000480116	3.36311
4-hydroxy-2-nonenal	BRD-A15914070	24	10um	FDR	A549	sirolimus	BRD-A23770159	6	11.1um	FDR	HEPG2	0.000480311	2.16006
phorbol-myristate-acetate	BRD-K68552125	24	2.5um	FDR	HEPG2	sirolimus	BRD-A79768653	24	10um	FDR	HT29	0.000482169	1.13197
rottlerin	BRD-K03816923	24	9.68um	FDR	A549	sirolimus	BRD-A79768653	24	10um	FDR	A549	0.000483341	1.83226
anisomycin	BRD-K91370081	6	10um	FDR	A549	sirolimus	BRD-K84937637	6	10um	FDR	A549	0.000487432	1.10616
thapsigargin	BRD-K69023402	24	10um	FDR	A549	sirolimus	BRD-K89626439	6	10um	FDR	A549	0.000489134	4.07826
cymarin	BRD-A71459254	6	10um	FDR	HT29	sirolimus	BRD-A79768653	6	10um	FDR	HT29	0.000489722	1.9073
doxorubicin	BRD-A52530684	6	10um	FDR	HT29	sirolimus	BRD-K84937637	6	10um	FDR	A549	0.000491402	1.12862
daunorubicin	BRD-A68009927	24	10um	FDR	A549	sirolimus	BRD-A50287119	24.4	10um	FDR	NEU.KCL	0.000491835	0.867885
brefeldin-a	BRD-A84228258	24	10um	FDR	NPC	sirolimus	BRD-A50287119	24.4	10um	FDR	NEU.KCL	0.000493921	0.855362
narciclasine	BRD-K06792661	6	10um	FDR	A549	sirolimus	BRD-A79768653	6	10um	FDR	HT29	0.0004969	1.57813
hinokitiol	BRD-K37691127	24	10um	FDR	A549	sirolimus	BRD-K84937637	6	0.1235um	FDR	A549	0.00049697	2.70168
resveratrol	BRD-K80738081	6	0.0412um	FDR	A549	sirolimus	BRD-K84937637	6	0.0137um	FDR	A549	0.000500779	1.84709
rosiglitazone	BRD-A97437073	24	80um	FDR	A549	sirolimus	BRD-A23770159	24	11.1um	FDR	A549	0.000500885	0.681628
puromycin	BRD-K36007650	6	10um	FDR	A549	sirolimus	BRD-K84937637	24	10um	FDR	A549	0.000502471	1.01423
brefeldin-a	BRD-A17065207	24	10um	FDR	NPC	sirolimus	BRD-K84937637	24	10um	FDR	NPC	0.000507198	1.27979
lasalocid	BRD-K10207760	24	10um	FDR	NPC	sirolimus	BRD-A79768653	24	10um	FDR	A549	0.000508669	1.98113
theophylline	BRD-K97799481	6	10um	FDR	HT29	sirolimus	BRD-K84937637	6	0.0412um	FDR	A549	0.000509765	1.45455
bafilomycin	BRD-A56798952	24.4	1um	FDR	NEU.KCL	metformin	BRD-K79602928	6	10um	FDR	HT29	0.000510433	0.606387
geldanamycin	BRD-A19500257	24.4	10um	FDR	NEU.KCL	metformin	BRD-K79602928	6	10um	FDR	HT29	0.000513515	0.826387
graveoline	BRD-K92683369	6	10um	FDR	HT29	metformin	BRD-K79602928	6	10um	FDR	HT29	0.000513515	0.826387
strophanthidin	BRD-K84595254	6	10um	FDR	HT29	sirolimus	BRD-A79768653	6	10um	FDR	A549	0.000514116	1.48596
geldanamycin	BRD-A19500257	24	10um	FDR	HT29	sirolimus	BRD-A79768653	6	10um	FDR	HT29	0.000515387	1.94073
geldanamycin	BRD-A19500257	24	10um	FDR	HT29	sirolimus	BRD-A50287119	24.4	10um	FDR	NEU.KCL	0.000516623	0.854419
cytochalasin-b	BRD-K26664453	6	10um	FDR	A549	sirolimus	BRD-A79768653	6	10um	FDR	HT29	0.000517704	2.30043
rosiglitazone	BRD-A97437073	24	80um	FDR	HT29	sirolimus	BRD-A79768653	6	10um	FDR	HT29	0.000517704	2.30043
emetine	BRD-A25687296	6	10um	FDR	HT29	sirolimus	BRD-K84937637	6	1.1111um	FDR	A549	0.000525157	1.44958
menadione	BRD-K78126613	24	10um	FDR	NPC	sirolimus	BRD-A50287119	24.4	10um	FDR	NEU.KCL	0.000530939	1.05553
disulfiram	BRD-K32744045	6	10um	FDR	A549	sirolimus	BRD-K84937637	24	10um	FDR	A549	0.000534613	0.966819
chaetocin	BRD-A85860691	24	0.08um	FDR	A549	sirolimus	BRD-A23770159	24	11.1um	FDR	A549	0.000534726	0.684388
BRD-K59460069	BRD-K59460069	6	10um	FDR	HEPG2	sirolimus	BRD-A79768653	24	10um	FDR	HT29	0.000534854	1.48367
brefeldin-a	BRD-A84228258	24.4	10um	FDR	NEU.KCL	sirolimus	BRD-A79768653	6	10um	FDR	HT29	0.000536268	1.69094
cycloheximide	BRD-A62184259	24	10um	FDR	A549	sirolimus	BRD-A79768653	6	10um	FDR	A549	0.000536605	1.14421
trichostatin-a	BRD-A19037878	6	10um	FDR	HT29	sirolimus	BRD-A79768653	6	10um	FDR	HT29	0.000537726	1.90707
ellipticine	BRD-K85985071	24	10um	FDR	HEPG2	metformin	BRD-K79602928	6	10um	FDR	HT29	0.000541081	0.579846
dihydrocapsaicin	BRD-K45882009	24	10um	FDR	NPC	sirolimus	BRD-A79768653	6	10um	FDR	HT29	0.000543532	1.56621
genistein	BRD-K43797669	6	10um	FDR	HT29	sirolimus	BRD-A79768653	6	10um	FDR	A549	0.000544994	1.68333
emetine	BRD-K03067624	24	10um	FDR	HT29	sirolimus	BRD-K84937637	6	10um	FDR	A549	0.000552227	1.09146
cyclosporin-a	BRD-A69815203	6	10um	FDR	HT29	sirolimus	BRD-A79768653	6	10um	FDR	A549	0.00055294	2.32126
donepezil	BRD-A49160188	24	10um	FDR	A549	sirolimus	BRD-A79768653	6	10um	FDR	A549	0.00055294	2.32126
epinephrine	BRD-A07765530	6	10um	FDR	A549	sirolimus	BRD-A79768653	6	10um	FDR	A549	0.00055294	2.32126
ouabain	BRD-A46747628	24	10um	FDR	A549	sirolimus	BRD-A50287119	6	10um	FDR	NPC	0.000553407	0.769558
delcorine	BRD-A88282067	6	10um	FDR	A549	metformin	BRD-K79602928	6	10um	FDR	HT29	0.000555597	0.729544
chaetocin	BRD-A85860691	6	0.08um	FDR	HT29	sirolimus	BRD-A79768653	6	10um	FDR	HT29	0.00055786	2.04481
plumbagin	BRD-K36137799	6.4	10um	FDR	NEU.KCL	sirolimus	BRD-A50287119	24.4	10um	FDR	NEU.KCL	0.000561009	2.12308
cerulenin	BRD-K52075040	6	44.4um	FDR	A549	sirolimus	BRD-K89626439	6	10um	FDR	A549	0.000561268	4.79165
curcumin	BRD-K07572174	6	0.0015um	FDR	A549	sirolimus	BRD-K84937637	6	0.3704um	FDR	A549	0.000561268	4.79165
rhodomyrtoxin	BRD-K13725475	24	10um	FDR	HT29	sirolimus	BRD-K84937637	6	0.3704um	FDR	A549	0.000561268	4.79165
daunorubicin	BRD-K43389675	6	10um	FDR	HEPG2	metformin	BRD-K79602928	6	10um	FDR	HT29	0.000561539	0.677787
emetine	BRD-A25687296	24	10um	FDR	NPC	sirolimus	BRD-K84937637	24	10um	FDR	A549	0.000566345	0.609955
geldanamycin	BRD-A19500257	24	10um	FDR	HT29	sirolimus	BRD-K84937637	24	10um	FDR	A549	0.000567408	0.592388
tamoxifen	BRD-K93754473	6	10um	FDR	NPC	sirolimus	BRD-A79768653	6	10um	FDR	HT29	0.000570009	1.58284
nelfinavir	BRD-K60460488	6	10um	FDR	A549	sirolimus	BRD-K84937637	6	0.0412um	FDR	A549	0.000570552	1.50711
strophanthidin	BRD-K84595254	6	1.2361um	FDR	HEPG2	sirolimus	BRD-K84937637	24	10um	FDR	A549	0.000570973	0.724509
cyclosporin-a	BRD-A38030642	24	10um	FDR	HT29	sirolimus	BRD-K99369265	6	10um	FDR	A549	0.000573335	1.62113
rottlerin	BRD-K03816923	24	10um	FDR	NPC	sirolimus	BRD-A50287119	24.4	10um	FDR	NEU.KCL	0.000576012	0.949798
piperlongumine	BRD-K24132293	24	10um	FDR	NPC	sirolimus	BRD-A50287119	6	10um	FDR	NPC	0.000576185	0.759087
nelfinavir	BRD-K60460488	6	10um	FDR	HT29	sirolimus	BRD-A79768653	6	10um	FDR	HEPG2	0.000580076	Inf
piceatannol	BRD-K91509126	6	10um	FDR	A549	sirolimus	BRD-A79768653	6	10um	FDR	HEPG2	0.000580076	Inf
rottlerin	BRD-K03816923	6	10um	FDR	HT29	sirolimus	BRD-A79768653	6	10um	FDR	HEPG2	0.000580076	Inf
rottlerin	BRD-K39256324	6	10um	FDR	HT29	sirolimus	BRD-A79768653	6	10um	FDR	HEPG2	0.000580076	Inf
mitomycin-c	BRD-A48237631	24	10um	FDR	A549	sirolimus	BRD-A50287119	24.4	10um	FDR	NEU.KCL	0.000580789	0.827685
hinokitiol	BRD-K37691127	24	10um	FDR	A549	sirolimus	BRD-K99369265	6	10um	FDR	A549	0.000581475	2.6541
hydroxycholesterol	BRD-K35307346	24	10um	FDR	NPC	sirolimus	BRD-K84937637	6	10um	FDR	HEPG2	0.000583194	3.53967
hydrocortisone	BRD-A25143711	24	10um	FDR	A549	sirolimus	BRD-A79768653	6	10um	FDR	A549	0.000584708	1.46679
rottlerin	BRD-K03816923	24	9.68um	FDR	A549	sirolimus	BRD-A79768653	24	10um	FDR	HT29	0.000585277	1.11253
phloretin	BRD-K15563106	24	177.6um	FDR	A549	metformin	BRD-K79602928	6	10um	FDR	HT29	0.000586672	0.586054
mycophenolic-acid	BRD-K31542390	24	2.5um	FDR	HEPG2	sirolimus	BRD-A23770159	6	11.1um	FDR	HEPG2	0.000592306	0.641619
cyclosporin-a	BRD-A64290322	24	10um	FDR	A549	sirolimus	BRD-A79768653	24	10um	FDR	A549	0.00059313	1.86282
emodic-acid	BRD-K94841585	6	10um	FDR	HT29	metformin	BRD-K79602928	6	10um	FDR	HT29	0.000594875	0.831313
staurosporine	BRD-K17953061	24.4	10um	FDR	NEU.KCL	sirolimus	BRD-K84937637	24	10um	FDR	A549	0.000596739	0.580646
tamoxifen	BRD-K93754473	6	10um	FDR	NPC	sirolimus	BRD-A50287119	24	10um	FDR	NPC	0.000596998	1.13963
radicicol	BRD-K33551950	6	10um	FDR	A549	sirolimus	BRD-K84937637	6	10um	FDR	A549	0.000601197	1.07629
ingenol	BRD-A52650764	6	10um	FDR	HEPG2	sirolimus	BRD-A79768653	6	10um	FDR	HEPG2	0.000608545	1.44069
mycophenolic-acid	BRD-K31542390	24	10um	FDR	HEPG2	sirolimus	BRD-A23770159	6	11.1um	FDR	HEPG2	0.000608706	0.63625
phorbol-myristate-acetate	BRD-K68552125	24	2.5um	FDR	HEPG2	sirolimus	BRD-A50287119	24	10um	FDR	NPC	0.000610329	1.07917
narciclasine	BRD-K06792661	24	10um	FDR	HT29	sirolimus	BRD-K84937637	6	10um	FDR	A549	0.000614486	1.15146
rhodomyrtoxin-b	BRD-A08003242	24	10um	FDR	HT29	sirolimus	BRD-K89626439	6	10um	FDR	A549	0.000615547	Inf
staurosporine	BRD-K17953061	24	10um	FDR	A549	sirolimus	BRD-A50287119	24.4	10um	FDR	NEU.KCL	0.000621606	0.940275
pinocembrin	BRD-K94689771	6	10um	FDR	HT29	sirolimus	BRD-A50287119	6.4	10um	FDR	NEU.KCL	0.000629744	1.18946
rhamnetin	BRD-K37206356	6	10um	FDR	HEPG2	sirolimus	BRD-K84937637	6	0.0412um	FDR	A549	0.000630517	Inf
anisomycin	BRD-K82261406	24.4	10um	FDR	NEU.KCL	sirolimus	BRD-A50287119	24	10um	FDR	NPC	0.000631559	1.13242
ouabain	BRD-K35708212	6	10um	FDR	A549	sirolimus	BRD-A79768653	6	10um	FDR	A549	0.000633176	1.32176
prostratin	BRD-K91145395	6	10um	FDR	HEPG2	sirolimus	BRD-A79768653	6	10um	FDR	A549	0.000633176	1.32176
digoxin	BRD-A75144621	6	10um	FDR	A549	sirolimus	BRD-A79768653	6	10um	FDR	A549	0.000642527	1.65404
BRD-A14178283	BRD-A14178283	6	10um	FDR	HEPG2	sirolimus	BRD-A50287119	24.4	10um	FDR	NEU.KCL	0.000643271	0.988478
radicicol	BRD-K33551950	6	10um	FDR	HEPG2	sirolimus	BRD-K84937637	6	10um	FDR	A549	0.000644946	1.65331
brefeldin-a	BRD-A31107743	6	0.09um	FDR	HT29	sirolimus	BRD-K84937637	6	10um	FDR	HT29	0.000653022	4.56954
cyclosporin-a	BRD-K13533483	6	10um	FDR	HT29	sirolimus	BRD-K89626439	6	10um	FDR	HT29	0.000653022	4.56954
oligomycin-c	BRD-K05350981	6	10um	FDR	HT29	sirolimus	BRD-K84937637	6	10um	FDR	HT29	0.000653022	4.56954
oligomycin-c	BRD-K05350981	6	10um	FDR	HT29	sirolimus	BRD-K89626439	6	10um	FDR	HT29	0.000653022	4.56954
lovastatin	BRD-A70155556	24	40um	FDR	HT29	sirolimus	BRD-A23770159	24	11.1um	FDR	HT29	0.000656152	4.99513
trichostatin-a	BRD-K68202742	24	10um	FDR	A549	sirolimus	BRD-K89626439	24	10um	FDR	NPC	0.000657601	2.07815
cyclosporin-a	BRD-A38030642	6	10um	FDR	HT29	sirolimus	BRD-K89626439	6	10um	FDR	HT29	0.000658542	3.44468
rottlerin	BRD-K03816923	24	10um	FDR	NPC	sirolimus	BRD-A79768653	6	10um	FDR	HT29	0.000658953	1.6008
trichostatin-a	BRD-A19037878	6	10um	FDR	HEPG2	sirolimus	BRD-A79768653	6	10um	FDR	HT29	0.000662771	1.71021
penitrem-a	BRD-K03842655	24	10um	FDR	NPC	sirolimus	BRD-A50287119	6	10um	FDR	NPC	0.000664129	1.47904
menadione	BRD-K78126613	6	10um	FDR	A549	sirolimus	BRD-A79768653	6	10um	FDR	HT29	0.000665079	3.27189
paroxetine	BRD-K37991163	6	10um	FDR	HEPG2	sirolimus	BRD-A79768653	6	10um	FDR	HT29	0.000665079	3.27189
aspirin	BRD-K11433652	6	10um	FDR	HT29	sirolimus	BRD-K84937637	6	0.0137um	FDR	A549	0.000671458	1.31822
homoharringtonine	BRD-K76674262	6	10um	FDR	HEPG2	sirolimus	BRD-K84937637	24	10um	FDR	A549	0.000671824	0.616136
hinokitiol	BRD-K37691127	24	10um	FDR	A549	sirolimus	BRD-K84937637	6	1.1111um	FDR	A549	0.000675796	2.60858
taurodeoxycholic-acid	BRD-K33572481	6	10um	FDR	A549	sirolimus	BRD-K84937637	6	0.0412um	FDR	A549	0.000681085	1.401
hinokitiol	BRD-K37691127	6	10um	FDR	A549	sirolimus	BRD-A79768653	6	10um	FDR	HT29	0.000682016	2.23157
oligomycin-a	BRD-A81541225	6	10um	FDR	A549	sirolimus	BRD-K99369265	6	10um	FDR	A549	0.000689976	2.21774
aminolevulinic-acid	BRD-K57631554	6	10um	FDR	A549	sirolimus	BRD-K84937637	6	0.3704um	FDR	A549	0.000690111	3.23658
camptothecin	BRD-K37890730	6	1.1111um	FDR	A549	sirolimus	BRD-A50287119	24.4	10um	FDR	NEU.KCL	0.000697101	0.88796
strophanthidin	BRD-K84595254	6	4.9444um	FDR	HEPG2	sirolimus	BRD-K84937637	24	10um	FDR	A549	0.000699695	0.686852
emetine	BRD-K03067624	24	10um	FDR	A549	sirolimus	BRD-A79768653	6	10um	FDR	A549	0.000701059	1.08182
naringenin	BRD-A94669766	6	10um	FDR	A549	sirolimus	BRD-A50287119	6.4	10um	FDR	NEU.KCL	0.000705044	0.654424
staurosporine	BRD-K17953061	6	10um	FDR	NPC	sirolimus	BRD-A50287119	6	10um	FDR	NPC	0.000711517	0.834887
hydroxycholesterol	BRD-A36707673	24	10um	FDR	NPC	sirolimus	BRD-K84937637	24	10um	FDR	NPC	0.000720568	3.41083
brefeldin-a	BRD-A17065207	6	10um	FDR	HT29	sirolimus	BRD-K84937637	6	10um	FDR	HT29	0.000720586	3.2164
phenethyl-isothiocyanate	BRD-K56700933	6	10um	FDR	HEPG2	sirolimus	BRD-K99369265	6	10um	FDR	A549	0.00072065	1.58485
BRD-A98888159	BRD-A98888159	24	10um	FDR	A549	metformin	BRD-K79602928	6	10um	FDR	HT29	0.000723768	1.97472
homoharringtonine	BRD-K76674262	24	10um	FDR	A549	sirolimus	BRD-K99369265	24	10um	FDR	NPC	0.000724671	2.05078
lovastatin	BRD-A70155556	6	40um	FDR	A549	sirolimus	BRD-A79768653	6	10um	FDR	A549	0.000738703	2.68558
phloretin	BRD-K15563106	24	177.6um	FDR	A549	sirolimus	BRD-K84937637	24	10um	FDR	NPC	0.000739528	1.24249
apicidin	BRD-A63989068	6	10um	FDR	NPC	sirolimus	BRD-A79768653	6	10um	FDR	HT29	0.00074162	1.52369
pidorubicine	BRD-K04548931	24	10um	FDR	A549	sirolimus	BRD-A79768653	6	10um	FDR	HT29	0.000743853	1.51683
reserpine	BRD-K95921201	6	10um	FDR	HT29	sirolimus	BRD-K84937637	6	3.3333um	FDR	A549	0.000746334	1.71755
phorbol-myristate-acetate	BRD-K68552125	24	10um	FDR	HEPG2	sirolimus	BRD-A79768653	24	10um	FDR	HT29	0.00074656	1.07519
tetramethylsilane	BRD-K45988865	6	10um	FDR	HT29	sirolimus	BRD-K84937637	24	10um	FDR	NPC	0.000748184	1.29986
BRD-K59946561	BRD-K59946561	6	10um	FDR	A549	sirolimus	BRD-K84937637	6	0.0137um	FDR	A549	0.000748305	1.62695
trehalose	BRD-K54028654	24.4	10um	FDR	NEU.KCL	sirolimus	BRD-A50287119	6	10um	FDR	NPC	0.000748859	0.842897
pterostilbene	BRD-K92870997	24	10um	FDR	NPC	sirolimus	BRD-A79768653	6	10um	FDR	HEPG2	0.000750006	2.19896
flavokavain-b	BRD-K30296925	6	10um	FDR	HEPG2	sirolimus	BRD-A79768653	24	10um	FDR	HT29	0.000750419	3.55284
rottlerin	BRD-K03816923	6	9.68um	FDR	HT29	sirolimus	BRD-A79768653	24	10um	FDR	HT29	0.000750419	3.55284
glutamine	BRD-K83896451	6	0.0015um	FDR	A549	metformin	BRD-K79602928	6	10um	FDR	HT29	0.000752154	0.902738
cephaeline	BRD-K80348542	24	10um	FDR	NPC	sirolimus	BRD-K84937637	24	10um	FDR	NPC	0.000753597	1.20074
testosterone	BRD-A55393291	24	10um	FDR	NPC	sirolimus	BRD-K84937637	24	10um	FDR	NPC	0.000756198	1.94518
butein	BRD-K17497770	24	10um	FDR	NPC	sirolimus	BRD-A79768653	6	10um	FDR	HT29	0.000757123	1.97962
emetine	BRD-A25687296	24	10um	FDR	A549	sirolimus	BRD-K84937637	6	10um	FDR	A549	0.000759014	1.06686
piperlongumine	BRD-K24132293	6	10um	FDR	HT29	sirolimus	BRD-K84937637	6	0.0046um	FDR	A549	0.000763589	2.01165
tamoxifen	BRD-K93754473	24.4	10um	FDR	NEU.KCL	metformin	BRD-K79602928	6	10um	FDR	HT29	0.000764755	0.72152
geldanamycin	BRD-K11528507	24	10um	FDR	NPC	sirolimus	BRD-A50287119	6	10um	FDR	NPC	0.00076795	0.76559
cycloheximide	BRD-K36055864	6	10um	FDR	HT29	sirolimus	BRD-K84937637	24	10um	FDR	A549	0.000769147	0.870078
rhodomyrtoxin-b	BRD-A08003242	24	10um	FDR	A549	sirolimus	BRD-A79768653	24	10um	FDR	A549	0.000780565	2.56495
disulfiram	BRD-K32744045	6	10um	FDR	A549	sirolimus	BRD-K84937637	6	10um	FDR	A549	0.000791163	1.42253
oligomycin-a	BRD-K74133369	6	10um	FDR	HEPG2	sirolimus	BRD-K84937637	6	10um	FDR	A549	0.000791163	1.42253
HO-013	BRD-K86465814	6	10um	FDR	A549	sirolimus	BRD-K84937637	6	0.0412um	FDR	A549	0.000794118	1.42339
BRD-K59946561	BRD-K59946561	6	10um	FDR	A549	sirolimus	BRD-K84937637	6	0.0412um	FDR	A549	0.000797537	1.94719
mevastatin	BRD-K94441233	6	10um	FDR	A549	sirolimus	BRD-A79768653	6	10um	FDR	A549	0.00080199	1.75476
idarubicin	BRD-A71390734	6	0.08um	FDR	A549	sirolimus	BRD-A23770159	6	11.1um	FDR	A549	0.000804186	1.81351
daunorubicin	BRD-A68009927	6	10um	FDR	A549	metformin	BRD-K79602928	6	10um	FDR	HT29	0.000804903	0.63567
ingenol	BRD-A52650764	24	10um	FDR	HT29	sirolimus	BRD-K89626439	6	10um	FDR	A549	0.000805449	3.89328
rotenone	BRD-K08316444	6	0.63um	FDR	A549	sirolimus	BRD-K84937637	6	0.0412um	FDR	A549	0.000806897	2.5454
cyclosporin-a	BRD-A38030642	24	10um	FDR	A549	sirolimus	BRD-A50287119	24.4	10um	FDR	NEU.KCL	0.000813251	1.17007
BRD-A59728941	BRD-A59728941	24	2.5um	FDR	HEPG2	sirolimus	BRD-K84937637	24	10um	FDR	NPC	0.000813919	2.18048
emetine	BRD-K03067624	6	10um	FDR	HEPG2	sirolimus	BRD-K84937637	6	10um	FDR	HT29	0.000814455	Inf
heliomycin	BRD-K64517075	6	10um	FDR	HT29	sirolimus	BRD-K84937637	6	0.0412um	FDR	A549	0.000814725	1.43109
lasalocid	BRD-A72711497	24	10um	FDR	A549	sirolimus	BRD-A50287119	24	10um	FDR	NPC	0.0008186	2.20421
norepinephrine	BRD-A91555231	6	10um	FDR	HT29	sirolimus	BRD-K84937637	6	0.0137um	FDR	A549	0.0008186	2.20421
rotenone	BRD-K08316444	6	0.63um	FDR	A549	sirolimus	BRD-K84937637	6	0.0137um	FDR	A549	0.0008186	2.20421
C2-dihydroceramide	BRD-K62910157	6.4	10um	FDR	NEU.KCL	sirolimus	BRD-A50287119	24.4	10um	FDR	NEU.KCL	0.000826581	1.21712
idarubicin	BRD-K69650333	6	10um	FDR	A549	sirolimus	BRD-K84937637	6	0.1235um	FDR	A549	0.000826902	1.42569
maackiain	BRD-A95445494	6	10um	FDR	A549	metformin	BRD-K79602928	6	10um	FDR	HT29	0.000839367	0.616965
emetine	BRD-A25687296	24	10um	FDR	NPC	sirolimus	BRD-K99369265	24	10um	FDR	NPC	0.000841162	2.02618
podophyllotoxin	BRD-K47869605	24	10um	FDR	A549	sirolimus	BRD-A79768653	24	10um	FDR	A549	0.0008416	2.01659
sulforaphane	BRD-A58955223	6	10um	FDR	HEPG2	sirolimus	BRD-A23770159	6	11.1um	FDR	HEPG2	0.000842722	1.01929
daunorubicin	BRD-A68009927	24	10um	FDR	A549	sirolimus	BRD-K84937637	6	0.0412um	FDR	A549	0.000846458	1.54858
tamoxifen	BRD-K93754473	6	28.39um	FDR	A549	sirolimus	BRD-K99369265	6	10um	FDR	HEPG2	0.000848699	4.84994
disulfiram	BRD-K32744045	6	10um	FDR	HT29	sirolimus	BRD-A50287119	24.4	10um	FDR	NEU.KCL	0.000849004	1.09268
dehydrocholic-acid	BRD-A64125466	24	10um	FDR	NPC	sirolimus	BRD-K84937637	24	10um	FDR	NPC	0.000849883	1.51618
ouabain	BRD-K35708212	24	10um	FDR	A549	sirolimus	BRD-A50287119	24	10um	FDR	NPC	0.000855228	1.23847
cyclosporin-a	BRD-A38030642	6	10um	FDR	A549	sirolimus	BRD-A50287119	6	10um	FDR	NPC	0.000858476	1.28141
nelfinavir	BRD-K60460488	6	10um	FDR	A549	sirolimus	BRD-A50287119	24.4	10um	FDR	NEU.KCL	0.000860582	0.933088
forskolin	BRD-A70449690	24	10um	FDR	HT29	sirolimus	BRD-A79768653	24	10um	FDR	HT29	0.000862848	2.6077
oligomycin-c	BRD-K05350981	6	10um	FDR	A549	sirolimus	BRD-A50287119	6	10um	FDR	NPC	0.000863457	1.66937
testosterone	BRD-A55393291	24	10um	FDR	NPC	sirolimus	BRD-A50287119	6	10um	FDR	NPC	0.000865453	1.43532
rosiglitazone	BRD-A97437073	6	80um	FDR	A549	sirolimus	BRD-A50287119	6	10um	FDR	NPC	0.000865642	1.83917
oligomycin-a	BRD-K74133369	24	10um	FDR	A549	sirolimus	BRD-A79768653	24	10um	FDR	HT29	0.000867395	1.23958
geldanamycin	BRD-A19500257	6	10um	FDR	NPC	sirolimus	BRD-A50287119	6	10um	FDR	NPC	0.000875597	0.896973
riboflavin	BRD-K92760278	6	10um	FDR	A549	sirolimus	BRD-A50287119	6	10um	FDR	NPC	0.000875597	0.896973
mitomycin-c	BRD-A48237631	6	10um	FDR	HEPG2	sirolimus	BRD-K84937637	24	10um	FDR	NPC	0.000878254	1.37083
thapsigargin	BRD-K69023402	24	10um	FDR	A549	sirolimus	BRD-A79768653	6	10um	FDR	HEPG2	0.000886082	1.92844
thiostrepton	BRD-A20697603	6	10um	FDR	HEPG2	sirolimus	BRD-K84937637	6	10um	FDR	A549	0.00088941	1.40486
spectinomycin	BRD-K11905747	6	10um	FDR	HT29	sirolimus	BRD-A50287119	6	10um	FDR	NPC	0.000892114	0.866765
anisomycin	BRD-K91370081	6	10um	FDR	A549	sirolimus	BRD-A50287119	6	10um	FDR	NPC	0.000893579	0.770458
estradiol	BRD-K18910433	24	10um	FDR	NPC	sirolimus	BRD-A50287119	6	10um	FDR	NPC	0.000896027	Inf
paroxetine	BRD-A62326914	6	10um	FDR	A549	sirolimus	BRD-A50287119	6	10um	FDR	NPC	0.000896027	Inf
phloretin	BRD-K15563106	24	177.6um	FDR	A549	sirolimus	BRD-A79768653	6	10um	FDR	HT29	0.000897674	1.54109
pravastatin	BRD-A11170096	6	10um	FDR	HT29	sirolimus	BRD-K84937637	6	0.0412um	FDR	A549	0.000901444	1.49206
anisomycin	BRD-K82261406	6	10um	FDR	NPC	sirolimus	BRD-A50287119	24.4	10um	FDR	NEU.KCL	0.000902626	0.816425
ellipticine	BRD-K85985071	6	10um	FDR	HT29	sirolimus	BRD-A79768653	6	10um	FDR	HT29	0.000903607	2.50539
lasalocid	BRD-A72711497	24	10um	FDR	A549	sirolimus	BRD-K84937637	6	10um	FDR	A549	0.000910432	2.17781
doxorubicin	BRD-A76941896	24	10um	FDR	HT29	sirolimus	BRD-A79768653	6	10um	FDR	A549	0.000917975	1.02165
emetine	BRD-K03067624	6	10um	FDR	A549	sirolimus	BRD-A79768653	6	10um	FDR	A549	0.000917975	1.02165
acarbose	BRD-K44276885	6	10um	FDR	A549	sirolimus	BRD-A79768653	6	10um	FDR	A549	0.000918659	3.4773
butylparaben	BRD-K08287586	6	10um	FDR	A549	sirolimus	BRD-A79768653	6	10um	FDR	A549	0.000918659	3.4773
rottlerin	BRD-K03816923	6	9.68um	FDR	HT29	sirolimus	BRD-A79768653	6	10um	FDR	A549	0.000918659	3.4773
hinokitiol	BRD-K37691127	6	10um	FDR	HT29	sirolimus	BRD-A50287119	6	10um	FDR	NPC	0.000931395	0.914233
rhodomyrtoxin-b	BRD-A08003242	24	10um	FDR	A549	sirolimus	BRD-A79768653	24	10um	FDR	HT29	0.000933954	1.90434
cerulenin	BRD-K52075040	6	44.4um	FDR	A549	sirolimus	BRD-A79768653	6	10um	FDR	HT29	0.000936941	3.11668
apicidin	BRD-A63989068	24	10um	FDR	NPC	sirolimus	BRD-A79768653	6	10um	FDR	HT29	0.000938549	1.63894
reserpine	BRD-K95921201	6	10um	FDR	HT29	sirolimus	BRD-A79768653	24	10um	FDR	HT29	0.000940794	1.27584
podophyllotoxin	BRD-K47869605	24	10um	FDR	NPC	sirolimus	BRD-A79768653	24	10um	FDR	A549	0.000942393	1.71796
triptolide	BRD-K39484304	6	10um	FDR	HT29	sirolimus	BRD-A50287119	24.4	10um	FDR	NEU.KCL	0.000942591	1.15179
radicicol	BRD-K33551950	6	10um	FDR	HT29	sirolimus	BRD-A79768653	24	10um	FDR	HT29	0.000950228	1.48049
A-23187	BRD-K41431477	6	2.5um	FDR	HEPG2	sirolimus	BRD-A50287119	24.4	10um	FDR	NEU.KCL	0.000951638	0.829466
BRD-K59460069	BRD-K59460069	6	10um	FDR	HEPG2	sirolimus	BRD-A79768653	6	10um	FDR	A549	0.000953168	1.39321
A-23187	BRD-A19134330	6	10um	FDR	NPC	sirolimus	BRD-K84937637	6	0.0412um	FDR	A549	0.000955212	1.4093
brefeldin-a	BRD-A31107743	6	0.09um	FDR	HEPG2	sirolimus	BRD-K84937637	24	10um	FDR	A549	0.000957657	0.676486
piceatannol	BRD-K91509126	6	10um	FDR	NPC	sirolimus	BRD-K84937637	6	10um	FDR	HT29	0.000959851	2.998
paroxetine	BRD-K37991163	24	10um	FDR	NPC	sirolimus	BRD-K84937637	24	10um	FDR	NPC	0.000962376	2.51984
doxorubicin	BRD-A52530684	6	10um	FDR	HT29	sirolimus	BRD-A79768653	6	10um	FDR	A549	0.000962833	1.08955
plumbagin	BRD-K36137799	24	10um	FDR	NPC	metformin	BRD-K79602928	6	10um	FDR	HT29	0.00096337	0.5516
aminolevulinic-acid	BRD-K57631554	6	10um	FDR	A549	sirolimus	BRD-A79768653	24	10um	FDR	HT29	0.000963633	2.15608
thapsigargin	BRD-A62809825	24	10um	FDR	HT29	sirolimus	BRD-A23770159	6	11.1um	FDR	A549	0.000964602	1.62567
emetine	BRD-A25687296	24	10um	FDR	NPC	sirolimus	BRD-K84937637	24	10um	FDR	NPC	0.000968037	1.19691
resveratrol	BRD-K80738081	6	0.0046um	FDR	A549	sirolimus	BRD-K84937637	6	0.0015um	FDR	A549	0.000968852	4.47008
cymarin	BRD-A71459254	24	10um	FDR	A549	metformin	BRD-K79602928	6	10um	FDR	HT29	0.0009748	0.621683
cyclosporin-a	BRD-A38030642	24	10um	FDR	NPC	sirolimus	BRD-A50287119	24	10um	FDR	NPC	0.000977669	1.07162
thapsigargin	BRD-K69023402	24	10um	FDR	A549	sirolimus	BRD-A79768653	24	10um	FDR	HT29	0.000981662	1.57877
brefeldin-a	BRD-A31107743	6	0.09um	FDR	HEPG2	sirolimus	BRD-K89626439	6	10um	FDR	A549	0.000981734	Inf
geldanamycin	BRD-A19500257	6	10um	FDR	HEPG2	sirolimus	BRD-K84937637	6	10um	FDR	HT29	0.000984126	3.137
doxorubicin	BRD-A52530684	6	10um	FDR	HEPG2	sirolimus	BRD-A50287119	24.4	10um	FDR	NEU.KCL	0.00099975	0.881816
chloramphenicol	BRD-A51182606	6	10um	FDR	HT29	sirolimus	BRD-K84937637	6	0.0137um	FDR	A549	0.00100103	1.04055
testosterone	BRD-A55393291	24	10um	FDR	NPC	sirolimus	BRD-A79768653	6	10um	FDR	HEPG2	0.00100247	2.12533
retinyl	BRD-K65331431	6	10um	FDR	A549	sirolimus	BRD-K89626439	24	10um	FDR	A549	0.0010029	1.17887
thapsigargin	BRD-A62809825	24	10um	FDR	HT29	sirolimus	BRD-K84937637	24	10um	FDR	NPC	0.00100352	1.20898
ivermectin	BRD-A48570745	24	10um	FDR	A549	sirolimus	BRD-K84937637	6	10um	FDR	HT29	0.00100626	3.2852
ivermectin	BRD-A48570745	24	10um	FDR	A549	sirolimus	BRD-K89626439	6	10um	FDR	HT29	0.00100626	3.2852
ingenol	BRD-A52650764	24	10um	FDR	HT29	sirolimus	BRD-A79768653	6	10um	FDR	HT29	0.0010082	1.91803
lasalocid	BRD-A72711497	24	10um	FDR	A549	sirolimus	BRD-A79768653	6	10um	FDR	A549	0.00100982	2.15202
rosiglitazone	BRD-A97437073	6	80um	FDR	A549	sirolimus	BRD-A79768653	6	10um	FDR	A549	0.00100982	2.15202
colforsin	BRD-A55416093	24	10um	FDR	A549	sirolimus	BRD-A79768653	6	10um	FDR	HT29	0.00101317	1.76929
deguelin	BRD-K61401890	24	10um	FDR	A549	sirolimus	BRD-K99369265	6	10um	FDR	A549	0.00101358	1.6172
alpha-linolenic-acid	BRD-K33396764	6	10um	FDR	A549	sirolimus	BRD-K84937637	24	10um	FDR	NPC	0.00101754	1.20229
strophanthidin	BRD-K84595254	24	10um	FDR	NPC	sirolimus	BRD-K99369265	24	10um	FDR	NPC	0.00101938	1.91308
rottlerin	BRD-K03816923	24	9.68um	FDR	HT29	sirolimus	BRD-A79768653	24	10um	FDR	A549	0.00102033	1.76766
thapsigargin	BRD-A62809825	6	10um	FDR	HT29	sirolimus	BRD-K84937637	6	10um	FDR	HEPG2	0.00102156	3.37405
parthenolide	BRD-K81651477	24	20um	FDR	HT29	sirolimus	BRD-K84937637	24	10um	FDR	NPC	0.00102323	1.58271
mitomycin-c	BRD-A48237631	6	10um	FDR	HT29	sirolimus	BRD-A50287119	24.4	10um	FDR	NEU.KCL	0.0010238	1.10006
acadesine	BRD-A81585303	6.4	10um	FDR	NEU.KCL	metformin	BRD-K79602928	6.4	10um	FDR	NEU.KCL	0.00102459	Inf
acadesine	BRD-A81585303	6.4	10um	FDR	NEU.KCL	metformin	BRD-K79602928	6	10um	FDR	NPC	0.00102459	Inf
anandamide	BRD-K42352790	6.4	10um	FDR	NEU.KCL	metformin	BRD-K79602928	6.4	10um	FDR	NEU.KCL	0.00102459	Inf
anandamide	BRD-K42352790	6.4	10um	FDR	NEU.KCL	metformin	BRD-K79602928	6	10um	FDR	NPC	0.00102459	Inf
apigenin	BRD-K01493881	6.4	10um	FDR	NEU.KCL	metformin	BRD-K79602928	6.4	10um	FDR	NEU.KCL	0.00102459	Inf
apigenin	BRD-K01493881	6.4	10um	FDR	NEU.KCL	metformin	BRD-K79602928	6	10um	FDR	NPC	0.00102459	Inf
arcyriaflavin-a	BRD-K72726508	6	10um	FDR	A549	metformin	BRD-K79602928	6.4	10um	FDR	NEU.KCL	0.00102459	Inf
arcyriaflavin-a	BRD-K72726508	6	10um	FDR	A549	metformin	BRD-K79602928	6	10um	FDR	NPC	0.00102459	Inf
bafilomycin	BRD-A56798952	6	1um	FDR	NPC	metformin	BRD-K79602928	6.4	10um	FDR	NEU.KCL	0.00102459	Inf
bafilomycin	BRD-A56798952	6	1um	FDR	NPC	metformin	BRD-K79602928	6	10um	FDR	NPC	0.00102459	Inf
betulinic-acid	BRD-K45401373	6	10um	FDR	HEPG2	metformin	BRD-K79602928	6.4	10um	FDR	NEU.KCL	0.00102459	Inf
betulinic-acid	BRD-K45401373	6	10um	FDR	HEPG2	metformin	BRD-K79602928	6	10um	FDR	NPC	0.00102459	Inf
BL-077	BRD-A38878059	6.4	10um	FDR	NEU.KCL	metformin	BRD-K79602928	6.4	10um	FDR	NEU.KCL	0.00102459	Inf
BL-077	BRD-A38878059	6.4	10um	FDR	NEU.KCL	metformin	BRD-K79602928	6	10um	FDR	NPC	0.00102459	Inf
BL-077	BRD-A38878059	6	10um	FDR	NPC	metformin	BRD-K79602928	6.4	10um	FDR	NEU.KCL	0.00102459	Inf
BL-077	BRD-A38878059	6	10um	FDR	NPC	metformin	BRD-K79602928	6	10um	FDR	NPC	0.00102459	Inf
brazilin	BRD-A83326220	6	10um	FDR	A549	metformin	BRD-K79602928	6.4	10um	FDR	NEU.KCL	0.00102459	Inf
brazilin	BRD-A83326220	6	10um	FDR	A549	metformin	BRD-K79602928	6	10um	FDR	NPC	0.00102459	Inf
BRD-K42823101	BRD-K42823101	24.4	10um	FDR	NEU.KCL	metformin	BRD-K79602928	6.4	10um	FDR	NEU.KCL	0.00102459	Inf
BRD-K42823101	BRD-K42823101	24.4	10um	FDR	NEU.KCL	metformin	BRD-K79602928	6	10um	FDR	NPC	0.00102459	Inf
BRD-K63116520	BRD-K63116520	24.4	10um	FDR	NEU.KCL	metformin	BRD-K79602928	6.4	10um	FDR	NEU.KCL	0.00102459	Inf
BRD-K63116520	BRD-K63116520	24.4	10um	FDR	NEU.KCL	metformin	BRD-K79602928	6	10um	FDR	NPC	0.00102459	Inf
BRD-K74773935	BRD-K74773935	24.4	10um	FDR	NEU.KCL	metformin	BRD-K79602928	6.4	10um	FDR	NEU.KCL	0.00102459	Inf
BRD-K74773935	BRD-K74773935	24.4	10um	FDR	NEU.KCL	metformin	BRD-K79602928	6	10um	FDR	NPC	0.00102459	Inf
chenodeoxycholic-acid	BRD-K18135438	6.4	10um	FDR	NEU.KCL	metformin	BRD-K79602928	6.4	10um	FDR	NEU.KCL	0.00102459	Inf
chenodeoxycholic-acid	BRD-K18135438	6.4	10um	FDR	NEU.KCL	metformin	BRD-K79602928	6	10um	FDR	NPC	0.00102459	Inf
cotinine	BRD-K94144010	24	10um	FDR	A549	metformin	BRD-K79602928	6.4	10um	FDR	NEU.KCL	0.00102459	Inf
cotinine	BRD-K94144010	24	10um	FDR	A549	metformin	BRD-K79602928	6	10um	FDR	NPC	0.00102459	Inf
coumestrol	BRD-K97509413	6	10um	FDR	HEPG2	metformin	BRD-K79602928	6.4	10um	FDR	NEU.KCL	0.00102459	Inf
coumestrol	BRD-K97509413	6	10um	FDR	HEPG2	metformin	BRD-K79602928	6	10um	FDR	NPC	0.00102459	Inf
cycloserine	BRD-K87226815	24	10um	FDR	A549	metformin	BRD-K79602928	6.4	10um	FDR	NEU.KCL	0.00102459	Inf
cycloserine	BRD-K87226815	24	10um	FDR	A549	metformin	BRD-K79602928	6	10um	FDR	NPC	0.00102459	Inf
dichloroacetic-acid	BRD-K13664374	24	10um	FDR	A549	metformin	BRD-K79602928	6.4	10um	FDR	NEU.KCL	0.00102459	Inf
dichloroacetic-acid	BRD-K13664374	24	10um	FDR	A549	metformin	BRD-K79602928	6	10um	FDR	NPC	0.00102459	Inf
dicyclohexylurea	BRD-K81521265	6	10um	FDR	A549	metformin	BRD-K79602928	6.4	10um	FDR	NEU.KCL	0.00102459	Inf
dicyclohexylurea	BRD-K81521265	6	10um	FDR	A549	metformin	BRD-K79602928	6	10um	FDR	NPC	0.00102459	Inf
efavirenz	BRD-K40758068	24	10um	FDR	A549	metformin	BRD-K79602928	6.4	10um	FDR	NEU.KCL	0.00102459	Inf
efavirenz	BRD-K40758068	24	10um	FDR	A549	metformin	BRD-K79602928	6	10um	FDR	NPC	0.00102459	Inf
ethinylestradiol	BRD-K48195008	24	10um	FDR	A549	metformin	BRD-K79602928	6.4	10um	FDR	NEU.KCL	0.00102459	Inf
ethinylestradiol	BRD-K48195008	24	10um	FDR	A549	metformin	BRD-K79602928	6	10um	FDR	NPC	0.00102459	Inf
fillalbin	BRD-K28667196	6	10um	FDR	HEPG2	metformin	BRD-K79602928	6.4	10um	FDR	NEU.KCL	0.00102459	Inf
fillalbin	BRD-K28667196	6	10um	FDR	HEPG2	metformin	BRD-K79602928	6	10um	FDR	NPC	0.00102459	Inf
flavanone	BRD-A07824748	6.4	10um	FDR	NEU.KCL	metformin	BRD-K79602928	6.4	10um	FDR	NEU.KCL	0.00102459	Inf
flavanone	BRD-A07824748	6.4	10um	FDR	NEU.KCL	metformin	BRD-K79602928	6	10um	FDR	NPC	0.00102459	Inf
flavanone	BRD-A07824748	6	10um	FDR	NPC	metformin	BRD-K79602928	6.4	10um	FDR	NEU.KCL	0.00102459	Inf
flavanone	BRD-A07824748	6	10um	FDR	NPC	metformin	BRD-K79602928	6	10um	FDR	NPC	0.00102459	Inf
galantamine	BRD-K49481516	24	10um	FDR	A549	metformin	BRD-K79602928	6.4	10um	FDR	NEU.KCL	0.00102459	Inf
galantamine	BRD-K49481516	24	10um	FDR	A549	metformin	BRD-K79602928	6	10um	FDR	NPC	0.00102459	Inf
gingerol	BRD-K26117720	6.4	10um	FDR	NEU.KCL	metformin	BRD-K79602928	6.4	10um	FDR	NEU.KCL	0.00102459	Inf
gingerol	BRD-K26117720	6.4	10um	FDR	NEU.KCL	metformin	BRD-K79602928	6	10um	FDR	NPC	0.00102459	Inf
glycodeoxycholic-acid	BRD-K68144790	6.4	10um	FDR	NEU.KCL	metformin	BRD-K79602928	6.4	10um	FDR	NEU.KCL	0.00102459	Inf
glycodeoxycholic-acid	BRD-K68144790	6.4	10um	FDR	NEU.KCL	metformin	BRD-K79602928	6	10um	FDR	NPC	0.00102459	Inf
glycodeoxycholic-acid	BRD-K68144790	6	10um	FDR	NPC	metformin	BRD-K79602928	6.4	10um	FDR	NEU.KCL	0.00102459	Inf
glycodeoxycholic-acid	BRD-K68144790	6	10um	FDR	NPC	metformin	BRD-K79602928	6	10um	FDR	NPC	0.00102459	Inf
hippeastrine	BRD-K71003802	6	10um	FDR	HEPG2	metformin	BRD-K79602928	6.4	10um	FDR	NEU.KCL	0.00102459	Inf
hippeastrine	BRD-K71003802	6	10um	FDR	HEPG2	metformin	BRD-K79602928	6	10um	FDR	NPC	0.00102459	Inf
hydroquinidine	BRD-A06390036	6	10um	FDR	A549	metformin	BRD-K79602928	6.4	10um	FDR	NEU.KCL	0.00102459	Inf
hydroquinidine	BRD-A06390036	6	10um	FDR	A549	metformin	BRD-K79602928	6	10um	FDR	NPC	0.00102459	Inf
hyperoside	BRD-K84955386	24	10um	FDR	A549	metformin	BRD-K79602928	6.4	10um	FDR	NEU.KCL	0.00102459	Inf
hyperoside	BRD-K84955386	24	10um	FDR	A549	metformin	BRD-K79602928	6	10um	FDR	NPC	0.00102459	Inf
lithocholic-acid	BRD-K20986251	6	10um	FDR	NPC	metformin	BRD-K79602928	6.4	10um	FDR	NEU.KCL	0.00102459	Inf
lithocholic-acid	BRD-K20986251	6	10um	FDR	NPC	metformin	BRD-K79602928	6	10um	FDR	NPC	0.00102459	Inf
lobeline	BRD-K66206289	24	10um	FDR	A549	metformin	BRD-K79602928	6.4	10um	FDR	NEU.KCL	0.00102459	Inf
lobeline	BRD-K66206289	24	10um	FDR	A549	metformin	BRD-K79602928	6	10um	FDR	NPC	0.00102459	Inf
mead-acid	BRD-K96144918	6	10um	FDR	HEPG2	metformin	BRD-K79602928	6.4	10um	FDR	NEU.KCL	0.00102459	Inf
mead-acid	BRD-K96144918	6	10um	FDR	HEPG2	metformin	BRD-K79602928	6	10um	FDR	NPC	0.00102459	Inf
methyltyramine	BRD-K79134921	24.4	10um	FDR	NEU.KCL	metformin	BRD-K79602928	6.4	10um	FDR	NEU.KCL	0.00102459	Inf
methyltyramine	BRD-K79134921	24.4	10um	FDR	NEU.KCL	metformin	BRD-K79602928	6	10um	FDR	NPC	0.00102459	Inf
nevirapine	BRD-K15502390	24	10um	FDR	A549	metformin	BRD-K79602928	6.4	10um	FDR	NEU.KCL	0.00102459	Inf
nevirapine	BRD-K15502390	24	10um	FDR	A549	metformin	BRD-K79602928	6	10um	FDR	NPC	0.00102459	Inf
nicotinamide	BRD-K28912512	6.4	10um	FDR	NEU.KCL	metformin	BRD-K79602928	6.4	10um	FDR	NEU.KCL	0.00102459	Inf
nicotinamide	BRD-K28912512	6.4	10um	FDR	NEU.KCL	metformin	BRD-K79602928	6	10um	FDR	NPC	0.00102459	Inf
norepinephrine	BRD-K39981244	6.4	10um	FDR	NEU.KCL	metformin	BRD-K79602928	6.4	10um	FDR	NEU.KCL	0.00102459	Inf
norepinephrine	BRD-K39981244	6.4	10um	FDR	NEU.KCL	metformin	BRD-K79602928	6	10um	FDR	NPC	0.00102459	Inf
nornicotine	BRD-A24543851	24	10um	FDR	A549	metformin	BRD-K79602928	6.4	10um	FDR	NEU.KCL	0.00102459	Inf
nornicotine	BRD-A24543851	24	10um	FDR	A549	metformin	BRD-K79602928	6	10um	FDR	NPC	0.00102459	Inf
noscapine	BRD-A51393488	6	10um	FDR	HEPG2	metformin	BRD-K79602928	6.4	10um	FDR	NEU.KCL	0.00102459	Inf
noscapine	BRD-A51393488	6	10um	FDR	HEPG2	metformin	BRD-K79602928	6	10um	FDR	NPC	0.00102459	Inf
octopamine	BRD-A14240607	24.4	10um	FDR	NEU.KCL	metformin	BRD-K79602928	6.4	10um	FDR	NEU.KCL	0.00102459	Inf
octopamine	BRD-A14240607	24.4	10um	FDR	NEU.KCL	metformin	BRD-K79602928	6	10um	FDR	NPC	0.00102459	Inf
osthol	BRD-K78294846	6	10um	FDR	HEPG2	metformin	BRD-K79602928	6.4	10um	FDR	NEU.KCL	0.00102459	Inf
osthol	BRD-K78294846	6	10um	FDR	HEPG2	metformin	BRD-K79602928	6	10um	FDR	NPC	0.00102459	Inf
paclitaxel	BRD-A28746609	6	10um	FDR	A549	metformin	BRD-K79602928	6.4	10um	FDR	NEU.KCL	0.00102459	Inf
paclitaxel	BRD-A28746609	6	10um	FDR	A549	metformin	BRD-K79602928	6	10um	FDR	NPC	0.00102459	Inf
phenprobamate	BRD-K22009844	24	10um	FDR	A549	metformin	BRD-K79602928	6.4	10um	FDR	NEU.KCL	0.00102459	Inf
phenprobamate	BRD-K22009844	24	10um	FDR	A549	metformin	BRD-K79602928	6	10um	FDR	NPC	0.00102459	Inf
phenylbutyrate	BRD-K67102207	6	10um	FDR	NPC	metformin	BRD-K79602928	6.4	10um	FDR	NEU.KCL	0.00102459	Inf
phenylbutyrate	BRD-K67102207	6	10um	FDR	NPC	metformin	BRD-K79602928	6	10um	FDR	NPC	0.00102459	Inf
physostigmine	BRD-A37052580	24	10um	FDR	A549	metformin	BRD-K79602928	6.4	10um	FDR	NEU.KCL	0.00102459	Inf
physostigmine	BRD-A37052580	24	10um	FDR	A549	metformin	BRD-K79602928	6	10um	FDR	NPC	0.00102459	Inf
pilocarpine	BRD-K85090592	24	10um	FDR	A549	metformin	BRD-K79602928	6.4	10um	FDR	NEU.KCL	0.00102459	Inf
pilocarpine	BRD-K85090592	24	10um	FDR	A549	metformin	BRD-K79602928	6	10um	FDR	NPC	0.00102459	Inf
PMSF	BRD-K33422401	6	10um	FDR	NPC	metformin	BRD-K79602928	6.4	10um	FDR	NEU.KCL	0.00102459	Inf
PMSF	BRD-K33422401	6	10um	FDR	NPC	metformin	BRD-K79602928	6	10um	FDR	NPC	0.00102459	Inf
progesterone	BRD-K64994968	6.4	10um	FDR	NEU.KCL	metformin	BRD-K79602928	6.4	10um	FDR	NEU.KCL	0.00102459	Inf
progesterone	BRD-K64994968	6.4	10um	FDR	NEU.KCL	metformin	BRD-K79602928	6	10um	FDR	NPC	0.00102459	Inf
prostaglandin-b2	BRD-K82865713	6	10um	FDR	HEPG2	metformin	BRD-K79602928	6.4	10um	FDR	NEU.KCL	0.00102459	Inf
prostaglandin-b2	BRD-K82865713	6	10um	FDR	HEPG2	metformin	BRD-K79602928	6	10um	FDR	NPC	0.00102459	Inf
pseudoephedrine	BRD-K84175871	6	10um	FDR	HEPG2	metformin	BRD-K79602928	6.4	10um	FDR	NEU.KCL	0.00102459	Inf
pseudoephedrine	BRD-K84175871	6	10um	FDR	HEPG2	metformin	BRD-K79602928	6	10um	FDR	NPC	0.00102459	Inf
retinol	BRD-K13927029	6.4	10um	FDR	NEU.KCL	metformin	BRD-K79602928	6.4	10um	FDR	NEU.KCL	0.00102459	Inf
retinol	BRD-K13927029	6.4	10um	FDR	NEU.KCL	metformin	BRD-K79602928	6	10um	FDR	NPC	0.00102459	Inf
rhizocarpic-acid	BRD-A17016119	6	10um	FDR	A549	metformin	BRD-K79602928	6.4	10um	FDR	NEU.KCL	0.00102459	Inf
rhizocarpic-acid	BRD-A17016119	6	10um	FDR	A549	metformin	BRD-K79602928	6	10um	FDR	NPC	0.00102459	Inf
ritonavir	BRD-K51485625	24	10um	FDR	A549	metformin	BRD-K79602928	6.4	10um	FDR	NEU.KCL	0.00102459	Inf
ritonavir	BRD-K51485625	24	10um	FDR	A549	metformin	BRD-K79602928	6	10um	FDR	NPC	0.00102459	Inf
rotenonic-acid	BRD-K34330170	6	10um	FDR	HEPG2	metformin	BRD-K79602928	6.4	10um	FDR	NEU.KCL	0.00102459	Inf
rotenonic-acid	BRD-K34330170	6	10um	FDR	HEPG2	metformin	BRD-K79602928	6	10um	FDR	NPC	0.00102459	Inf
salsolinol	BRD-A26112980	24.4	10um	FDR	NEU.KCL	metformin	BRD-K79602928	6.4	10um	FDR	NEU.KCL	0.00102459	Inf
salsolinol	BRD-A26112980	24.4	10um	FDR	NEU.KCL	metformin	BRD-K79602928	6	10um	FDR	NPC	0.00102459	Inf
simvastatin	BRD-K22134346	24.4	10um	FDR	NEU.KCL	metformin	BRD-K79602928	6.4	10um	FDR	NEU.KCL	0.00102459	Inf
simvastatin	BRD-K22134346	24.4	10um	FDR	NEU.KCL	metformin	BRD-K79602928	6	10um	FDR	NPC	0.00102459	Inf
sulfasalazine	BRD-K10670311	24	10um	FDR	A549	metformin	BRD-K79602928	6.4	10um	FDR	NEU.KCL	0.00102459	Inf
sulfasalazine	BRD-K10670311	24	10um	FDR	A549	metformin	BRD-K79602928	6	10um	FDR	NPC	0.00102459	Inf
telmisartan	BRD-K73999723	6	10um	FDR	HEPG2	metformin	BRD-K79602928	6.4	10um	FDR	NEU.KCL	0.00102459	Inf
telmisartan	BRD-K73999723	6	10um	FDR	HEPG2	metformin	BRD-K79602928	6	10um	FDR	NPC	0.00102459	Inf
umbelliferone	BRD-K87991767	6	10um	FDR	HEPG2	metformin	BRD-K79602928	6.4	10um	FDR	NEU.KCL	0.00102459	Inf
umbelliferone	BRD-K87991767	6	10um	FDR	HEPG2	metformin	BRD-K79602928	6	10um	FDR	NPC	0.00102459	Inf
vanillyl-glycol	BRD-A10396145	24.4	10um	FDR	NEU.KCL	metformin	BRD-K79602928	6.4	10um	FDR	NEU.KCL	0.00102459	Inf
vanillyl-glycol	BRD-A10396145	24.4	10um	FDR	NEU.KCL	metformin	BRD-K79602928	6	10um	FDR	NPC	0.00102459	Inf
vincamine	BRD-K40902647	6	10um	FDR	A549	metformin	BRD-K79602928	6.4	10um	FDR	NEU.KCL	0.00102459	Inf
vincamine	BRD-K40902647	6	10um	FDR	A549	metformin	BRD-K79602928	6	10um	FDR	NPC	0.00102459	Inf
rhodomyrtoxin-b	BRD-A08003242	6	10um	FDR	A549	sirolimus	BRD-A79768653	6	10um	FDR	HT29	0.0010357	1.66042
pidorubicine	BRD-K04548931	6	10um	FDR	HEPG2	sirolimus	BRD-K84937637	6	0.1235um	FDR	A549	0.00103656	1.62027
A-23187	BRD-K41431477	6	10um	FDR	HEPG2	sirolimus	BRD-A79768653	6	10um	FDR	HT29	0.00103666	1.55294
cycloheximide	BRD-A62184259	24	10um	FDR	A549	sirolimus	BRD-K84937637	6	0.3704um	FDR	A549	0.00103848	2.21557
oligomycin-a	BRD-A81541225	6	10um	FDR	A549	sirolimus	BRD-A50287119	6	10um	FDR	NPC	0.00104021	1.50524
lasalocid	BRD-K10207760	24	10um	FDR	A549	sirolimus	BRD-K89626439	24	10um	FDR	NPC	0.0010421	2.52789
trehalose	BRD-K54028654	24.4	10um	FDR	NEU.KCL	sirolimus	BRD-A50287119	6.4	10um	FDR	NEU.KCL	0.00104631	0.724468
hydrocortisone	BRD-A25143711	6	10um	FDR	A549	sirolimus	BRD-A50287119	24.4	10um	FDR	NEU.KCL	0.00104704	2.79516
z-guggulsterone	BRD-K57139258	24.4	10um	FDR	NEU.KCL	sirolimus	BRD-A50287119	24.4	10um	FDR	NEU.KCL	0.00104704	2.79516
thapsigargin	BRD-A62809825	24	10um	FDR	HT29	sirolimus	BRD-A79768653	6	10um	FDR	A549	0.00104969	1.01178
rottlerin	BRD-K03816923	24	10um	FDR	NPC	sirolimus	BRD-A50287119	24	10um	FDR	NPC	0.00105346	1.15659
penitrem-a	BRD-K03842655	24	10um	FDR	A549	sirolimus	BRD-K89626439	24	10um	FDR	A549	0.00106005	1.87658
rottlerin	BRD-K03816923	24	9.68um	FDR	HT29	sirolimus	BRD-K84937637	24	10um	FDR	A549	0.0010612	0.694306
A-23187	BRD-K41431477	24	2.5um	FDR	HEPG2	sirolimus	BRD-A50287119	6	10um	FDR	NPC	0.00106207	0.726146
equilin	BRD-A88080608	6	10um	FDR	A549	sirolimus	BRD-A23770159	6	11.1um	FDR	HEPG2	0.00106571	0.641782
caffeic-acid-phenethyl-ester	BRD-K96188950	6	17.5867um	FDR	HEPG2	sirolimus	BRD-A79768653	24	10um	FDR	HT29	0.001075	1.31264
scoulerine	BRD-K62609077	24	10um	FDR	NPC	metformin	BRD-K79602928	6	10um	FDR	HT29	0.00107785	0.866016
verrucarin-a	BRD-A26002865	6	10um	FDR	A549	sirolimus	BRD-K99369265	6	10um	FDR	A549	0.00108084	1.3561
geldanamycin	BRD-A19500257	24.4	10um	FDR	NEU.KCL	sirolimus	BRD-K84937637	24	10um	FDR	A549	0.0010817	0.796145
oligomycin-a	BRD-A81541225	6	10um	FDR	HT29	sirolimus	BRD-A50287119	6	10um	FDR	NPC	0.00108782	2.96107
disulfiram	BRD-K32744045	6	10um	FDR	HT29	sirolimus	BRD-K89626439	6	10um	FDR	HT29	0.00108782	2.96107
cymarin	BRD-A71459254	6	10um	FDR	HEPG2	sirolimus	BRD-A50287119	24	10um	FDR	NPC	0.00108926	1.14831
camptothecin	BRD-K37890730	6	3.3333um	FDR	A549	sirolimus	BRD-A50287119	24.4	10um	FDR	NEU.KCL	0.00109148	0.944645
hydroxycholesterol	BRD-K35307346	6	10um	FDR	NPC	sirolimus	BRD-A50287119	6	10um	FDR	NPC	0.00109697	1.095
thapsigargin	BRD-K69023402	24.4	10um	FDR	NEU.KCL	sirolimus	BRD-K84937637	6	10um	FDR	A549	0.00109907	1.16455
geldanamycin	BRD-K11528507	6	10um	FDR	NPC	sirolimus	BRD-K89626439	6	10um	FDR	A549	0.00110061	Inf
geldanamycin	BRD-A19500257	6.4	10um	FDR	NEU.KCL	metformin	BRD-K79602928	6	10um	FDR	HT29	0.00110409	0.91989
BRD-A59728941	BRD-A59728941	6	2.5um	FDR	HEPG2	sirolimus	BRD-A79768653	6	10um	FDR	HEPG2	0.00110509	1.53479
oligomycin-a	BRD-K74133369	24	10um	FDR	A549	sirolimus	BRD-K89626439	24	10um	FDR	A549	0.00110683	1.20558
reserpine	BRD-K95921201	6	10um	FDR	HT29	sirolimus	BRD-K84937637	6	0.0046um	FDR	A549	0.00111089	2.03502
rhodomyrtoxin-b	BRD-A08003242	24	10um	FDR	HT29	sirolimus	BRD-K84937637	24	10um	FDR	NPC	0.00111172	1.24921
brefeldin-a	BRD-A17065207	6	10um	FDR	A549	sirolimus	BRD-A50287119	6	10um	FDR	NPC	0.00111455	1.39333
mevastatin	BRD-K94441233	6	10um	FDR	A549	sirolimus	BRD-A50287119	6	10um	FDR	NPC	0.00111455	1.39333
thapsigargin	BRD-K69023402	24	10um	FDR	A549	sirolimus	BRD-K84937637	24	10um	FDR	NPC	0.00112248	1.69016
procyclidine	BRD-A31800922	6	10um	FDR	HT29	metformin	BRD-K79602928	6	10um	FDR	HT29	0.00112639	3.10222
ivermectin	BRD-A48570745	6	10um	FDR	HT29	sirolimus	BRD-K89626439	6	10um	FDR	A549	0.00112877	4.38203
camptothecin	BRD-K37890730	6	0.0015um	FDR	A549	sirolimus	BRD-K84937637	6	0.0412um	FDR	A549	0.0011288	3.067
depudecin	BRD-K07888107	24	10um	FDR	NPC	sirolimus	BRD-K84937637	6	0.0412um	FDR	A549	0.0011288	3.067
fluorouracil	BRD-K24844714	6	0.0046um	FDR	A549	sirolimus	BRD-K84937637	6	0.0015um	FDR	A549	0.00112947	3.01238
cyclosporin-a	BRD-A69815203	24	10um	FDR	A549	sirolimus	BRD-K84937637	6	10um	FDR	HEPG2	0.00113472	4.26632
staurosporine	BRD-K17953061	6	10um	FDR	A549	sirolimus	BRD-K84937637	24	10um	FDR	A549	0.00114057	0.555481
geldanamycin	BRD-A19500257	6	10um	FDR	A549	sirolimus	BRD-A23770159	6	11.1um	FDR	A549	0.00114322	1.5691
staurosporine	BRD-K17953061	24	10um	FDR	A549	sirolimus	BRD-K84937637	6	1.1111um	FDR	A549	0.00114782	1.72814
rotenone	BRD-K08316444	24	10um	FDR	NPC	sirolimus	BRD-A50287119	24	10um	FDR	NPC	0.00115163	1.36688
piceatannol	BRD-K91509126	6	10um	FDR	NPC	sirolimus	BRD-K84937637	6	0.3704um	FDR	A549	0.0011523	2.31288
phloretin	BRD-K15563106	6	177.6um	FDR	A549	sirolimus	BRD-A23770159	6	11.1um	FDR	A549	0.00115475	1.51538
BRD-A59728941	BRD-A59728941	6	10um	FDR	HEPG2	sirolimus	BRD-K84937637	6	10um	FDR	A549	0.00116221	1.03357
cycloheximide	BRD-K36055864	24	10um	FDR	A549	sirolimus	BRD-A79768653	24	10um	FDR	A549	0.00117298	1.74279
ivermectin	BRD-A48570745	24	10um	FDR	A549	sirolimus	BRD-K84937637	6	10um	FDR	A549	0.00117852	1.67673
thapsigargin	BRD-K69023402	24	10um	FDR	A549	sirolimus	BRD-K84937637	6	10um	FDR	HEPG2	0.00117861	3.38403
asiatic-acid	BRD-A72758037	24	10um	FDR	NPC	sirolimus	BRD-K84937637	24	10um	FDR	NPC	0.00117907	Inf
bongkrek-acid	BRD-A41301928	24	10um	FDR	NPC	sirolimus	BRD-K84937637	24	10um	FDR	NPC	0.00117907	Inf
estriol	BRD-K17016787	24	10um	FDR	NPC	sirolimus	BRD-K84937637	24	10um	FDR	NPC	0.00117907	Inf
evoxine	BRD-K47693913	24	10um	FDR	NPC	sirolimus	BRD-K84937637	24	10um	FDR	NPC	0.00117907	Inf
phenolphthalein	BRD-K19227686	24	10um	FDR	NPC	sirolimus	BRD-K84937637	24	10um	FDR	NPC	0.00117907	Inf
retinol	BRD-K13927029	24	10um	FDR	NPC	sirolimus	BRD-K84937637	24	10um	FDR	NPC	0.00117907	Inf
ropinirole	BRD-K15933101	24	10um	FDR	NPC	sirolimus	BRD-K84937637	24	10um	FDR	NPC	0.00117907	Inf
tacrolimus	BRD-K69608737	24	10um	FDR	NPC	sirolimus	BRD-K84937637	24	10um	FDR	NPC	0.00117907	Inf
oligomycin-a	BRD-K74133369	24	10um	FDR	A549	sirolimus	BRD-K84937637	24	10um	FDR	NPC	0.00119085	1.32759
BRD-A59728941	BRD-A59728941	6	2.5um	FDR	HEPG2	sirolimus	BRD-A50287119	24	10um	FDR	NPC	0.00120354	1.19481
latrunculin-b	BRD-A19248578	24	10um	FDR	A549	sirolimus	BRD-A50287119	24	10um	FDR	NPC	0.00120354	1.19481
1-monopalmitin	BRD-A80928489	24	10um	FDR	A549	sirolimus	BRD-K84937637	6	0.0015um	FDR	A549	0.00120358	2.46675
anisomycin	BRD-K91370081	6	10um	FDR	HT29	sirolimus	BRD-K84937637	6	10um	FDR	A549	0.00121853	1.0238
oligomycin-a	BRD-K74133369	24	10um	FDR	A549	sirolimus	BRD-K84937637	24	10um	FDR	A549	0.00123659	0.743739
digoxin	BRD-K23478508	24	10um	FDR	NPC	sirolimus	BRD-K84937637	24	10um	FDR	NPC	0.00125186	1.24336
capsaicin	BRD-K50590187	24	10um	FDR	NPC	sirolimus	BRD-A79768653	24	10um	FDR	HT29	0.0012529	2.47308
celastrol	BRD-A80960055	6	10um	FDR	HT29	sirolimus	BRD-A79768653	24	10um	FDR	HT29	0.0012529	2.47308
capsaicin	BRD-K50590187	6	10um	FDR	NPC	sirolimus	BRD-A50287119	6	10um	FDR	NPC	0.0012624	1.75101
deguelin	BRD-K61401890	24	10um	FDR	A549	sirolimus	BRD-A79768653	6	10um	FDR	HT29	0.0012635	1.72665
gossypol	BRD-K19295594	6	11.1um	FDR	A549	sirolimus	BRD-A79768653	6	10um	FDR	HT29	0.0012635	1.72665
phloretin	BRD-K15563106	6	177.6um	FDR	HT29	sirolimus	BRD-A79768653	6	10um	FDR	HT29	0.00127044	2.9821
rottlerin	BRD-K03816923	6	10um	FDR	HEPG2	sirolimus	BRD-A79768653	6	10um	FDR	HT29	0.00127044	2.9821
resveratrol	BRD-K25591257	6	10um	FDR	A549	sirolimus	BRD-A79768653	6	10um	FDR	HT29	0.00127597	2.3979
reserpine	BRD-K95921201	6	10um	FDR	HT29	sirolimus	BRD-A50287119	6	10um	FDR	NPC	0.00127737	0.941512
cyclosporin-a	BRD-A38030642	24	10um	FDR	HT29	sirolimus	BRD-K84937637	24	10um	FDR	A549	0.00128598	0.794423
mycophenolic-acid	BRD-K31542390	24	10um	FDR	A549	sirolimus	BRD-A79768653	24	10um	FDR	A549	0.00128618	1.80375
mycophenolic-acid	BRD-K31542390	24	10um	FDR	A549	sirolimus	BRD-K84937637	6	10um	FDR	A549	0.00128682	1.1835
brefeldin-a	BRD-A17065207	24	10um	FDR	A549	sirolimus	BRD-K84937637	24	10um	FDR	A549	0.00128722	0.598129
ochratoxin-a	BRD-K39944607	24	10um	FDR	A549	sirolimus	BRD-A50287119	24.4	10um	FDR	NEU.KCL	0.00128957	1.27513
cyclosporin-a	BRD-A64290322	6	10um	FDR	A549	sirolimus	BRD-K89626439	24	10um	FDR	A549	0.00129161	1.83102
brefeldin-a	BRD-A17065207	24	10um	FDR	A549	sirolimus	BRD-A79768653	24	10um	FDR	A549	0.00130563	1.66579
cyclosporin-a	BRD-K13533483	6	10um	FDR	HEPG2	sirolimus	BRD-A79768653	6	10um	FDR	HT29	0.00130687	4.60937
cyclosporin-a	BRD-A69815203	6	10um	FDR	HEPG2	sirolimus	BRD-A23770159	6	11.1um	FDR	A549	0.00130687	4.60937
estradiol	BRD-K18910433	24	10um	FDR	NPC	sirolimus	BRD-A79768653	6	10um	FDR	HT29	0.00130687	4.60937
paroxetine	BRD-A62326914	6	10um	FDR	A549	sirolimus	BRD-A79768653	6	10um	FDR	HT29	0.00130687	4.60937
progesterone	BRD-K64994968	6	10um	FDR	NPC	sirolimus	BRD-A79768653	6	10um	FDR	HT29	0.00130687	4.60937
rescinnamine	BRD-K52930707	6	10um	FDR	HEPG2	sirolimus	BRD-A79768653	6	10um	FDR	HT29	0.00130687	4.60937
simvastatin	BRD-K22134346	6	10um	FDR	NPC	sirolimus	BRD-A79768653	6	10um	FDR	HT29	0.00130687	4.60937
tamoxifen	BRD-K93754473	6	10um	FDR	HEPG2	sirolimus	BRD-A79768653	6	10um	FDR	HT29	0.00130687	4.60937
tamoxifen	BRD-K93754473	6	28.39um	FDR	HT29	sirolimus	BRD-A79768653	6	10um	FDR	HT29	0.00130687	4.60937
cycloheximide	BRD-K36055864	24.4	10um	FDR	NEU.KCL	sirolimus	BRD-A50287119	6.4	10um	FDR	NEU.KCL	0.00131334	0.878838
thapsigargin	BRD-K69023402	24.4	10um	FDR	NEU.KCL	sirolimus	BRD-K84937637	6	10um	FDR	HEPG2	0.00131422	3.2985
doxorubicin	BRD-K92093830	6	10um	FDR	HT29	sirolimus	BRD-K84937637	6	0.3704um	FDR	A549	0.00132088	2.17209
camptothecin	BRD-K37890730	6	0.3704um	FDR	A549	sirolimus	BRD-A79768653	24	10um	FDR	A549	0.00132751	1.67714
heliomycin	BRD-K64517075	6	10um	FDR	HT29	sirolimus	BRD-K84937637	24	10um	FDR	NPC	0.00132793	1.14683
ursolic-acid	BRD-K68185022	6	70.07um	FDR	A549	sirolimus	BRD-K84937637	6	10um	FDR	HT29	0.00132803	2.90188
ingenol	BRD-A52650764	24	10um	FDR	HT29	sirolimus	BRD-A50287119	24.4	10um	FDR	NEU.KCL	0.00132895	1.20796
C2-dihydroceramide	BRD-K62910157	24.4	10um	FDR	NEU.KCL	sirolimus	BRD-A50287119	6.4	10um	FDR	NEU.KCL	0.00133416	0.695169
trichostatin-a	BRD-A19037878	24	10um	FDR	HEPG2	sirolimus	BRD-A79768653	6	10um	FDR	A549	0.00133721	1.05866
brefeldin-a	BRD-A84228258	6	10um	FDR	NPC	sirolimus	BRD-A79768653	6	10um	FDR	A549	0.00134103	1.34097
rottlerin	BRD-K03816923	24	10um	FDR	NPC	sirolimus	BRD-K84937637	24	10um	FDR	NPC	0.00134395	1.22455
bufalin	BRD-K63606607	6	10um	FDR	A549	sirolimus	BRD-K84937637	24	10um	FDR	A549	0.0013447	1.05995
thapsigargin	BRD-K69023402	24	10um	FDR	A549	sirolimus	BRD-K84937637	6	10um	FDR	A549	0.00134753	1.52095
camptothecin	BRD-K37890730	6	0.0412um	FDR	A549	sirolimus	BRD-K84937637	6	10um	FDR	A549	0.00134804	1.42106
radicicol	BRD-K33551950	6	10um	FDR	HT29	sirolimus	BRD-K84937637	6	10um	FDR	A549	0.00134804	1.42106
antimycin-a	BRD-A52886023	6	10um	FDR	A549	sirolimus	BRD-A23770159	6	11.1um	FDR	HEPG2	0.00134984	0.693291
ivermectin	BRD-A48570745	24	10um	FDR	A549	sirolimus	BRD-A79768653	6	10um	FDR	A549	0.00135055	1.64964
flavokavain-b	BRD-K30296925	24	10um	FDR	NPC	sirolimus	BRD-K89626439	24	10um	FDR	NPC	0.00135885	4.15992
trichostatin-a	BRD-A19037878	6.4	10um	FDR	NEU.KCL	sirolimus	BRD-K89626439	24	10um	FDR	NPC	0.00135885	4.15992
aminolevulinic-acid	BRD-K57631554	6	10um	FDR	A549	sirolimus	BRD-K84937637	6	1.1111um	FDR	A549	0.00135901	2.38223
doxorubicin	BRD-A52530684	6	10um	FDR	HEPG2	sirolimus	BRD-K84937637	6	0.0046um	FDR	A549	0.0013605	1.8602
betulinic-acid	BRD-K45401373	24	10um	FDR	A549	sirolimus	BRD-K84937637	24	10um	FDR	A549	0.00136227	0.710086
phorbol-myristate-acetate	BRD-K68552125	24	10um	FDR	HEPG2	sirolimus	BRD-A23770159	6	11.1um	FDR	HEPG2	0.00137429	0.603187
lovastatin	BRD-A70155556	24	40um	FDR	A549	sirolimus	BRD-A50287119	24	10um	FDR	NPC	0.00137869	1.03581
caffeic-acid-phenethyl-ester	BRD-K96188950	6	4.3967um	FDR	HEPG2	sirolimus	BRD-K84937637	6	10um	FDR	HT29	0.00138784	4.09643
hinokitiol	BRD-K37691127	6	10um	FDR	HEPG2	sirolimus	BRD-K84937637	6	0.3704um	FDR	A549	0.00138784	4.09643
retinol	BRD-K13927029	6	10um	FDR	HEPG2	sirolimus	BRD-K84937637	6	0.3704um	FDR	A549	0.00138784	4.09643
geldanamycin	BRD-K11528507	6	10um	FDR	NPC	sirolimus	BRD-K84937637	6	10um	FDR	A549	0.0014021	1.0585
caffeic-acid-phenethyl-ester	BRD-K96188950	6	4.3967um	FDR	HEPG2	sirolimus	BRD-A79768653	6	10um	FDR	HEPG2	0.00140269	2.95936
cerulenin	BRD-K52075040	6	44.4um	FDR	A549	sirolimus	BRD-A79768653	6	10um	FDR	HEPG2	0.00140269	2.95936
ivermectin	BRD-A48570745	24	10um	FDR	A549	sirolimus	BRD-K84937637	24	10um	FDR	NPC	0.0014029	1.80726
rhodomyrtoxin-b	BRD-A08003242	24	10um	FDR	HT29	sirolimus	BRD-A79768653	24	10um	FDR	A549	0.00140524	1.7103
hydroxycholesterol	BRD-K35307346	24	10um	FDR	NPC	sirolimus	BRD-A50287119	24	10um	FDR	NPC	0.00140901	1.21878
daunorubicin	BRD-K43389675	6	10um	FDR	HT29	sirolimus	BRD-K84937637	6	0.0046um	FDR	A549	0.00140911	1.8537
hydrocortisone	BRD-A25143711	24	10um	FDR	A549	sirolimus	BRD-K84937637	24	10um	FDR	A549	0.00140959	0.913656
homoharringtonine	BRD-K76674262	6	10um	FDR	A549	sirolimus	BRD-K84937637	6	10um	FDR	A549	0.00140989	1.01957
totaralolal	BRD-A52805806	6	10um	FDR	HEPG2	sirolimus	BRD-K84937637	24	10um	FDR	A549	0.00141212	1.10605
idarubicin	BRD-K69650333	24	10um	FDR	A549	sirolimus	BRD-A79768653	6	10um	FDR	HT29	0.00141696	1.53371
emetine	BRD-K03067624	24	10um	FDR	HEPG2	sirolimus	BRD-A79768653	6	10um	FDR	A549	0.00141778	1.02625
caffeic-acid	BRD-K09900591	6	10um	FDR	HT29	metformin	BRD-K79602928	6	10um	FDR	HT29	0.00141965	1.79112
doxorubicin	BRD-K92093830	6	10um	FDR	A549	sirolimus	BRD-A79768653	24	10um	FDR	HT29	0.00142055	1.17623
oligomycin-a	BRD-A81541225	6	10um	FDR	HEPG2	sirolimus	BRD-A79768653	6	10um	FDR	A549	0.00142825	1.05231
latrunculin-b	BRD-A19248578	24	10um	FDR	A549	sirolimus	BRD-A79768653	24	10um	FDR	A549	0.00142863	1.78321
lasalocid	BRD-K10207760	24	10um	FDR	A549	sirolimus	BRD-A79768653	24	10um	FDR	HT29	0.00142875	1.63731
cyclosporin-a	BRD-A38030642	24	10um	FDR	NPC	sirolimus	BRD-A79768653	6	10um	FDR	HT29	0.001441	1.43006
epigallocatechin	BRD-K19216856	24	88.8um	FDR	HT29	sirolimus	BRD-A79768653	24	10um	FDR	HT29	0.00145469	3.14631
isoliquiritigenin	BRD-K33583600	6	10um	FDR	HT29	sirolimus	BRD-A79768653	24	10um	FDR	HT29	0.00145469	3.14631
licochalcone-a	BRD-K99667445	24	10um	FDR	NPC	sirolimus	BRD-A79768653	24	10um	FDR	HT29	0.00145469	3.14631
retinol	BRD-K13927029	6	10um	FDR	HEPG2	sirolimus	BRD-A79768653	24	10um	FDR	HT29	0.00145469	3.14631
ellipticine	BRD-K85985071	24	2.5um	FDR	HEPG2	sirolimus	BRD-K84937637	6	0.3704um	FDR	A549	0.00145707	2.14658
rottlerin	BRD-K03816923	24	10um	FDR	A549	sirolimus	BRD-K89626439	24	10um	FDR	A549	0.00145727	1.26695
daunorubicin	BRD-A68009927	6	10um	FDR	A549	sirolimus	BRD-K84937637	6	0.0046um	FDR	A549	0.00145914	1.84724
cyclosporin-a	BRD-A38030642	24	10um	FDR	A549	sirolimus	BRD-K89626439	6	10um	FDR	A549	0.00146218	3.67023
gossypol	BRD-K19295594	6	11.1um	FDR	HEPG2	sirolimus	BRD-A79768653	6	10um	FDR	HEPG2	0.00146636	1.42978
scoulerine	BRD-K62609077	24	10um	FDR	NPC	sirolimus	BRD-K84937637	24	10um	FDR	NPC	0.00147942	1.4259
epitestosterone	BRD-A53131506	24	10um	FDR	A549	metformin	BRD-K79602928	6	10um	FDR	HT29	0.00148198	1.18855
bufalin	BRD-K63606607	24	10um	FDR	A549	sirolimus	BRD-K84937637	24	10um	FDR	NPC	0.00148224	1.29609
cycloheximide	BRD-K36055864	24	10um	FDR	NPC	sirolimus	BRD-K84937637	24	10um	FDR	NPC	0.00148224	1.29609
papaverine	BRD-K15567136	6	10um	FDR	A549	sirolimus	BRD-A79768653	24	10um	FDR	A549	0.00148438	4.22579
emetine	BRD-A25687296	6	10um	FDR	HT29	sirolimus	BRD-K84937637	6	10um	FDR	A549	0.00148716	1.08737
pidorubicine	BRD-K04548931	6	10um	FDR	HT29	sirolimus	BRD-A79768653	6	10um	FDR	A549	0.00149104	0.991339
camptothecin	BRD-K37890730	6	3.3333um	FDR	A549	sirolimus	BRD-A79768653	6	10um	FDR	HT29	0.00149324	1.525
ouabain	BRD-A68930007	6	10um	FDR	HT29	sirolimus	BRD-A79768653	6	10um	FDR	A549	0.00149606	1.32407
progesterone	BRD-K64994968	24	10um	FDR	NPC	sirolimus	BRD-A79768653	6	10um	FDR	HT29	0.00149766	2.34804
piceatannol	BRD-K91509126	24	10um	FDR	NPC	sirolimus	BRD-A79768653	6	10um	FDR	HEPG2	0.00150418	1.37438
staurosporine	BRD-K17953061	6	10um	FDR	A549	sirolimus	BRD-A23770159	6	11.1um	FDR	HEPG2	0.00150571	0.595534
cycloheximide	BRD-A62184259	24	10um	FDR	A549	sirolimus	BRD-K84937637	6	0.0046um	FDR	A549	0.00151063	1.84079
hydrocortisone	BRD-A25143711	24	10um	FDR	A549	sirolimus	BRD-A79768653	24	10um	FDR	HT29	0.00151853	1.40318
latrunculin-b	BRD-A19248578	24	10um	FDR	A549	sirolimus	BRD-K84937637	6	10um	FDR	A549	0.00151999	1.16185
phorbol-myristate-acetate	BRD-K68552125	24	10um	FDR	HEPG2	sirolimus	BRD-A50287119	24	10um	FDR	NPC	0.00152322	1.01954
cyclosporin-a	BRD-A38030642	6	10um	FDR	HEPG2	sirolimus	BRD-K84937637	6	10um	FDR	A549	0.00153658	2.03252
scopolamine	BRD-K89923877	6	10um	FDR	HT29	sirolimus	BRD-K84937637	24	10um	FDR	NPC	0.00153826	1.34798
trichostatin-a	BRD-K68202742	24	10um	FDR	NPC	sirolimus	BRD-A79768653	6	10um	FDR	HT29	0.00154243	1.61274
cycloheximide	BRD-K36055864	6.4	10um	FDR	NEU.KCL	sirolimus	BRD-K84937637	6	10um	FDR	A549	0.00154299	1.4963
trehalose	BRD-K54028654	24.4	10um	FDR	NEU.KCL	metformin	BRD-K79602928	6	10um	FDR	HT29	0.00154345	0.623565
podophyllotoxin	BRD-K47869605	24	10um	FDR	NPC	sirolimus	BRD-K84937637	24	10um	FDR	A549	0.00155538	0.597692
gossypol	BRD-K19295594	6	11.1um	FDR	HEPG2	sirolimus	BRD-A50287119	24.4	10um	FDR	NEU.KCL	0.00156346	0.888507
parthenolide	BRD-K81651477	24	20um	FDR	HT29	sirolimus	BRD-A79768653	6	10um	FDR	HT29	0.00156584	1.82232
deoxycholic-acid	BRD-K41170226	6	10um	FDR	A549	sirolimus	BRD-K84937637	6	0.0412um	FDR	A549	0.00157127	1.34961
cerulenin	BRD-K52075040	6	44.4um	FDR	HT29	sirolimus	BRD-A79768653	24	10um	FDR	HT29	0.00157839	2.02037
dehydrocholic-acid	BRD-A64125466	24	10um	FDR	NPC	sirolimus	BRD-K84937637	6	0.0137um	FDR	A549	0.00157923	1.31829
emetine	BRD-K03067624	6	10um	FDR	A549	sirolimus	BRD-K84937637	6	10um	FDR	A549	0.00158127	0.977251
staurosporine	BRD-K17953061	6	10um	FDR	A549	sirolimus	BRD-A50287119	24.4	10um	FDR	NEU.KCL	0.00158297	0.756601
BRD-K59460069	BRD-K59460069	6	10um	FDR	HEPG2	sirolimus	BRD-K99369265	6	10um	FDR	A549	0.00158395	1.64618
disulfiram	BRD-K32744045	6	10um	FDR	A549	sirolimus	BRD-K99369265	6	10um	FDR	A549	0.00158395	1.64618
triptolide	BRD-K39484304	6	10um	FDR	HT29	sirolimus	BRD-K84937637	6	0.1235um	FDR	A549	0.00158464	1.65147
prostratin	BRD-K91145395	24	10um	FDR	A549	sirolimus	BRD-K84937637	24	10um	FDR	NPC	0.00159168	1.28575
radicicol	BRD-K33551950	6	10um	FDR	HT29	sirolimus	BRD-A79768653	6	10um	FDR	A549	0.00159236	1.39252
BRD-K85853281	BRD-K85853281	6	10um	FDR	HT29	sirolimus	BRD-K84937637	6	0.0046um	FDR	A549	0.00160105	2.38128
capsaicin	BRD-K50590187	6	160um	FDR	A549	sirolimus	BRD-K84937637	6	10um	FDR	HEPG2	0.0016026	4.06357
curcumin	BRD-K07572174	6	0.0412um	FDR	A549	sirolimus	BRD-K84937637	6	0.0015um	FDR	A549	0.0016026	4.06357
troglitazone	BRD-A13084692	24	10um	FDR	HT29	sirolimus	BRD-K84937637	6	10um	FDR	HEPG2	0.0016026	4.06357
ouabain	BRD-K35708212	24	10um	FDR	NPC	sirolimus	BRD-K84937637	24	10um	FDR	NPC	0.00160505	1.16385
17-beta-estradiol	BRD-K66766661	6	10um	FDR	HT29	sirolimus	BRD-K84937637	6	0.0412um	FDR	A549	0.00161388	1.54189
thapsigargin	BRD-K69023402	6.4	10um	FDR	NEU.KCL	sirolimus	BRD-A50287119	6.4	10um	FDR	NEU.KCL	0.00162004	2.41032
cyclosporin-a	BRD-A38030642	24	10um	FDR	NPC	sirolimus	BRD-A50287119	6	10um	FDR	NPC	0.00162465	0.737311
emetine	BRD-A25687296	6	10um	FDR	HEPG2	sirolimus	BRD-K84937637	24	10um	FDR	A549	0.0016352	0.724533
geldanamycin	BRD-A19500257	6	10um	FDR	A549	sirolimus	BRD-K99369265	6	10um	FDR	A549	0.00164111	1.38971
yohimbine	BRD-A51410489	6	10um	FDR	HT29	metformin	BRD-K79602928	6	10um	FDR	HT29	0.001646	0.632586
trichostatin-a	BRD-K68202742	6	10um	FDR	NPC	sirolimus	BRD-A50287119	24.4	10um	FDR	NEU.KCL	0.00164685	0.774448
disulfiram	BRD-K32744045	6	10um	FDR	HT29	sirolimus	BRD-K84937637	24	10um	FDR	A549	0.00164881	0.802137
evodiamine	BRD-A68631409	24	10um	FDR	HT29	sirolimus	BRD-A79768653	24	10um	FDR	HT29	0.00165924	1.14405
cycloheximide	BRD-K36055864	24	2.5um	FDR	HEPG2	sirolimus	BRD-A79768653	6	10um	FDR	HT29	0.00166109	1.43539
cycloheximide	BRD-A62184259	6	10um	FDR	HT29	sirolimus	BRD-K99369265	6	10um	FDR	A549	0.00166201	1.30615
cyclosporin-a	BRD-A64290322	24	10um	FDR	A549	sirolimus	BRD-K84937637	6	10um	FDR	HEPG2	0.00166415	3.22696
geldanamycin	BRD-A19500257	6	10um	FDR	NPC	sirolimus	BRD-K84937637	6	10um	FDR	HEPG2	0.00166415	3.22696
withaferin-a	BRD-A52193669	6	10um	FDR	HT29	sirolimus	BRD-K89626439	6	10um	FDR	HT29	0.00166451	2.83437
penitrem-a	BRD-K03842655	6	10um	FDR	HT29	sirolimus	BRD-K84937637	6	10um	FDR	A549	0.0016647	3.09536
narciclasine	BRD-K06792661	6	10um	FDR	HT29	sirolimus	BRD-K84937637	6	10um	FDR	A549	0.00166507	0.991367
gossypol	BRD-K19295594	24	11.1um	FDR	A549	sirolimus	BRD-A50287119	24	10um	FDR	NPC	0.00166581	1.00161
doxorubicin	BRD-A52530684	6	10um	FDR	HEPG2	sirolimus	BRD-K84937637	6	0.1235um	FDR	A549	0.00166599	1.32077
capsaicin	BRD-K50590187	24	160um	FDR	HT29	sirolimus	BRD-A79768653	6	10um	FDR	HT29	0.00167044	2.86326
celastrol	BRD-A80960055	6	10um	FDR	HT29	sirolimus	BRD-A79768653	6	10um	FDR	HT29	0.00167044	2.86326
rotenone	BRD-K08316444	24	0.1563um	FDR	HEPG2	sirolimus	BRD-A79768653	6	10um	FDR	HEPG2	0.00168886	1.35963
brefeldin-a	BRD-A17065207	6	10um	FDR	A549	sirolimus	BRD-K99369265	6	10um	FDR	A549	0.00168959	1.98809
trichostatin-a	BRD-K68202742	6	10um	FDR	HT29	sirolimus	BRD-A79768653	6	10um	FDR	A549	0.00169196	1.13659
brefeldin-a	BRD-A84228258	24.4	10um	FDR	NEU.KCL	sirolimus	BRD-A79768653	6	10um	FDR	HEPG2	0.00169705	1.46421
cyclosporin-a	BRD-A38030642	6	10um	FDR	HEPG2	sirolimus	BRD-A79768653	6	10um	FDR	A549	0.00170135	2.00674
geldanamycin	BRD-A19500257	24	10um	FDR	A549	sirolimus	BRD-A50287119	24	10um	FDR	NPC	0.00170493	1.01673
daunorubicin	BRD-A68009927	24	10um	FDR	A549	sirolimus	BRD-K89626439	24	10um	FDR	A549	0.00170843	1.04114
daunorubicin	BRD-A68009927	6	10um	FDR	HEPG2	metformin	BRD-K79602928	6	10um	FDR	HT29	0.00170993	0.712879
geldanamycin	BRD-A19500257	6	10um	FDR	A549	sirolimus	BRD-K84937637	6	10um	FDR	HEPG2	0.00171224	3.21828
tacrolimus	BRD-K69608737	6	10um	FDR	HT29	sirolimus	BRD-A79768653	6	10um	FDR	HEPG2	0.00171402	4.45962
doconexent	BRD-K39965020	6	10um	FDR	NPC	metformin	BRD-K79602928	6	10um	FDR	HT29	0.00171465	0.89487
radicicol	BRD-K33551950	6	10um	FDR	HEPG2	sirolimus	BRD-A50287119	24.4	10um	FDR	NEU.KCL	0.0017147	1.30412
rotenone	BRD-K08316444	6	0.63um	FDR	A549	sirolimus	BRD-A50287119	24.4	10um	FDR	NEU.KCL	0.00171533	1.83202
latrunculin-b	BRD-A19248578	24	10um	FDR	A549	sirolimus	BRD-K99369265	6	10um	FDR	HEPG2	0.00172788	Inf
camptothecin	BRD-K37890730	6	0.1235um	FDR	A549	sirolimus	BRD-A79768653	24	10um	FDR	A549	0.00173527	1.8601
cerulenin	BRD-K52075040	6	44.4um	FDR	HEPG2	sirolimus	BRD-K84937637	24	10um	FDR	A549	0.00173977	0.757379
arctigenin	BRD-K53523901	6	2.5um	FDR	HEPG2	sirolimus	BRD-A50287119	24.4	10um	FDR	NEU.KCL	0.00174187	0.825246
BRD-A14178283	BRD-A14178283	6	10um	FDR	HEPG2	sirolimus	BRD-A79768653	6	10um	FDR	HT29	0.00174269	1.4992
verrucarin-a	BRD-A26002865	24	10um	FDR	NPC	sirolimus	BRD-K84937637	6	10um	FDR	A549	0.00174357	1.0632
butein	BRD-K17497770	6	10um	FDR	HEPG2	sirolimus	BRD-A79768653	6	10um	FDR	HT29	0.00174508	2.30044
hydrocortisone	BRD-A65767837	6	10um	FDR	A549	sirolimus	BRD-A79768653	6	10um	FDR	HT29	0.00174508	2.30044
daunorubicin	BRD-K43389675	6	10um	FDR	HT29	sirolimus	BRD-K84937637	6	0.1235um	FDR	A549	0.00174548	1.31416
epoxycholesterol	BRD-K61480498	24	10um	FDR	A549	sirolimus	BRD-A50287119	24	10um	FDR	NPC	0.00174781	1.30253
digoxin	BRD-K23478508	6	10um	FDR	A549	sirolimus	BRD-A79768653	6	10um	FDR	A549	0.00174875	1.03424
westcort	BRD-A23290232	6	10um	FDR	A549	sirolimus	BRD-A79768653	24	10um	FDR	HT29	0.00175192	2.35422
digoxin	BRD-A75144621	6	10um	FDR	A549	sirolimus	BRD-A79768653	6	10um	FDR	HT29	0.00175588	1.9933
geldanamycin	BRD-A19500257	6	10um	FDR	HT29	sirolimus	BRD-K89626439	6	10um	FDR	A549	0.00175638	Inf
thapsigargin	BRD-A62809825	6	10um	FDR	A549	sirolimus	BRD-K84937637	24	10um	FDR	NPC	0.0017592	1.22583
resveratrol	BRD-K80738081	6	0.0412um	FDR	A549	sirolimus	BRD-K84937637	6	1.1111um	FDR	A549	0.00176514	1.97547
rhodomyrtoxin-b	BRD-A08003242	24	10um	FDR	HT29	sirolimus	BRD-K84937637	6	0.3704um	FDR	A549	0.00176742	2.10716
harmine	BRD-K30984264	6	10um	FDR	NPC	sirolimus	BRD-A50287119	6	10um	FDR	NPC	0.00177036	1.07662
geldanamycin	BRD-A19500257	6	10um	FDR	HT29	sirolimus	BRD-K84937637	6	10um	FDR	HT29	0.00177657	2.9829
bufalin	BRD-K63606607	6	10um	FDR	A549	sirolimus	BRD-K89626439	6	10um	FDR	HT29	0.0017766	3.07075
cyclosporin-a	BRD-A38030642	6	10um	FDR	A549	sirolimus	BRD-K89626439	6	10um	FDR	HT29	0.0017766	3.07075
butein	BRD-K17497770	6	10um	FDR	A549	sirolimus	BRD-A79768653	6	10um	FDR	A549	0.0017766	3.07075
lovastatin	BRD-K09416995	6	10um	FDR	HEPG2	sirolimus	BRD-A79768653	6	10um	FDR	A549	0.0017766	3.07075
oligomycin-a	BRD-A81541225	6	10um	FDR	HT29	sirolimus	BRD-A79768653	6	10um	FDR	A549	0.0017766	3.07075
penitrem-a	BRD-K03842655	6	10um	FDR	HT29	sirolimus	BRD-A79768653	6	10um	FDR	A549	0.0017766	3.07075
testosterone	BRD-A48720949	24	10um	FDR	NPC	sirolimus	BRD-A79768653	6	10um	FDR	A549	0.0017766	3.07075
doxorubicin	BRD-A76941896	6	10um	FDR	A549	metformin	BRD-K79602928	6	10um	FDR	HT29	0.00177908	0.528794
daunorubicin	BRD-A68009927	6	10um	FDR	HEPG2	sirolimus	BRD-A50287119	24.4	10um	FDR	NEU.KCL	0.00177953	0.939878
donepezil	BRD-A49160188	24	10um	FDR	A549	sirolimus	BRD-A79768653	24	10um	FDR	A549	0.00178077	2.82201
cycloheximide	BRD-K36055864	6	10um	FDR	HT29	sirolimus	BRD-K84937637	6	10um	FDR	A549	0.00178108	1.23592
podophyllotoxin	BRD-K47869605	24	10um	FDR	NPC	sirolimus	BRD-K89626439	24	10um	FDR	NPC	0.00178136	1.89398
geranylgeraniol	BRD-K95402279	6	10um	FDR	A549	sirolimus	BRD-K99369265	6	10um	FDR	A549	0.00178229	2.86627
3,3'-diindolylmethane	BRD-K37846922	24.4	10um	FDR	NEU.KCL	sirolimus	BRD-A50287119	24.4	10um	FDR	NEU.KCL	0.0017861	3.59472
erythromycin	BRD-K63550407	6	10um	FDR	A549	sirolimus	BRD-A50287119	24.4	10um	FDR	NEU.KCL	0.0017861	3.59472
tamoxifen	BRD-K43744935	6	10um	FDR	A549	sirolimus	BRD-A50287119	24.4	10um	FDR	NEU.KCL	0.0017861	3.59472
camptothecin	BRD-K37890730	6	1.1111um	FDR	A549	sirolimus	BRD-K84937637	6	0.0046um	FDR	A549	0.00179119	1.80894
pidorubicine	BRD-K04548931	6	10um	FDR	HEPG2	sirolimus	BRD-A79768653	6	10um	FDR	A549	0.00179124	1.23342
cycloheximide	BRD-K36055864	6.4	10um	FDR	NEU.KCL	sirolimus	BRD-A79768653	6	10um	FDR	A549	0.00179321	1.4685
doxorubicin	BRD-K92093830	6	10um	FDR	A549	sirolimus	BRD-A50287119	24	10um	FDR	NPC	0.00180132	1.14222
BRD-A14178283	BRD-A14178283	6	10um	FDR	HEPG2	sirolimus	BRD-K84937637	6	10um	FDR	A549	0.00181295	1.11627
BRD-A62200266	BRD-A62200266	24	10um	FDR	A549	sirolimus	BRD-K84937637	6	0.1235um	FDR	A549	0.00183507	1.31622
hydrocortisone	BRD-A25143711	24	10um	FDR	A549	sirolimus	BRD-A79768653	6	10um	FDR	HT29	0.00184586	1.78619
digoxin	BRD-K23478508	24	10um	FDR	NPC	sirolimus	BRD-K84937637	24	10um	FDR	A549	0.00184655	0.530288
rotenone	BRD-K08316444	24	10um	FDR	NPC	sirolimus	BRD-K84937637	6	0.0046um	FDR	A549	0.00185578	2.07609
thapsigargin	BRD-A62809825	24	10um	FDR	A549	sirolimus	BRD-K84937637	6	0.0046um	FDR	A549	0.0018607	1.81617
evoxine	BRD-K47693913	6	10um	FDR	HEPG2	sirolimus	BRD-K84937637	6	0.1235um	FDR	A549	0.00186177	4.41411
thapsigargin	BRD-A62809825	6	10um	FDR	HT29	sirolimus	BRD-A23770159	6	11.1um	FDR	HT29	0.00186423	Inf
cyclosporin-a	BRD-A69815203	6	10um	FDR	A549	sirolimus	BRD-K84937637	6	10um	FDR	HEPG2	0.00186584	3.97552
A-23187	BRD-K41431477	6	10um	FDR	HEPG2	sirolimus	BRD-A50287119	24.4	10um	FDR	NEU.KCL	0.00186723	0.758372
emetine	BRD-A25687296	24	10um	FDR	A549	sirolimus	BRD-K99369265	6	10um	FDR	A549	0.00187164	1.29733
ouabain	BRD-A68930007	24	10um	FDR	A549	sirolimus	BRD-K84937637	6	10um	FDR	A549	0.00187849	1.10741
ellipticine	BRD-K85985071	24	10um	FDR	HEPG2	sirolimus	BRD-A23770159	6	11.1um	FDR	HEPG2	0.00188588	0.577555
celastrol	BRD-A80960055	6	10um	FDR	A549	sirolimus	BRD-A50287119	6	10um	FDR	NPC	0.00188589	0.683351
ouabain	BRD-A46747628	24	10um	FDR	NPC	sirolimus	BRD-A50287119	24.4	10um	FDR	NEU.KCL	0.00188811	0.871113
anisomycin	BRD-K82261406	6	10um	FDR	NPC	sirolimus	BRD-A50287119	24	10um	FDR	NPC	0.00189132	0.976408
AICA-ribonucleotide	BRD-A67373739	24	10um	FDR	HT29	sirolimus	BRD-A79768653	24	10um	FDR	HT29	0.00189786	Inf
doconexent	BRD-K39965020	6	10um	FDR	HEPG2	sirolimus	BRD-A79768653	24	10um	FDR	HT29	0.00189786	Inf
eriodictyol	BRD-A35033682	6	10um	FDR	HEPG2	sirolimus	BRD-A79768653	24	10um	FDR	HT29	0.00189786	Inf
estradiol	BRD-K18910433	6	10um	FDR	NPC	sirolimus	BRD-A79768653	24	10um	FDR	HT29	0.00189786	Inf
hydrocortisone	BRD-A25143711	6	10um	FDR	HT29	sirolimus	BRD-A79768653	24	10um	FDR	HT29	0.00189786	Inf
hydroquinidine	BRD-A06390036	6	10um	FDR	HT29	sirolimus	BRD-A79768653	24	10um	FDR	HT29	0.00189786	Inf
lasalocid	BRD-K10207760	6	10um	FDR	HEPG2	sirolimus	BRD-A79768653	24	10um	FDR	HT29	0.00189786	Inf
lovastatin	BRD-K09416995	6	10um	FDR	NPC	sirolimus	BRD-A79768653	24	10um	FDR	HT29	0.00189786	Inf
lovastatin	BRD-A70155556	6	40um	FDR	HT29	sirolimus	BRD-A79768653	24	10um	FDR	HT29	0.00189786	Inf
menadione	BRD-K78126613	24	10um	FDR	HT29	sirolimus	BRD-A79768653	24	10um	FDR	HT29	0.00189786	Inf
NU-1025	BRD-K48692744	24	10um	FDR	HT29	sirolimus	BRD-A79768653	24	10um	FDR	HT29	0.00189786	Inf
paxilline	BRD-K38251852	24	10um	FDR	HT29	sirolimus	BRD-A79768653	24	10um	FDR	HT29	0.00189786	Inf
quinidine	BRD-K59632282	6	10um	FDR	HT29	sirolimus	BRD-A79768653	24	10um	FDR	HT29	0.00189786	Inf
resveratrol	BRD-K80738081	24	10um	FDR	HT29	sirolimus	BRD-A79768653	24	10um	FDR	HT29	0.00189786	Inf
rottlerin	BRD-K03816923	6	10um	FDR	HT29	sirolimus	BRD-A79768653	24	10um	FDR	HT29	0.00189786	Inf
rottlerin	BRD-K39256324	6	10um	FDR	HT29	sirolimus	BRD-A79768653	24	10um	FDR	HT29	0.00189786	Inf
tacrolimus	BRD-K69608737	6	10um	FDR	HEPG2	sirolimus	BRD-A79768653	24	10um	FDR	HT29	0.00189786	Inf
withaferin-a	BRD-A52193669	6	10um	FDR	HT29	sirolimus	BRD-K84937637	6	10um	FDR	A549	0.00190577	1.17493
mycophenolic-acid	BRD-K31542390	6	10um	FDR	HEPG2	sirolimus	BRD-A23770159	6	11.1um	FDR	HEPG2	0.00190887	1.60189
trichostatin-a	BRD-K68202742	6	10um	FDR	A549	sirolimus	BRD-K89626439	24	10um	FDR	NPC	0.00190975	2.34704
carnosol	BRD-K67265981	6	10um	FDR	NPC	sirolimus	BRD-K89626439	24	10um	FDR	A549	0.00191254	2.32782
thapsigargin	BRD-A62809825	6	10um	FDR	A549	sirolimus	BRD-K84937637	6	10um	FDR	HEPG2	0.00191484	3.18407
ellipticine	BRD-K85985071	24	2.5um	FDR	HEPG2	sirolimus	BRD-A79768653	6	10um	FDR	HT29	0.00191845	1.40484
mycophenolic-acid	BRD-K31542390	6	10um	FDR	HT29	sirolimus	BRD-K84937637	24	10um	FDR	NPC	0.0019226	2.89787
thapsigargin	BRD-K69023402	6.4	10um	FDR	NEU.KCL	sirolimus	BRD-K84937637	24	10um	FDR	NPC	0.0019226	2.89787
mycophenolic-acid	BRD-K63750851	6	2.5um	FDR	HEPG2	sirolimus	BRD-A23770159	6	11.1um	FDR	HEPG2	0.00192441	1.15062
pidorubicine	BRD-K04548931	24	10um	FDR	A549	sirolimus	BRD-A50287119	24.4	10um	FDR	NEU.KCL	0.0019258	0.774188
ingenol	BRD-A52650764	24	10um	FDR	HT29	sirolimus	BRD-K84937637	6	10um	FDR	HEPG2	0.0019269	3.19904
chaetocin	BRD-A85860691	6	0.08um	FDR	HEPG2	sirolimus	BRD-K84937637	6	3.3333um	FDR	A549	0.00192729	1.48226
HO-013	BRD-K86465814	6	10um	FDR	A549	sirolimus	BRD-K84937637	24	10um	FDR	A549	0.00193189	0.614725
cyclosporin-a	BRD-K13533483	24	10um	FDR	A549	sirolimus	BRD-K84937637	6	0.3704um	FDR	A549	0.00193234	3.87224
thapsigargin	BRD-A62809825	6	10um	FDR	A549	sirolimus	BRD-K84937637	24	10um	FDR	A549	0.00193236	0.673209
naringenin	BRD-A94669766	6	10um	FDR	A549	sirolimus	BRD-K84937637	24	10um	FDR	A549	0.00193931	0.538035
apicidin	BRD-A63989068	6	10um	FDR	NPC	sirolimus	BRD-A79768653	6	10um	FDR	A549	0.00194608	0.988326
caffeic-acid-phenethyl-ester	BRD-K96188950	6	17.5867um	FDR	HEPG2	sirolimus	BRD-A79768653	24	10um	FDR	A549	0.00195644	1.83372
prostratin	BRD-K91145395	6	10um	FDR	HT29	sirolimus	BRD-A50287119	6	10um	FDR	NPC	0.00195815	0.769475
verrucarin-a	BRD-A26002865	6	10um	FDR	A549	sirolimus	BRD-A79768653	6	10um	FDR	HT29	0.00196	1.40678
homoharringtonine	BRD-K76674262	6	2.5um	FDR	HEPG2	sirolimus	BRD-A50287119	24	10um	FDR	NPC	0.00196047	0.971016
rottlerin	BRD-K03816923	6	9.68um	FDR	A549	metformin	BRD-K79602928	6	10um	FDR	HT29	0.00196292	0.871061
A-23187	BRD-K41431477	24	2.5um	FDR	HEPG2	sirolimus	BRD-A79768653	6	10um	FDR	HT29	0.00196369	1.49529
acadesine	BRD-A81585303	24.4	10um	FDR	NEU.KCL	sirolimus	BRD-A50287119	24.4	10um	FDR	NEU.KCL	0.00196896	2.50636
rottlerin	BRD-K39256324	24	10um	FDR	A549	sirolimus	BRD-A50287119	24.4	10um	FDR	NEU.KCL	0.00196896	2.50636
caffeic-acid-phenethyl-ester	BRD-K96188950	6	17.5867um	FDR	HEPG2	sirolimus	BRD-A79768653	6	10um	FDR	A549	0.00196926	1.21951
indirubin	BRD-K17894950	24	10um	FDR	HT29	sirolimus	BRD-A79768653	24	10um	FDR	HT29	0.00197618	1.95865
helveticoside	BRD-A63998256	24	10um	FDR	A549	sirolimus	BRD-A79768653	6	10um	FDR	A549	0.00198204	1.73387
BRD-A04172077	BRD-A04172077	24	10um	FDR	A549	sirolimus	BRD-K89626439	24	10um	FDR	A549	0.00198823	Inf
BRD-A26347577	BRD-A26347577	6	10um	FDR	NPC	sirolimus	BRD-A50287119	24	10um	FDR	NPC	0.00198823	Inf
BRD-A26347577	BRD-A26347577	6	10um	FDR	NPC	sirolimus	BRD-K89626439	24	10um	FDR	A549	0.00198823	Inf
BRD-K19653414	BRD-K19653414	6	10um	FDR	NPC	sirolimus	BRD-A50287119	24	10um	FDR	NPC	0.00198823	Inf
BRD-K19653414	BRD-K19653414	6	10um	FDR	NPC	sirolimus	BRD-K89626439	24	10um	FDR	A549	0.00198823	Inf
BRD-K65981456	BRD-K65981456	6	10um	FDR	NPC	sirolimus	BRD-A50287119	24	10um	FDR	NPC	0.00198823	Inf
BRD-K65981456	BRD-K65981456	6	10um	FDR	NPC	sirolimus	BRD-K89626439	24	10um	FDR	A549	0.00198823	Inf
BRD-K97808269	BRD-K97808269	6	10um	FDR	NPC	sirolimus	BRD-A50287119	24	10um	FDR	NPC	0.00198823	Inf
BRD-K97808269	BRD-K97808269	6	10um	FDR	NPC	sirolimus	BRD-K89626439	24	10um	FDR	A549	0.00198823	Inf
clomifene	BRD-K04218075	6	10um	FDR	HEPG2	sirolimus	BRD-A50287119	24	10um	FDR	NPC	0.00198823	Inf
clomifene	BRD-K04218075	6	10um	FDR	HEPG2	sirolimus	BRD-K89626439	24	10um	FDR	A549	0.00198823	Inf
eriodictyol	BRD-A35033682	6	10um	FDR	HEPG2	sirolimus	BRD-K89626439	24	10um	FDR	A549	0.00198823	Inf
estradiol	BRD-K18910433	6	10um	FDR	HEPG2	sirolimus	BRD-A50287119	24	10um	FDR	NPC	0.00198823	Inf
estradiol	BRD-K18910433	6	10um	FDR	NPC	sirolimus	BRD-K89626439	24	10um	FDR	A549	0.00198823	Inf
farnesylpyrophosphate	BRD-A57226833	6	10um	FDR	NPC	sirolimus	BRD-A50287119	24	10um	FDR	NPC	0.00198823	Inf
farnesylpyrophosphate	BRD-A57226833	6	10um	FDR	NPC	sirolimus	BRD-K89626439	24	10um	FDR	A549	0.00198823	Inf
fluorouracil	BRD-K24844714	6	0.0137um	FDR	A549	sirolimus	BRD-K84937637	6	0.0137um	FDR	A549	0.00198823	Inf
geranyl-geranyl-pyrophosphate	BRD-A14999564	6.4	10um	FDR	NEU.KCL	sirolimus	BRD-A50287119	24	10um	FDR	NPC	0.00198823	Inf
geranyl-geranyl-pyrophosphate	BRD-A14999564	6.4	10um	FDR	NEU.KCL	sirolimus	BRD-K89626439	24	10um	FDR	A549	0.00198823	Inf
geranyl-geranyl-pyrophosphate	BRD-A14999564	6	10um	FDR	NPC	sirolimus	BRD-A50287119	24	10um	FDR	NPC	0.00198823	Inf
geranyl-geranyl-pyrophosphate	BRD-A14999564	6	10um	FDR	NPC	sirolimus	BRD-K89626439	24	10um	FDR	A549	0.00198823	Inf
hydroxytyrosol	BRD-K04809113	6	10um	FDR	NPC	sirolimus	BRD-A50287119	24	10um	FDR	NPC	0.00198823	Inf
hydroxytyrosol	BRD-K04809113	6	10um	FDR	NPC	sirolimus	BRD-K89626439	24	10um	FDR	A549	0.00198823	Inf
lasalocid	BRD-K10207760	6	10um	FDR	HEPG2	sirolimus	BRD-K89626439	24	10um	FDR	A549	0.00198823	Inf
salsolinol	BRD-A26112980	6	10um	FDR	NPC	sirolimus	BRD-A50287119	24	10um	FDR	NPC	0.00198823	Inf
salsolinol	BRD-A26112980	6	10um	FDR	NPC	sirolimus	BRD-K89626439	24	10um	FDR	A549	0.00198823	Inf
synephrine	BRD-A04327189	24	10um	FDR	A549	sirolimus	BRD-A50287119	24	10um	FDR	NPC	0.00198823	Inf
synephrine	BRD-A04327189	24	10um	FDR	A549	sirolimus	BRD-K89626439	24	10um	FDR	A549	0.00198823	Inf
tacrolimus	BRD-K69608737	6	10um	FDR	HEPG2	sirolimus	BRD-K89626439	24	10um	FDR	A549	0.00198823	Inf
lasalocid	BRD-A72711497	24	10um	FDR	HT29	sirolimus	BRD-A23770159	6	11.1um	FDR	A549	0.00199957	1.76854
phloretin	BRD-K15563106	24	177.6um	FDR	HT29	sirolimus	BRD-K84937637	24	10um	FDR	NPC	0.00201043	1.57458
verrucarin-a	BRD-A26002865	6	10um	FDR	A549	sirolimus	BRD-K84937637	6	10um	FDR	A549	0.00201129	0.951951
cyclosporin-a	BRD-A38030642	24	10um	FDR	HT29	sirolimus	BRD-A50287119	6	10um	FDR	NPC	0.00201325	0.91754
trichostatin-a	BRD-K68202742	6	10um	FDR	A549	sirolimus	BRD-K89626439	6	10um	FDR	HT29	0.00201462	3.02313
antimycin-a	BRD-A52886023	24	10um	FDR	A549	sirolimus	BRD-K99369265	6	10um	FDR	A549	0.00201552	4.3705
mitomycin-c	BRD-A48237631	24	10um	FDR	NPC	sirolimus	BRD-A79768653	24	10um	FDR	A549	0.00201651	1.60537
hydroxycholesterol	BRD-K35307346	6	10um	FDR	NPC	sirolimus	BRD-K89626439	24	10um	FDR	A549	0.00201719	1.35451
hydroxycholesterol	BRD-A36707673	24	10um	FDR	NPC	sirolimus	BRD-K89626439	24	10um	FDR	NPC	0.00202433	3.8712
ketocholesterol	BRD-A77144340	6	10um	FDR	NPC	sirolimus	BRD-K89626439	24	10um	FDR	NPC	0.00202433	3.8712
ouabain	BRD-K35708212	6	10um	FDR	A549	sirolimus	BRD-A79768653	6	10um	FDR	HT29	0.00204084	1.63269
skatole	BRD-K73824630	24	10um	FDR	NPC	sirolimus	BRD-A79768653	6	10um	FDR	HT29	0.00204084	1.63269
alpha-linolenic-acid	BRD-K33396764	6	10um	FDR	A549	metformin	BRD-K79602928	6	10um	FDR	HT29	0.00204759	0.551687
1,2,3,4-tetrahydroisoquinoline	BRD-K18436203	6.4	10um	FDR	NEU.KCL	metformin	BRD-K79602928	6	10um	FDR	A549	0.00204918	Inf
5-hydroxytryptophan	BRD-A00150179	24.4	10um	FDR	NEU.KCL	metformin	BRD-K79602928	6.4	10um	FDR	NEU.KCL	0.00204918	Inf
5-hydroxytryptophan	BRD-A00150179	24.4	10um	FDR	NEU.KCL	metformin	BRD-K79602928	6	10um	FDR	NPC	0.00204918	Inf
alpha-linolenic-acid	BRD-K33396764	6	10um	FDR	HEPG2	metformin	BRD-K79602928	6.4	10um	FDR	NEU.KCL	0.00204918	Inf
alpha-linolenic-acid	BRD-K33396764	6	10um	FDR	HEPG2	metformin	BRD-K79602928	6	10um	FDR	NPC	0.00204918	Inf
androstenedione	BRD-K32610195	6.4	10um	FDR	NEU.KCL	metformin	BRD-K79602928	6.4	10um	FDR	NEU.KCL	0.00204918	Inf
androstenedione	BRD-K32610195	6.4	10um	FDR	NEU.KCL	metformin	BRD-K79602928	6	10um	FDR	NPC	0.00204918	Inf
apigenin	BRD-K01493881	6	10um	FDR	NPC	metformin	BRD-K79602928	6.4	10um	FDR	NEU.KCL	0.00204918	Inf
apigenin	BRD-K01493881	6	10um	FDR	NPC	metformin	BRD-K79602928	6	10um	FDR	NPC	0.00204918	Inf
bongkrek-acid	BRD-A41301928	6	10um	FDR	A549	metformin	BRD-K79602928	6.4	10um	FDR	NEU.KCL	0.00204918	Inf
bongkrek-acid	BRD-A41301928	6	10um	FDR	A549	metformin	BRD-K79602928	6	10um	FDR	NPC	0.00204918	Inf
BRD-A26347577	BRD-A26347577	24.4	10um	FDR	NEU.KCL	metformin	BRD-K79602928	6.4	10um	FDR	NEU.KCL	0.00204918	Inf
BRD-A26347577	BRD-A26347577	24.4	10um	FDR	NEU.KCL	metformin	BRD-K79602928	6	10um	FDR	NPC	0.00204918	Inf
BRD-A95820578	BRD-A95820578	6	10um	FDR	A549	metformin	BRD-K79602928	6.4	10um	FDR	NEU.KCL	0.00204918	Inf
BRD-A95820578	BRD-A95820578	6	10um	FDR	A549	metformin	BRD-K79602928	6	10um	FDR	NPC	0.00204918	Inf
BRD-K49061529	BRD-K49061529	6	10um	FDR	HEPG2	metformin	BRD-K79602928	6.4	10um	FDR	NEU.KCL	0.00204918	Inf
BRD-K49061529	BRD-K49061529	6	10um	FDR	HEPG2	metformin	BRD-K79602928	6	10um	FDR	NPC	0.00204918	Inf
BRD-K52640952	BRD-K52640952	6	10um	FDR	A549	metformin	BRD-K79602928	6.4	10um	FDR	NEU.KCL	0.00204918	Inf
BRD-K52640952	BRD-K52640952	6	10um	FDR	A549	metformin	BRD-K79602928	6	10um	FDR	NPC	0.00204918	Inf
BRD-K59460069	BRD-K59460069	6	10um	FDR	A549	metformin	BRD-K79602928	6.4	10um	FDR	NEU.KCL	0.00204918	Inf
BRD-K59460069	BRD-K59460069	6	10um	FDR	A549	metformin	BRD-K79602928	6	10um	FDR	NPC	0.00204918	Inf
BRD-K95847244	BRD-K95847244	24.4	10um	FDR	NEU.KCL	metformin	BRD-K79602928	6.4	10um	FDR	NEU.KCL	0.00204918	Inf
BRD-K95847244	BRD-K95847244	24.4	10um	FDR	NEU.KCL	metformin	BRD-K79602928	6	10um	FDR	NPC	0.00204918	Inf
BRD-K98519396	BRD-K98519396	6	10um	FDR	A549	metformin	BRD-K79602928	6.4	10um	FDR	NEU.KCL	0.00204918	Inf
BRD-K98519396	BRD-K98519396	6	10um	FDR	A549	metformin	BRD-K79602928	6	10um	FDR	NPC	0.00204918	Inf
caffeic-acid	BRD-K84709232	6	10um	FDR	HEPG2	metformin	BRD-K79602928	6.4	10um	FDR	NEU.KCL	0.00204918	Inf
caffeic-acid	BRD-K84709232	6	10um	FDR	HEPG2	metformin	BRD-K79602928	6	10um	FDR	NPC	0.00204918	Inf
caffeic-acid	BRD-K84709232	6	10um	FDR	A549	metformin	BRD-K79602928	6	10um	FDR	A549	0.00204918	Inf
caffeine	BRD-K02404261	6	10um	FDR	NPC	metformin	BRD-K79602928	6.4	10um	FDR	NEU.KCL	0.00204918	Inf
caffeine	BRD-K02404261	6	10um	FDR	NPC	metformin	BRD-K79602928	6	10um	FDR	NPC	0.00204918	Inf
caffeine	BRD-K02404261	6	10um	FDR	A549	metformin	BRD-K79602928	6.4	10um	FDR	NEU.KCL	0.00204918	Inf
caffeine	BRD-K02404261	6	10um	FDR	A549	metformin	BRD-K79602928	6	10um	FDR	NPC	0.00204918	Inf
capecitabine	BRD-K61192372	6	10um	FDR	A549	metformin	BRD-K79602928	6.4	10um	FDR	NEU.KCL	0.00204918	Inf
capecitabine	BRD-K61192372	6	10um	FDR	A549	metformin	BRD-K79602928	6	10um	FDR	NPC	0.00204918	Inf
dantron	BRD-K10065684	6	10um	FDR	A549	metformin	BRD-K79602928	6.4	10um	FDR	NEU.KCL	0.00204918	Inf
dantron	BRD-K10065684	6	10um	FDR	A549	metformin	BRD-K79602928	6	10um	FDR	NPC	0.00204918	Inf
deoxycholic-acid	BRD-A08027849	6	10um	FDR	NPC	metformin	BRD-K79602928	6.4	10um	FDR	NEU.KCL	0.00204918	Inf
deoxycholic-acid	BRD-A08027849	6	10um	FDR	NPC	metformin	BRD-K79602928	6	10um	FDR	NPC	0.00204918	Inf
deoxyrhapontin	BRD-K52015643	6	10um	FDR	A549	metformin	BRD-K79602928	6.4	10um	FDR	NEU.KCL	0.00204918	Inf
deoxyrhapontin	BRD-K52015643	6	10um	FDR	A549	metformin	BRD-K79602928	6	10um	FDR	NPC	0.00204918	Inf
depudecin	BRD-K07888107	6	10um	FDR	A549	metformin	BRD-K79602928	6.4	10um	FDR	NEU.KCL	0.00204918	Inf
depudecin	BRD-K07888107	6	10um	FDR	A549	metformin	BRD-K79602928	6	10um	FDR	NPC	0.00204918	Inf
dinoprostone	BRD-K26521938	6	10um	FDR	NPC	metformin	BRD-K79602928	6.4	10um	FDR	NEU.KCL	0.00204918	Inf
dinoprostone	BRD-K26521938	6	10um	FDR	NPC	metformin	BRD-K79602928	6	10um	FDR	NPC	0.00204918	Inf
epitestosterone	BRD-A53131506	6	10um	FDR	A549	metformin	BRD-K79602928	6.4	10um	FDR	NEU.KCL	0.00204918	Inf
epitestosterone	BRD-A53131506	6	10um	FDR	A549	metformin	BRD-K79602928	6	10um	FDR	NPC	0.00204918	Inf
epothilone-a	BRD-K71823332	6	10um	FDR	A549	metformin	BRD-K79602928	6.4	10um	FDR	NEU.KCL	0.00204918	Inf
epothilone-a	BRD-K71823332	6	10um	FDR	A549	metformin	BRD-K79602928	6	10um	FDR	NPC	0.00204918	Inf
estrone	BRD-K81839095	6	10um	FDR	A549	metformin	BRD-K79602928	6.4	10um	FDR	NEU.KCL	0.00204918	Inf
estrone	BRD-K81839095	6	10um	FDR	A549	metformin	BRD-K79602928	6	10um	FDR	NPC	0.00204918	Inf
farnesylpyrophosphate	BRD-A57226833	6.4	10um	FDR	NEU.KCL	metformin	BRD-K79602928	6.4	10um	FDR	NEU.KCL	0.00204918	Inf
farnesylpyrophosphate	BRD-A57226833	6.4	10um	FDR	NEU.KCL	metformin	BRD-K79602928	6	10um	FDR	NPC	0.00204918	Inf
glucosamine	BRD-K70131229	6	10um	FDR	NPC	metformin	BRD-K79602928	6.4	10um	FDR	NEU.KCL	0.00204918	Inf
glucosamine	BRD-K70131229	6	10um	FDR	NPC	metformin	BRD-K79602928	6	10um	FDR	NPC	0.00204918	Inf
hydrastine	BRD-K02715688	6	10um	FDR	A549	metformin	BRD-K79602928	6.4	10um	FDR	NEU.KCL	0.00204918	Inf
hydrastine	BRD-K02715688	6	10um	FDR	A549	metformin	BRD-K79602928	6	10um	FDR	NPC	0.00204918	Inf
hydroxycholesterol	BRD-K35307346	6.4	10um	FDR	NEU.KCL	metformin	BRD-K79602928	6.4	10um	FDR	NEU.KCL	0.00204918	Inf
hydroxycholesterol	BRD-K35307346	6.4	10um	FDR	NEU.KCL	metformin	BRD-K79602928	6	10um	FDR	NPC	0.00204918	Inf
indole	BRD-K01815685	6	10um	FDR	A549	metformin	BRD-K79602928	6.4	10um	FDR	NEU.KCL	0.00204918	Inf
indole	BRD-K01815685	6	10um	FDR	A549	metformin	BRD-K79602928	6	10um	FDR	NPC	0.00204918	Inf
isosalsoline	BRD-A20862232	24.4	10um	FDR	NEU.KCL	metformin	BRD-K79602928	6.4	10um	FDR	NEU.KCL	0.00204918	Inf
isosalsoline	BRD-A20862232	24.4	10um	FDR	NEU.KCL	metformin	BRD-K79602928	6	10um	FDR	NPC	0.00204918	Inf
kavain	BRD-A75455249	6	10um	FDR	A549	metformin	BRD-K79602928	6.4	10um	FDR	NEU.KCL	0.00204918	Inf
kavain	BRD-A75455249	6	10um	FDR	A549	metformin	BRD-K79602928	6	10um	FDR	NPC	0.00204918	Inf
lobendazole	BRD-K15834839	6	10um	FDR	A549	metformin	BRD-K79602928	6.4	10um	FDR	NEU.KCL	0.00204918	Inf
lobendazole	BRD-K15834839	6	10um	FDR	A549	metformin	BRD-K79602928	6	10um	FDR	NPC	0.00204918	Inf
lupanine	BRD-A92826379	6	10um	FDR	A549	metformin	BRD-K79602928	6.4	10um	FDR	NEU.KCL	0.00204918	Inf
lupanine	BRD-A92826379	6	10um	FDR	A549	metformin	BRD-K79602928	6	10um	FDR	NPC	0.00204918	Inf
nelfinavir	BRD-K74117820	24	10um	FDR	A549	metformin	BRD-K79602928	6.4	10um	FDR	NEU.KCL	0.00204918	Inf
nelfinavir	BRD-K74117820	24	10um	FDR	A549	metformin	BRD-K79602928	6	10um	FDR	NPC	0.00204918	Inf
nelfinavir	BRD-K74117820	6	10um	FDR	A549	metformin	BRD-K79602928	6	10um	FDR	A549	0.00204918	Inf
phenacetin	BRD-K38323065	6	10um	FDR	A549	metformin	BRD-K79602928	6.4	10um	FDR	NEU.KCL	0.00204918	Inf
phenacetin	BRD-K38323065	6	10um	FDR	A549	metformin	BRD-K79602928	6	10um	FDR	NPC	0.00204918	Inf
phenolphthalein	BRD-K19227686	6	10um	FDR	A549	metformin	BRD-K79602928	6.4	10um	FDR	NEU.KCL	0.00204918	Inf
phenolphthalein	BRD-K19227686	6	10um	FDR	A549	metformin	BRD-K79602928	6	10um	FDR	NPC	0.00204918	Inf
piceid	BRD-K43236057	24	10um	FDR	A549	metformin	BRD-K79602928	6.4	10um	FDR	NEU.KCL	0.00204918	Inf
piceid	BRD-K43236057	24	10um	FDR	A549	metformin	BRD-K79602928	6	10um	FDR	NPC	0.00204918	Inf
progesterone	BRD-K64994968	6	10um	FDR	HEPG2	metformin	BRD-K79602928	6.4	10um	FDR	NEU.KCL	0.00204918	Inf
progesterone	BRD-K64994968	6	10um	FDR	HEPG2	metformin	BRD-K79602928	6	10um	FDR	NPC	0.00204918	Inf
quinidine	BRD-A64479082	6.4	10um	FDR	NEU.KCL	metformin	BRD-K79602928	6.4	10um	FDR	NEU.KCL	0.00204918	Inf
quinidine	BRD-A64479082	6.4	10um	FDR	NEU.KCL	metformin	BRD-K79602928	6	10um	FDR	NPC	0.00204918	Inf
retinyl	BRD-K65331431	6.4	10um	FDR	NEU.KCL	metformin	BRD-K79602928	6.4	10um	FDR	NEU.KCL	0.00204918	Inf
retinyl	BRD-K65331431	6.4	10um	FDR	NEU.KCL	metformin	BRD-K79602928	6	10um	FDR	NPC	0.00204918	Inf
rosiglitazone	BRD-A97437073	6.4	10um	FDR	NEU.KCL	metformin	BRD-K79602928	6.4	10um	FDR	NEU.KCL	0.00204918	Inf
rosiglitazone	BRD-A97437073	6.4	10um	FDR	NEU.KCL	metformin	BRD-K79602928	6	10um	FDR	NPC	0.00204918	Inf
spermidine	BRD-K40438880	6	10um	FDR	NPC	metformin	BRD-K79602928	6.4	10um	FDR	NEU.KCL	0.00204918	Inf
spermidine	BRD-K40438880	6	10um	FDR	NPC	metformin	BRD-K79602928	6	10um	FDR	NPC	0.00204918	Inf
strychnine	BRD-A09094913	6	10um	FDR	A549	metformin	BRD-K79602928	6.4	10um	FDR	NEU.KCL	0.00204918	Inf
strychnine	BRD-A09094913	6	10um	FDR	A549	metformin	BRD-K79602928	6	10um	FDR	NPC	0.00204918	Inf
trehalose	BRD-K54028654	6	10um	FDR	NPC	metformin	BRD-K79602928	6.4	10um	FDR	NEU.KCL	0.00204918	Inf
trehalose	BRD-K54028654	6	10um	FDR	NPC	metformin	BRD-K79602928	6	10um	FDR	NPC	0.00204918	Inf
trioxsalen	BRD-K54790157	6	10um	FDR	A549	metformin	BRD-K79602928	6.4	10um	FDR	NEU.KCL	0.00204918	Inf
trioxsalen	BRD-K54790157	6	10um	FDR	A549	metformin	BRD-K79602928	6	10um	FDR	NPC	0.00204918	Inf
zeranol	BRD-A24381660	24	10um	FDR	A549	metformin	BRD-K79602928	6.4	10um	FDR	NEU.KCL	0.00204918	Inf
zeranol	BRD-A24381660	24	10um	FDR	A549	metformin	BRD-K79602928	6	10um	FDR	NPC	0.00204918	Inf
sphingosine	BRD-K62959606	6	10um	FDR	A549	sirolimus	BRD-K89626439	24	10um	FDR	A549	0.00204921	1.09058
rotenone	BRD-K08316444	6	0.625um	FDR	HEPG2	sirolimus	BRD-K84937637	6	10um	FDR	A549	0.00206207	1.03942
withaferin-a	BRD-A52193669	6	10um	FDR	A549	sirolimus	BRD-A79768653	6	10um	FDR	A549	0.00206719	0.962869
mitomycin-c	BRD-A48237631	24	10um	FDR	A549	sirolimus	BRD-A23770159	24	11.1um	FDR	A549	0.00207101	0.483549
doxorubicin	BRD-A76941896	6	10um	FDR	A549	sirolimus	BRD-K84937637	6	0.0412um	FDR	A549	0.00207441	1.2875
narciclasine	BRD-K06792661	6	10um	FDR	HT29	sirolimus	BRD-A79768653	6	10um	FDR	A549	0.00207584	0.941003
ritonavir	BRD-K51485625	6	10um	FDR	HT29	sirolimus	BRD-K84937637	6	10um	FDR	A549	0.00208071	Inf
arctigenin	BRD-K53523901	24	10um	FDR	HEPG2	sirolimus	BRD-A79768653	6	10um	FDR	A549	0.00208398	0.970063
daunorubicin	BRD-K43389675	6	10um	FDR	A549	sirolimus	BRD-A79768653	6	10um	FDR	A549	0.00208398	0.970063
withaferin-a	BRD-A52193669	6	10um	FDR	A549	sirolimus	BRD-K99369265	6	10um	FDR	A549	0.00209489	1.3213
brefeldin-a	BRD-A31107743	24	0.09um	FDR	HT29	sirolimus	BRD-K89626439	6	10um	FDR	A549	0.00209543	Inf
glutamine	BRD-K83896451	6	0.0015um	FDR	A549	sirolimus	BRD-K84937637	6	10um	FDR	A549	0.00210015	1.27239
brefeldin-a	BRD-A31107743	24	0.09um	FDR	HT29	sirolimus	BRD-A50287119	24.4	10um	FDR	NEU.KCL	0.00210045	0.811453
parthenolide	BRD-K98548675	24	10um	FDR	NPC	sirolimus	BRD-K84937637	24	10um	FDR	A549	0.00211711	0.67295
tamoxifen	BRD-K93754473	24.4	10um	FDR	NEU.KCL	sirolimus	BRD-K84937637	24	10um	FDR	A549	0.00211711	0.67295
lasalocid	BRD-K10207760	24	10um	FDR	A549	sirolimus	BRD-K84937637	24	10um	FDR	NPC	0.00211785	1.71435
butyrolactone	BRD-K68584490	24.4	10um	FDR	NEU.KCL	sirolimus	BRD-K84937637	24	10um	FDR	NPC	0.00212326	2.25426
trichostatin-a	BRD-A19037878	6	10um	FDR	A549	sirolimus	BRD-K84937637	6	10um	FDR	A549	0.00212613	0.997532
ellipticine	BRD-K85985071	6	10um	FDR	HEPG2	sirolimus	BRD-A50287119	6.4	10um	FDR	NEU.KCL	0.00212624	0.636685
tetramethylsilane	BRD-K45988865	6	10um	FDR	HT29	sirolimus	BRD-K84937637	6	0.1235um	FDR	A549	0.00212669	1.35956
mevastatin	BRD-K94441233	24	10um	FDR	NPC	sirolimus	BRD-A79768653	24	10um	FDR	A549	0.00214066	2.74685
thapsigargin	BRD-A62809825	6	10um	FDR	A549	sirolimus	BRD-A50287119	24.4	10um	FDR	NEU.KCL	0.00214112	0.880107
capsaicin	BRD-K50590187	6	160um	FDR	A549	sirolimus	BRD-A23770159	6	11.1um	FDR	A549	0.00214148	2.75684
carnosol	BRD-K67265981	6	10um	FDR	NPC	sirolimus	BRD-A79768653	6	10um	FDR	HT29	0.00214148	2.75684
trichostatin-a	BRD-K68202742	24	10um	FDR	A549	sirolimus	BRD-K84937637	6	10um	FDR	A549	0.00214296	1.00245
daunorubicin	BRD-A68009927	6	10um	FDR	HT29	sirolimus	BRD-A79768653	6	10um	FDR	HEPG2	0.00214544	1.93076
hydroxycholesterol	BRD-K35307346	24	10um	FDR	NPC	sirolimus	BRD-A79768653	6	10um	FDR	A549	0.0021543	1.15577
bufalin	BRD-K63606607	6	10um	FDR	A549	sirolimus	BRD-A79768653	6	10um	FDR	HT29	0.00215474	1.94111
epigallocatechin	BRD-K19216856	6	88.8um	FDR	A549	sirolimus	BRD-A79768653	6	10um	FDR	A549	0.00215474	1.94111
rottlerin	BRD-K03816923	6	9.68um	FDR	A549	sirolimus	BRD-A79768653	6	10um	FDR	HT29	0.00216294	1.75116
rottlerin	BRD-K03816923	6	9.68um	FDR	A549	sirolimus	BRD-A23770159	6	11.1um	FDR	A549	0.00216294	1.75116
cycloheximide	BRD-K36055864	6.4	10um	FDR	NEU.KCL	sirolimus	BRD-A50287119	6.4	10um	FDR	NEU.KCL	0.00216438	1.06674
ingenol	BRD-A52650764	24	10um	FDR	HT29	sirolimus	BRD-A79768653	6	10um	FDR	HEPG2	0.00216674	1.73238
puromycin	BRD-K36007650	6	10um	FDR	HEPG2	sirolimus	BRD-K84937637	6	1.1111um	FDR	A549	0.00217524	4.32863
guggulsterone	BRD-A86109770	6	10um	FDR	A549	sirolimus	BRD-A79768653	6	10um	FDR	A549	0.00217528	Inf
nelfinavir	BRD-K60460488	6	10um	FDR	HT29	sirolimus	BRD-A79768653	6	10um	FDR	A549	0.00217528	Inf
paxilline	BRD-K38251852	24	10um	FDR	HT29	sirolimus	BRD-A79768653	6	10um	FDR	A549	0.00217528	Inf
rhamnetin	BRD-K37206356	6	10um	FDR	HEPG2	sirolimus	BRD-A79768653	6	10um	FDR	A549	0.00217528	Inf
theophylline	BRD-K97799481	6	10um	FDR	A549	sirolimus	BRD-A79768653	6	10um	FDR	A549	0.00217528	Inf
withaferin-a	BRD-A52193669	24	10um	FDR	A549	sirolimus	BRD-A50287119	24.4	10um	FDR	NEU.KCL	0.00217685	0.741418
piperlongumine	BRD-K24132293	6	10um	FDR	A549	sirolimus	BRD-A79768653	6	10um	FDR	HT29	0.00217736	1.61985
staurosporine	BRD-K17953061	24.4	10um	FDR	NEU.KCL	sirolimus	BRD-K84937637	24	10um	FDR	NPC	0.00217966	1.0955
doxorubicin	BRD-K92093830	6	10um	FDR	HT29	sirolimus	BRD-A79768653	6	10um	FDR	A549	0.00218558	1.07337
cyclosporin-a	BRD-A38030642	24	10um	FDR	A549	sirolimus	BRD-K84937637	24	10um	FDR	A549	0.00219439	0.850459
skatole	BRD-K73824630	24	10um	FDR	NPC	sirolimus	BRD-A79768653	24	10um	FDR	A549	0.00219882	1.80791
[truncated: 6,299 more rows]
