# Supplementary material for: Towards natural mimetics of metformin and rapamycin
Source: Aging (Albany NY). 2017 Nov 15;9(11):2245–68. doi: 10.18632/aging.101319 (PMC5723685; doi:10.18632/aging.101319)
Supplement: Supplementary file 4 [file aging-09-2245-s004.xlsx]

## Sheet: met_rap_pathway_level_scoring_n
id	concentration	time	pubchem.cid	name	Number of pathways shared with Metformin	Number of pathways shared with Rapamycin
BRD-K63343048	10um	6	3034010	orlistat	267	214
BRD-A65550283	10um	6	100018	ginsenoside	260	217
BRD-K94689771	10um	6	68071	pinocembrin	260	209
BRD-K48935217	10um	24	448013	epothilone	256	207
BRD-K06895174	10um	6	6917697	cisapride	255	220
BRD-K92726801	10um	6	3397945	hydrastinine	255	226
BRD-K17953061	0.119999997318um	24	44259	staurosporine	254	213
BRD-K10670311	10um	6	5359476	sulfasalazine	254	181
BRD-A87719232	10um	6	1302	naproxen	253	220
BRD-K82561139	10um	6	10666	ricinine	253	206
BRD-K17953061	0.0399999991059um	24	44259	staurosporine	253	200
BRD-A88282067	10um	6	441724	delcorine	252	229
BRD-K17953061	0.370000004768um	24	44259	staurosporine	252	199
BRD-K68620903	10um	24	9051	dydrogesterone	251	202
BRD-A49734948	10um	24	2837663	foliosidine	251	238
BRD-K17953061	1.11000001431um	24	44259	staurosporine	251	194
BRD-K43164539	10um	6	221493	cholic-acid	250	203
BRD-K51730347	10um	6	65057	diphencyprone	250	213
BRD-K31542390	10um	6	671222	mycophenolic-acid	250	199
BRD-A49358627	10um	24	2763	ciprofibrate	249	190
BRD-K96527333	10um	6	14709	dehydroisoandosterone	249	229
BRD-K25186396	10um	6	68077	tangeritin	248	225
BRD-K40902647	10um	24	15376	vincamine	248	215
BRD-K01493881	10um	6	5280443	apigenin	247	216
BRD-K64935403	10um	6	73707410	ebelactone-b	247	220
BRD-K43880410	10um	6	8955	pregnenolone	247	210
BRD-K96271548	10um	24	1622530	coumaric-acid	246	225
BRD-A58955223	0.629999995232um	6	5350	sulforaphane	246	207
BRD-K87049188	10um	24	3442	fusaric-acid	245	212
BRD-K15502390	10um	6	4463	nevirapine	245	208
BRD-K06753942	10um	6	72344	nobiletin	245	198
BRD-K37991163	10um	6	62878	paroxetine	245	228
BRD-K50384076	10um	6	5282073	7,4'-dihydroxyflavone	244	225
BRD-A98888159	10um	24	14205635	BRD-A98888159	244	193
BRD-K93618743	10um	6	3747	ipriflavone	244	183
BRD-K17953061	3.32999992371um	24	44259	staurosporine	244	207
BRD-A52886023	10um	6	16218979	antimycin-a	243	232
BRD-K26521938	10um	24	5280360	dinoprostone	243	183
BRD-K48195008	10um	6	5991	ethinylestradiol	243	198
BRD-A66395008	10um	24	24870789	parthenolide	243	210
BRD-K87991767	10um	24	5281426	umbelliferone	243	196
BRD-K24994810	10um	6	101989	androstenol	242	205
BRD-K18910433	0.370000004768um	24	5757	estradiol	242	187
BRD-A67479912	10um	24	5320716	progesterone	242	203
BRD-A85860691	10um	24	161591	chaetocin	241	216
BRD-A98431941	10um	24	6710657	ephedrine	241	202
BRD-A51393488	10um	6	12310313	noscapine	241	218
BRD-K78294846	10um	24	10228	osthol	241	218
BRD-K69556541	10um	24	6610313	ryanodine	241	176
BRD-A65327625	10um	24	16211224	6-hydroxytropinone	240	213
BRD-A64290322	10um	24	5280754	cyclosporin-a	240	229
BRD-K18910433	1.11000001431um	24	5757	estradiol	240	173
BRD-K95402279	10um	6	5281365	geranylgeraniol	240	195
BRD-A52650764	0.0412000007927um	24	5225086	ingenol	240	163
BRD-A19248578	10um	24	6436219	latrunculin-b	240	219
BRD-K38449220	10um	6	5281750	seneciphylline	240	241
BRD-K17110974	10um	24	2236	aristolochic-acid	239	220
BRD-K17110974	10um	6	2236	aristolochic-acid	239	216
BRD-A62200266	10um	24	15560547	BRD-A62200266	239	212
BRD-K19284129	10um	6	128563	salvinorin-a	239	195
BRD-K82381502	10um	6	93565	acetylcholine	238	207
BRD-A33746814	10um	6	73707604	avicin-g	238	233
BRD-A85860691	0.0412000007927um	24	161591	chaetocin	238	185
BRD-K13664374	10um	6	6597	dichloroacetic-acid	238	195
BRD-K92093830	10um	24	443939	doxorubicin	238	217
BRD-K69650333	10um	6	636362	idarubicin	238	217
BRD-K94689771	10um	24	68071	pinocembrin	238	209
BRD-K18135438	10um	24	10133	chenodeoxycholic-acid	237	193
BRD-A64290322	10um	6	5280754	cyclosporin-a	237	220
BRD-K92683369	10um	24	353825	graveoline	237	216
BRD-K39256324	10um	6	5281847	rottlerin	237	204
BRD-K17953061	10um	24	44259	staurosporine	237	210
BRD-A96820077	10um	6	23760135	ungerine	237	228
BRD-K32610195	10um	6	6128	androstenedione	236	215
BRD-A91699651	10um	6	2719	chloroquine	236	207
BRD-K76600340	10um	6	7510	nicotinyl-alcohol-tartrate	236	191
BRD-K65331431	10um	6	638034	retinyl	236	223
BRD-K01493881	10um	24	5280443	apigenin	235	210
BRD-K55191674	10um	6	5904	benzylpenicillin	235	184
BRD-K49448285	10um	24	2399	bisindolylmaleimide	235	184
BRD-A91699651	10um	24	2719	chloroquine	235	210
BRD-K94080537	10um	24	4284	diethyltoluamide	235	220
BRD-K09602097	10um	6	47936	forskolin	235	242
BRD-A71390734	1.11000001431um	24	42594	idarubicin	235	186
BRD-A97437073	10um	6	77999	rosiglitazone	235	200
BRD-A37867643	10um	24	97807	safrolglycol	235	206
BRD-K33572481	10um	24	2733768	taurodeoxycholic-acid	235	189
BRD-K36452089	0.409999996424um	24	16043	tert-butylhydroquinone	235	190
BRD-K87991767	10um	6	5281426	umbelliferone	235	204
BRD-K94841585	10um	6	361510	emodic-acid	234	205
BRD-A19500257	0.119999997318um	24	13017911	geldanamycin	234	189
BRD-A71390734	10um	24	42594	idarubicin	234	205
BRD-K88849294	10um	24	73157	lobaric-acid	234	209
BRD-K78126613	1.11000001431um	24	4055	menadione	234	193
BRD-K03842655	10um	24	6610243	penitrem-a	234	189
BRD-A49906757	10um	6	3000667	scopolamine	234	201
BRD-K62959606	10um	6	5280335	sphingosine	234	203
BRD-A52193669	10um	24	73707417	withaferin-a	234	231
BRD-A15100685	10um	24	73707595	avicin-d	233	234
BRD-A38878059	10um	6	23902994	BL-077	233	220
BRD-A99411506	10um	6	15558439	esculin	233	210
BRD-K17016787	0.370000004768um	24	5756	estriol	233	196
BRD-K76674262	10um	24	285033	homoharringtonine	233	230
BRD-K81062487	10um	6	23687511	taurocholic-acid	233	220
BRD-A15100685	10um	6	73707595	avicin-d	232	223
BRD-K87226815	10um	6	6234	cycloserine	232	215
BRD-A68009927	10um	24	3085107	daunorubicin	232	213
BRD-A52530684	0.119999997318um	24	6916127	doxorubicin	232	205
BRD-K92093830	0.370400011539um	6	443939	doxorubicin	232	199
BRD-K17016787	0.119999997318um	24	5756	estriol	232	181
BRD-A36707673	10um	6	73707416	hydroxycholesterol	232	213
BRD-K66206289	10um	6	101615	lobeline	232	187
BRD-A95445494	10um	24	363863	maackiain	232	201
BRD-K04548931	10um	24	65348	pidorubicine	232	219
BRD-K04548931	10um	6	65348	pidorubicine	232	201
BRD-K83302049	10um	24	4970	protopine	232	197
BRD-K73824630	10um	6	6736	skatole	232	153
BRD-K36452089	100um	24	16043	tert-butylhydroquinone	232	193
BRD-A20697603	10um	24	16129995	thiostrepton	232	223
BRD-K42142750	10um	6	5281743	retrorsine	231	194
BRD-A80928489	10um	6	14900	1-monopalmitin	230	180
BRD-A33746814	0.629999995232um	6	73707604	avicin-g	230	221
BRD-K18135438	10um	6	10133	chenodeoxycholic-acid	230	227
BRD-K61269089	10um	24	5280569	daphnetin	230	181
BRD-K41170226	10um	6	23679071	deoxycholic-acid	230	217
BRD-A71390734	0.0130000002682um	24	42594	idarubicin	230	229
BRD-K07117950	10um	6	10212	imperatorin	230	229
BRD-K78126613	0.00449999980628um	24	4055	menadione	230	187
BRD-K67102207	10um	6	4775	phenylbutyrate	230	215
BRD-K32696739	10um	24	107838	noreleagnine	229	212
BRD-K15567136	10um	6	6084	papaverine	229	218
BRD-K17953061	10um	6	44259	staurosporine	229	224
BRD-K33572481	10um	6	2733768	taurodeoxycholic-acid	229	192
BRD-K36452089	3.70000004768um	24	16043	tert-butylhydroquinone	229	194
BRD-A29731977	10um	24	5702072	17-hydroxyprogesterone-caproate	228	211
BRD-K85853281	10um	24	151582	BRD-K85853281	228	193
BRD-K86191271	10um	6	10687292	cytosporone-b	228	161
BRD-K42095107	10um	24	5281708	daidzein	228	215
BRD-K43389675	10um	24	30323	daunorubicin	228	215
BRD-A52530684	0.0399999991059um	24	6916127	doxorubicin	228	207
BRD-A19500257	0.0399999991059um	24	13017911	geldanamycin	228	183
BRD-A17535965	10um	24	23817963	gelsemine	228	189
BRD-K68144790	10um	24	3035026	glycodeoxycholic-acid	228	194
BRD-K98493452	10um	6	72303	honokiol	228	213
BRD-A71390734	0.00150000001304um	24	42594	idarubicin	228	189
BRD-A52650764	0.370400011539um	24	5225086	ingenol	228	197
BRD-K15567136	10um	24	6084	papaverine	228	179
BRD-K38251852	10um	24	105008	paxilline	228	177
BRD-K36452089	1.23000001907um	24	16043	tert-butylhydroquinone	228	185
BRD-A52886023	10um	24	16218979	antimycin-a	227	208
BRD-A33746814	2.5um	6	73707604	avicin-g	227	188
BRD-A30395175	10um	24	4014619	BRD-A30395175	227	196
BRD-A91699651	0.00150000001304um	24	2719	chloroquine	227	190
BRD-K18910433	0.0412000007927um	24	5757	estradiol	227	206
BRD-K33583600	10um	24	638278	isoliquiritigenin	227	206
BRD-K05350981	10um	6	5281901	oligomycin-c	227	188
BRD-K92870997	10um	6	5281727	pterostilbene	227	184
BRD-K62609077	10um	6	439654	scoulerine	227	214
BRD-A85860691	3.32999992371um	24	161591	chaetocin	226	189
BRD-A76941896	10um	24	1691	doxorubicin	226	195
BRD-K85985071	10um	6	3213	ellipticine	226	231
BRD-K06792661	10um	24	72376	narciclasine	226	237
BRD-K84175871	10um	24	7028	pseudoephedrine	226	201
BRD-A58955223	1.1111um	6	5350	sulforaphane	226	235
BRD-A58955223	3.3333um	6	5350	sulforaphane	226	235
BRD-K40902647	10um	6	15376	vincamine	226	209
BRD-K16336526	10um	6	1548942	capsaicin	225	202
BRD-A71459254	10um	6	6708764	cymarin	225	228
BRD-A64125466	10um	24	6602440	dehydrocholic-acid	225	194
BRD-A76941896	10um	6	1691	doxorubicin	225	208
BRD-K40758068	10um	6	64139	efavirenz	225	198
BRD-A25687296	10um	24	5702048	emetine	225	228
BRD-A18620900	10um	24	5317223	estriol	225	198
BRD-K49481516	10um	6	9651	galantamine	225	192
BRD-K93754473	28.39um	24	2733526	tamoxifen	225	216
BRD-K93754473	10um	6	2733526	tamoxifen	225	202
BRD-A61856038	10um	6	442544	tremulacin	225	152
BRD-A29731977	10um	6	5702072	17-hydroxyprogesterone-caproate	224	209
BRD-A33746814	0.159999996424um	6	73707604	avicin-g	224	189
BRD-A09495397	10um	6	6710622	bicuculline	224	237
BRD-A18917088	10um	24	5317221	estradiol	224	241
BRD-A36066264	10um	24	3262	estradiol-benzoate	224	207
BRD-K38903228	10um	6	10621	hesperidin	224	213
BRD-K91733562	10um	6	65373	secoisolariciresinol	224	203
BRD-A04327189	10um	6	7172	synephrine	224	179
BRD-K36452089	11.1099996567um	24	16043	tert-butylhydroquinone	224	183
BRD-K90553655	10um	6	5995	testosterone	224	201
BRD-K51350053	10um	24	3005572	toremifene	224	219
BRD-A52193669	10um	6	73707417	withaferin-a	224	243
BRD-K36638830	10um	24	641266	anabasine	223	198
BRD-A33746814	10um	24	73707604	avicin-g	223	232
BRD-K25905511	10um	24	6708769	buddleoflavonoloside	223	178
BRD-K36055864	10um	24	6197	cycloheximide	223	238
BRD-K45330754	3.32999992371um	24	448537	diethylstilbestrol	223	162
BRD-K85985071	10um	24	3213	ellipticine	223	240
BRD-A88080608	10um	6	3247	equilin	223	212
BRD-K17016787	3.32999992371um	24	5756	estriol	223	178
BRD-K24656285	10um	6	445070	farnesol	223	218
BRD-K37691127	10um	24	3611	hinokitiol	223	237
BRD-A71390734	0.00150000001304um	6	42594	idarubicin	223	206
BRD-K92138166	10um	6	5748555	mammea-a	223	220
BRD-A03323675	10um	6	5076	ritonavir	223	172
BRD-K19284129	10um	24	128563	salvinorin-a	223	178
BRD-A68318914	10um	6	69216	5-methylhydantoin	222	173
BRD-K86191271	10um	24	10687292	cytosporone-b	222	221
BRD-K04046242	1.11000001431um	24	223368	equilin	222	175
BRD-K18910433	0.119999997318um	24	5757	estradiol	222	185
BRD-K77830450	10um	24	6610344	forskolin	222	203
BRD-A71390734	3.32999992371um	24	42594	idarubicin	222	215
BRD-K91301684	10um	6	31411	noscapine	222	211
BRD-K39944607	10um	24	442530	ochratoxin-a	222	253
BRD-K63343048	10um	24	3034010	orlistat	222	221
BRD-K95921201	10um	24	5770	reserpine	222	201
BRD-K34330170	10um	24	6708539	rotenonic-acid	222	229
BRD-K39256324	10um	24	5281847	rottlerin	222	205
BRD-K36452089	0.629999995232um	6	16043	tert-butylhydroquinone	222	205
BRD-A51182606	10um	6	298	chloramphenicol	221	212
BRD-K92093830	0.123400002718um	6	443939	doxorubicin	221	192
BRD-K04046242	10um	6	223368	equilin	221	186
BRD-K74212935	10um	24	134551	ergocryptine	221	184
BRD-A02367930	10um	24	24707	ethinyl-estradiol	221	192
BRD-K09602097	10um	24	47936	forskolin	221	242
BRD-A06390036	10um	24	45479756	hydroquinidine	221	188
BRD-K74117820	10um	6	64142	nelfinavir	221	200
BRD-K70799801	10um	24	441074	quinidine	221	226
BRD-K84595254	10um	24	6185	strophanthidin	221	238
BRD-A58955223	0.119999997318um	24	5350	sulforaphane	221	184
BRD-A19037878	0.370000004768um	24	6376322	trichostatin-a	221	188
BRD-K49061529	10um	24	105078	BRD-K49061529	220	209
BRD-K59946561	10um	6	9305	BRD-K59946561	220	219
BRD-A71459254	10um	24	6708764	cymarin	220	231
BRD-A68009927	0.00449999980628um	24	3085107	daunorubicin	220	181
BRD-K96144918	10um	6	5312531	mead-acid	220	193
BRD-K06792661	0.0130000002682um	24	72376	narciclasine	220	203
BRD-K39944607	10um	6	442530	ochratoxin-a	220	213
BRD-K92760278	10um	6	493570	riboflavin	220	207
BRD-K62609077	10um	24	439654	scoulerine	220	213
BRD-K93754473	1.11000001431um	24	2733526	tamoxifen	220	177
BRD-K04412738	10um	6	33741	tramadol	220	173
BRD-K68202742	0.0412000007927um	24	444732	trichostatin-a	220	203
BRD-A15914070	10um	6	5283344	4-hydroxy-2-nonenal	219	196
BRD-A98888159	10um	6	14205635	BRD-A98888159	219	222
BRD-K18910433	0.12349999696um	24	5757	estradiol	219	184
BRD-K47192521	10um	24	446284	icosapent	219	194
BRD-A52650764	10um	24	5225086	ingenol	219	210
BRD-K32696739	10um	6	107838	noreleagnine	219	196
BRD-K91509126	10um	6	4813	piceatannol	219	242
BRD-A67479912	10um	6	5320716	progesterone	219	202
BRD-K03816923	10um	6	5281847	rottlerin	219	226
BRD-A34907681	10um	6	5293655	rutin	219	210
BRD-K54790157	10um	6	5585	trioxsalen	219	183
BRD-A51410489	10um	6	2866	yohimbine	219	226
BRD-A80928489	10um	24	14900	1-monopalmitin	218	235
BRD-K46836114	10um	24	182362	BRD-K46836114	218	227
BRD-A91699651	1.11000001431um	24	2719	chloroquine	218	181
BRD-A68009927	0.0412000007927um	24	3085107	daunorubicin	218	203
BRD-A52530684	10um	24	6916127	doxorubicin	218	221
BRD-A36066264	10um	6	3262	estradiol-benzoate	218	203
BRD-K76674262	3.32999992371um	6	285033	homoharringtonine	218	219
BRD-A71390734	0.370400011539um	24	42594	idarubicin	218	191
BRD-A52650764	10um	6	5225086	ingenol	218	217
BRD-K56700933	10um	24	16741	phenethyl-isothiocyanate	218	167
BRD-K21733600	10um	6	5090	rofecoxib	218	175
BRD-K81062487	10um	24	23687511	taurocholic-acid	218	187
BRD-K36452089	33.3300018311um	24	16043	tert-butylhydroquinone	218	203
BRD-A16444946	10um	6	41774	acarbose	217	166
BRD-A15100685	0.629999995232um	6	73707595	avicin-d	217	188
BRD-A33746814	2.5um	24	73707604	avicin-g	217	238
BRD-K74212935	10um	6	134551	ergocryptine	217	178
BRD-A07824748	10um	6	10251	flavanone	217	222
BRD-K54771420	10um	24	10140	glycocholic-acid	217	212
BRD-A72711497	10um	6	6708465	lasalocid	217	202
BRD-K48692744	0.666700005531um	24	63306	NU-1025	217	218
BRD-K78294846	10um	6	10228	osthol	217	206
BRD-K82865713	10um	6	5280881	prostaglandin-b2	217	214
BRD-K93754473	0.119999997318um	24	2733526	tamoxifen	217	178
BRD-A19037878	3.32999992371um	24	6376322	trichostatin-a	217	200
BRD-A91699651	0.0412000007927um	24	2719	chloroquine	216	175
BRD-K04046242	0.370000004768um	24	223368	equilin	216	171
BRD-K18910433	0.370400011539um	24	5757	estradiol	216	237
BRD-K68144790	10um	6	3035026	glycodeoxycholic-acid	216	195
BRD-K69650333	10um	24	636362	idarubicin	216	219
BRD-K78126613	0.12349999696um	6	4055	menadione	216	199
BRD-A46747628	10um	24	4605	ouabain	216	243
BRD-K20482099	10um	6	5280805	rutin	216	195
BRD-K10466330	0.119999997318um	24	11719255	AVA	215	178
BRD-K43468059	10um	6	164723	byssochlamic-acid	215	228
BRD-A20589515	10um	24	108001	dihydroxyphenylglycine	215	200
BRD-K39965020	10um	6	445580	doconexent	215	196
BRD-K03067624	10um	24	10219	emetine	215	212
BRD-K04046242	3.32999992371um	24	223368	equilin	215	164
BRD-A49734948	10um	6	2837663	foliosidine	215	198
BRD-A19500257	0.370000004768um	24	13017911	geldanamycin	215	186
BRD-A71390734	0.00449999980628um	24	42594	idarubicin	215	230
BRD-K06792661	0.00449999980628um	6	72376	narciclasine	215	178
BRD-A24543851	10um	6	412	nornicotine	215	164
BRD-K14536225	10um	6	5316606	piceid	215	174
BRD-K84595254	10um	6	6185	strophanthidin	215	252
BRD-K97951054	10um	24	5281657	BRD-K97951054	214	203
BRD-A68009927	0.370400011539um	24	3085107	daunorubicin	214	201
BRD-K45330754	1.11000001431um	24	448537	diethylstilbestrol	214	155
BRD-K92093830	3.32999992371um	24	443939	doxorubicin	214	201
BRD-K04046242	0.0399999991059um	24	223368	equilin	214	171
BRD-K81839095	0.119999997318um	24	5870	estrone	214	181
BRD-K26117720	10um	6	442793	gingerol	214	209
BRD-K76674262	10um	6	285033	homoharringtonine	214	219
BRD-K40530731	10um	24	154417	hyoscyamine	214	180
BRD-K91145395	10um	24	454217	prostratin	214	225
BRD-A52805806	10um	6	6708512	totaralolal	214	209
BRD-A19037878	2.5um	24	6376322	trichostatin-a	214	191
BRD-K59574735	10um	6	72172	ubenimex	214	211
BRD-K73700643	10um	24	70547	BRD-K73700643	213	180
BRD-K08287586	10um	24	7184	butylparaben	213	232
BRD-K80348542	10um	24	442195	cephaeline	213	214
BRD-K45330754	0.370000004768um	24	448537	diethylstilbestrol	213	186
BRD-K45330754	0.119999997318um	24	448537	diethylstilbestrol	213	168
BRD-K45330754	0.0399999991059um	24	448537	diethylstilbestrol	213	166
BRD-K17016787	1.11000001431um	24	5756	estriol	213	170
BRD-K67783091	10um	6	3559	haloperidol	213	202
BRD-K40619305	10um	6	8369	larixinic-acid	213	174
BRD-A72711497	10um	24	6708465	lasalocid	213	218
BRD-K64044582	10um	24	6435901	linoleamide	213	208
BRD-A37052580	10um	6	16212981	physostigmine	213	188
BRD-K26241953	10um	24	4813	piceatannol	213	190
BRD-A19037878	0.159999996424um	6	6376322	trichostatin-a	213	212
BRD-A19037878	0.0399999991059um	24	6376322	trichostatin-a	213	204
BRD-K88378636	0.00449999980628um	24	265237	withaferin-a	213	192
BRD-K76133116	10um	6	2724127	benzydamine	212	185
BRD-K43389675	10um	6	30323	daunorubicin	212	233
BRD-K32744045	10um	6	3117	disulfiram	212	215
BRD-A35033682	10um	6	11095	eriodictyol	212	193
BRD-K63550407	10um	24	12560	erythromycin	212	233
BRD-K76674262	3.32999992371um	24	285033	homoharringtonine	212	205
BRD-K31542390	10um	24	671222	mycophenolic-acid	212	213
BRD-K68095457	10um	6	4671	palmitoylethanolamide	212	229
BRD-K03842655	10um	6	6610243	penitrem-a	212	229
BRD-A45333398	10um	24	6708762	periplocymarin	212	201
BRD-A58955223	0.0015um	6	5350	sulforaphane	212	195
BRD-K95808480	10um	6	712318	taxifolin	212	211
BRD-K91370081	10um	24	253602	anisomycin	211	240
BRD-K10466330	10um	24	11719255	AVA	211	186
BRD-A68009927	10um	6	3085107	daunorubicin	211	188
BRD-A25687296	10um	6	5702048	emetine	211	236
BRD-K18910433	0.0130000002682um	24	5757	estradiol	211	202
BRD-A91452556	10um	6	5702051	estradiol-cypionate	211	232
BRD-K66944906	10um	6	3083928	fraxidin	211	240
BRD-K78126613	10um	6	4055	menadione	211	184
BRD-A87719232	10um	24	1302	naproxen	211	188
BRD-K13927029	10um	6	9904001	retinol	211	218
BRD-K51485625	10um	6	392622	ritonavir	211	210
BRD-K99595596	10um	6	6419979	salsolinol	211	226
BRD-A58955223	0.0412um	6	5350	sulforaphane	211	228
BRD-K93754473	0.370000004768um	24	2733526	tamoxifen	211	196
BRD-K73999723	10um	6	65999	telmisartan	211	190
BRD-A19037878	1.11000001431um	24	6376322	trichostatin-a	211	194
BRD-K91370081	10um	6	253602	anisomycin	210	217
BRD-A49358627	10um	6	2763	ciprofibrate	210	197
BRD-A52530684	10um	6	6916127	doxorubicin	210	217
BRD-A52530684	1.11000001431um	24	6916127	doxorubicin	210	179
BRD-K18910433	3.32999992371um	24	5757	estradiol	210	183
BRD-K46068882	10um	24	5036604	eugenitol	210	187
BRD-K76674262	0.370400011539um	24	285033	homoharringtonine	210	195
BRD-K05906022	10um	6	179651	limonin	210	206
BRD-K20986251	10um	6	9903	lithocholic-acid	210	219
BRD-K78126613	0.370400011539um	24	4055	menadione	210	189
BRD-K88741031	10um	6	5353609	methyl-2,5-dihydroxycinnamate	210	179
BRD-K06792661	1.11000001431um	6	72376	narciclasine	210	229
BRD-A46747628	10um	6	4605	ouabain	210	225
BRD-K65331431	10um	24	638034	retinyl	210	227
BRD-A81772229	10um	24	4677798	simvastatin	210	195
BRD-K84036904	10um	6	6010	testosterone	210	175
BRD-A19037878	2.5um	6	6376322	trichostatin-a	210	205
BRD-K03067624	10um	6	10219	emetine	209	198
BRD-K85090592	10um	6	5909	pilocarpine	209	180
BRD-A48430263	10um	6	60560	pioglitazone	209	198
BRD-K89923877	10um	24	23581798	scopolamine	209	132
BRD-K11905747	10um	6	24747691	spectinomycin	209	212
BRD-K69608737	10um	24	445643	tacrolimus	209	228
BRD-K30197592	10um	6	1833	5-methoxytryptamine	208	209
BRD-K30197592	10um	24	1833	5-methoxytryptamine	208	187
BRD-A67373739	10um	6	200	AICA-ribonucleotide	208	227
BRD-K49448285	10um	6	2399	bisindolylmaleimide	208	215
BRD-K65411918	10um	24	92859	BRD-K65411918	208	190
BRD-K63606607	10um	24	9547215	bufalin	208	245
BRD-A62184259	10um	6	2900	cycloheximide	208	251
BRD-K42095107	10um	6	5281708	daidzein	208	209
BRD-A68009927	0.00150000001304um	24	3085107	daunorubicin	208	191
BRD-K18910433	3.33330011368um	6	5757	estradiol	208	217
BRD-A39747742	10um	24	163332	estradiol-valerate	208	207
BRD-K46068882	10um	6	5036604	eugenitol	208	234
BRD-K76674262	0.0412000007927um	6	285033	homoharringtonine	208	203
BRD-K59570838	10um	24	8421	homoveratrylamine	208	191
BRD-K78126613	10um	24	4055	menadione	208	191
BRD-K74133369	10um	24	73707429	oligomycin-a	208	213
BRD-K34330170	10um	6	6708539	rotenonic-acid	208	213
BRD-K36452089	2.5um	6	16043	tert-butylhydroquinone	208	209
BRD-A01826957	10um	6	9912	xanthinol	208	157
BRD-K53523901	10um	24	64981	arctigenin	207	202
BRD-K17497770	10um	24	5281222	butein	207	172
BRD-A91699651	0.0130000002682um	24	2719	chloroquine	207	176
BRD-A39747742	10um	6	163332	estradiol-valerate	207	226
BRD-K81839095	3.32999992371um	24	5870	estrone	207	176
BRD-K76674262	1.11000001431um	6	285033	homoharringtonine	207	214
BRD-K76674262	1.11000001431um	24	285033	homoharringtonine	207	212
BRD-K09497549	10um	6	5281565	kawain	207	208
BRD-K06792661	3.33330011368um	6	72376	narciclasine	207	214
BRD-K06792661	0.0412000007927um	24	72376	narciclasine	207	156
BRD-K59522102	10um	6	638024	piperine	207	190
BRD-A31800922	10um	6	207841	procyclidine	207	220
BRD-K13927029	10um	24	9904001	retinol	207	232
BRD-A08003242	10um	24	3270699	rhodomyrtoxin-b	207	224
BRD-A58955223	0.159999996424um	6	5350	sulforaphane	207	192
BRD-K94649603	10um	6	439533	taxifolin	207	206
BRD-A79479878	10um	6	5408	testosterone	207	184
BRD-K45988865	10um	6	5354004	tetramethylsilane	207	190
BRD-A51410489	10um	24	2866	yohimbine	207	184
BRD-K55191674	10um	24	5904	benzylpenicillin	206	177
BRD-K89210380	10um	24	171548	biotin	206	175
BRD-K46836114	10um	6	182362	BRD-K46836114	206	205
BRD-K85853281	10um	6	151582	BRD-K85853281	206	211
BRD-K68077509	10um	24	442021	brucine	206	172
BRD-A91699651	0.00150000001304um	6	2719	chloroquine	206	175
BRD-A68009927	3.32999992371um	24	3085107	daunorubicin	206	179
BRD-A64125466	10um	6	6602440	dehydrocholic-acid	206	211
BRD-K01624546	10um	6	5312557	docosatrienoic-acid	206	179
BRD-K92093830	0.123400002718um	24	443939	doxorubicin	206	237
BRD-K92093830	0.00449999980628um	24	443939	doxorubicin	206	213
BRD-K50660797	10um	24	107905	epicatechin	206	207
BRD-K18910433	0.00449999980628um	6	5757	estradiol	206	205
BRD-K94441233	10um	6	64715	mevastatin	206	207
BRD-K84175871	10um	6	7028	pseudoephedrine	206	170
BRD-A58955223	1.11000001431um	24	5350	sulforaphane	206	171
BRD-K25186396	10um	24	68077	tangeritin	206	232
BRD-A19037878	10um	24	6376322	trichostatin-a	206	207
BRD-K88378636	0.00150000001304um	6	265237	withaferin-a	206	183
BRD-K73700643	10um	6	70547	BRD-K73700643	205	174
BRD-K41170226	10um	24	23679071	deoxycholic-acid	205	230
BRD-K92093830	0.0412000007927um	24	443939	doxorubicin	205	182
BRD-A52530684	0.370000004768um	24	6916127	doxorubicin	205	176
BRD-K55591206	10um	6	65064	epigallocatechin	205	216
BRD-K04046242	0.119999997318um	24	223368	equilin	205	162
BRD-K18910433	0.0412000007927um	6	5757	estradiol	205	184
BRD-A49148672	10um	24	24746891	galantamine	205	188
BRD-K37691127	10um	6	3611	hinokitiol	205	210
BRD-A71390734	0.123400002718um	24	42594	idarubicin	205	190
BRD-K10207760	10um	24	6426773	lasalocid	205	221
BRD-K06792661	3.33330011368um	24	72376	narciclasine	205	240
BRD-K64994968	10um	6	5994	progesterone	205	208
BRD-A58955223	0.3704um	6	5350	sulforaphane	205	206
BRD-K24994810	10um	24	101989	androstenol	204	195
BRD-K10466330	3.32999992371um	24	11719255	AVA	204	193
BRD-K92093830	0.370400011539um	24	443939	doxorubicin	204	209
BRD-K92093830	1.11000001431um	24	443939	doxorubicin	204	203
BRD-A88080608	10um	24	3247	equilin	204	199
BRD-K18910433	0.0399999991059um	24	5757	estradiol	204	187
BRD-K17016787	0.0399999991059um	24	5756	estriol	204	157
BRD-K18059238	10um	6	5280933	gamma-linolenic-acid	204	199
BRD-A52650764	0.0412000007927um	6	5225086	ingenol	204	177
BRD-K06792661	0.370400011539um	6	72376	narciclasine	204	197
BRD-A14566392	10um	6	2837667	scopolamine	204	233
BRD-K88378636	0.0412000007927um	24	265237	withaferin-a	204	189
BRD-A15100685	2.5um	6	73707595	avicin-d	203	172
BRD-K49061529	10um	6	105078	BRD-K49061529	203	196
BRD-K63606607	10um	6	9547215	bufalin	203	230
BRD-K45330754	10um	24	448537	diethylstilbestrol	203	186
BRD-K92093830	0.0130000002682um	24	443939	doxorubicin	203	188
BRD-A07824748	10um	24	10251	flavanone	203	178
BRD-A59808129	10um	6	73707425	guggulsterone	203	176
BRD-K06792661	10um	6	72376	narciclasine	203	216
BRD-K68095457	10um	24	4671	palmitoylethanolamide	203	212
BRD-A58955223	0.0399999991059um	24	5350	sulforaphane	203	172
BRD-A19037878	0.370370000601um	24	6376322	trichostatin-a	203	224
BRD-K45401373	10um	24	64971	betulinic-acid	202	199
BRD-K89210380	10um	6	171548	biotin	202	193
BRD-K59946561	10um	24	9305	BRD-K59946561	202	221
BRD-K65411918	10um	6	92859	BRD-K65411918	202	203
BRD-K36055864	10um	6	6197	cycloheximide	202	227
BRD-K92093830	3.32999992371um	6	443939	doxorubicin	202	173
BRD-K81839095	1.11000001431um	24	5870	estrone	202	163
BRD-A65550283	10um	24	100018	ginsenoside	202	195
BRD-K09497549	10um	24	5281565	kawain	202	207
BRD-K27871032	10um	24	14987	lysergol	202	167
BRD-A37867643	10um	6	97807	safrolglycol	202	211
BRD-A43940795	10um	6	6602555	tetrahydropalmatine	202	223
BRD-K68202742	3.32999992371um	24	444732	trichostatin-a	202	219
BRD-K84924563	40um	24	73707377	BRD-K84924563	201	196
BRD-K80348542	10um	6	442195	cephaeline	201	210
BRD-K32828673	10um	24	197810	chelidonine	201	170
BRD-A68009927	0.12349999696um	6	3085107	daunorubicin	201	182
BRD-K90976994	10um	6	6674	dehydrocholic-acid	201	168
BRD-K98521173	10um	6	6166	desoxycortone	201	192
BRD-K92093830	1.11000001431um	6	443939	doxorubicin	201	196
BRD-K63913457	10um	6	5312529	eicosatrienoic-acid	201	194
BRD-K94841585	10um	24	361510	emodic-acid	201	194
BRD-A91452556	10um	24	5702051	estradiol-cypionate	201	212
BRD-A71390734	1.11000001431um	6	42594	idarubicin	201	202
BRD-A52650764	3.32999992371um	24	5225086	ingenol	201	210
BRD-K78126613	3.32999992371um	24	4055	menadione	201	210
BRD-K03816923	9.68um	24	5281847	rottlerin	201	226
BRD-K84996949	10um	24	145659	sinensetin	201	148
BRD-K68202742	10um	24	444732	trichostatin-a	201	216
BRD-A96820077	10um	24	23760135	ungerine	201	174
BRD-A15100685	0.629999995232um	24	73707595	avicin-d	200	217
BRD-K03440695	10um	6	10154	boldine	200	168
BRD-K18059238	10um	24	5280933	gamma-linolenic-acid	200	193
BRD-A71390734	0.123400002718um	6	42594	idarubicin	200	159
BRD-A52650764	1.11000001431um	6	5225086	ingenol	200	223
BRD-K96119599	10um	24	167683	leucodin	200	203
BRD-K06792661	1.11000001431um	24	72376	narciclasine	200	221
BRD-K66043364	10um	6	262535	noscapine	200	226
BRD-A43150328	10um	6	4728	penicillic-acid	200	169
BRD-K64614248	10um	6	439503	salicin	200	199
BRD-K93754473	3.32999992371um	24	2733526	tamoxifen	200	197
BRD-K10466330	1.11000001431um	24	11719255	AVA	199	176
BRD-A15100685	2.5um	24	73707595	avicin-d	199	200
BRD-A85860691	0.370400011539um	24	161591	chaetocin	199	202
BRD-K13533483	10um	24	5284373	cyclosporin-a	199	202
BRD-A68009927	0.12349999696um	24	3085107	daunorubicin	199	216
BRD-A68009927	1.11000001431um	24	3085107	daunorubicin	199	194
BRD-A88282067	10um	24	441724	delcorine	199	152
BRD-A99177642	10um	6	5460428	deltaline	199	202
BRD-K81839095	0.370000004768um	24	5870	estrone	199	168
BRD-K87049188	10um	6	3442	fusaric-acid	199	188
BRD-K92726801	10um	24	3397945	hydrastinine	199	226
BRD-A71390734	0.0412000007927um	24	42594	idarubicin	199	216
BRD-K92760278	10um	24	493570	riboflavin	199	198
BRD-K20313525	10um	6	5281792	rosmarinic-acid	199	180
BRD-K03816923	10um	24	5281847	rottlerin	199	234
BRD-K51350053	10um	6	3005572	toremifene	199	164
BRD-A19037878	0.159999996424um	24	6376322	trichostatin-a	199	230
BRD-K85013741	10um	24	1550607	auraptene	198	197
BRD-A85860691	10um	6	161591	chaetocin	198	173
BRD-A85860691	0.123400002718um	24	161591	chaetocin	198	167
BRD-K96271548	10um	6	1622530	coumaric-acid	198	185
BRD-A20589515	10um	6	108001	dihydroxyphenylglycine	198	211
BRD-K38903228	10um	24	10621	hesperidin	198	167
BRD-K76674262	0.370400011539um	6	285033	homoharringtonine	198	209
BRD-A78295502	10um	6	2734756	hydroquinine	198	221
BRD-A78303415	10um	24	5318386	hyoscyamine	198	187
BRD-A52650764	3.32999992371um	6	5225086	ingenol	198	229
BRD-K78126613	0.0130000002682um	24	4055	menadione	198	189
BRD-K48692744	0.00089999998454um	24	63306	NU-1025	198	217
BRD-K48692744	10um	24	63306	NU-1025	198	195
BRD-A64479082	10um	6	11068	quinidine	198	179
BRD-A54236247	10um	6	5032	racephedrine	198	201
BRD-A58955223	3.32999992371um	24	5350	sulforaphane	198	171
BRD-A43940795	10um	24	6602555	tetrahydropalmatine	198	159
BRD-A61856038	10um	24	442544	tremulacin	198	207
BRD-A19037878	0.629999995232um	6	6376322	trichostatin-a	198	215
BRD-A72758037	10um	24	5320556	asiatic-acid	197	190
BRD-A66199457	10um	6	23874513	asiaticoside	197	198
BRD-K45401373	10um	6	64971	betulinic-acid	197	180
BRD-A62184259	10um	24	2900	cycloheximide	197	230
BRD-K18910433	10um	24	5757	estradiol	197	186
BRD-A19500257	0.00150000001304um	24	13017911	geldanamycin	197	184
BRD-K54771420	10um	6	10140	glycocholic-acid	197	191
BRD-K27871032	10um	6	14987	lysergol	197	198
BRD-K06792661	0.0412000007927um	6	72376	narciclasine	197	164
BRD-A44448661	10um	24	4737	pentobarbital	197	202
BRD-A58955223	2.5um	6	5350	sulforaphane	197	176
BRD-K68202742	0.370400011539um	24	444732	trichostatin-a	197	232
BRD-K88378636	0.00150000001304um	24	265237	withaferin-a	197	192
BRD-K50384076	10um	24	5282073	7,4'-dihydroxyflavone	196	207
BRD-K53523901	10um	6	64981	arctigenin	196	198
BRD-A85860691	0.00449999980628um	24	161591	chaetocin	196	183
BRD-K92093830	0.0412000007927um	6	443939	doxorubicin	196	173
BRD-K18910433	3.33330011368um	24	5757	estradiol	196	221
BRD-K18910433	0.12349999696um	6	5757	estradiol	196	213
BRD-A71203467	10um	6	5290	l-stepholidine	196	193
BRD-A24817035	10um	6	15548	laudanosine	196	179
BRD-K82865713	10um	24	5280881	prostaglandin-b2	196	191
BRD-A58955223	0.370000004768um	24	5350	sulforaphane	196	163
BRD-K93754473	28.39um	6	2733526	tamoxifen	196	211
BRD-K69023402	10um	24	446378	thapsigargin	196	217
BRD-A72758037	10um	6	5320556	asiatic-acid	195	168
BRD-K13533483	10um	6	5284373	cyclosporin-a	195	248
BRD-A52530684	3.32999992371um	24	6916127	doxorubicin	195	174
BRD-K48935217	10um	6	448013	epothilone	195	214
BRD-A35033682	10um	24	11095	eriodictyol	195	210
BRD-K59570838	10um	6	8421	homoveratrylamine	195	174
BRD-A71390734	0.00449999980628um	6	42594	idarubicin	195	212
BRD-A52650764	0.12349999696um	24	5225086	ingenol	195	160
BRD-K08973992	10um	6	5280450	linoleic-acid	195	188
BRD-K48692744	0.00820000004023um	24	63306	NU-1025	195	170
BRD-K38323065	10um	6	4754	phenacetin	195	186
BRD-K26241953	10um	6	4813	piceatannol	195	182
BRD-K64614248	10um	24	439503	salicin	195	170
BRD-A19037878	0.119999997318um	24	6376322	trichostatin-a	195	206
BRD-A19037878	1.111109972um	24	6376322	trichostatin-a	195	196
BRD-K88378636	3.32999992371um	24	265237	withaferin-a	195	214
BRD-A95696820	10um	6	16667722	acadesine	194	197
BRD-K08287586	10um	6	7184	butylparaben	194	213
BRD-K90976994	10um	24	6674	dehydrocholic-acid	194	163
BRD-A75144621	10um	6	30322	digoxin	194	224
BRD-K92093830	0.00150000001304um	24	443939	doxorubicin	194	187
BRD-A04308630	10um	6	23340	genipin	194	207
BRD-K76674262	0.12349999696um	6	285033	homoharringtonine	194	203
BRD-A52650764	1.11000001431um	24	5225086	ingenol	194	207
BRD-K23583188	10um	24	3894	lavendustin-a	194	161
BRD-K77641333	10um	24	11079	naphazoline	194	199
BRD-K76600340	10um	24	7510	nicotinyl-alcohol-tartrate	194	184
BRD-K56450366	10um	24	5281894	NSC-94258	194	173
BRD-K48692744	0.00270000007004um	24	63306	NU-1025	194	179
BRD-K48692744	2um	24	63306	NU-1025	194	169
BRD-A43150328	10um	24	4728	penicillic-acid	194	195
BRD-K22009844	10um	6	4770	phenprobamate	194	189
BRD-K70799801	10um	6	441074	quinidine	194	181
BRD-K36452089	2.5um	24	16043	tert-butylhydroquinone	194	155
BRD-K97799481	10um	6	2153	theophylline	194	227
BRD-K68202742	0.00150000001304um	24	444732	trichostatin-a	194	215
BRD-K68202742	1.11000001431um	24	444732	trichostatin-a	194	207
BRD-K88378636	10um	24	265237	withaferin-a	194	213
BRD-K72726508	10um	24	5327723	arcyriaflavin-a	193	188
BRD-K17016787	10um	24	5756	estriol	193	182
BRD-K81839095	0.0399999991059um	24	5870	estrone	193	146
BRD-A19500257	0.0412000007927um	24	13017911	geldanamycin	193	194
BRD-A17535965	10um	6	23817963	gelsemine	193	210
BRD-A08709697	10um	24	23930397	heliotrine	193	162
BRD-K51418664	10um	6	15560563	mitomycin-c	193	204
BRD-K35708212	10um	6	439501	ouabain	193	229
BRD-K38251852	10um	6	105008	paxilline	193	200
BRD-A55815733	10um	6	5280483	phylloquinone	193	220
BRD-K14536225	10um	24	5316606	piceid	193	152
BRD-K60511616	10um	6	54687	pravastatin	193	190
BRD-A19037878	3.333329916um	24	6376322	trichostatin-a	193	218
BRD-K40227168	10um	24	71203	vinburnine	193	202
BRD-A66199457	10um	24	23874513	asiaticoside	192	179
BRD-A09495397	10um	24	6710622	bicuculline	192	207
BRD-K73589401	10um	24	5753	corticosterone	192	193
BRD-K97440753	10um	24	444034	dihydroergocristine	192	179
BRD-K92093830	10um	6	443939	doxorubicin	192	191
BRD-K35573744	10um	6	5353609	erbstatin-analog	192	217
BRD-K18910433	0.00150000001304um	6	5757	estradiol	192	205
BRD-K51095933	10um	6	23674502	estropipate	192	189
BRD-A71390734	0.0130000002682um	6	42594	idarubicin	192	205
BRD-K37080523	10um	24	5701996	isoreserpine	192	193
BRD-K96119599	10um	6	167683	leucodin	192	203
BRD-K02953697	10um	6	442428	naringin	192	203
BRD-K48692744	0.0741000026464um	6	63306	NU-1025	192	167
BRD-K36007650	10um	6	23618032	puromycin	192	227
BRD-K37206356	10um	24	5281691	rhamnetin	192	179
BRD-A04327189	10um	24	7172	synephrine	192	159
BRD-K68202742	0.0412000007927um	6	444732	trichostatin-a	192	227
BRD-K68202742	3.32999992371um	6	444732	trichostatin-a	192	205
BRD-K88378636	10um	6	265237	withaferin-a	192	223
BRD-K44276885	10um	6	444254	acarbose	191	226
BRD-A85860691	0.123400002718um	6	161591	chaetocin	191	192
BRD-A99571536	10um	6	442897	dubinidine	191	172
BRD-K18910433	0.00150000001304um	24	5757	estradiol	191	174
BRD-K81839095	10um	24	5870	estrone	191	180
BRD-K76587808	10um	6	5273569	fraxetin	191	196
BRD-K76587808	10um	24	5273569	fraxetin	191	194
BRD-A59808129	10um	24	73707425	guggulsterone	191	196
BRD-K81209159	10um	6	10748	herniarin	191	200
BRD-K76674262	0.00449999980628um	6	285033	homoharringtonine	191	186
BRD-A73605923	10um	24	24069689	mocimycin	191	182
BRD-A10070317	10um	6	91536	propranolol	191	204
BRD-K51033547	10um	24	667511	tramadol	191	204
BRD-K43468059	10um	24	164723	byssochlamic-acid	190	187
BRD-K64935403	10um	24	73707410	ebelactone-b	190	185
BRD-K18910433	0.0130000002682um	6	5757	estradiol	190	189
BRD-A74500471	10um	24	3279	ethambutol	190	163
BRD-K92683369	10um	6	353825	graveoline	190	213
BRD-K40530731	10um	6	154417	hyoscyamine	190	211
BRD-A71390734	0.08um	6	42594	idarubicin	190	165
BRD-K96144918	10um	24	5312531	mead-acid	190	141
BRD-A73605923	10um	6	24069689	mocimycin	190	211
BRD-K05395900	10um	24	6708476	nicotine	190	171
BRD-K25591257	10um	24	445154	resveratrol	190	187
BRD-A97437073	80um	24	77999	rosiglitazone	190	223
BRD-A52805806	10um	24	6708512	totaralolal	190	219
BRD-K88378636	0.0130000002682um	24	265237	withaferin-a	190	161
BRD-A68009927	3.32999992371um	6	3085107	daunorubicin	189	188
BRD-K92093830	0.00150000001304um	6	443939	doxorubicin	189	208
BRD-A71390734	0.370400011539um	6	42594	idarubicin	189	150
BRD-A54445976	10um	6	441749	napelline	189	190
BRD-K16195444	10um	24	4636	oxymetazoline	189	226
BRD-K93754473	10um	24	2733526	tamoxifen	189	190
BRD-K68202742	10um	6	444732	trichostatin-a	189	216
BRD-K59574735	10um	24	72172	ubenimex	189	148
BRD-K84924563	40um	6	73707377	BRD-K84924563	188	219
BRD-A68009927	0.00150000001304um	6	3085107	daunorubicin	188	195
BRD-K23478508	10um	6	2724385	digoxin	188	227
BRD-K17894950	10um	6	5359405	indirubin	188	193
BRD-A08003242	10um	6	3270699	rhodomyrtoxin-b	188	225
BRD-K44094599	10um	24	6473866	tacrolimus	188	181
BRD-A19037878	0.629999995232um	24	6376322	trichostatin-a	188	205
BRD-K68202742	0.12349999696um	24	444732	trichostatin-a	188	201
BRD-K88378636	0.0412000007927um	6	265237	withaferin-a	188	151
BRD-K84709232	10um	6	5281787	caffeic-acid	187	172
BRD-K97509413	10um	6	5281707	coumestrol	187	188
BRD-K81209159	10um	24	10748	herniarin	187	188
BRD-K46424862	10um	24	5280567	hymecromone	187	178
BRD-A71203467	10um	24	5290	l-stepholidine	187	190
BRD-A24817035	10um	24	15548	laudanosine	187	154
BRD-K96319534	10um	6	70969	phentermine	187	236
BRD-K22429181	10um	6	445354	retinol	187	194
BRD-K99595596	10um	24	6419979	salsolinol	187	176
BRD-K45988865	10um	24	5354004	tetramethylsilane	187	214
BRD-K88378636	0.0130000002682um	6	265237	withaferin-a	187	172
BRD-K94144010	10um	6	854019	cotinine	186	227
BRD-A68009927	0.370400011539um	6	3085107	daunorubicin	186	167
BRD-A44448661	10um	6	4737	pentobarbital	186	211
BRD-K47869605	10um	6	10607	podophyllotoxin	186	219
BRD-K25591257	10um	6	445154	resveratrol	186	191
BRD-K69556541	10um	6	6610313	ryanodine	186	223
BRD-K89923877	10um	6	23581798	scopolamine	186	231
BRD-A85860691	0.0130000002682um	24	161591	chaetocin	185	178
BRD-A91699651	0.370400011539um	24	2719	chloroquine	185	184
BRD-A68009927	0.00449999980628um	6	3085107	daunorubicin	185	194
BRD-K92093830	0.00449999980628um	6	443939	doxorubicin	185	162
BRD-K18910433	0.370400011539um	6	5757	estradiol	185	180
BRD-A19500257	0.12349999696um	24	13017911	geldanamycin	185	178
BRD-A65767837	10um	24	5702068	hydrocortisone	185	200
BRD-A52650764	0.0130000002682um	6	5225086	ingenol	185	184
BRD-A19248578	10um	6	6436219	latrunculin-b	185	224
BRD-K20986251	10um	24	9903	lithocholic-acid	185	192
BRD-K63430059	10um	24	4114	methoxsalen	185	178
BRD-A60583491	10um	6	23789069	nitrarine	185	208
BRD-K48692744	0.0741000026464um	24	63306	NU-1025	185	194
BRD-K59522102	10um	24	638024	piperine	185	208
BRD-K82561139	10um	24	10666	ricinine	185	170
BRD-A23290232	10um	6	5225092	westcort	185	240
BRD-A49225603	10um	6	5702128	alimemazine	184	213
BRD-K94080537	10um	6	4284	diethyltoluamide	184	179
BRD-K92093830	0.0130000002682um	6	443939	doxorubicin	184	193
BRD-A19500257	0.0130000002682um	24	13017911	geldanamycin	184	177
BRD-K71003802	10um	6	441594	hippeastrine	184	183
BRD-K28912512	10um	24	936	nicotinamide	184	165
BRD-K05395900	10um	6	6708476	nicotine	184	185
BRD-K22429181	10um	24	445354	retinol	184	203
BRD-K88378636	0.370400011539um	24	265237	withaferin-a	184	193
BRD-A01826957	10um	24	9912	xanthinol	184	167
BRD-K97509413	10um	24	5281707	coumestrol	183	214
BRD-K18910433	1.11109995842um	24	5757	estradiol	183	204
BRD-A71390734	3.32999992371um	6	42594	idarubicin	183	184
BRD-K64044582	10um	6	6435901	linoleamide	183	182
BRD-K08973992	10um	24	5280450	linoleic-acid	183	172
BRD-K36377456	10um	6	334704	marmesin	183	212
BRD-K48692744	10um	6	63306	NU-1025	183	186
BRD-A14566392	10um	24	2837667	scopolamine	183	184
BRD-A31107743	0.09um	24	5353446	brefeldin-a	182	223
BRD-A17065207	10um	6	5362868	brefeldin-a	182	207
BRD-A85860691	1.11000001431um	24	161591	chaetocin	182	185
BRD-A84205515	10um	24	6710621	estriol	182	215
BRD-A08709697	10um	6	23930397	heliotrine	182	213
BRD-K73991644	10um	6	5280804	isoquercetin	182	185
BRD-A95445494	10um	6	363863	maackiain	182	223
BRD-K78126613	0.12349999696um	24	4055	menadione	182	183
BRD-K63430059	10um	6	4114	methoxsalen	182	183
BRD-K06792661	0.00150000001304um	24	72376	narciclasine	182	201
BRD-A37052580	10um	24	16212981	physostigmine	182	189
BRD-K93754473	0.0399999991059um	24	2733526	tamoxifen	182	201
BRD-K51033547	10um	6	667511	tramadol	182	173
BRD-A37959677	10um	6	6710658	estrone	181	188
BRD-K64517075	10um	6	5282060	heliomycin	181	212
BRD-A19918940	10um	6	600670	lomatin	181	170
BRD-K06792661	0.00449999980628um	24	72376	narciclasine	181	172
BRD-K22337096	10um	6	515709	phenylalanyltyrosine	181	178
BRD-A19037878	10um	6	6376322	trichostatin-a	181	214
BRD-K44276885	10um	24	444254	acarbose	180	219
BRD-A15100685	0.159999996424um	24	73707595	avicin-d	180	207
BRD-K52015643	10um	6	5316606	deoxyrhapontin	180	149
BRD-A99411506	10um	24	15558439	esculin	180	145
BRD-A18917088	10um	6	5317221	estradiol	180	183
BRD-K06792661	0.370400011539um	24	72376	narciclasine	180	197
BRD-K35708212	10um	24	439501	ouabain	180	213
BRD-K62959606	10um	24	5280335	sphingosine	180	212
BRD-K04412738	10um	24	33741	tramadol	180	154
BRD-K68202742	1.11000001431um	6	444732	trichostatin-a	180	215
BRD-K59163477	10um	6	5311047	cisapride	179	206
BRD-A98431941	10um	6	6710657	ephedrine	179	168
BRD-A59215453	10um	6	96946	lobelanidine	179	210
BRD-K91509126	10um	24	4813	piceatannol	179	178
BRD-A11170096	10um	6	4889	pravastatin	179	206
BRD-K95921201	10um	6	5770	reserpine	179	161
BRD-A81772229	10um	6	4677798	simvastatin	179	220
BRD-K99621550	10um	24	6000	tubocurarine	179	198
BRD-A65327625	10um	6	16211224	6-hydroxytropinone	178	185
BRD-K32610195	10um	24	6128	androstenedione	178	173
BRD-A49160188	10um	6	5741	donepezil	178	227
BRD-K18910433	0.00449999980628um	24	5757	estradiol	178	183
BRD-K18910433	1.11109995842um	6	5757	estradiol	178	167
BRD-A84205515	10um	6	6710621	estriol	178	179
BRD-K89853519	10um	6	442397	fisetinidol	178	161
BRD-A63998256	10um	24	23846563	helveticoside	178	214
BRD-A51393488	10um	24	12310313	noscapine	178	187
BRD-A62326914	10um	6	9951025	paroxetine	178	213
BRD-K91145395	10um	6	454217	prostratin	178	219
BRD-K36452089	0.159999996424um	6	16043	tert-butylhydroquinone	178	199
BRD-A68318914	10um	24	69216	5-methylhydantoin	177	226
BRD-A49225603	10um	24	5702128	alimemazine	177	192
BRD-A33746814	0.159999996424um	24	73707604	avicin-g	177	162
BRD-K03440695	10um	24	10154	boldine	177	175
BRD-K45330754	10um	6	448537	diethylstilbestrol	177	204
BRD-K97440753	10um	6	444034	dihydroergocristine	177	204
BRD-K76674262	0.0412000007927um	24	285033	homoharringtonine	177	196
BRD-A78295502	10um	24	2734756	hydroquinine	177	172
BRD-K04010869	10um	6	5281912	prostaglandin-a1	177	186
BRD-K37206356	10um	6	5281691	rhamnetin	177	136
BRD-A58955223	0.1235um	6	5350	sulforaphane	177	208
BRD-A15034104	10um	24	2356	bergenin	176	167
BRD-A04172077	10um	24	23757203	BRD-A04172077	176	199
BRD-K68077509	10um	6	442021	brucine	176	167
BRD-A68009927	1.11000001431um	6	3085107	daunorubicin	176	175
BRD-K81521265	10um	24	4277	dicyclohexylurea	176	219
BRD-K68620903	10um	6	9051	dydrogesterone	176	243
BRD-K50660797	10um	6	107905	epicatechin	176	175
BRD-K17016787	10um	6	5756	estriol	176	185
BRD-K95402279	10um	24	5281365	geranylgeraniol	176	173
BRD-A19918940	10um	24	600670	lomatin	176	183
BRD-A10070317	10um	24	91536	propranolol	176	167
BRD-K83302049	10um	6	4970	protopine	176	201
BRD-K42142750	10um	24	5281743	retrorsine	176	169
BRD-K20313525	10um	24	5281792	rosmarinic-acid	176	217
BRD-K03816923	9.68um	6	5281847	rottlerin	176	211
BRD-K36452089	10um	6	16043	tert-butylhydroquinone	176	159
BRD-K76133116	10um	24	2724127	benzydamine	175	198
BRD-A49148672	10um	6	24746891	galantamine	175	174
BRD-A19500257	0.00449999980628um	24	13017911	geldanamycin	175	184
BRD-A71390734	10um	6	42594	idarubicin	175	202
BRD-A71390734	0.08um	24	42594	idarubicin	175	180
BRD-A52650764	0.370400011539um	6	5225086	ingenol	175	184
BRD-A70155556	40um	6	3565209	lovastatin	175	214
BRD-K28912512	10um	6	936	nicotinamide	175	180
BRD-A58955223	0.0046um	6	5350	sulforaphane	175	178
BRD-K84036904	10um	24	6010	testosterone	175	218
BRD-K69023402	10um	6	446378	thapsigargin	175	204
BRD-K88378636	0.00449999980628um	6	265237	withaferin-a	175	182
BRD-K36638830	10um	6	641266	anabasine	174	199
BRD-K72726508	10um	6	5327723	arcyriaflavin-a	174	187
BRD-K10466330	0.0399999991059um	24	11719255	AVA	174	173
BRD-A15100685	0.159999996424um	6	73707595	avicin-d	174	199
BRD-A38878059	10um	24	23902994	BL-077	174	217
BRD-K86161929	10um	6	5745	cortisone	174	169
BRD-K81839095	10um	6	5870	estrone	174	209
BRD-K07117950	10um	24	10212	imperatorin	174	189
BRD-K89152108	10um	24	5920	liothyronine	174	181
BRD-K66206289	10um	24	101615	lobeline	174	169
BRD-A70155556	40um	24	3565209	lovastatin	174	195
BRD-K78126613	0.0130000002682um	6	4055	menadione	174	149
BRD-K64994968	10um	24	5994	progesterone	174	217
BRD-K43744935	10um	6	3032583	tamoxifen	174	207
BRD-A16444946	10um	24	41774	acarbose	173	182
BRD-A30395175	10um	6	4014619	BRD-A30395175	173	182
BRD-A85860691	0.08um	6	161591	chaetocin	173	176
BRD-A91699651	0.12349999696um	24	2719	chloroquine	173	212
BRD-A68009927	0.0130000002682um	24	3085107	daunorubicin	173	158
BRD-K32977963	10um	24	3314	eugenol	173	184
BRD-K40619305	10um	24	8369	larixinic-acid	173	172
BRD-K09416995	10um	6	53232	lovastatin	173	184
BRD-A54445976	10um	24	441749	napelline	173	176
BRD-K47869605	10um	24	10607	podophyllotoxin	173	188
BRD-K17497770	10um	6	5281222	butein	172	173
BRD-K61401890	10um	6	107935	deguelin	172	193
BRD-K04046242	10um	24	223368	equilin	172	181
BRD-K20152659	10um	24	5280581	gamma-homolinolenic-acid	172	181
BRD-A36707673	10um	24	73707416	hydroxycholesterol	172	209
BRD-K48692744	0.222200006247um	6	63306	NU-1025	172	197
BRD-K04010869	10um	24	5281912	prostaglandin-a1	172	179
BRD-A42831637	10um	6	6610319	tetrahydrocannabinol-7-oic-acid	172	215
BRD-A20697603	10um	6	16129995	thiostrepton	172	201
BRD-K68202742	0.00449999980628um	6	444732	trichostatin-a	172	195
BRD-K10466330	0.370000004768um	24	11719255	AVA	171	180
BRD-A85860691	1.11000001431um	6	161591	chaetocin	171	196
BRD-A85860691	0.0412000007927um	6	161591	chaetocin	171	178
BRD-A68009927	0.0130000002682um	6	3085107	daunorubicin	171	176
BRD-K39965020	10um	24	445580	doconexent	171	200
BRD-K18910433	10um	6	5757	estradiol	171	186
BRD-A73859745	10um	6	3493	glycodeoxycholic-acid	171	162
BRD-A71390734	0.0412000007927um	6	42594	idarubicin	171	166
BRD-A52650764	0.0130000002682um	24	5225086	ingenol	171	176
BRD-K73991644	10um	24	5280804	isoquercetin	171	192
BRD-K43149758	10um	6	5281672	myricetin	171	208
BRD-A58955223	10um	24	5350	sulforaphane	171	182
BRD-A42831637	10um	24	6610319	tetrahydrocannabinol-7-oic-acid	171	186
BRD-K68202742	0.00449999980628um	24	444732	trichostatin-a	171	184
BRD-A10969569	10um	6	6708518	ambelline	170	195
BRD-A02367930	10um	6	24707	ethinyl-estradiol	170	149
BRD-K84955386	10um	6	5281643	hyperoside	170	164
BRD-A52650764	0.00449999980628um	6	5225086	ingenol	170	175
BRD-K05906022	10um	24	179651	limonin	170	205
BRD-K91301684	10um	24	31411	noscapine	170	194
BRD-K48692744	0.0247000008821um	6	63306	NU-1025	170	167
BRD-K10098805	10um	6	637213	rhapontin	170	209
BRD-K88378636	3.32999992371um	6	265237	withaferin-a	170	195
BRD-A68009927	0.0412000007927um	6	3085107	daunorubicin	169	162
BRD-K77830450	10um	6	6610344	forskolin	169	200
BRD-K76674262	0.12349999696um	24	285033	homoharringtonine	169	176
BRD-K06792661	0.00150000001304um	6	72376	narciclasine	169	172
BRD-K89237706	10um	24	275196	noscapine	169	202
BRD-K05350981	10um	24	5281901	oligomycin-c	169	230
BRD-K50866992	10um	6	656664	tropisetron	169	210
BRD-K88378636	1.11000001431um	6	265237	withaferin-a	169	182
BRD-K81521265	10um	6	4277	dicyclohexylurea	168	157
BRD-K23478508	10um	24	2724385	digoxin	168	197
BRD-K63945320	10um	24	442128	dihydrosamidin	168	195
BRD-K43887077	10um	24	65340	dopamine	168	199
BRD-A18620900	10um	6	5317223	estriol	168	185
BRD-A68631409	10um	24	151289	evodiamine	168	179
BRD-K89853519	10um	24	442397	fisetinidol	168	187
BRD-A78303415	10um	6	5318386	hyoscyamine	168	191
BRD-A43849199	10um	6	23986045	karakoline	168	217
BRD-K88849294	10um	6	73157	lobaric-acid	168	199
BRD-A71765365	10um	6	5052	mepireserpate	168	169
BRD-A45333398	10um	6	6708762	periplocymarin	168	217
BRD-K56700933	10um	6	16741	phenethyl-isothiocyanate	168	197
BRD-K73824630	10um	24	6736	skatole	168	185
BRD-K88378636	1.11000001431um	24	265237	withaferin-a	168	203
BRD-K61269089	10um	6	5280569	daphnetin	167	180
BRD-K63550407	10um	6	12560	erythromycin	167	196
BRD-A63998256	10um	6	23846563	helveticoside	167	224
BRD-A43849199	10um	24	23986045	karakoline	167	159
BRD-K48692744	0.000300000014249um	24	63306	NU-1025	167	186
BRD-K84996949	10um	6	145659	sinensetin	167	156
BRD-K99621550	10um	6	6000	tubocurarine	167	175
BRD-K85013741	10um	6	1550607	auraptene	166	193
BRD-K84709232	10um	24	5281787	caffeic-acid	166	225
BRD-K06467078	10um	6	92766	corynanthine	166	199
BRD-K71003802	10um	24	441594	hippeastrine	166	179
BRD-K78126613	0.370400011539um	6	4055	menadione	166	175
BRD-K88741031	10um	24	5353609	methyl-2,5-dihydroxycinnamate	166	191
BRD-K77641333	10um	6	11079	naphazoline	166	182
BRD-K48692744	0.666700005531um	6	63306	NU-1025	166	153
BRD-K59632282	10um	24	441074	quinidine	166	163
BRD-K44094599	10um	6	6473866	tacrolimus	166	235
BRD-A17065207	10um	24	5362868	brefeldin-a	165	204
BRD-K32828673	10um	6	197810	chelidonine	165	164
BRD-A99571536	10um	24	442897	dubinidine	165	179
BRD-A52650764	0.12349999696um	6	5225086	ingenol	165	176
BRD-A52650764	0.00449999980628um	24	5225086	ingenol	165	174
BRD-K78126613	0.0412000007927um	24	4055	menadione	165	176
BRD-K16195444	10um	6	4636	oxymetazoline	165	182
BRD-A58955223	10um	6	5350	sulforaphane	165	196
BRD-K88378636	0.370400011539um	6	265237	withaferin-a	165	170
BRD-A33746814	0.629999995232um	24	73707604	avicin-g	164	193
BRD-A15034104	10um	6	2356	bergenin	164	193
BRD-A85860691	0.08um	24	161591	chaetocin	164	169
BRD-A06390036	10um	6	45479756	hydroquinidine	164	198
BRD-K02953697	10um	24	442428	naringin	164	169
BRD-A60583491	10um	24	23789069	nitrarine	164	175
BRD-A49906757	10um	24	3000667	scopolamine	164	177
BRD-K68202742	0.370400011539um	6	444732	trichostatin-a	164	205
BRD-A91699651	3.32999992371um	24	2719	chloroquine	163	200
BRD-K94144010	10um	24	854019	cotinine	163	170
BRD-K63913457	10um	24	5312529	eicosatrienoic-acid	163	150
BRD-K06792661	0.12349999696um	6	72376	narciclasine	163	160
BRD-K48692744	0.00820000004023um	6	63306	NU-1025	163	174
BRD-K48692744	0.222200006247um	24	63306	NU-1025	163	164
BRD-K43744935	10um	24	3032583	tamoxifen	163	180
BRD-K90553655	10um	24	5995	testosterone	163	186
BRD-K88378636	0.12349999696um	6	265237	withaferin-a	163	178
BRD-A74500471	10um	6	3279	ethambutol	162	165
BRD-A68631409	10um	6	151289	evodiamine	162	185
BRD-K67783091	10um	24	3559	haloperidol	162	151
BRD-K59197931	10um	6	23681059	naproxen	162	202
BRD-K48692744	0.00270000007004um	6	63306	NU-1025	162	179
BRD-K92870997	10um	24	5281727	pterostilbene	162	187
BRD-K36007650	10um	24	23618032	puromycin	162	185
BRD-K06792661	0.0130000002682um	6	72376	narciclasine	161	156
BRD-K22337096	10um	24	515709	phenylalanyltyrosine	161	158
BRD-K40213712	10um	6	5372720	SAL-1	161	178
BRD-A58955223	0.0137um	6	5350	sulforaphane	161	170
BRD-K68202742	0.12349999696um	6	444732	trichostatin-a	161	222
BRD-K09900591	10um	6	689043	caffeic-acid	160	175
BRD-A85860691	0.00150000001304um	6	161591	chaetocin	160	161
BRD-K76674262	0.0130000002682um	24	285033	homoharringtonine	160	177
BRD-A65767837	10um	6	5702068	hydrocortisone	160	205
BRD-K37080523	10um	6	5701996	isoreserpine	160	203
BRD-K48692744	0.0247000008821um	24	63306	NU-1025	160	169
BRD-A34907681	10um	24	5293655	rutin	160	179
BRD-K46424862	10um	6	5280567	hymecromone	159	154
BRD-K33583600	10um	6	638278	isoliquiritigenin	159	204
BRD-K78126613	0.00150000001304um	24	4055	menadione	159	178
BRD-A15914070	10um	24	5283344	4-hydroxy-2-nonenal	158	231
BRD-A91699651	0.12349999696um	6	2719	chloroquine	158	161
BRD-K43887077	10um	6	65340	dopamine	158	177
BRD-A54487287	10um	6	5702028	cortisone	157	184
BRD-K76674262	0.00449999980628um	24	285033	homoharringtonine	157	132
BRD-K76674262	0.00150000001304um	24	285033	homoharringtonine	156	173
BRD-K98493452	10um	24	72303	honokiol	156	167
BRD-A52650764	0.00150000001304um	24	5225086	ingenol	156	167
BRD-K59197931	10um	24	23681059	naproxen	156	161
BRD-K38449220	10um	24	5281750	seneciphylline	156	165
BRD-K68202742	0.0130000002682um	24	444732	trichostatin-a	156	161
BRD-K06467078	10um	24	92766	corynanthine	155	182
BRD-A73581086	10um	24	3250	ergometrine	155	178
BRD-K32977963	10um	6	3314	eugenol	155	164
BRD-A52650764	0.00150000001304um	6	5225086	ingenol	155	192
BRD-A31107743	0.09um	6	5353446	brefeldin-a	154	199
BRD-A85860691	3.32999992371um	6	161591	chaetocin	154	183
BRD-K43164539	10um	24	221493	cholic-acid	154	195
BRD-K94441233	10um	24	64715	mevastatin	154	209
BRD-K56450366	10um	6	5281894	NSC-94258	154	181
BRD-A58955223	0.629999995232um	24	5350	sulforaphane	154	147
BRD-A91699651	0.00449999980628um	24	2719	chloroquine	153	172
BRD-A91699651	0.0130000002682um	6	2719	chloroquine	153	170
BRD-K10098805	10um	24	637213	rhapontin	153	153
BRD-A97437073	80um	6	77999	rosiglitazone	153	206
BRD-K95808480	10um	24	712318	taxifolin	153	170
BRD-K68202742	0.00150000001304um	6	444732	trichostatin-a	153	170
BRD-A91699651	0.370400011539um	6	2719	chloroquine	152	127
BRD-A99177642	10um	24	5460428	deltaline	152	141
BRD-K24656285	10um	24	445070	farnesol	152	207
BRD-A59215453	10um	24	96946	lobelanidine	152	151
BRD-K36377456	10um	24	334704	marmesin	152	171
BRD-K78126613	1.11000001431um	6	4055	menadione	152	175
BRD-K48692744	0.00089999998454um	6	63306	NU-1025	152	171
BRD-K38323065	10um	24	4754	phenacetin	152	161
BRD-K98521173	10um	24	6166	desoxycortone	151	198
BRD-K55591206	10um	24	65064	epigallocatechin	151	172
BRD-A54236247	10um	24	5032	racephedrine	151	172
BRD-A95696820	10um	24	16667722	acadesine	150	161
BRD-K59163477	10um	24	5311047	cisapride	150	203
BRD-K96527333	10um	24	14709	dehydroisoandosterone	150	203
BRD-K47192521	10um	6	446284	icosapent	150	177
BRD-K78126613	3.32999992371um	6	4055	menadione	150	195
BRD-K73589401	10um	6	5753	corticosterone	149	182
BRD-K61401890	10um	24	107935	deguelin	149	204
BRD-K66944906	10um	24	3083928	fraxidin	149	184
BRD-K13725475	10um	6	4445621	rhodomyrtoxin	149	200
BRD-K25905511	10um	6	6708769	buddleoflavonoloside	148	191
BRD-K88378636	0.12349999696um	24	265237	withaferin-a	148	163
BRD-A85860691	0.0130000002682um	6	161591	chaetocin	147	174
BRD-A85860691	0.00449999980628um	6	161591	chaetocin	147	158
BRD-A91699651	1.11000001431um	6	2719	chloroquine	147	170
BRD-K13664374	10um	24	6597	dichloroacetic-acid	147	166
BRD-K26521938	10um	6	5280360	dinoprostone	147	206
BRD-K89152108	10um	6	5920	liothyronine	147	178
BRD-A10969569	10um	24	6708518	ambelline	146	167
BRD-K06895174	10um	24	6917697	cisapride	146	179
BRD-K76674262	0.0130000002682um	6	285033	homoharringtonine	146	171
BRD-K84955386	10um	24	5281643	hyperoside	146	177
BRD-K59632282	10um	6	441074	quinidine	146	176
BRD-K11433652	10um	6	2244	aspirin	145	178
BRD-K92138166	10um	24	5748555	mammea-a	145	186
BRD-K06792661	0.12349999696um	24	72376	narciclasine	145	172
BRD-K06753942	10um	24	72344	nobiletin	145	198
BRD-A58955223	2.5um	24	5350	sulforaphane	145	178
BRD-K63945320	10um	6	442128	dihydrosamidin	144	182
BRD-K51485625	10um	24	392622	ritonavir	144	165
BRD-A33746814	0.370000004768um	6	73707604	avicin-g	143	174
BRD-A85860691	0.370400011539um	6	161591	chaetocin	143	168
BRD-A85860691	0.00150000001304um	24	161591	chaetocin	143	142
BRD-A71765365	10um	24	5052	mepireserpate	143	174
BRD-K22009844	10um	24	4770	phenprobamate	143	194
BRD-K04010869	1um	24	5281912	prostaglandin-a1	143	172
BRD-K91733562	10um	24	65373	secoisolariciresinol	143	142
BRD-A58955223	0.370000004768um	6	5350	sulforaphane	143	166
BRD-K69608737	10um	6	445643	tacrolimus	143	178
BRD-K40227168	10um	6	71203	vinburnine	143	156
BRD-A91699651	0.0412000007927um	6	2719	chloroquine	142	193
BRD-K52015643	10um	24	5316606	deoxyrhapontin	142	179
BRD-K01624546	10um	24	5312557	docosatrienoic-acid	142	165
BRD-A73581086	10um	6	3250	ergometrine	142	185
BRD-K36452089	1.11000001431um	6	16043	tert-butylhydroquinone	142	177
BRD-K43880410	10um	24	8955	pregnenolone	141	176
BRD-K13725475	10um	24	4445621	rhodomyrtoxin	141	162
BRD-K40213712	10um	24	5372720	SAL-1	141	186
BRD-A91699651	0.00449999980628um	6	2719	chloroquine	140	175
BRD-A54487287	10um	24	5702028	cortisone	140	165
BRD-K76674262	0.00150000001304um	6	285033	homoharringtonine	140	175
BRD-K78126613	0.00150000001304um	6	4055	menadione	140	195
BRD-K36452089	10um	24	16043	tert-butylhydroquinone	140	177
BRD-K36452089	0.629999995232um	24	16043	tert-butylhydroquinone	140	149
BRD-K97951054	10um	6	5281657	BRD-K97951054	139	182
BRD-A15100685	3.32999992371um	6	73707595	avicin-d	138	165
BRD-A49160188	10um	24	5741	donepezil	138	221
BRD-A63646118	151.2um	6	73707380	fumonisin-b1	138	145
BRD-K20152659	10um	6	5280581	gamma-homolinolenic-acid	138	169
BRD-A67373739	10um	24	200	AICA-ribonucleotide	137	168
BRD-A33746814	1.11000001431um	6	73707604	avicin-g	137	166
BRD-K48692744	0.000300000014249um	6	63306	NU-1025	137	190
BRD-A58955223	1.11000001431um	6	5350	sulforaphane	137	174
BRD-A19037878	1.11000001431um	6	6376322	trichostatin-a	137	172
BRD-K32744045	10um	24	3117	disulfiram	136	161
BRD-A73859745	10um	24	3493	glycodeoxycholic-acid	136	163
BRD-K93618743	10um	24	3747	ipriflavone	136	191
BRD-K78126613	0.0412000007927um	6	4055	menadione	136	157
BRD-K43149758	10um	24	5281672	myricetin	136	163
BRD-K15502390	10um	24	4463	nevirapine	136	171
BRD-K48692744	2um	6	63306	NU-1025	136	179
BRD-K04010869	1um	6	5281912	prostaglandin-a1	136	165
BRD-K36452089	0.370000004768um	6	16043	tert-butylhydroquinone	136	161
BRD-K16336526	10um	24	1548942	capsaicin	135	184
BRD-K10207760	10um	6	6426773	lasalocid	135	146
BRD-A37959677	10um	24	6710658	estrone	134	165
BRD-K23583188	10um	6	3894	lavendustin-a	134	173
BRD-A24543851	10um	24	412	nornicotine	134	147
BRD-K96319534	10um	24	70969	phentermine	134	175
BRD-A58955223	0.159999996424um	24	5350	sulforaphane	134	153
BRD-A33746814	3.32999992371um	6	73707604	avicin-g	133	172
BRD-K51095933	10um	24	23674502	estropipate	133	154
BRD-K74133369	10um	6	73707429	oligomycin-a	133	157
BRD-A91699651	3.32999992371um	6	2719	chloroquine	132	171
BRD-K89237706	10um	6	275196	noscapine	132	183
BRD-K37991163	10um	24	62878	paroxetine	132	201
BRD-K36452089	0.159999996424um	24	16043	tert-butylhydroquinone	132	165
BRD-A19037878	3.32999992371um	6	6376322	trichostatin-a	132	167
BRD-A19037878	0.370000004768um	6	6376322	trichostatin-a	132	165
BRD-K68202742	0.0130000002682um	6	444732	trichostatin-a	132	155
BRD-A66395008	10um	6	24870789	parthenolide	131	141
BRD-K50866992	10um	24	656664	tropisetron	131	206
BRD-K74117820	10um	24	64142	nelfinavir	130	193
BRD-K73999723	10um	24	65999	telmisartan	130	167
BRD-A04172077	10um	6	23757203	BRD-A04172077	128	191
BRD-K87226815	10um	24	6234	cycloserine	128	167
BRD-A15100685	1.11000001431um	6	73707595	avicin-d	127	168
BRD-K26117720	10um	24	442793	gingerol	127	162
BRD-K20482099	10um	24	5280805	rutin	125	164
BRD-A58955223	3.32999992371um	6	5350	sulforaphane	125	166
BRD-A63646118	151.2um	24	73707380	fumonisin-b1	124	167
BRD-K09416995	10um	24	53232	lovastatin	124	183
BRD-A97437073	10um	24	77999	rosiglitazone	124	175
BRD-A15100685	0.370000004768um	6	73707595	avicin-d	123	166
BRD-K40758068	10um	24	64139	efavirenz	123	174
BRD-K15262564	10um	6	446596	mupirocin	123	160
BRD-K94649603	10um	24	439533	taxifolin	123	168
BRD-K51730347	10um	24	65057	diphencyprone	122	167
BRD-K17894950	10um	24	5359405	indirubin	122	165
BRD-K78126613	0.00449999980628um	6	4055	menadione	122	171
BRD-K85090592	10um	24	5909	pilocarpine	121	148
BRD-K48195008	10um	24	5991	ethinylestradiol	118	167
BRD-K54790157	10um	24	5585	trioxsalen	117	188
BRD-K21733600	10um	24	5090	rofecoxib	115	174
BRD-K49481516	10um	24	9651	galantamine	114	149
BRD-K10670311	10um	24	5359476	sulfasalazine	112	163
BRD-A48430263	10um	24	60560	pioglitazone	108	171
BRD-K60511616	10um	24	54687	pravastatin	105	158
