# Supplementary material for: Towards natural mimetics of metformin and rapamycin
Source: Aging (Albany NY). 2017 Nov 15;9(11):2245–68. doi: 10.18632/aging.101319 (PMC5723685; doi:10.18632/aging.101319)
Supplement: Supplementary file 5 [file aging-09-2245-s005.xlsx]

## Sheet: Sheet1
Pathway name	Metformin	Ginsenoside	Gamma-linolenic-acid	Withaferin-A	Apigenin
aging_ILK_Pathway	14.9132	1.51209	21.8186	17.4773	0.358844
aging_GSK3_Pathway	13.6742	-0.256312	13.7315	4.89682	1.82221
aging_ERK_Signaling_Pathway	12.5721	1.81635	17.3051	5.63476	-2.26934
aging_MAPK_Signaling _Pathway	11.2493	2.18011	18.0912	13.6505	-4.00308
aging_AKT_Pathway	11.0279	4.74773	30.7347	10.8724	1.35511
aging_cAMP_Pathway	9.23153	0.432518	24.2638	4.45283	-3.29751
aging_JNK_Pathway	8.55849	1.51632	18.3989	17.2136	2.98737
aging_Androgen_receptor_Pathway	7.91766	1.51332	0.447667	13.1612	-1.84948
aging_SMAD_m_Pathway	6.67558	0.682142	2.18908	13.3626	3.74181
aging_SMAD_p_Pathway	6.67558	0.682142	2.18908	13.3626	3.74181
aging_PAK_Pathway	6.66105	3.27562	16.934	8.28185	1.77449
aging_TGF_beta_Pathway	6.24268	2.32592	7.74293	7.35646	1.72844
aging_p38_m_Signaling_Pathway	6.18353	3.13422	14.0352	11.8654	1.71762
aging_PPAR_Pathway	4.27216	1.03019	4.10169	3.48626	-3.57525
aging_Cellular_Anti-Apoptosis_Pathway	4.14942	1.28095	-4.03038	4.5194	-1.1266
aging_STAT3_Pathway	4.14939	3.45846	14.6633	8.12344	3.86612
aging_CREB_Pathway	3.99089	1.22852	5.54338	6.98466	-3.54043
aging_Integrin_SIgnaling_Pathway	3.98389	-0.222847	12.9809	5.82134	-0.969246
aging_PTEN_Pathway	3.02325	-0.257129	1.09341	-0.00334433	0.085481
aging_Estrogen_Pathway	2.71484	1.32281	3.27145	10.0095	-4.49888
aging_mTOR_Pathway	1.9019	1.51003	2.22064	-1.30747	-3.26322
aging_Hypoxia-induced_EMT_in_cancer_and_fibrosis_3	1.81735	0.236225	0.522887	0.901512	0
aging_DNA_Repair_Mechanisms_Pathway	1.78346	-1.02903	0.0282403	-3.76764	-1.12121
aging_GPCR_Pathway	1.64993	3.06637	2.44148	16.0223	-4.63683
aging_Interactions Report	1.62566	0	0.522887	0.358908	0
aging_IL_6_Pathway	1.40915	1.07603	-3.99199	-1.71703	2.95109
aging_Cellular Senescence	1.34513	0.266005	-3.26282	0.23192	-0.08899
aging_Oxidative Stress Response	1.20714	0	-2.62473	3.28074	0.591254
aging_NRF2 Oxidative Stress Response	0.936459	-0.180998	-0.362741	-0.386411	0
aging_Notch	0.921899	0.400039	-0.405498	-0.929089	-0.979852
aging_Hedgehog	0.883821	0.199071	0.85737	-0.299453	-0.281283
aging_p53_Signaling_m_Pathway	0.78122	0.373633	-5.57571	6.51506	-1.6329
aging_Antioxidants	0.659355	1.08035	-3.21818	-0.372915	1.15025
aging_IP3_Pathway	0.516116	0.336581	6.62398	4.73609	-3.74923
aging_Autophagy	0.269869	-0.334652	-1.14171	0.421407	0.315057
aging_Osmotic Stress	0.256602	0	-1.05928	0	-0.16906
aging_TRAF_m_Pathway	0.116557	-0.396889	-0.40437	-1.36984	-0.179282
aging_Cytokine_Network_Pathway	0.0943681	0.912126	4.61453	1.35706	-0.346267
aging_Mismatch Repair	0.0662326	0	0.347986	0.0732664	-0.18462
aging_JAK_mStat_Pathway	0.0296154	0	0.48996	0	-0.164513
aging_Histone Deacetylases	0.0103919	0.153175	0.801124	1.13412	0.47987
aging_WNT	-0.0269133	0.258955	3.56226	-0.980939	-0.029371
aging_IGF-1	-0.0691161	0.312053	0.771787	6.20828	-0.41532
aging_ATM_Pathway	-0.112296	-0.343735	-1.5621	7.02917	-1.29741
aging_Circadian_Pathway	-0.146144	0	0.630001	0.853778	0
aging_Inflammation	-0.256227	1.12926	4.81071	3.70933	-0.193153
aging_ER stress response	-0.305886	0	-0.0133002	0	0.472959
aging_Hedgehog _Pathway	-0.345455	-0.399161	-1.36219	-0.178931	0
aging_NGF_m_Pathway	-0.386228	0.289426	0.690132	-0.203976	0
aging_Chromatin_Pathway	-0.391595	0	1.41936	-0.414395	-0.52438
aging_Hippo	-0.452258	0	-0.156791	-0.372416	0
aging_DNA damage response	-0.466032	0.447891	-3.54867	2.2898	-1.79979
aging_Hypoxia	-0.537173	0.261159	0.327874	4.6137	0.188968
aging_Heat shock response	-0.729175	-0.445001	0.485281	3.74752	1.03541
aging_Circadian Rhythms	-0.839374	0	-1.64727	-0.963046	-0.913157
aging_VEGF_Pathway	-0.981601	-0.043711	0.617626	1.48526	-1.36963
aging_ErbB_Family_Pathway	-1.04044	0.546555	-4.18824	3.68636	-1.23865
aging_Notch_Pathway	-1.04756	0.225586	2.45497	1.54145	0.366236
aging_eIF4e-p70 S6	-1.09819	0	-1.05947	0.651485	0
aging_Growth_Hormone_Pathway	-1.13253	0.550026	-4.04595	-1.50176	-0.124778
aging_DNA Methyltransferases	-1.15302	0	1.16081	-0.825183	0.672555
aging_TNF_m_Pathway	-1.25122	0	-1.93246	-1.19923	0.499371
aging_HGF_Pathway	-1.3731	0.580272	3.51885	3.81895	-1.16976
aging_IGF1R_Signaling_Pathway	-1.39424	0.902806	2.28536	1.65485	-1.99559
aging_mTOR	-1.44078	0	-0.496348	0.651485	0
aging__-catenin	-1.44391	0	2.20387	-1.83168	0
aging_IL_10_Pathway	-1.44468	0.958817	1.479	-4.6643	-0.843421
aging_Nucleotide Excision Repair	-1.47647	0	-4.58715	-0.0724701	-1.07061
aging_Caspase_Cascade	-1.52003	-2.19612	5.64798	-3.19034	2.47617
aging_PI3K-AKT	-1.58625	0	-0.308749	0.652596	-0.111746
aging_Fas_p_Signaling_Pathway	-1.66628	0.509379	-0.557886	-0.813095	-0.516137
aging_CD40_Pathway	-1.69532	0.798805	-0.330695	-1.09749	-1.60601
aging_NFkB	-1.71674	0.796146	4.19289	-1.20379	-0.477555
aging_TRAF_p_Pathway	-1.8551	1.88844	5.57722	5.23937	-1.64206
aging_HIF1Alpha_Pathway	-1.925	0.261159	3.1378	4.8812	-0.775844
aging_Base Excision Repair	-1.93907	-0.0299495	-1.16169	-1.2241	-0.870242
aging_Glucocorticoid_Receptor_Pathway	-2.03771	2.54304	4.5903	12.7683	-0.035669
aging_RAS_Pathway	-2.04237	0.68386	8.62102	3.946	-2.55316
aging_EGFR1_Pathway	-2.09043	0.867352	-3.45697	5.30803	0.706448
aging_Polycomb-Trithorax	-2.13724	-0.208945	-1.46127	0.660549	-0.625878
aging_NGF_p_Pathway	-2.49667	-0.606103	-4.02375	-1.83155	0.598034
aging_Ubiquitination	-2.81436	-0.0357811	-3.25295	0.447617	-0.402747
aging_FLT3_Signaling_Pathway	-3.03391	-0.536089	-3.75599	-2.6566	-1.55608
aging_Double-Strand Break Repair	-3.15612	-0.257957	1.42326	0	-0.502231
aging_RANK_Signaling_in_Osteoclast_Pathway	-3.23403	0.775524	-1.63203	5.03202	-0.567525
aging_TNF_p_Pathway	-3.4627	0.906268	-0.37964	7.42395	-1.1132
aging_Fas_m_Signaling_Pathway	-3.84754	-0.282469	-2.76898	-0.917344	1.40194
aging_Chemokine_Pathway	-3.87918	-0.747935	3.29178	9.76604	0.888127
aging_IL_2_Pathway	-4.15053	1.23287	-9.02154	8.60301	-1.48601
aging_Transcription_of_mRNA_Pathway	-4.48599	-0.63992	-1.6339	-2.89304	0.0362343
aging_Mitochondrial_Apopotosis_m_Pathway	-4.934	-1.37657	2.47304	-2.70871	3.91583
aging_MAPK_Family_Pathway	-5.40774	3.65262	10.0933	8.79096	-1.34193
aging_RNA_Polymerase_II_Complex_Pathway	-5.49122	-0.63992	-2.82678	-2.94789	-0.194627
aging_Mismatch_Repair_Pathway	-6.51161	-0.276702	-1.36149	-0.531668	-1.70278
aging_Erythropoeitin_Pathway	-9.0104	0.637967	-2.98864	5.8899	-0.232446
aging_Wnt_Pathway	-12.0531	-0.790559	-0.836691	-2.91906	-1.61544
aging_Ubiquitin_Proteasome_Pathway	-12.3087	0.277499	-6.50525	-4.69517	-3.26463
