# Supplementary material for: Towards natural mimetics of metformin and rapamycin
Source: Aging (Albany NY). 2017 Nov 15;9(11):2245–68. doi: 10.18632/aging.101319 (PMC5723685; doi:10.18632/aging.101319)
Supplement: Supplementary file 6 [file aging-09-2245-s006.xlsx]

## Sheet: LEF23_comparisons_aging.txt
Combination	Similarity to Metformin
Gamma.linolenic.acid_Withaferin.A_Apigenin	0.727711
Gamma.linolenic.acid_Withaferin.A	0.723883
Ginsenoside_Gamma.linolenic.acid_Withaferin.A_Apigenin	0.722046
Ginsenoside_Gamma.linolenic.acid_Withaferin.A	0.716559
Ginsenoside_Gamma.linolenic.acid_Apigenin	0.697734
Ginsenoside_Gamma.linolenic.acid	0.696578
Gamma.linolenic.acid	0.695619
Gamma.linolenic.acid_Apigenin	0.691551
Ginsenoside_Withaferin.A_Apigenin	0.5788
Ginsenoside_Withaferin.A	0.567213
Withaferin.A_Apigenin	0.566699
Withaferin.A_Apigenin	0.560288
Ginsenoside	0.433229
Ginsenoside_Apigenin	0.347934
Apigenin	0.119565
