# Supplementary material for: Towards natural mimetics of metformin and rapamycin
Source: Aging (Albany NY). 2017 Nov 15;9(11):2245–68. doi: 10.18632/aging.101319 (PMC5723685; doi:10.18632/aging.101319)
Supplement: Supplementary file 7 [file aging-09-2245-s007.xlsx]

## Sheet: Sheet1
Supplementary Table 7 . Pathway-level similarity between metformin and four selected nutraceuticals in terms of pathway activation signature. Shown are pathway activation score (PAS) correlations. For each set, the first row compares PAS for all pathways in the set and the subsequent three rows compare PAS in three functional subsets of these pathways, selected using a PAS threshold of 1/-1 to in…
	Similarity to metformin (PAS correlation)	Gins	GLA	With-A	Apig
Aging Pathways	Overall (n=97)	0.43	0.7	0.56	0.12
Met-activated (n=28)	0.47	0.24	0.1	0.24	0.24
Met-neutral (n=28)	0.01	-0.08	-0.06	0.16	0.16
Met-inhibited (n=41)	0.68	0.77	0.55	0.63	0.63
