# Supplementary material for: Towards natural mimetics of metformin and rapamycin
Source: Aging (Albany NY). 2017 Nov 15;9(11):2245–68. doi: 10.18632/aging.101319 (PMC5723685; doi:10.18632/aging.101319)
Supplement: Supplementary file 8 [file aging-09-2245-s008.xlsx]

## Sheet: Natf_supplementary_table5.txt
pert_id	pert_desc	Number of significant side effects	Mean probability across all adverse reactions	Reproductive.system.and.breast.disorders	Cardiac.disorders	Blood.and.lymphatic.system.disorders	Vascular.disorders	Investigations	Psychiatric.disorders	General.disorders.and.administration.site.conditions	Skin.and.subcutaneous.tissue.disorders	Endocrine.disorders	Gastrointestinal.disorders	Hepatobiliary.disorders	Eye.disorders	Musculoskeletal.and.connective.tissue.disorders	Nervous.system.disorders	Respiratory..thoracic.and.mediastinal.disorders	Immune.system.disorders	Congenital..familial.and.genetic.disorders	Metabolism.and.nutrition.disorders	Neoplasms.benign..malignant.and.unspecified..incl.cysts.and.polyps.	Ear.and.labyrinth.disorders	Infections.and.infestations	Renal.and.urinary.disorders	Pregnancy..puerperium.and.perinatal.conditions	Injury..poisoning.and.procedural.complications	Social.circumstances	Surgical.and.medical.procedures	Vulvovaginal.disorders..excl.infections.and.inflammations.	Heart.failures	Haemoglobinopathies	Vascular.haemorrhagic.disorders	Cardiac.and.vascular.investigations..excl.enzyme.tests.	Personality.disorders.and.disturbances.in.behaviour	Haemolyses.and.related.conditions	Anaemias.nonhaemolytic.and.marrow.depression	General.system.disorders.NEC	Skin.appendage.conditions	Endocrine.disorders.of.gonadal.function	Sleep.disorders.and.disturbances	Gastrointestinal.conditions.NEC	Hepatic.and.hepatobiliary.disorders	Skin.and.subcutaneous.tissue.infections.and.infestations	Gastrointestinal.inflammatory.conditions	Coagulopathies.and.bleeding.diatheses..excl.thrombocytopenic.	Gastrointestinal.signs.and.symptoms	Retina..choroid.and.vitreous.haemorrhages.and.vascular.disorders	Musculoskeletal.and.connective.tissue.neoplasms
BRD-A35769934	BRD-A35769934	3	0.0505045	0.0133128	0.201947	0.0647664	0.037258	0.0434639	0.189352	0.00481186	0.00550663	0.0337899	0.0445231	2.39532e-05	0.000119741	0.00624737	0.244426	0.0948697	0.377975	0.00856098	0.0179496	0.0238524	0.00184468	0.112498	0.0361129	0.0263395	0.0156118	0.0313302	0.0598325	0.000130915	0.00733265	2.31292e-06	0.0262113	0.0201686	0.0059501	0.0240808	0.0167404	0.0232811	0.0151879	1.36774e-05	0.0422952	0.0142471	0.00236022	0.0020929	0.00443922	1.54795e-05	0.0800643	0.000288055	0.000595609
BRD-A15501135	BRD-A15501135	3	0.0512293	0.0123197	0.22318	0.0846509	0.096097	0.0795823	0.189613	0.00779354	0.00477962	0.0354664	0.0671749	8.95215e-05	0.000158712	0.00340425	0.298095	0.0962834	0.376915	0.0070082	0.0119251	0.0581448	0.00159876	0.1411	0.0349252	0.0234502	0.0166286	0.0312848	0.124995	9.76103e-05	0.00738863	9.56585e-07	0.0263018	0.0245201	0.00283646	0.0399053	0.0261538	0.0201416	0.0163695	1.81895e-05	0.0630432	0.012781	0.00423765	0.00277553	0.024533	1.76845e-05	0.0720192	0.000339489	5.61332e-06
BRD-A37501891	BRD-A37501891	3	0.051675	0.0159226	0.209553	0.0648398	0.0530912	0.0607443	0.202712	0.0241215	0.0219076	0.0187444	0.0981725	5.74696e-05	0.00391953	0.0406762	0.239826	0.10529	0.380096	0.0377239	0.0251425	0.0100735	0.00373606	0.0949689	0.0301765	0.0252517	0.0300736	0.040645	0.0446439	0.000118903	0.00606565	1.48827e-06	0.0316861	0.0349788	0.00502013	0.0563692	0.0166711	0.0838213	0.00943884	0.000132641	0.0461519	0.0109609	0.000263779	0.00247536	0.00263241	1.77416e-05	0.144157	0.00359144	0.00146443
BRD-K85565420	BRD-K85565420	3	0.0669265	0.0702376	0.286586	0.139179	0.0833494	0.176682	0.26236	0.0807955	0.00948004	0.0679612	0.106743	0.00272008	0.000324442	0.0280496	0.270776	0.138794	0.38049	0.0407453	0.0326256	0.043725	0.00378678	0.129228	0.0389887	0.0285792	0.0323874	0.0776785	0.107091	0.000154047	0.00509491	0.00012353	0.0394626	0.0829411	0.005498	0.0662995	0.0610494	0.0963869	0.0345538	0.000298192	0.0319602	0.015421	0.000759538	0.00245939	0.00534358	1.28525e-05	0.140982	0.0023238	0.00162546
BRD-K34079378	BRD-K34079378	4	0.126582	0.161452	0.345308	0.297179	0.332474	0.350602	0.198743	0.180131	0.248992	0.0915356	0.13532	0.190561	0.0714028	0.120344	0.282849	0.208768	0.360907	0.180849	0.172734	0.139136	0.107559	0.225394	0.250017	0.218441	0.0387937	0.114395	0.106623	0.00203892	0.134306	4.46151e-05	0.077836	0.116723	0.163409	0.20935	0.15747	0.187757	0.172047	0.112624	0.278424	0.0726518	0.246781	0.00379098	0.176839	0.00212733	0.260857	0.0696391	0.00309845
BRD-A94546435	BRD-A94546435	5	0.128417	0.194367	0.314079	0.318126	0.36731	0.371826	0.189553	0.120359	0.304485	0.0686902	0.110424	0.188556	0.0632374	0.12444	0.308954	0.21094	0.363195	0.221994	0.157311	0.144938	0.104555	0.221838	0.292579	0.233364	0.0406301	0.125707	0.115002	0.0031604	0.12473	2.43447e-06	0.0876818	0.118811	0.165001	0.222346	0.196314	0.142395	0.190448	0.0925787	0.283672	0.0815684	0.208443	0.0293981	0.188097	0.00106326	0.243761	0.0343508	0.0411896
BRD-A11731846	BRD-A11731846	5	0.142593	0.298595	0.388303	0.331061	0.324764	0.405495	0.21738	0.262732	0.376418	0.0452217	0.240032	0.212685	0.0795539	0.17141	0.326816	0.248542	0.365639	0.224333	0.208039	0.153459	0.156316	0.261171	0.32448	0.170195	0.0452321	0.167301	0.150459	0.00190408	0.17412	0.000359942	0.0986939	0.174787	0.117073	0.254491	0.211212	0.312937	0.204435	0.0869537	0.328679	0.0624727	0.192887	0.00215688	0.171492	0.000619537	0.289387	0.103659	0.0175632
BRD-K51980294	syringic-acid	6	0.133611	0.189522	0.325148	0.3062	0.359459	0.368557	0.189072	0.125574	0.284417	0.0731532	0.179778	0.199499	0.118554	0.124208	0.307932	0.226995	0.362831	0.18003	0.161081	0.130106	0.107735	0.227487	0.278204	0.245516	0.039405	0.13346	0.135222	0.0076789	0.136972	1.09475e-05	0.0963169	0.129304	0.150695	0.221586	0.219175	0.196548	0.183655	0.106675	0.260431	0.103332	0.207977	0.00500288	0.193948	0.00355364	0.26002	0.0770564	0.0457919
BRD-K11590034	morin	6	0.173331	0.165465	0.367784	0.314687	0.28812	0.261402	0.215871	0.564239	0.585847	0.0747486	0.238782	0.0872936	0.131809	0.284674	0.281086	0.310193	0.40027	0.31736	0.126817	0.156444	0.0793213	0.309571	0.261265	0.242152	0.0960214	0.183876	0.351929	0.0633082	0.187081	5.96818e-05	0.13642	0.14701	0.30222	0.271959	0.325772	0.344784	0.235843	0.113024	0.340452	0.23213	0.170902	0.052675	0.257926	0.109712	0.241044	0.162906	0.0123988
BRD-A59728941	BRD-A59728941	7	0.143498	0.183944	0.449504	0.427882	0.285336	0.410067	0.301652	0.326845	0.654224	0.0345871	0.371496	0.205068	0.0869648	0.376742	0.346916	0.185221	0.352587	0.379483	0.466509	0.137168	0.128106	0.168764	0.260724	0.262053	0.141191	0.224039	0.401493	0.000441373	0.133784	1.20097e-05	0.124483	0.256847	0.447661	0.211557	0.170465	0.401246	0.262864	0.12519	0.131883	0.0627515	0.336473	0.00280786	0.253808	0.000540358	0.374648	0.0343325	4.26408e-06
BRD-K36452089	tert-butylhydroquinone	8	0.107751	0.311441	0.427537	0.299692	0.105681	0.11195	0.325502	0.443649	0.407042	0.0181578	0.358194	0.041055	0.281595	0.360398	0.242118	0.329628	0.379728	0.0317228	0.0713881	0.0150295	0.00387636	0.285867	0.342972	0.0473179	0.0158636	0.0440981	0.446416	0.398201	0.306195	5.76764e-05	0.0275752	0.0300704	0.105069	0.0539638	0.374286	0.0607997	0.0254779	0.00910923	0.329498	0.052381	0.346229	0.0181162	0.34974	0.266076	0.0823614	0.0226012	0.00730656
BRD-K07476834	BRD-K07476834	8	0.117081	0.158031	0.346149	0.319404	0.294503	0.343149	0.4194	0.564713	0.0733583	0.0200537	0.476802	0.211183	0.266306	0.136325	0.155057	0.0937744	0.384068	0.379826	0.376853	0.140519	0.00673275	0.1376	0.0363793	0.0586635	0.471013	0.194395	0.0213256	0.0190854	0.118199	3.89423e-07	0.117259	0.127898	0.411879	0.107358	0.0942742	0.387807	0.306659	0.309625	0.0826216	0.206701	0.278025	0.195314	0.0413524	0.00286885	0.351279	0.0100225	0.000902773
BRD-K06692906	Gossypetin	8	0.166911	0.121716	0.308183	0.297922	0.246115	0.211133	0.205545	0.357534	0.395334	0.0528376	0.264397	0.036509	0.0500516	0.271046	0.278139	0.303988	0.396064	0.356642	0.0927905	0.116257	0.0605152	0.2817	0.270411	0.249794	0.0564747	0.203282	0.341508	0.0476854	0.0875146	1.03174e-05	0.08305	0.11344	0.288549	0.249524	0.282141	0.215574	0.167944	0.130338	0.344345	0.190276	0.0941926	0.0486252	0.188332	0.0702894	0.227994	0.192624	0.0443298
BRD-K58443469	ST-059620	8	0.173902	0.137236	0.315706	0.319657	0.248196	0.258885	0.196193	0.470305	0.481809	0.0722615	0.271859	0.0863687	0.0743607	0.260725	0.273998	0.298651	0.39816	0.355298	0.103654	0.154997	0.0620002	0.29236	0.278123	0.237819	0.0591391	0.226409	0.34953	0.1004	0.0943862	1.09337e-05	0.0958184	0.120384	0.282151	0.261648	0.302066	0.249761	0.173924	0.144669	0.347983	0.241198	0.155755	0.0475814	0.187147	0.0720668	0.229866	0.219733	0.07166
BRD-A64242993	lanatoside-c	9	0.115956	0.436912	0.470324	0.327699	0.273907	0.428702	0.457672	0.673709	0.207144	0.0300753	0.517073	0.0246806	0.475677	0.22939	0.266764	0.119233	0.39616	0.0330825	0.658247	0.076	0.0184335	0.0970099	0.03714	0.128613	0.478515	0.11124	0.0222437	0.0291453	0.0824413	1.43298e-06	0.0528729	0.232801	0.579499	0.0621365	0.0727524	0.631289	0.0330207	0.178591	0.0874055	0.27945	0.171319	0.0344838	0.0116404	0.00332485	0.212418	0.00576851	8.38228e-07
BRD-K43149758	myricetin	9	0.245899	0.289996	0.428688	0.392653	0.326977	0.353041	0.324836	0.635026	0.578958	0.18931	0.420459	0.2322	0.231588	0.360537	0.377696	0.364692	0.400426	0.383006	0.290999	0.275777	0.207625	0.336744	0.325622	0.300691	0.202455	0.30997	0.36063	0.166524	0.223049	0.000820175	0.227004	0.276466	0.363191	0.317272	0.351408	0.452868	0.330722	0.230699	0.357909	0.33892	0.275602	0.188206	0.294289	0.123254	0.339318	0.28775	0.139009
BRD-K60237333	niacin	11	0.146471	0.281731	0.338055	0.267843	0.357067	0.355188	0.216456	0.390494	0.520869	0.108577	0.162046	0.201206	0.206971	0.249579	0.315374	0.250565	0.364154	0.223832	0.258331	0.184006	0.204636	0.227011	0.295532	0.222463	0.086035	0.131081	0.100064	0.00275475	0.123542	5.47233e-06	0.083946	0.158931	0.117076	0.262684	0.147558	0.251402	0.17189	0.134904	0.289014	0.0857513	0.165746	0.0133435	0.173268	0.00239501	0.277274	0.0437082	0.00137894
BRD-A35033682	eriodictyol	13	0.272289	0.394842	0.518181	0.452879	0.412372	0.452472	0.379739	0.786518	0.713866	0.280769	0.556899	0.269955	0.396411	0.451931	0.40612	0.417465	0.406056	0.391864	0.39841	0.323184	0.261078	0.380936	0.379574	0.312429	0.236557	0.358161	0.389063	0.155842	0.308634	0.000865111	0.277822	0.364346	0.365872	0.385358	0.40919	0.656598	0.359098	0.316939	0.389716	0.36919	0.322801	0.140231	0.337463	0.138163	0.438957	0.256881	0.112398
BRD-A84066268	BRD-A84066268	14	0.134387	0.551773	0.480256	0.480573	0.321137	0.55631	0.604386	0.812242	0.411816	0.0464042	0.465326	0.104543	0.626264	0.178628	0.317498	0.177609	0.387668	0.159752	0.704587	0.128172	0.00149913	0.108304	0.0459314	0.117904	0.367734	0.200801	0.100576	0.0274955	0.109492	3.13418e-07	0.0774422	0.421466	0.712247	0.137427	0.0575832	0.725121	0.0123802	0.237472	0.13558	0.246204	0.114836	0.0601912	0.0058924	0.0129231	0.337749	0.00648818	0.000498251
BRD-K15563106	phloretin	14	0.177187	0.175173	0.494256	0.419038	0.355369	0.341905	0.368453	0.542119	0.658095	0.331342	0.498365	0.243032	0.302743	0.370501	0.285779	0.175987	0.402562	0.333792	0.366919	0.215521	0.140855	0.223931	0.182744	0.02402	0.409659	0.217061	0.163651	0.110237	0.191088	1.80446e-05	0.167062	0.363917	0.246564	0.414213	0.534698	0.366564	0.536906	0.265356	0.287605	0.293694	0.263618	0.301987	0.255465	0.0284996	0.457737	0.52896	0.00666606
BRD-A62200266	BRD-A62200266	14	0.27365	0.294016	0.432318	0.392829	0.409645	0.408922	0.314915	0.730415	0.720282	0.249498	0.449822	0.282588	0.287722	0.410899	0.390984	0.40089	0.409054	0.365731	0.428518	0.333059	0.317525	0.360839	0.361104	0.292407	0.259189	0.347606	0.332615	0.203612	0.226102	0.0290187	0.294376	0.325626	0.387602	0.333112	0.355703	0.542788	0.386006	0.257496	0.338323	0.390406	0.397149	0.246983	0.359604	0.101705	0.376079	0.275884	0.184214
BRD-K09497549	kawain	15	0.273899	0.439278	0.566162	0.420582	0.396169	0.424675	0.424149	0.759793	0.747709	0.298015	0.595928	0.346116	0.447365	0.481537	0.532592	0.419451	0.407467	0.367122	0.533574	0.3557	0.286154	0.35162	0.388966	0.280035	0.321695	0.343057	0.327693	0.158544	0.264404	0.00647159	0.306956	0.375275	0.374933	0.340306	0.363237	0.667918	0.409504	0.30546	0.369637	0.410298	0.39018	0.177747	0.30952	0.107429	0.491499	0.289782	0.183336
BRD-A37867643	safrolglycol	15	0.278357	0.425875	0.538129	0.394974	0.343812	0.388576	0.377627	0.770757	0.750423	0.254156	0.58397	0.293652	0.373584	0.431181	0.520231	0.37873	0.401019	0.395731	0.453754	0.34756	0.284065	0.338796	0.356401	0.314067	0.299632	0.347359	0.352645	0.170708	0.286663	0.00136868	0.302426	0.358698	0.408648	0.312015	0.353814	0.626819	0.403511	0.330122	0.355457	0.424821	0.377251	0.253385	0.296263	0.107118	0.434654	0.323037	0.17462
BRD-K48935217	epothilone	15	0.280883	0.386992	0.481816	0.463666	0.400987	0.459941	0.327613	0.811927	0.705143	0.310835	0.58077	0.322592	0.392747	0.442239	0.434105	0.407239	0.403935	0.36684	0.436162	0.370257	0.311735	0.371185	0.390097	0.325852	0.307988	0.382864	0.350592	0.204228	0.316091	0.00166333	0.299511	0.387425	0.395929	0.316175	0.415924	0.644224	0.422108	0.311039	0.351513	0.415754	0.417178	0.289198	0.343179	0.18145	0.490954	0.310611	0.101009
BRD-A66199457	asiaticoside	16	0.277891	0.405934	0.552377	0.431365	0.364678	0.420293	0.411132	0.739769	0.704473	0.253844	0.569196	0.315385	0.378171	0.425438	0.512142	0.379135	0.40249	0.388319	0.439918	0.36224	0.276806	0.363561	0.387703	0.294503	0.312992	0.341892	0.357808	0.122998	0.2764	0.00330028	0.336112	0.372367	0.390344	0.31433	0.377254	0.576793	0.422281	0.290476	0.36715	0.419772	0.377499	0.236153	0.334335	0.124219	0.492685	0.295989	0.150459
BRD-K36377456	marmesin	16	0.281408	0.406462	0.558351	0.403772	0.336445	0.387403	0.383327	0.818443	0.72714	0.268905	0.584002	0.301217	0.366431	0.427709	0.546139	0.40692	0.40297	0.399104	0.406104	0.358266	0.281593	0.361096	0.349951	0.303437	0.298521	0.347645	0.355984	0.11984	0.293259	0.000398087	0.316585	0.368765	0.400665	0.312552	0.362015	0.616452	0.40699	0.315777	0.355819	0.418853	0.382841	0.266673	0.316541	0.140093	0.464917	0.311602	0.13619
BRD-K97951054	BRD-K97951054	16	0.28231	0.337324	0.478366	0.459403	0.369289	0.436312	0.343464	0.764745	0.67843	0.279426	0.538937	0.30913	0.325384	0.462647	0.401602	0.415198	0.401328	0.386198	0.494708	0.362583	0.329121	0.382901	0.408834	0.316856	0.305153	0.363658	0.353076	0.19685	0.330118	0.00536367	0.309553	0.370879	0.378807	0.339712	0.395248	0.548336	0.402921	0.255088	0.351385	0.4141	0.387081	0.360394	0.370882	0.164454	0.477467	0.332471	0.116003
BRD-A98888159	BRD-A98888159	16	0.283219	0.344606	0.467567	0.438866	0.437221	0.427983	0.322136	0.748695	0.717572	0.24042	0.552083	0.321445	0.348855	0.419427	0.399569	0.449126	0.405248	0.374208	0.458371	0.367093	0.303686	0.391312	0.385421	0.352453	0.289447	0.378792	0.354427	0.257053	0.318702	0.00609521	0.322851	0.346114	0.399619	0.330988	0.384873	0.52899	0.398809	0.270198	0.350536	0.425336	0.391461	0.375132	0.41241	0.152677	0.478337	0.307372	0.0781186
BRD-K81209159	herniarin	16	0.287069	0.338303	0.503222	0.395455	0.445541	0.407754	0.363139	0.855823	0.769644	0.241171	0.501013	0.288202	0.4051	0.389973	0.443574	0.382031	0.403998	0.394192	0.439312	0.36341	0.320029	0.36206	0.377459	0.371247	0.312011	0.364842	0.356913	0.221476	0.299864	0.00622392	0.333242	0.419658	0.403368	0.360744	0.353944	0.636751	0.407254	0.283619	0.358635	0.397508	0.377076	0.163203	0.288397	0.121573	0.449892	0.317066	0.323853
BRD-A17535965	gelsemine	17	0.277713	0.430957	0.581888	0.429201	0.377775	0.436666	0.412939	0.796756	0.801441	0.272582	0.590575	0.330276	0.351857	0.443292	0.516112	0.423867	0.406218	0.396793	0.50446	0.356783	0.274832	0.373746	0.405382	0.276824	0.341668	0.33688	0.345581	0.158158	0.262472	0.00198204	0.338689	0.398709	0.402148	0.354948	0.362214	0.698937	0.446037	0.308671	0.368017	0.416807	0.396407	0.20368	0.305731	0.119228	0.504462	0.261387	0.199661
BRD-K25905511	buddleoflavonoloside	17	0.280084	0.364423	0.51801	0.411628	0.462796	0.441178	0.417212	0.834159	0.73003	0.278719	0.650798	0.293486	0.390738	0.412498	0.461393	0.380185	0.410777	0.365161	0.439249	0.333826	0.317693	0.37052	0.379419	0.296639	0.291041	0.350974	0.343079	0.103325	0.300196	0.00133505	0.299647	0.416955	0.395115	0.362449	0.354617	0.706827	0.404249	0.317971	0.380623	0.38178	0.382577	0.170597	0.292639	0.103067	0.487886	0.292308	0.204947
BRD-K32828673	chelidonine	17	0.281148	0.453717	0.567235	0.525215	0.318577	0.522142	0.389221	0.822608	0.790277	0.365742	0.669406	0.386594	0.36348	0.485273	0.513616	0.356748	0.40677	0.379212	0.466002	0.369493	0.33021	0.340173	0.452596	0.272661	0.350878	0.365689	0.371027	0.0813789	0.275711	0.00324255	0.299697	0.426404	0.402583	0.330094	0.44632	0.741487	0.470659	0.367471	0.364116	0.37871	0.444338	0.221364	0.255409	0.185362	0.600858	0.252965	0.0981362
BRD-K35586044	yohimbine	17	0.281613	0.425225	0.547099	0.382772	0.348627	0.398275	0.37222	0.798662	0.724198	0.262791	0.583634	0.307675	0.388503	0.399898	0.516173	0.407765	0.401741	0.404091	0.411575	0.351766	0.288097	0.351881	0.363454	0.317885	0.304713	0.356064	0.354198	0.145833	0.292896	0.000687292	0.303491	0.374084	0.407443	0.327577	0.343012	0.610526	0.400805	0.288996	0.354842	0.423146	0.361239	0.271932	0.313565	0.143606	0.414441	0.323506	0.147014
BRD-K22337096	phenylalanyltyrosine	17	0.281868	0.419432	0.53162	0.372533	0.31873	0.399677	0.387421	0.793002	0.704048	0.270757	0.521062	0.293574	0.37722	0.43274	0.522377	0.393995	0.399695	0.397916	0.424648	0.345946	0.274015	0.347096	0.373591	0.316417	0.30328	0.352702	0.350825	0.180275	0.289486	0.00120179	0.301902	0.353394	0.410056	0.33154	0.336369	0.628532	0.384681	0.32555	0.35259	0.416983	0.36734	0.221733	0.309553	0.138928	0.445942	0.319515	0.165783
BRD-A36707673	hydroxycholesterol	17	0.285162	0.287239	0.413159	0.464163	0.393086	0.418005	0.290662	0.75607	0.746205	0.287861	0.493097	0.312035	0.333474	0.355771	0.397334	0.451393	0.396393	0.386899	0.505988	0.366819	0.331445	0.382916	0.39464	0.366718	0.273668	0.354706	0.361639	0.197909	0.342933	0.00754647	0.370902	0.342478	0.406411	0.330569	0.385436	0.51803	0.431501	0.251195	0.331349	0.432424	0.432732	0.398656	0.422839	0.284494	0.402436	0.263475	0.106212
BRD-K06467078	corynanthine	17	0.289144	0.41628	0.550109	0.413052	0.372577	0.411192	0.388196	0.808865	0.758668	0.285327	0.545886	0.338757	0.420691	0.449477	0.50866	0.407106	0.401665	0.403827	0.448905	0.361858	0.283756	0.362931	0.378223	0.315003	0.33599	0.358195	0.354302	0.22801	0.312008	0.00345561	0.310948	0.375638	0.415005	0.334777	0.362185	0.61723	0.410666	0.305117	0.35635	0.431389	0.386354	0.265273	0.312954	0.138174	0.419471	0.333177	0.165218
BRD-A68039575	liquiritigenin	17	0.289895	0.420226	0.537496	0.414283	0.335728	0.413014	0.400743	0.789193	0.698437	0.265562	0.540207	0.333798	0.371875	0.40579	0.526104	0.406016	0.403106	0.404133	0.433516	0.36965	0.32539	0.368561	0.376469	0.299345	0.322383	0.352277	0.350526	0.129998	0.322354	0.000799623	0.328531	0.359861	0.404049	0.323268	0.370744	0.603874	0.418958	0.309524	0.353733	0.430566	0.366831	0.264185	0.341253	0.141356	0.47679	0.343066	0.225259
BRD-K63430059	methoxsalen	17	0.292077	0.33033	0.462111	0.418608	0.389	0.396421	0.375724	0.836515	0.747406	0.258644	0.636883	0.303011	0.392577	0.441808	0.400548	0.347521	0.405909	0.399014	0.443643	0.353859	0.304671	0.369288	0.371951	0.304099	0.340975	0.343581	0.362771	0.138492	0.275697	0.0369702	0.313122	0.356788	0.421794	0.380516	0.370736	0.595811	0.459262	0.314013	0.355168	0.407846	0.390686	0.216004	0.32589	0.180226	0.481694	0.388425	0.126848
BRD-K53523901	arctigenin	17	0.295112	0.478556	0.529742	0.544094	0.417813	0.467269	0.374269	0.76977	0.779439	0.306887	0.553498	0.306918	0.478211	0.456941	0.422092	0.442256	0.398593	0.384448	0.491619	0.352597	0.327459	0.382322	0.420935	0.368623	0.295752	0.327436	0.356701	0.17426	0.369424	0.00554507	0.358713	0.399895	0.351272	0.340376	0.408232	0.605398	0.393955	0.323525	0.362179	0.386779	0.383385	0.273015	0.43448	0.10628	0.496626	0.23154	0.155917
BRD-K93325701	damnacanthal	18	0.275903	0.355729	0.454378	0.368981	0.376508	0.391149	0.325644	0.793911	0.783119	0.213993	0.442787	0.258914	0.377797	0.391526	0.486135	0.364798	0.394994	0.368851	0.403797	0.341737	0.313928	0.345155	0.345971	0.389021	0.288951	0.356516	0.329324	0.151222	0.305385	9.74531e-05	0.27585	0.409732	0.402407	0.299672	0.352323	0.597215	0.349789	0.284245	0.360012	0.400596	0.349204	0.223757	0.29372	0.101027	0.408686	0.281268	0.208562
BRD-A24817035	laudanosine	18	0.279628	0.390919	0.547856	0.415321	0.339713	0.409683	0.406426	0.778813	0.721782	0.250944	0.577825	0.317261	0.401009	0.433177	0.52322	0.392996	0.40264	0.402915	0.473215	0.35314	0.296969	0.352765	0.389117	0.303412	0.323301	0.351332	0.347294	0.117426	0.271275	0.00113953	0.311078	0.366961	0.406919	0.32251	0.359621	0.603842	0.397906	0.281839	0.359652	0.429053	0.366506	0.207748	0.303136	0.0979811	0.488062	0.335616	0.139924
BRD-K10098805	rhapontin	18	0.283618	0.42265	0.568035	0.394602	0.373176	0.404217	0.390389	0.819943	0.759615	0.271092	0.576856	0.307857	0.416901	0.426049	0.519163	0.393212	0.402583	0.397378	0.494817	0.357164	0.282377	0.352286	0.378473	0.309948	0.306903	0.349368	0.34907	0.186112	0.290414	0.00157597	0.307063	0.361164	0.408898	0.31841	0.354009	0.661141	0.40191	0.318247	0.360444	0.417759	0.373814	0.243971	0.293698	0.154136	0.480263	0.323151	0.165648
BRD-A54445976	napelline	18	0.283959	0.417523	0.53533	0.40352	0.365097	0.400408	0.388544	0.80114	0.781215	0.268077	0.577319	0.318352	0.368689	0.450299	0.512979	0.413177	0.402109	0.408844	0.469401	0.363604	0.302835	0.357312	0.386035	0.29474	0.319704	0.35151	0.356671	0.131258	0.288737	0.00247567	0.310762	0.376521	0.402134	0.337025	0.369873	0.636714	0.407982	0.309405	0.359466	0.436741	0.380216	0.265897	0.329026	0.127098	0.46921	0.31821	0.171048
BRD-A42346008	metanephrine	18	0.28442	0.422145	0.528715	0.38652	0.336606	0.407376	0.381996	0.773446	0.705388	0.271354	0.576043	0.302543	0.391107	0.408899	0.529919	0.394572	0.401278	0.398593	0.42387	0.34867	0.276803	0.352432	0.363983	0.335584	0.295778	0.357299	0.347721	0.232617	0.293781	0.00382421	0.299627	0.367454	0.41388	0.327294	0.35349	0.558017	0.391227	0.332694	0.364955	0.425301	0.373189	0.236151	0.315738	0.126762	0.478897	0.355918	0.224089
BRD-A73859745	glycodeoxycholic-acid	18	0.288878	0.43561	0.528618	0.402013	0.381719	0.417805	0.400035	0.819841	0.699171	0.30624	0.615962	0.303526	0.405407	0.4309	0.512534	0.414007	0.403953	0.407241	0.46502	0.354128	0.317416	0.356119	0.395273	0.308963	0.322516	0.357548	0.362527	0.171752	0.291462	0.0013295	0.311169	0.384776	0.41906	0.332931	0.352933	0.571648	0.418742	0.31632	0.371992	0.4327	0.379738	0.284444	0.326582	0.153929	0.49096	0.329329	0.207654
BRD-K89237706	noscapine	18	0.289252	0.363209	0.483181	0.449261	0.359815	0.423002	0.384755	0.757837	0.658578	0.284732	0.511525	0.333463	0.330647	0.422121	0.458684	0.378391	0.398983	0.418347	0.427136	0.356717	0.30733	0.365109	0.360515	0.335424	0.294598	0.361633	0.364874	0.193677	0.292315	0.000661282	0.311167	0.376725	0.422316	0.347639	0.381056	0.477151	0.430993	0.303781	0.357848	0.41521	0.384669	0.272938	0.317989	0.179957	0.405965	0.367739	0.22152
BRD-K43468059	byssochlamic-acid	18	0.289256	0.475429	0.576425	0.423977	0.354643	0.405613	0.421247	0.812358	0.775278	0.267164	0.652844	0.314808	0.469095	0.475551	0.534672	0.447426	0.406477	0.404767	0.477008	0.364869	0.273489	0.363849	0.393029	0.307944	0.32999	0.349622	0.34941	0.239896	0.271931	0.00316484	0.329429	0.387067	0.412519	0.3219	0.360444	0.668812	0.410562	0.310735	0.383084	0.435918	0.37446	0.225399	0.32884	0.131921	0.453337	0.317707	0.205362
BRD-A19918940	lomatin	18	0.290957	0.41863	0.557189	0.43242	0.346905	0.407467	0.413742	0.786691	0.713305	0.24474	0.577717	0.318088	0.382355	0.438656	0.496888	0.384396	0.401223	0.40842	0.47678	0.356458	0.314271	0.368237	0.416305	0.308858	0.329007	0.342218	0.364458	0.181118	0.306534	0.00660559	0.35806	0.374278	0.395633	0.332466	0.36265	0.582391	0.432519	0.299044	0.36195	0.418755	0.381807	0.292467	0.319658	0.129615	0.494311	0.320635	0.189776
BRD-K05395900	nicotine	18	0.293803	0.376893	0.477535	0.432263	0.401203	0.409506	0.36195	0.83303	0.740802	0.273084	0.654727	0.310174	0.398005	0.427064	0.42009	0.390179	0.404951	0.390076	0.480192	0.358292	0.320377	0.375448	0.399401	0.294934	0.350105	0.353494	0.366269	0.156372	0.291828	0.0221101	0.344877	0.359909	0.425422	0.357021	0.372454	0.612621	0.442198	0.304595	0.358847	0.423738	0.383587	0.226921	0.336339	0.183287	0.453002	0.357384	0.177953
BRD-K83302049	protopine	18	0.294388	0.444001	0.553682	0.428421	0.353858	0.425681	0.385041	0.789301	0.731789	0.317565	0.620005	0.327791	0.474788	0.471215	0.534876	0.406692	0.403841	0.397143	0.472724	0.370225	0.299215	0.373017	0.397533	0.336825	0.340012	0.358238	0.362709	0.217373	0.279851	0.00396483	0.308337	0.388832	0.403597	0.32339	0.372475	0.611363	0.423629	0.321182	0.371387	0.433221	0.389904	0.282589	0.302866	0.116765	0.433218	0.35547	0.171439
BRD-K36055864	cycloheximide	19	0.231784	0.278167	0.526916	0.574504	0.549985	0.418831	0.435296	0.769084	0.765348	0.0668596	0.790786	0.287557	0.291046	0.346321	0.432103	0.297972	0.386832	0.4804	0.712162	0.296418	0.2339	0.303763	0.34885	0.228024	0.337262	0.243623	0.358845	0.0030361	0.227727	9.6978e-05	0.326343	0.407143	0.496923	0.285152	0.285739	0.744434	0.466919	0.207522	0.21258	0.320213	0.452805	0.0939107	0.244031	0.0136058	0.625624	0.157957	0.0887052
BRD-A13084692	troglitazone	19	0.247975	0.394565	0.645365	0.509559	0.509878	0.466158	0.47912	0.774747	0.327642	0.274561	0.718095	0.501883	0.402844	0.337344	0.337552	0.344536	0.403119	0.356639	0.587658	0.319547	0.228928	0.328875	0.294155	0.217888	0.308253	0.2986	0.305542	0.184721	0.283981	0.000241906	0.241472	0.309488	0.457257	0.35931	0.44911	0.658429	0.338083	0.286888	0.278172	0.398879	0.521055	0.288529	0.237196	0.150571	0.626667	0.235144	0.0954889
BRD-K14536225	piceid	19	0.281777	0.396745	0.540559	0.39853	0.342703	0.38638	0.381119	0.802111	0.74803	0.251517	0.64571	0.304235	0.378811	0.449096	0.505326	0.389809	0.403702	0.387468	0.44807	0.349473	0.269266	0.348659	0.371161	0.302356	0.309644	0.350077	0.354961	0.162702	0.282027	0.000370849	0.298859	0.350038	0.415834	0.318058	0.358169	0.613594	0.387786	0.314765	0.35266	0.412968	0.3691	0.196478	0.305579	0.118392	0.461522	0.33091	0.161894
BRD-A54236247	racephedrine	19	0.285003	0.367251	0.551837	0.392174	0.37811	0.408991	0.400137	0.768007	0.431566	0.284529	0.518231	0.286276	0.32789	0.360217	0.531513	0.378251	0.405321	0.394801	0.51408	0.351581	0.299696	0.364876	0.394287	0.334553	0.3084	0.351392	0.363115	0.202692	0.30314	0.00164543	0.354536	0.39053	0.400676	0.306957	0.349818	0.621412	0.383529	0.307935	0.377817	0.424705	0.360888	0.275233	0.324144	0.137521	0.426421	0.382749	0.238621
BRD-A02367930	ethinyl-estradiol	19	0.285764	0.37055	0.495802	0.390427	0.298057	0.390805	0.390114	0.750801	0.653703	0.277313	0.551666	0.295265	0.38573	0.384974	0.49562	0.356214	0.401074	0.394851	0.380359	0.341697	0.266356	0.340546	0.359631	0.318802	0.299927	0.343764	0.357712	0.188907	0.276976	0.00787161	0.295866	0.36858	0.414598	0.30953	0.348494	0.60758	0.380666	0.318381	0.366001	0.412671	0.355472	0.256376	0.289192	0.124551	0.435982	0.366077	0.274876
BRD-A08709697	heliotrine	19	0.286651	0.432725	0.573137	0.422698	0.356727	0.426177	0.405142	0.804295	0.726271	0.290685	0.607947	0.315796	0.417522	0.4065	0.515482	0.395533	0.403142	0.409138	0.485476	0.357603	0.285077	0.361999	0.383266	0.312404	0.328782	0.349726	0.35349	0.198079	0.294968	0.00353887	0.324331	0.366388	0.410436	0.327067	0.366939	0.639184	0.427104	0.320281	0.367574	0.434099	0.378471	0.25498	0.290688	0.117072	0.468082	0.311975	0.163011
BRD-K07212038	selinidin	19	0.28893	0.327117	0.446425	0.381412	0.427434	0.394988	0.346987	0.813957	0.784698	0.235941	0.488921	0.271937	0.375369	0.404258	0.485316	0.36726	0.398512	0.376503	0.454127	0.357919	0.364937	0.354156	0.364469	0.375794	0.31086	0.34308	0.35376	0.209946	0.307877	3.21588e-05	0.323553	0.420374	0.388366	0.325281	0.348758	0.574034	0.379009	0.295731	0.360089	0.393432	0.366094	0.183143	0.29439	0.0881952	0.449884	0.315598	0.334898
BRD-K18135438	chenodeoxycholic-acid	19	0.289325	0.317072	0.48249	0.460664	0.452453	0.429148	0.318285	0.787643	0.710745	0.291027	0.577264	0.38527	0.353811	0.391755	0.394789	0.458344	0.395467	0.405131	0.549596	0.390292	0.317524	0.400741	0.39545	0.302502	0.288473	0.379134	0.364894	0.253254	0.32557	0.00154271	0.344671	0.349918	0.422308	0.348173	0.40296	0.555645	0.430879	0.316667	0.340548	0.426537	0.468604	0.389134	0.402772	0.217775	0.484252	0.349672	0.19991
BRD-K88849294	lobaric-acid	19	0.290186	0.429621	0.551561	0.398241	0.38053	0.404312	0.388223	0.808131	0.748851	0.254504	0.584843	0.320636	0.416866	0.437395	0.523156	0.409409	0.40191	0.405303	0.453771	0.346805	0.297476	0.351563	0.378595	0.316819	0.310959	0.361995	0.361463	0.191559	0.295131	0.0026634	0.309019	0.380115	0.408081	0.323235	0.358458	0.651636	0.420208	0.314991	0.358419	0.423097	0.380155	0.244882	0.295794	0.112665	0.433908	0.333284	0.202316
BRD-A78303415	hyoscyamine	19	0.29055	0.424536	0.558133	0.413379	0.353153	0.40936	0.413841	0.802853	0.751177	0.275026	0.559425	0.31311	0.390813	0.438565	0.521085	0.410698	0.403694	0.403673	0.485018	0.354699	0.287539	0.359475	0.402679	0.294767	0.343022	0.353154	0.359999	0.159958	0.324391	0.00181366	0.315877	0.37157	0.407179	0.331645	0.35683	0.674438	0.415882	0.337251	0.369772	0.430193	0.369326	0.259336	0.328661	0.13183	0.42953	0.302517	0.208261
BRD-K59946561	BRD-K59946561	19	0.293361	0.346755	0.487442	0.457919	0.454383	0.450351	0.318912	0.786011	0.729709	0.309955	0.542412	0.374546	0.427896	0.416078	0.399968	0.441886	0.397199	0.41219	0.526706	0.395627	0.338732	0.409216	0.399575	0.310618	0.297013	0.370148	0.368515	0.267488	0.352498	0.00235159	0.348391	0.345555	0.401807	0.362467	0.408236	0.569087	0.438854	0.302099	0.34762	0.425193	0.443561	0.413769	0.412521	0.283049	0.490172	0.362514	0.143006
BRD-K33396764	alpha-linolenic-acid	19	0.293918	0.36329	0.470599	0.406252	0.411318	0.408445	0.35968	0.790539	0.772764	0.274452	0.522553	0.294526	0.409069	0.432238	0.418947	0.383013	0.403208	0.388118	0.433663	0.356502	0.325527	0.375604	0.357667	0.390938	0.308542	0.359432	0.369962	0.204375	0.295575	0.0138273	0.329667	0.40214	0.410126	0.341529	0.359489	0.644857	0.380848	0.300262	0.358796	0.403412	0.403891	0.250555	0.327667	0.125858	0.468897	0.322004	0.287159
BRD-K09602097	forskolin	19	0.29524	0.416517	0.513169	0.421715	0.465899	0.436405	0.421922	0.78562	0.808874	0.288198	0.647298	0.306388	0.471716	0.404686	0.442682	0.446999	0.410322	0.371174	0.52671	0.35462	0.369759	0.387763	0.386559	0.303092	0.347201	0.328554	0.33494	0.17653	0.320627	0.00432208	0.338842	0.418443	0.417651	0.378011	0.373792	0.529857	0.443761	0.323163	0.382042	0.409209	0.409631	0.220324	0.376193	0.0867777	0.499133	0.374159	0.29738
BRD-K30197592	5-methoxytryptamine	19	0.296314	0.396077	0.492258	0.437102	0.520148	0.448867	0.385875	0.819841	0.755966	0.29775	0.638049	0.332208	0.426342	0.435633	0.447425	0.464938	0.409108	0.382032	0.565694	0.361809	0.345054	0.37495	0.423617	0.349638	0.317484	0.364104	0.376769	0.20207	0.285665	0.0144398	0.333458	0.424883	0.416707	0.390055	0.382004	0.688985	0.396626	0.306367	0.364099	0.421661	0.415747	0.192285	0.352153	0.102915	0.493851	0.309491	0.188699
BRD-K43880410	pregnenolone	19	0.296524	0.345006	0.501658	0.477776	0.406671	0.45034	0.333863	0.800009	0.744423	0.304498	0.592332	0.37433	0.408786	0.419755	0.378312	0.438333	0.394852	0.411714	0.538959	0.399791	0.34714	0.401372	0.419384	0.300758	0.308653	0.374146	0.380855	0.247287	0.346498	0.00779072	0.350131	0.369824	0.39782	0.357053	0.433808	0.589054	0.431032	0.302763	0.340001	0.426461	0.452117	0.416518	0.415476	0.222177	0.499157	0.389896	0.169476
BRD-K09668667	benzo(a)pyrene	19	0.297579	0.400739	0.538278	0.456611	0.452179	0.437782	0.387427	0.857474	0.788184	0.227395	0.580061	0.306537	0.392735	0.447699	0.472706	0.470967	0.393602	0.399268	0.492856	0.371827	0.336121	0.381809	0.398395	0.345286	0.351609	0.380166	0.388714	0.162416	0.350956	0.000160291	0.342601	0.485093	0.430653	0.363993	0.401784	0.729721	0.41519	0.280273	0.36817	0.42392	0.387346	0.179373	0.37429	0.14422	0.490481	0.296935	0.26738
BRD-K87991767	umbelliferone	19	0.298818	0.358941	0.486033	0.438045	0.430758	0.420886	0.350664	0.821142	0.7719	0.293081	0.472118	0.286833	0.388214	0.408102	0.441347	0.39117	0.399001	0.408091	0.427476	0.363493	0.325051	0.370527	0.342994	0.399332	0.30512	0.367634	0.379601	0.218381	0.322837	0.00193461	0.336697	0.427912	0.403492	0.337699	0.364879	0.606776	0.411426	0.311408	0.36041	0.415104	0.364768	0.223081	0.321958	0.147046	0.411907	0.305304	0.215778
BRD-K86465814	HO-013	19	0.299991	0.340875	0.466208	0.477224	0.424806	0.440364	0.315336	0.809859	0.699837	0.317776	0.588326	0.387347	0.437944	0.457949	0.373594	0.444308	0.395487	0.416584	0.562973	0.407531	0.351887	0.405361	0.39516	0.313866	0.304605	0.392962	0.378576	0.268438	0.356715	0.00839447	0.348503	0.366102	0.413028	0.362434	0.421018	0.618272	0.425348	0.319329	0.342863	0.413466	0.481031	0.449389	0.412089	0.26237	0.465197	0.34744	0.197351
BRD-A57089740	peruvoside	20	0.164375	0.528075	0.528091	0.660449	0.520987	0.446958	0.577638	0.694428	0.357779	0.0455406	0.485836	0.165659	0.509668	0.387156	0.304861	0.156631	0.405984	0.351537	0.534074	0.221339	0.0137033	0.126551	0.152802	0.0921932	0.488595	0.206657	0.148572	0.266584	0.107873	2.39547e-07	0.171352	0.336482	0.523746	0.202521	0.179413	0.7478	0.139166	0.349008	0.180755	0.311993	0.076648	0.14978	0.0433795	0.00423962	0.440537	0.0158568	6.24276e-07
BRD-A39268308	epibatidine	20	0.285779	0.390124	0.544102	0.382845	0.308651	0.389687	0.370209	0.779122	0.719159	0.265222	0.500946	0.306754	0.384951	0.393872	0.523103	0.369913	0.399599	0.416188	0.438406	0.361325	0.285477	0.355735	0.356758	0.319051	0.304417	0.35335	0.35529	0.192126	0.321016	0.000975928	0.304027	0.368016	0.420394	0.322156	0.351934	0.580636	0.412429	0.309053	0.350887	0.427826	0.369526	0.286275	0.322978	0.131141	0.390593	0.341967	0.157399
BRD-K40227168	vinburnine	20	0.287115	0.445777	0.531113	0.399175	0.341606	0.391011	0.374225	0.796333	0.737802	0.273155	0.59128	0.302306	0.394613	0.394942	0.520958	0.371657	0.399624	0.402082	0.423529	0.350507	0.294647	0.344778	0.373219	0.306147	0.303034	0.355106	0.359047	0.153197	0.28587	0.0012077	0.308538	0.372594	0.40223	0.309717	0.354024	0.630402	0.402786	0.317685	0.362537	0.413675	0.367882	0.276167	0.285927	0.158213	0.451755	0.277498	0.214078
BRD-A71203467	l-stepholidine	20	0.287547	0.422291	0.55947	0.42839	0.357824	0.406965	0.423635	0.774369	0.718758	0.270559	0.634708	0.318606	0.43319	0.456614	0.509105	0.40801	0.402702	0.408719	0.47286	0.361418	0.264145	0.367017	0.399497	0.302339	0.318009	0.36531	0.362157	0.233845	0.281283	0.00326298	0.309173	0.382459	0.419327	0.330147	0.360928	0.613395	0.413741	0.314546	0.373195	0.4342	0.384268	0.258992	0.32573	0.131331	0.467004	0.331741	0.198847
BRD-A60583491	nitrarine	20	0.287863	0.435301	0.571866	0.411098	0.345198	0.391699	0.391541	0.794027	0.763659	0.262019	0.584195	0.309487	0.405818	0.422781	0.534666	0.401459	0.402035	0.405092	0.411148	0.360542	0.293004	0.347143	0.368792	0.309891	0.328438	0.363809	0.361821	0.179201	0.283033	0.00106473	0.30832	0.388998	0.41522	0.32382	0.364223	0.685654	0.410219	0.297423	0.360441	0.424653	0.365432	0.240533	0.287818	0.104693	0.453921	0.341673	0.1366
BRD-K08973992	linoleic-acid	20	0.288827	0.39786	0.541126	0.400542	0.317288	0.396426	0.369401	0.753542	0.731305	0.279023	0.552474	0.321059	0.384587	0.412136	0.508736	0.386745	0.40029	0.406479	0.45445	0.351592	0.298256	0.359756	0.369056	0.354781	0.299005	0.353208	0.35226	0.162389	0.289861	0.000722248	0.309748	0.36633	0.414951	0.33476	0.351606	0.577448	0.410074	0.303616	0.360823	0.422345	0.376892	0.257872	0.315627	0.159332	0.46538	0.320667	0.193461
BRD-K61269089	daphnetin	20	0.290219	0.415327	0.556456	0.40513	0.415975	0.396678	0.421185	0.791607	0.725236	0.266455	0.553997	0.323634	0.395136	0.442136	0.530544	0.401469	0.4042	0.417476	0.466275	0.364499	0.29731	0.358369	0.371266	0.31635	0.308303	0.361572	0.376083	0.189706	0.296524	0.00449612	0.330854	0.382625	0.422391	0.323999	0.358876	0.63978	0.408052	0.332698	0.357047	0.42407	0.382188	0.238083	0.324184	0.156834	0.450513	0.35221	0.160823
BRD-K27871032	lysergol	20	0.290955	0.367725	0.507886	0.410507	0.441957	0.413019	0.380322	0.871613	0.771085	0.287798	0.496468	0.293235	0.411521	0.404522	0.440714	0.387854	0.404018	0.376021	0.48165	0.363601	0.349537	0.362385	0.36313	0.383759	0.336758	0.372818	0.368526	0.198148	0.334144	0.0012978	0.320942	0.435446	0.399123	0.359363	0.356215	0.64739	0.406385	0.32007	0.372255	0.401504	0.372875	0.152113	0.294191	0.129213	0.469509	0.301206	0.194153
BRD-K40213712	SAL-1	20	0.290979	0.332736	0.494389	0.424388	0.368984	0.399582	0.359056	0.717514	0.626776	0.236207	0.514173	0.305502	0.29912	0.389246	0.426658	0.361203	0.40012	0.405008	0.416811	0.353416	0.303463	0.360191	0.34119	0.334738	0.290363	0.350484	0.361391	0.190357	0.284103	0.00258907	0.296622	0.347542	0.425393	0.323398	0.36133	0.522697	0.408065	0.278205	0.346722	0.408539	0.365058	0.262963	0.331847	0.13236	0.420592	0.371682	0.184897
BRD-K59163477	cisapride	20	0.291362	0.409912	0.54815	0.401942	0.338671	0.408474	0.373085	0.840242	0.761978	0.280144	0.56905	0.307523	0.429413	0.434947	0.492131	0.417582	0.403415	0.397947	0.475631	0.36034	0.317221	0.373238	0.407123	0.336225	0.329973	0.363341	0.352665	0.203975	0.300451	0.00336633	0.321174	0.384588	0.4191	0.354367	0.373942	0.70742	0.401524	0.312985	0.362971	0.43432	0.388393	0.243712	0.331882	0.123	0.474709	0.373084	0.19448
BRD-K46068882	eugenitol	20	0.291717	0.380128	0.494865	0.418842	0.447365	0.404745	0.371255	0.829288	0.739309	0.301008	0.622053	0.296264	0.421499	0.410447	0.416371	0.404126	0.404576	0.37752	0.47619	0.353587	0.348206	0.377476	0.347945	0.374321	0.298405	0.35277	0.362773	0.141648	0.319033	0.00288489	0.328508	0.425993	0.414451	0.343147	0.358384	0.655298	0.403504	0.333047	0.366211	0.416895	0.38662	0.190123	0.328654	0.0761755	0.441843	0.324415	0.218135
BRD-K71003802	hippeastrine	20	0.291852	0.400567	0.483464	0.42464	0.435876	0.423179	0.374959	0.816456	0.775294	0.285797	0.538031	0.311363	0.362368	0.441137	0.454636	0.40042	0.408266	0.39695	0.447683	0.360896	0.315155	0.37377	0.357723	0.389275	0.293874	0.361237	0.37962	0.151685	0.28725	0.0029225	0.347045	0.410336	0.410924	0.349125	0.366207	0.627824	0.419701	0.314505	0.364176	0.412105	0.40959	0.207597	0.347057	0.0975152	0.476429	0.280131	0.193441
BRD-K68144790	glycodeoxycholic-acid	20	0.292732	0.34279	0.499539	0.463624	0.440574	0.455866	0.327945	0.792105	0.725461	0.319563	0.619229	0.374322	0.418912	0.414456	0.391243	0.458576	0.394392	0.416366	0.510721	0.394935	0.332843	0.405385	0.398593	0.31132	0.294055	0.391884	0.368759	0.265375	0.335255	0.00167744	0.366982	0.356584	0.408706	0.366849	0.410861	0.602478	0.425126	0.327552	0.343657	0.427223	0.448304	0.3545	0.406968	0.236399	0.486105	0.364974	0.177349
BRD-A10969569	ambelline	20	0.293902	0.420749	0.559294	0.417064	0.403895	0.422344	0.377647	0.794214	0.756117	0.301186	0.604382	0.316092	0.425065	0.406955	0.524422	0.378716	0.405559	0.410401	0.476103	0.368604	0.298413	0.368174	0.391268	0.319394	0.316448	0.358845	0.365738	0.168203	0.290973	0.00379491	0.336711	0.383208	0.401842	0.340329	0.37077	0.615027	0.426804	0.323794	0.363003	0.433103	0.37432	0.266553	0.319399	0.116672	0.488785	0.358311	0.184236
BRD-A34907681	rutin	20	0.295199	0.363344	0.496703	0.406637	0.439511	0.403813	0.358913	0.865721	0.775383	0.288496	0.591106	0.283407	0.451162	0.405578	0.46064	0.383969	0.403648	0.388816	0.448168	0.359456	0.342207	0.368446	0.344946	0.381991	0.315878	0.362989	0.361319	0.194763	0.338055	0.000248833	0.321833	0.42848	0.401791	0.34128	0.357254	0.666334	0.411299	0.304631	0.369455	0.410305	0.369834	0.216674	0.322426	0.0987663	0.497378	0.30055	0.254293
BRD-K92683369	graveoline	20	0.295692	0.391578	0.498382	0.413753	0.394989	0.41966	0.352496	0.82554	0.769833	0.30165	0.521115	0.296236	0.394946	0.419985	0.416887	0.39432	0.401616	0.397351	0.433349	0.367434	0.322303	0.375746	0.358327	0.363288	0.301119	0.362231	0.372013	0.173708	0.326393	0.0308153	0.311285	0.428364	0.410169	0.336683	0.38286	0.627173	0.406223	0.318762	0.362497	0.404294	0.377323	0.208078	0.347435	0.144567	0.474	0.3334	0.196788
BRD-A78295502	hydroquinine	20	0.29627	0.47725	0.582828	0.41712	0.362429	0.417704	0.420438	0.809864	0.772951	0.311748	0.463669	0.323805	0.470906	0.446342	0.528299	0.43606	0.404573	0.407285	0.494649	0.358716	0.29382	0.357542	0.361955	0.322445	0.32978	0.379522	0.368817	0.228778	0.297462	0.000559315	0.308998	0.394504	0.420873	0.34608	0.358839	0.686183	0.401871	0.33287	0.361766	0.426974	0.383807	0.243147	0.31182	0.161594	0.388871	0.329853	0.174614
BRD-K45988865	tetramethylsilane	20	0.297056	0.372756	0.462134	0.399629	0.419437	0.42088	0.326995	0.854722	0.761768	0.295605	0.479133	0.288345	0.388609	0.385833	0.44419	0.39267	0.399493	0.402937	0.409904	0.361514	0.318848	0.378099	0.349665	0.393296	0.29766	0.360218	0.382545	0.262255	0.313627	0.00743967	0.335273	0.406483	0.397086	0.329009	0.366962	0.619954	0.399602	0.338927	0.359931	0.411641	0.36816	0.283275	0.335188	0.162343	0.41257	0.306311	0.243543
BRD-K80738081	resveratrol	20	0.301348	0.367105	0.618777	0.545876	0.47326	0.437754	0.438187	0.83242	0.800411	0.313234	0.721235	0.435386	0.417849	0.512835	0.450361	0.472138	0.407085	0.470815	0.566924	0.444938	0.347613	0.408058	0.404863	0.311716	0.360118	0.371956	0.390681	0.163644	0.369389	0.00275585	0.32298	0.384252	0.417028	0.408033	0.484234	0.6694	0.474299	0.333531	0.350743	0.446043	0.435412	0.373225	0.365887	0.18449	0.635518	0.318315	0.189978
BRD-K02953697	naringin	21	0.285632	0.42873	0.547839	0.405759	0.3393	0.395811	0.386054	0.743249	0.756945	0.262267	0.584734	0.314164	0.405242	0.439711	0.521748	0.412595	0.400283	0.40466	0.407411	0.361664	0.296223	0.351752	0.367148	0.320281	0.301026	0.359572	0.367153	0.143984	0.277719	0.00156689	0.311713	0.378193	0.424631	0.32167	0.35495	0.62458	0.402346	0.299927	0.358291	0.423463	0.371696	0.228518	0.305257	0.170505	0.450789	0.324152	0.164515
BRD-A98431941	ephedrine	21	0.286847	0.412853	0.524509	0.383879	0.343123	0.408884	0.374071	0.750508	0.704176	0.281691	0.56267	0.308437	0.391368	0.420251	0.522859	0.396981	0.403018	0.398413	0.456841	0.345741	0.277597	0.360375	0.371816	0.32624	0.308561	0.358017	0.347735	0.125135	0.312055	0.00232104	0.298813	0.356385	0.414235	0.30875	0.351491	0.616393	0.397022	0.328031	0.354684	0.42351	0.377997	0.25367	0.34477	0.151601	0.418936	0.357321	0.153199
BRD-A04172077	BRD-A04172077	21	0.289914	0.340145	0.524466	0.531159	0.463211	0.430746	0.338538	0.75764	0.701704	0.261108	0.584236	0.386903	0.311908	0.472051	0.402078	0.417224	0.402836	0.396872	0.531778	0.388552	0.316194	0.427664	0.409755	0.32601	0.333234	0.340677	0.361668	0.239288	0.356619	0.00209058	0.412813	0.380966	0.406973	0.36723	0.452296	0.533489	0.468082	0.257838	0.346944	0.450807	0.47354	0.290953	0.449261	0.138837	0.508743	0.288236	0.129486
BRD-A15034104	bergenin	21	0.290292	0.391491	0.511179	0.390255	0.348881	0.402899	0.371088	0.797566	0.703459	0.287518	0.562947	0.313799	0.401095	0.40178	0.500652	0.372702	0.40191	0.405007	0.424654	0.349021	0.295296	0.354811	0.371577	0.344575	0.302855	0.346623	0.349853	0.183817	0.288038	0.00531467	0.316079	0.365762	0.413529	0.336053	0.351002	0.604427	0.416936	0.326467	0.362059	0.412758	0.378161	0.234415	0.338999	0.1664	0.410995	0.345387	0.276623
BRD-K42142750	retrorsine	21	0.290854	0.440816	0.560841	0.416832	0.347488	0.405035	0.417058	0.775926	0.741431	0.26985	0.659321	0.314103	0.45453	0.476539	0.540407	0.401659	0.405745	0.39995	0.492155	0.36099	0.27754	0.358806	0.38943	0.296137	0.313295	0.344881	0.366319	0.165909	0.285533	0.00111941	0.320182	0.383828	0.400054	0.315975	0.370726	0.607964	0.413314	0.313589	0.369382	0.435084	0.376894	0.260189	0.312325	0.117768	0.518453	0.358302	0.232396
BRD-K94841585	emodic-acid	21	0.292343	0.343633	0.522803	0.480823	0.447495	0.413877	0.406333	0.873094	0.772676	0.257424	0.615499	0.308107	0.346784	0.464231	0.478634	0.433448	0.401449	0.40168	0.457427	0.405154	0.267195	0.400787	0.358444	0.363938	0.328214	0.367454	0.38689	0.153353	0.303325	0.0179753	0.349753	0.440025	0.414951	0.34985	0.434037	0.680307	0.472377	0.31893	0.355137	0.403217	0.4483	0.216449	0.348841	0.0917615	0.507906	0.273511	0.209056
BRD-K72034655	peucedanin	21	0.293384	0.363372	0.478783	0.37324	0.365733	0.402095	0.307468	0.825557	0.701832	0.260351	0.423371	0.276677	0.34675	0.355228	0.444949	0.364736	0.394995	0.357561	0.452533	0.334965	0.329552	0.358146	0.347156	0.425451	0.307849	0.361635	0.344283	0.225831	0.333094	0.000237442	0.312586	0.397002	0.413686	0.301803	0.352522	0.611354	0.372613	0.275834	0.363403	0.411588	0.353143	0.247302	0.303567	0.141679	0.38971	0.312266	0.280459
BRD-A04327189	synephrine	21	0.293486	0.396402	0.504265	0.419766	0.441231	0.435705	0.38028	0.801271	0.788261	0.250948	0.587949	0.332444	0.412289	0.446614	0.43858	0.481867	0.406662	0.384403	0.56207	0.349242	0.31661	0.376884	0.438747	0.344588	0.313103	0.340734	0.371644	0.20279	0.318507	0.00725466	0.346056	0.371532	0.427848	0.377015	0.387057	0.663795	0.378502	0.274383	0.359206	0.418863	0.409639	0.221021	0.393427	0.132532	0.488748	0.380113	0.235832
BRD-K69556541	ryanodine	21	0.293803	0.366417	0.519249	0.391997	0.420097	0.395719	0.363765	0.822777	0.754004	0.261407	0.592501	0.271904	0.435378	0.421608	0.457182	0.409124	0.402362	0.38921	0.471728	0.352279	0.349235	0.364117	0.370685	0.363188	0.299573	0.354333	0.365787	0.159814	0.328883	0.000492657	0.323636	0.43163	0.398873	0.343268	0.353612	0.632128	0.399153	0.307699	0.36199	0.420389	0.359928	0.167872	0.299224	0.106542	0.481386	0.318038	0.25246
BRD-K43164539	cholic-acid	21	0.294475	0.341516	0.492448	0.458156	0.432114	0.429263	0.312144	0.800907	0.744811	0.315893	0.577401	0.347823	0.386264	0.40622	0.385155	0.463571	0.393053	0.420238	0.526486	0.385515	0.326637	0.389804	0.383229	0.335341	0.274464	0.393589	0.375339	0.229537	0.340406	0.00398879	0.352345	0.354148	0.412047	0.35623	0.406084	0.622208	0.417173	0.313888	0.341829	0.421564	0.428685	0.311079	0.390808	0.194315	0.458093	0.39425	0.15352
BRD-K89923877	scopolamine	21	0.299356	0.386524	0.479475	0.390567	0.412277	0.417037	0.35774	0.862925	0.776909	0.285599	0.52571	0.283246	0.406912	0.421317	0.44068	0.43245	0.402387	0.394294	0.433917	0.359345	0.33777	0.377426	0.374481	0.398905	0.318	0.373342	0.372285	0.242571	0.340616	0.0046542	0.343262	0.41286	0.414707	0.342544	0.358345	0.662007	0.400928	0.314448	0.363271	0.413669	0.382531	0.198023	0.338158	0.143662	0.434901	0.331154	0.216892
BRD-K87049188	fusaric-acid	21	0.299441	0.372474	0.491373	0.414461	0.373879	0.410096	0.352594	0.836419	0.817188	0.272624	0.517822	0.279293	0.372796	0.398437	0.430593	0.374873	0.401063	0.388318	0.428052	0.364369	0.322801	0.363341	0.364331	0.394775	0.310844	0.380817	0.380086	0.214876	0.306211	0.00995053	0.33712	0.423615	0.411078	0.350093	0.361967	0.59588	0.396263	0.315742	0.363128	0.408892	0.374353	0.217369	0.332668	0.146039	0.44299	0.333636	0.266373
BRD-A63998256	helveticoside	22	0.262454	0.573827	0.642007	0.587733	0.392898	0.473636	0.46358	0.904792	0.891374	0.255101	0.769849	0.339146	0.526052	0.402326	0.543723	0.305987	0.401414	0.432781	0.665377	0.365484	0.211281	0.313339	0.356304	0.225697	0.440853	0.300084	0.375888	0.0619852	0.231276	0.00722078	0.25154	0.489812	0.470795	0.287903	0.356718	0.802837	0.429347	0.301174	0.305117	0.390663	0.377447	0.174035	0.263664	0.0529829	0.681706	0.16343	0.0536537
BRD-K74112339	acetohydroxamic-acid	22	0.283204	0.352244	0.496301	0.372142	0.375515	0.379361	0.319012	0.839779	0.744933	0.267034	0.432594	0.272525	0.346695	0.380095	0.460017	0.376244	0.392989	0.370089	0.380824	0.335308	0.317891	0.356615	0.338873	0.373043	0.294336	0.366145	0.353149	0.192815	0.336366	0.000565678	0.306586	0.407722	0.408915	0.310219	0.355767	0.659041	0.371673	0.277594	0.365302	0.416637	0.359028	0.16794	0.296398	0.0881955	0.430655	0.288797	0.143759
BRD-A44448661	pentobarbital	22	0.285591	0.361671	0.487584	0.388319	0.346656	0.407101	0.365582	0.824244	0.72387	0.228501	0.516831	0.315507	0.276036	0.323093	0.444067	0.387394	0.403563	0.412481	0.323265	0.34814	0.262413	0.355262	0.337368	0.309137	0.325173	0.341463	0.353178	0.129845	0.254762	0.00309226	0.319126	0.364146	0.418165	0.337355	0.355851	0.637231	0.412263	0.314691	0.354494	0.410967	0.387941	0.182718	0.300148	0.11239	0.427777	0.343551	0.168968
BRD-A18620900	estriol	22	0.287239	0.393358	0.498413	0.385683	0.305817	0.384832	0.379462	0.735083	0.686415	0.262353	0.575179	0.300284	0.35429	0.412926	0.487301	0.360202	0.402311	0.414676	0.465321	0.345728	0.273648	0.352022	0.378645	0.350399	0.31562	0.357811	0.368279	0.197069	0.285927	0.00414866	0.307995	0.372741	0.418309	0.337587	0.347532	0.562362	0.402083	0.31566	0.355919	0.411918	0.368979	0.205575	0.298557	0.114648	0.459671	0.360951	0.189232
BRD-K29178788	dictamnine	22	0.287877	0.369825	0.468255	0.367412	0.359184	0.375661	0.341061	0.827157	0.767169	0.23323	0.503297	0.247316	0.376231	0.378557	0.450477	0.373688	0.395394	0.381151	0.386482	0.35068	0.311928	0.340529	0.358037	0.358865	0.288779	0.373654	0.36497	0.156476	0.316046	0.000192967	0.319545	0.419669	0.404437	0.329491	0.337021	0.600718	0.378267	0.307036	0.358828	0.39415	0.34396	0.180557	0.272363	0.0946539	0.371304	0.317017	0.323954
BRD-A42831637	tetrahydrocannabinol-7-oic-acid	22	0.291053	0.403805	0.522011	0.385181	0.346793	0.394535	0.382856	0.767838	0.734782	0.261811	0.548891	0.311456	0.371336	0.393706	0.518161	0.368125	0.402924	0.413198	0.425106	0.352307	0.285704	0.355546	0.358848	0.320719	0.335057	0.359174	0.354021	0.205768	0.286978	0.0123565	0.304454	0.362194	0.417908	0.332497	0.34986	0.639417	0.423161	0.343276	0.355357	0.426411	0.374649	0.199633	0.313586	0.12542	0.423503	0.326791	0.171602
BRD-K15842202	eudesmic-acid	22	0.291256	0.379917	0.535368	0.382771	0.36061	0.392464	0.363162	0.864432	0.746893	0.274215	0.531027	0.26079	0.399379	0.437551	0.512578	0.399347	0.397872	0.365664	0.442202	0.342226	0.312115	0.360298	0.342629	0.39006	0.310788	0.3698	0.365934	0.168325	0.317462	0.000214876	0.30779	0.430285	0.400874	0.301432	0.362851	0.723675	0.368339	0.276928	0.370771	0.404212	0.350508	0.146216	0.284347	0.0943244	0.404766	0.31553	0.22937
BRD-A76279427	myriocin	22	0.291299	0.432915	0.65939	0.480148	0.468553	0.407677	0.467655	0.855922	0.791489	0.357129	0.734645	0.400025	0.390611	0.497415	0.536192	0.423923	0.419598	0.447374	0.542625	0.392256	0.35537	0.350683	0.363145	0.267136	0.358069	0.340008	0.387742	0.0629128	0.348168	0.000557371	0.278747	0.393558	0.398796	0.365513	0.38643	0.680673	0.480077	0.335442	0.346985	0.440006	0.40918	0.318661	0.305492	0.164535	0.648875	0.284562	0.16888
BRD-K76133116	benzydamine	22	0.292402	0.363677	0.520066	0.399442	0.431627	0.417401	0.370792	0.834416	0.749412	0.266758	0.580975	0.280122	0.443054	0.407365	0.441263	0.391739	0.4044	0.374509	0.423262	0.354901	0.350671	0.372284	0.356837	0.379995	0.309079	0.361229	0.371188	0.199242	0.327133	0.000461574	0.322348	0.424732	0.39612	0.35546	0.357427	0.648296	0.399931	0.299985	0.367089	0.407786	0.374632	0.151603	0.305102	0.120428	0.492816	0.294494	0.25906
BRD-A43150328	penicillic-acid	22	0.292757	0.513026	0.577444	0.417386	0.377969	0.437891	0.444563	0.79975	0.76082	0.271218	0.471153	0.324146	0.438811	0.497634	0.536094	0.430156	0.405151	0.398816	0.494865	0.362385	0.282235	0.366986	0.358125	0.366	0.313808	0.397677	0.374022	0.220324	0.334066	0.00179225	0.297917	0.41466	0.427675	0.364279	0.384278	0.657768	0.388336	0.304216	0.368267	0.41378	0.392907	0.219065	0.329639	0.139119	0.329333	0.304711	0.110241
BRD-K36638830	anabasine	22	0.293913	0.388756	0.555332	0.451502	0.45921	0.438672	0.393678	0.859205	0.727454	0.300506	0.679316	0.310687	0.443734	0.448305	0.459816	0.423133	0.406545	0.401548	0.50159	0.363209	0.356363	0.377368	0.401201	0.340089	0.310302	0.357605	0.365803	0.116666	0.325685	0.00557539	0.328191	0.437029	0.41588	0.372604	0.3722	0.67994	0.422997	0.306615	0.372784	0.409058	0.403218	0.149678	0.316733	0.116719	0.485519	0.287817	0.218484
BRD-K47192521	icosapent	22	0.294737	0.393508	0.548816	0.430917	0.360766	0.423743	0.380676	0.789846	0.706222	0.28113	0.625296	0.367585	0.446493	0.406679	0.45629	0.407661	0.396035	0.446231	0.43802	0.389523	0.315105	0.385882	0.37605	0.31079	0.301873	0.380157	0.379051	0.188098	0.295307	0.0017723	0.317966	0.356398	0.42058	0.343229	0.384709	0.628077	0.428364	0.319962	0.342545	0.417693	0.425999	0.28621	0.332933	0.180797	0.492188	0.388942	0.23557
BRD-K94689771	pinocembrin	22	0.29581	0.36389	0.476401	0.405428	0.417538	0.402653	0.355155	0.835766	0.76228	0.288599	0.523346	0.282564	0.402159	0.432298	0.435438	0.384582	0.398251	0.394384	0.408534	0.351816	0.327494	0.372886	0.356508	0.400121	0.296838	0.355043	0.36952	0.18702	0.319849	0.00243667	0.337058	0.415919	0.402126	0.329987	0.362434	0.604011	0.40593	0.306273	0.36973	0.405924	0.366793	0.239929	0.34158	0.138149	0.46819	0.311951	0.229071
BRD-K42095107	daidzein	22	0.296134	0.444176	0.56626	0.443573	0.399172	0.412623	0.416012	0.850992	0.769496	0.308764	0.634773	0.348921	0.474158	0.474459	0.539577	0.452614	0.407221	0.422489	0.54543	0.375643	0.328722	0.380254	0.420215	0.322001	0.337591	0.371372	0.375998	0.151349	0.320022	0.00140897	0.352503	0.41137	0.421185	0.367361	0.385798	0.656392	0.447755	0.347282	0.381932	0.448346	0.404314	0.249342	0.360929	0.174655	0.489056	0.325242	0.174644
BRD-A49906757	scopolamine	22	0.296971	0.355235	0.525525	0.386703	0.40572	0.400656	0.354636	0.845867	0.748088	0.278224	0.54066	0.275812	0.417667	0.429414	0.445961	0.411233	0.401926	0.404037	0.432948	0.35322	0.336394	0.363793	0.356586	0.412557	0.309809	0.379485	0.372024	0.263145	0.337151	0.00067945	0.326769	0.424045	0.408084	0.337072	0.348791	0.633744	0.391298	0.308636	0.36522	0.404375	0.355846	0.178544	0.295531	0.150417	0.459812	0.321082	0.264411
BRD-K68077509	brucine	22	0.297429	0.374043	0.42887	0.413414	0.401218	0.402735	0.355953	0.782091	0.729354	0.298437	0.588403	0.322735	0.382473	0.420742	0.440669	0.469073	0.405995	0.384587	0.508164	0.366637	0.295174	0.377294	0.426758	0.374954	0.335393	0.351521	0.371536	0.27806	0.283006	0.0227002	0.34917	0.388672	0.417416	0.366178	0.380878	0.653938	0.399474	0.331886	0.355478	0.423171	0.391878	0.283147	0.345539	0.108288	0.452442	0.327628	0.23756
BRD-K96271548	coumaric-acid	22	0.298391	0.400333	0.479851	0.430064	0.412644	0.426872	0.377948	0.858649	0.780507	0.287219	0.540135	0.300648	0.422322	0.43058	0.435543	0.401803	0.401283	0.398909	0.437021	0.375027	0.311713	0.376886	0.370615	0.388902	0.322726	0.382375	0.376436	0.175835	0.30929	0.00870834	0.338797	0.422907	0.402406	0.340874	0.378521	0.638524	0.402083	0.331706	0.375481	0.408805	0.375126	0.225676	0.323437	0.138127	0.447918	0.289263	0.229786
BRD-A49734948	foliosidine	22	0.298472	0.360085	0.513365	0.390072	0.399724	0.406775	0.355868	0.863934	0.772924	0.290272	0.532589	0.275224	0.397146	0.412372	0.441538	0.397066	0.403955	0.391654	0.436957	0.354745	0.33046	0.366692	0.36802	0.397894	0.311213	0.362396	0.370364	0.223555	0.321154	0.0011094	0.32554	0.425764	0.399446	0.342718	0.348847	0.643951	0.395589	0.289559	0.369894	0.409722	0.361974	0.16754	0.28739	0.123108	0.515406	0.280642	0.256952
BRD-A49358627	ciprofibrate	22	0.299085	0.399788	0.516361	0.411775	0.397025	0.424144	0.369479	0.85608	0.763748	0.289619	0.565141	0.298547	0.432037	0.42165	0.442069	0.407446	0.404779	0.398229	0.461305	0.359858	0.360457	0.377226	0.386366	0.38241	0.316598	0.363337	0.375468	0.235701	0.346656	0.000688183	0.344861	0.430035	0.398445	0.357064	0.373291	0.67715	0.41601	0.308543	0.368269	0.418509	0.380407	0.19235	0.337312	0.125602	0.496325	0.337226	0.241544
BRD-K24994810	androstenol	22	0.299427	0.354262	0.474476	0.45597	0.410521	0.424156	0.326734	0.799273	0.724923	0.294405	0.605575	0.359761	0.392119	0.426564	0.391421	0.44514	0.394907	0.430699	0.534835	0.39591	0.327757	0.400665	0.391852	0.323325	0.298618	0.386368	0.376463	0.301826	0.342265	0.00161345	0.351915	0.360549	0.4237	0.356971	0.413981	0.598954	0.419733	0.318867	0.34746	0.433034	0.441081	0.369189	0.397205	0.186933	0.48874	0.373477	0.170282
BRD-K92726801	hydrastinine	22	0.300512	0.362959	0.460812	0.397224	0.376986	0.408845	0.3423	0.835059	0.759835	0.298691	0.486779	0.271672	0.371361	0.3655	0.42356	0.371324	0.400012	0.393631	0.411916	0.361319	0.331482	0.3594	0.343033	0.43194	0.298557	0.37259	0.364519	0.201028	0.30755	0.00649515	0.324914	0.417845	0.413449	0.334077	0.347847	0.597744	0.403294	0.314832	0.361262	0.407724	0.361944	0.25302	0.315648	0.141517	0.413286	0.299208	0.219586
BRD-K90976994	dehydrocholic-acid	22	0.30173	0.37424	0.476069	0.430551	0.460638	0.44451	0.396922	0.800169	0.772591	0.343326	0.571276	0.337735	0.369868	0.467973	0.484069	0.483867	0.408027	0.39892	0.500875	0.356751	0.303385	0.375449	0.444082	0.328458	0.350482	0.338067	0.376533	0.219396	0.286574	0.0461076	0.339075	0.424197	0.429043	0.401972	0.382266	0.624943	0.386319	0.3027	0.365958	0.402064	0.416141	0.247094	0.362772	0.110539	0.425125	0.371641	0.328213
BRD-K24656285	farnesol	22	0.303534	0.357635	0.494727	0.481281	0.422738	0.456265	0.323807	0.795963	0.69437	0.348334	0.577391	0.382995	0.423435	0.410991	0.38681	0.467589	0.394492	0.431586	0.563508	0.401566	0.34031	0.414401	0.391863	0.324418	0.310926	0.393281	0.381707	0.325628	0.347167	0.00223139	0.360062	0.366027	0.416151	0.362255	0.424674	0.60014	0.42632	0.334289	0.348431	0.428374	0.436581	0.402423	0.428973	0.274105	0.487449	0.371415	0.206678
BRD-K49061529	BRD-K49061529	22	0.305391	0.389426	0.488178	0.433014	0.43345	0.433214	0.379448	0.859333	0.846116	0.301	0.468505	0.31076	0.434458	0.444306	0.413233	0.406383	0.407774	0.399963	0.465322	0.372559	0.343601	0.390482	0.352677	0.379244	0.328202	0.372215	0.374615	0.209331	0.296801	0.00573828	0.350148	0.418214	0.406841	0.370351	0.379434	0.68188	0.420813	0.310652	0.363008	0.410694	0.383493	0.20886	0.347652	0.111411	0.432789	0.33004	0.405516
BRD-A33746814	avicin-g	23	0.136924	0.481512	0.505818	0.439609	0.142369	0.195991	0.458152	0.656249	0.683974	0.0307162	0.529015	0.0447149	0.452524	0.528149	0.257137	0.459131	0.390739	0.0902451	0.167216	0.0306276	0.0118535	0.364594	0.390574	0.0323875	0.0586656	0.0912333	0.500357	0.565452	0.408225	0.00020397	0.0478466	0.100529	0.101511	0.0807938	0.474362	0.280122	0.0416866	0.077073	0.333939	0.0800853	0.48148	0.0346693	0.36367	0.399324	0.238753	0.0204227	0.0110758
BRD-K08486545	cymarin	23	0.146115	0.583457	0.647108	0.689861	0.546634	0.618882	0.701289	0.761688	0.52881	0.0385537	0.638713	0.144674	0.523866	0.0938546	0.396583	0.23299	0.393234	0.325473	0.832465	0.153097	0.000699322	0.0736927	0.041859	0.169597	0.597933	0.169594	0.11122	0.00647684	0.127129	1.39327e-06	0.0898455	0.471135	0.725659	0.23877	0.178024	0.757182	0.0202212	0.275671	0.145336	0.235478	0.200221	0.0122269	0.00356988	0.0011744	0.468399	0.0379255	1.42683e-05
BRD-A85860691	chaetocin	23	0.146993	0.106596	0.498693	0.405443	0.567172	0.231669	0.454619	0.584499	0.773733	0.200202	0.712908	0.136659	0.152658	0.589373	0.30561	0.218362	0.412075	0.102763	0.694288	0.199762	0.0727587	0.23078	0.117601	0.00593924	0.592721	0.0750772	0.125353	0.0764164	0.172029	3.92832e-06	0.246219	0.156198	0.275298	0.112905	0.593892	0.383396	0.625344	0.147387	0.257771	0.510982	0.623938	0.207618	0.281494	0.00120757	0.540679	0.434929	7.57244e-08
BRD-K03440695	boldine	23	0.291368	0.38268	0.509714	0.429276	0.448829	0.412161	0.375724	0.846339	0.732246	0.237497	0.649551	0.306175	0.362133	0.398834	0.433402	0.385587	0.409695	0.369271	0.495026	0.359496	0.344822	0.378806	0.38786	0.317341	0.306893	0.350971	0.367159	0.10544	0.288105	0.0112729	0.324385	0.406102	0.410912	0.365698	0.365964	0.744357	0.429523	0.296456	0.359578	0.413948	0.374512	0.178242	0.313964	0.0595085	0.491577	0.29617	0.292621
BRD-A30395175	BRD-A30395175	23	0.293383	0.405318	0.478198	0.438896	0.428549	0.433711	0.372068	0.810302	0.716702	0.315197	0.634354	0.312493	0.377732	0.423015	0.377693	0.362505	0.409753	0.401994	0.46435	0.368164	0.380955	0.384147	0.376834	0.307206	0.312238	0.363481	0.367368	0.0712416	0.28869	0.0187874	0.32056	0.433257	0.401297	0.387722	0.376253	0.692932	0.427418	0.341264	0.367352	0.401919	0.377828	0.197963	0.304708	0.116948	0.45449	0.298221	0.222042
BRD-A43849199	karakoline	23	0.294026	0.399231	0.53006	0.398399	0.34556	0.404514	0.389228	0.781129	0.728742	0.282463	0.546238	0.32566	0.398815	0.39688	0.499554	0.384117	0.401923	0.414565	0.458178	0.355028	0.275412	0.355745	0.361214	0.304746	0.323744	0.363164	0.365475	0.240513	0.270619	0.00570514	0.310803	0.372562	0.414187	0.322228	0.343471	0.626195	0.415618	0.351348	0.358671	0.412602	0.38085	0.2459	0.31448	0.139523	0.464214	0.372088	0.239109
BRD-K13642330	cosmosiin	23	0.294301	0.401407	0.527366	0.426443	0.416497	0.406799	0.389415	0.862071	0.810433	0.264792	0.563768	0.283559	0.419292	0.406634	0.487359	0.425693	0.399997	0.409188	0.468614	0.345176	0.357612	0.372803	0.376364	0.373302	0.336786	0.34262	0.369684	0.269584	0.325455	0.000194794	0.34009	0.424325	0.416498	0.344695	0.36689	0.633004	0.409237	0.289961	0.363337	0.409595	0.377281	0.210415	0.30909	0.10192	0.478843	0.305008	0.287593
BRD-A88282067	delcorine	23	0.294398	0.373879	0.479776	0.372812	0.417647	0.4031	0.357486	0.83836	0.693395	0.2801	0.526965	0.28024	0.410889	0.379287	0.457134	0.386297	0.40249	0.396152	0.385817	0.348444	0.354205	0.367518	0.359958	0.390637	0.315964	0.36768	0.365101	0.207472	0.330333	0.00279615	0.32065	0.425266	0.409771	0.343816	0.350292	0.614076	0.393346	0.303795	0.361274	0.410163	0.357594	0.17274	0.31039	0.103129	0.45145	0.318994	0.223296
BRD-K46424862	hymecromone	23	0.294429	0.425262	0.532745	0.436926	0.384568	0.407088	0.417756	0.792363	0.744239	0.244273	0.589499	0.331306	0.383661	0.431982	0.505591	0.386191	0.405272	0.404888	0.509509	0.359135	0.32424	0.374367	0.396154	0.322538	0.313087	0.346787	0.371949	0.214711	0.320364	0.00161297	0.330328	0.383251	0.415446	0.340769	0.378891	0.662628	0.419702	0.304115	0.362513	0.430198	0.39966	0.283689	0.333253	0.145213	0.467703	0.356594	0.161317
BRD-K33572481	taurodeoxycholic-acid	23	0.296014	0.338828	0.492334	0.479861	0.464472	0.450723	0.329539	0.818693	0.775119	0.289613	0.602049	0.37221	0.435367	0.421403	0.398541	0.455045	0.397186	0.422646	0.528725	0.395004	0.340407	0.409449	0.408963	0.313131	0.305292	0.385674	0.373041	0.231052	0.342351	0.000842105	0.360211	0.360304	0.410029	0.367146	0.426645	0.64361	0.442113	0.3073	0.352211	0.434134	0.449182	0.408159	0.399457	0.224067	0.475788	0.357232	0.12805
BRD-K68620903	dydrogesterone	23	0.296694	0.374492	0.513804	0.401883	0.433406	0.408982	0.371383	0.855783	0.742255	0.254786	0.551825	0.285159	0.459123	0.376983	0.442026	0.41345	0.403442	0.386069	0.439477	0.350087	0.352331	0.368484	0.352171	0.386001	0.310061	0.364659	0.365991	0.192069	0.338847	0.000454341	0.329926	0.420625	0.397088	0.343134	0.352183	0.623287	0.398925	0.298673	0.36342	0.412133	0.369341	0.191241	0.320543	0.135666	0.473199	0.325101	0.214265
BRD-A59808129	guggulsterone	23	0.297282	0.432192	0.521798	0.498405	0.470558	0.476493	0.345051	0.80861	0.788055	0.313767	0.437557	0.350902	0.389294	0.481574	0.41626	0.510507	0.398815	0.383294	0.558328	0.372165	0.296985	0.394775	0.431857	0.36204	0.314667	0.430275	0.379898	0.333246	0.357035	0.00441541	0.369087	0.407857	0.395582	0.381591	0.420387	0.617539	0.428141	0.300073	0.367807	0.427515	0.431454	0.338797	0.425292	0.314421	0.366214	0.300741	0.0463569
BRD-K49448285	bisindolylmaleimide	23	0.29814	0.475849	0.617021	0.440108	0.412497	0.425479	0.418163	0.848062	0.768893	0.300977	0.606656	0.378368	0.520017	0.496314	0.53947	0.382783	0.40708	0.38034	0.47794	0.353259	0.273859	0.376203	0.364487	0.304165	0.322995	0.361013	0.351327	0.185191	0.326608	0.00473526	0.326703	0.392809	0.43319	0.326867	0.381084	0.734499	0.402929	0.304655	0.375899	0.442257	0.38916	0.287603	0.317298	0.124348	0.50336	0.375468	0.141683
BRD-K65411918	BRD-K65411918	23	0.298184	0.342088	0.498483	0.456518	0.453724	0.431523	0.324877	0.814618	0.746377	0.327313	0.603339	0.36982	0.424571	0.407253	0.3779	0.466811	0.395477	0.419683	0.511852	0.395166	0.327338	0.397949	0.404727	0.337627	0.307184	0.390272	0.377279	0.262436	0.355842	0.00188718	0.350997	0.351345	0.417566	0.366933	0.410168	0.612055	0.448465	0.333278	0.341095	0.426747	0.439918	0.369377	0.410244	0.240276	0.501991	0.385739	0.125228
BRD-K63913457	eicosatrienoic-acid	23	0.298285	0.390005	0.543782	0.409923	0.419297	0.413372	0.371504	0.854829	0.731537	0.260661	0.591685	0.293508	0.440956	0.412377	0.459384	0.404648	0.403298	0.391523	0.462593	0.357	0.355888	0.373639	0.368614	0.383719	0.310357	0.364825	0.370434	0.209523	0.340079	0.00539938	0.33346	0.430255	0.407853	0.346788	0.363707	0.660254	0.402626	0.303958	0.366601	0.421262	0.372851	0.20669	0.323243	0.104525	0.50951	0.316299	0.207458
BRD-A96820077	ungerine	23	0.298497	0.378426	0.516075	0.407055	0.39017	0.410339	0.353051	0.851597	0.745842	0.25817	0.5547	0.279688	0.406461	0.407517	0.435621	0.39302	0.402141	0.402857	0.437694	0.355293	0.346361	0.369089	0.361723	0.414678	0.312965	0.372191	0.371586	0.219336	0.347047	0.000518985	0.322022	0.41939	0.396945	0.342768	0.360625	0.646244	0.390005	0.312215	0.367317	0.401756	0.358601	0.187166	0.316005	0.116763	0.487375	0.316767	0.307391
BRD-K81062487	taurocholic-acid	23	0.298941	0.335968	0.491264	0.472387	0.459458	0.447484	0.330791	0.788278	0.715945	0.309102	0.583771	0.366219	0.409748	0.406376	0.387781	0.457767	0.394732	0.426255	0.53775	0.392432	0.348742	0.402583	0.422104	0.321515	0.280195	0.402695	0.38621	0.205176	0.342197	0.0012147	0.360768	0.353803	0.415264	0.352977	0.413417	0.6171	0.445307	0.331999	0.338637	0.419892	0.443135	0.339831	0.403295	0.265081	0.490365	0.360878	0.186967
BRD-A99411506	esculin	23	0.29899	0.375899	0.531128	0.406454	0.456561	0.404628	0.365307	0.858195	0.768824	0.275371	0.522511	0.280828	0.386676	0.390213	0.459137	0.406374	0.404136	0.398009	0.457766	0.363343	0.341203	0.375343	0.361578	0.390598	0.318677	0.380748	0.381171	0.190282	0.337266	0.000222362	0.327776	0.445796	0.400325	0.362107	0.365687	0.6752	0.42035	0.309241	0.370961	0.410536	0.37213	0.157388	0.31181	0.145833	0.492357	0.280194	0.278386
BRD-K40619305	larixinic-acid	23	0.299693	0.399143	0.468767	0.429793	0.428727	0.414188	0.378209	0.791315	0.79156	0.259638	0.631697	0.320896	0.357522	0.433689	0.466431	0.484676	0.40139	0.382408	0.513742	0.356716	0.319104	0.37708	0.42444	0.361143	0.321317	0.350079	0.374795	0.282701	0.287766	0.0314755	0.332625	0.387948	0.420184	0.37593	0.383052	0.611509	0.370733	0.287294	0.363748	0.425036	0.402004	0.211218	0.355181	0.105013	0.475891	0.35298	0.27669
BRD-K95402279	geranylgeraniol	23	0.300751	0.359281	0.489161	0.47021	0.454848	0.440153	0.322408	0.802211	0.752026	0.31578	0.578009	0.366772	0.431388	0.436885	0.381712	0.452518	0.397694	0.424818	0.535851	0.395645	0.348964	0.403636	0.403914	0.325278	0.313382	0.391943	0.37875	0.294109	0.344276	0.00571815	0.350849	0.355418	0.417351	0.367643	0.423303	0.618277	0.438527	0.330901	0.350895	0.422946	0.446438	0.392392	0.413511	0.253746	0.482946	0.356802	0.144094
BRD-K76600340	nicotinyl-alcohol-tartrate	23	0.302263	0.4403	0.501339	0.435581	0.46139	0.443661	0.372218	0.794551	0.753864	0.311743	0.613229	0.338731	0.404792	0.478649	0.472647	0.488815	0.406611	0.387458	0.506896	0.357413	0.33244	0.365621	0.456425	0.36315	0.326776	0.368901	0.381215	0.310638	0.303094	0.00951423	0.317098	0.397568	0.409689	0.373628	0.387729	0.611037	0.367406	0.332514	0.377104	0.418428	0.402518	0.241768	0.359457	0.0886899	0.458287	0.399488	0.247978
BRD-K37846922	3,3'-diindolylmethane	23	0.302356	0.369201	0.497558	0.476947	0.470198	0.447661	0.343266	0.80604	0.735537	0.311829	0.555165	0.382767	0.389175	0.420731	0.378147	0.438184	0.399234	0.424722	0.528657	0.395098	0.340578	0.403871	0.387884	0.321119	0.311476	0.39579	0.3807	0.204211	0.3339	0.00666648	0.348226	0.389943	0.413665	0.382035	0.413905	0.675494	0.439245	0.322103	0.345272	0.415602	0.448986	0.319745	0.379286	0.180096	0.497892	0.340519	0.194765
BRD-A15100685	avicin-d	24	0.1387	0.521601	0.523921	0.439771	0.176457	0.182898	0.462396	0.65835	0.67865	0.0298185	0.533005	0.0423696	0.497835	0.547078	0.266089	0.455474	0.38829	0.0842588	0.178887	0.0387236	0.0174131	0.367305	0.433147	0.0271352	0.0443159	0.0838861	0.531806	0.578111	0.424434	0.000155081	0.0572239	0.0948938	0.104725	0.0817252	0.469551	0.23018	0.041269	0.0629546	0.338157	0.0881427	0.458636	0.0325321	0.357662	0.417231	0.193712	0.0208516	0.021577
BRD-A65327625	6-hydroxytropinone	24	0.2879	0.375646	0.470708	0.41044	0.490952	0.428732	0.343276	0.860652	0.711436	0.280151	0.56559	0.300471	0.349995	0.369691	0.378925	0.354353	0.407287	0.37988	0.478531	0.353885	0.34317	0.379236	0.382495	0.349088	0.292016	0.354297	0.370457	0.0913583	0.28598	0.0054583	0.325695	0.412997	0.418503	0.396209	0.362734	0.650312	0.432752	0.313849	0.362726	0.409748	0.390753	0.16145	0.300825	0.0903622	0.448488	0.255532	0.131715
BRD-A49148672	galantamine	24	0.289084	0.448783	0.55427	0.429556	0.412507	0.420826	0.40319	0.833095	0.779509	0.249117	0.627546	0.335473	0.465433	0.44968	0.523941	0.411523	0.401465	0.400783	0.53495	0.357451	0.342626	0.361423	0.383005	0.293155	0.318624	0.352755	0.363868	0.136991	0.331543	0.000715581	0.313707	0.383536	0.424668	0.319834	0.376618	0.624931	0.406121	0.289362	0.363176	0.430894	0.388492	0.242242	0.342169	0.26782	0.487907	0.344153	0.0822636
BRD-K32977963	eugenol	24	0.291232	0.410591	0.53606	0.401513	0.329251	0.383971	0.392869	0.730253	0.691576	0.267679	0.520809	0.306284	0.361676	0.397465	0.487015	0.378819	0.401421	0.415129	0.436518	0.358197	0.266555	0.353386	0.347285	0.338735	0.318946	0.362628	0.370349	0.182528	0.283033	0.0151904	0.318323	0.378812	0.4298	0.325432	0.352245	0.527069	0.406191	0.324285	0.353126	0.416226	0.377628	0.24456	0.293159	0.126616	0.445589	0.337258	0.214003
BRD-A67373739	AICA-ribonucleotide	24	0.295472	0.427082	0.669475	0.487218	0.471013	0.409237	0.464006	0.832212	0.77453	0.322526	0.750251	0.407623	0.417859	0.517367	0.528024	0.430023	0.417104	0.456726	0.566222	0.387775	0.376977	0.353195	0.37941	0.289024	0.358614	0.346261	0.391814	0.058862	0.354132	0.000484024	0.28026	0.410325	0.402604	0.367518	0.386007	0.667804	0.476418	0.323861	0.350222	0.448096	0.418109	0.32314	0.312064	0.174368	0.681464	0.295961	0.184041
BRD-K31477169	methyl-everninic-acid	24	0.296671	0.427855	0.567213	0.425948	0.420825	0.443775	0.426031	0.840191	0.847052	0.315861	0.58675	0.316603	0.394151	0.479009	0.510708	0.433935	0.403812	0.360542	0.426626	0.376641	0.342062	0.376018	0.390052	0.390391	0.317392	0.382777	0.369902	0.224193	0.329673	0.00400864	0.317094	0.451342	0.400499	0.335751	0.390175	0.696786	0.387592	0.297539	0.385567	0.417968	0.396287	0.259478	0.304321	0.0801862	0.520432	0.30493	0.326263
BRD-K98519396	BRD-K98519396	24	0.297122	0.331957	0.489379	0.446361	0.366207	0.4157	0.306865	0.772578	0.714467	0.275651	0.532258	0.31886	0.35968	0.434871	0.410647	0.421018	0.400566	0.385092	0.521772	0.367032	0.349634	0.401246	0.400768	0.345384	0.290829	0.361966	0.371613	0.253222	0.360041	0.00666229	0.344596	0.373644	0.40061	0.330025	0.389423	0.5633	0.417659	0.268573	0.357853	0.431567	0.391672	0.356917	0.412442	0.216197	0.448157	0.385813	0.10527
BRD-A14566392	scopolamine	24	0.297354	0.394348	0.527684	0.401394	0.338098	0.430757	0.407096	0.867698	0.806429	0.277481	0.585384	0.274161	0.509455	0.422073	0.476425	0.43187	0.405886	0.390894	0.28952	0.36186	0.345565	0.381862	0.386793	0.379489	0.31431	0.365586	0.37023	0.219602	0.343559	0.00121112	0.324216	0.449696	0.39666	0.342161	0.361949	0.674635	0.414475	0.312689	0.375165	0.414645	0.366984	0.178884	0.296122	0.126764	0.50674	0.296109	0.225655
BRD-K18059238	gamma-linolenic-acid	24	0.297601	0.389464	0.483924	0.398843	0.433925	0.412614	0.390134	0.833665	0.757713	0.290625	0.61197	0.304292	0.399651	0.405883	0.424384	0.390634	0.408414	0.375664	0.483733	0.354749	0.348927	0.38161	0.367674	0.348133	0.312249	0.346818	0.368168	0.191299	0.300253	0.00312636	0.335204	0.411608	0.412913	0.365335	0.354043	0.683769	0.410196	0.322258	0.370844	0.413908	0.377162	0.196111	0.31631	0.113146	0.463207	0.336826	0.25566
BRD-A07824748	flavanone	24	0.300185	0.425875	0.573811	0.422342	0.388307	0.434687	0.416378	0.848049	0.749886	0.306483	0.648696	0.384367	0.477017	0.447037	0.463952	0.420687	0.396393	0.438255	0.52837	0.396488	0.324378	0.388519	0.399604	0.318351	0.312564	0.386643	0.381524	0.187274	0.337749	0.00114665	0.33183	0.372144	0.426908	0.370402	0.38963	0.669849	0.43806	0.354547	0.351372	0.425417	0.435038	0.250424	0.337359	0.159969	0.509686	0.375529	0.225484
BRD-K66944906	fraxidin	24	0.300301	0.391804	0.507794	0.394091	0.425005	0.410332	0.359017	0.845141	0.739216	0.282236	0.573689	0.284379	0.406241	0.377455	0.42022	0.39761	0.401862	0.391771	0.44162	0.350269	0.345354	0.364533	0.359487	0.407985	0.299558	0.371818	0.371648	0.207405	0.332085	0.000475058	0.316971	0.427806	0.411097	0.347136	0.351408	0.636007	0.403207	0.305975	0.366529	0.417305	0.375549	0.223599	0.311376	0.128515	0.486809	0.29575	0.215701
BRD-K48692744	NU-1025	24	0.301103	0.431632	0.635374	0.482671	0.45866	0.403934	0.438337	0.845949	0.793512	0.35662	0.728007	0.39184	0.436546	0.468508	0.505151	0.410223	0.416316	0.440296	0.538023	0.387728	0.362194	0.364626	0.378319	0.293817	0.367505	0.351165	0.389318	0.0743571	0.348918	0.000881242	0.298501	0.405393	0.410064	0.3646	0.390547	0.653476	0.48062	0.337015	0.352557	0.446696	0.406089	0.319527	0.345307	0.184896	0.629267	0.302367	0.18184
BRD-A95820578	BRD-A95820578	24	0.302022	0.389349	0.492862	0.47736	0.445691	0.440722	0.330662	0.795334	0.80891	0.301718	0.60323	0.368763	0.367099	0.491554	0.457271	0.496238	0.400617	0.398679	0.521073	0.380785	0.329943	0.411803	0.399135	0.398853	0.309331	0.396239	0.367409	0.274358	0.368994	0.00129602	0.370493	0.382522	0.408041	0.343813	0.415321	0.653829	0.405006	0.267417	0.357444	0.455082	0.420464	0.44475	0.419064	0.268847	0.445787	0.369637	0.162439
BRD-K79602928	metformin	25	0.270797	0.408238	0.468972	0.436543	0.574339	0.408137	0.516314	0.886888	0.697904	0.250665	0.774232	0.364272	0.493111	0.436613	0.466518	0.359734	0.400143	0.298864	0.515678	0.296026	0.426143	0.368423	0.428397	0.19626	0.249883	0.327472	0.376466	0.173729	0.260659	0.0255562	0.275717	0.315993	0.342882	0.484527	0.501968	0.601833	0.46587	0.216366	0.335989	0.332323	0.413636	0.233728	0.347478	0.153132	0.657416	0.358835	0.161014
BRD-A20589515	dihydroxyphenylglycine	25	0.286612	0.398851	0.449961	0.430544	0.459185	0.435192	0.360425	0.832526	0.688055	0.297435	0.671775	0.307078	0.420826	0.391734	0.391802	0.36064	0.409818	0.39001	0.487174	0.365041	0.345642	0.390135	0.391747	0.285047	0.290264	0.344852	0.353796	0.107928	0.287593	0.00515694	0.342697	0.424679	0.400184	0.38885	0.386292	0.622848	0.457128	0.316	0.381104	0.407408	0.390476	0.155225	0.325229	0.120173	0.49984	0.28094	0.14056
BRD-A68318914	5-methylhydantoin	25	0.292518	0.344696	0.460939	0.412478	0.497084	0.417877	0.347658	0.852948	0.728311	0.291623	0.656875	0.293373	0.344963	0.350406	0.374208	0.351187	0.406369	0.393193	0.484413	0.362481	0.352122	0.383021	0.376017	0.380437	0.28797	0.361788	0.361169	0.0947339	0.32542	0.00647489	0.325189	0.429088	0.413537	0.395833	0.349728	0.66359	0.423633	0.313563	0.361476	0.407774	0.395422	0.158591	0.321031	0.0988732	0.447755	0.250672	0.22362
BRD-K01624546	docosatrienoic-acid	25	0.292907	0.38987	0.511246	0.43283	0.476869	0.436799	0.369931	0.83748	0.747492	0.304489	0.632347	0.317763	0.451659	0.420705	0.417502	0.396911	0.404072	0.384455	0.506966	0.361835	0.358912	0.390706	0.387069	0.357576	0.307329	0.371117	0.358175	0.117206	0.297793	0.00472662	0.3278	0.440866	0.410427	0.373335	0.374377	0.674464	0.429412	0.316204	0.370071	0.409745	0.396421	0.184468	0.335122	0.056044	0.50084	0.297529	0.220808
BRD-K80325895	eicosadienoic-acid	25	0.293808	0.429685	0.56013	0.407768	0.362184	0.403985	0.409208	0.80018	0.743148	0.270442	0.62043	0.342786	0.352319	0.447947	0.549719	0.440985	0.402876	0.416238	0.463111	0.363038	0.328222	0.369426	0.403901	0.334822	0.321776	0.365593	0.369798	0.173784	0.33162	0.00175652	0.319059	0.395711	0.42415	0.341656	0.365217	0.616841	0.419822	0.336592	0.365351	0.43008	0.401223	0.240065	0.328839	0.150811	0.449069	0.347367	0.163245
BRD-A99571536	dubinidine	25	0.29493	0.367685	0.503726	0.397633	0.307159	0.393959	0.39818	0.770241	0.744789	0.230429	0.553125	0.307742	0.322182	0.437362	0.458931	0.368425	0.405061	0.400747	0.481158	0.365264	0.27924	0.357399	0.357427	0.297436	0.325988	0.358019	0.381021	0.176543	0.256007	0.00657741	0.32574	0.369465	0.409825	0.329225	0.344419	0.603891	0.419967	0.311843	0.347419	0.406135	0.367772	0.226197	0.287311	0.106566	0.455641	0.380254	0.259988
BRD-K20152659	gamma-homolinolenic-acid	25	0.295683	0.37675	0.487226	0.385106	0.296465	0.395791	0.362153	0.745315	0.684778	0.245224	0.550706	0.295335	0.334164	0.39069	0.470901	0.361111	0.401158	0.413759	0.420108	0.353881	0.301919	0.353452	0.363677	0.341587	0.315935	0.345213	0.378594	0.176843	0.305426	0.00289455	0.316562	0.352058	0.410001	0.323639	0.338155	0.577752	0.408257	0.303796	0.351972	0.419818	0.373717	0.225468	0.310141	0.118388	0.409737	0.371192	0.305426
BRD-K25741894	skimmianine	25	0.298307	0.404049	0.499996	0.425744	0.448434	0.424145	0.393757	0.83972	0.802462	0.323472	0.581044	0.319165	0.424737	0.462395	0.469385	0.424581	0.404997	0.383043	0.455833	0.370142	0.360834	0.387744	0.357763	0.396652	0.299231	0.372179	0.381174	0.175078	0.322037	0.00061768	0.356633	0.434318	0.399833	0.350741	0.374333	0.661326	0.413014	0.341267	0.371557	0.419031	0.389934	0.261087	0.364723	0.120434	0.51261	0.316857	0.22117
BRD-A74500471	ethambutol	25	0.299859	0.381731	0.494707	0.420616	0.487538	0.409253	0.370752	0.796409	0.789405	0.239974	0.664643	0.35301	0.481687	0.436524	0.43776	0.482653	0.402202	0.39249	0.540749	0.344853	0.300243	0.373578	0.396498	0.380163	0.331075	0.349257	0.374997	0.241927	0.289073	0.00868949	0.29514	0.388684	0.420361	0.367599	0.352702	0.612926	0.372909	0.273952	0.34313	0.408004	0.442877	0.226236	0.368264	0.146588	0.488686	0.347246	0.197137
BRD-A08877921	cephalotaxine	25	0.299865	0.448713	0.537005	0.412288	0.386758	0.4245	0.421439	0.835495	0.852771	0.325812	0.569909	0.321666	0.488858	0.46788	0.497641	0.462533	0.402067	0.381018	0.486941	0.352968	0.382156	0.374255	0.393437	0.398319	0.337377	0.37648	0.364578	0.19819	0.364523	0.000213279	0.336175	0.445596	0.40777	0.355087	0.375841	0.695419	0.415819	0.325219	0.366999	0.413152	0.409583	0.220861	0.338319	0.0675491	0.523128	0.304167	0.301841
BRD-A37959677	estrone	25	0.300185	0.405226	0.51746	0.408823	0.300765	0.394741	0.361216	0.781063	0.658463	0.303549	0.546926	0.300628	0.415743	0.366212	0.472267	0.384567	0.397983	0.420767	0.413774	0.362047	0.284395	0.352664	0.357129	0.374356	0.311847	0.370788	0.377414	0.20289	0.320512	0.00455969	0.316234	0.364803	0.435932	0.330524	0.361603	0.579325	0.417967	0.327867	0.356538	0.430187	0.376191	0.274661	0.307163	0.126884	0.439975	0.409551	0.170741
BRD-A30083233	BRD-A30083233	25	0.300657	0.364603	0.49469	0.430814	0.387626	0.419882	0.294653	0.794844	0.743394	0.302496	0.549249	0.318798	0.37935	0.457413	0.384082	0.446929	0.397607	0.387005	0.561413	0.363427	0.366037	0.382094	0.399251	0.427204	0.310713	0.394879	0.373951	0.27671	0.34617	0.00472961	0.337858	0.370326	0.400332	0.355197	0.376493	0.556387	0.402802	0.283059	0.349516	0.432453	0.401285	0.304062	0.402219	0.153179	0.450743	0.378848	0.215486
BRD-K26117720	gingerol	25	0.303295	0.423474	0.580585	0.448847	0.370007	0.417163	0.398194	0.802236	0.746641	0.285996	0.630957	0.362366	0.48568	0.419586	0.476855	0.412418	0.39794	0.456771	0.506345	0.393066	0.322201	0.384115	0.375745	0.300401	0.324383	0.388253	0.383625	0.254854	0.33167	0.00142997	0.319762	0.386239	0.430894	0.364037	0.40078	0.652613	0.423133	0.371752	0.347042	0.432969	0.411075	0.289713	0.343051	0.17693	0.546651	0.400035	0.233453
BRD-K89152108	liothyronine	25	0.303615	0.463735	0.573933	0.445194	0.4877	0.429712	0.415803	0.840011	0.737366	0.284491	0.593624	0.341758	0.443049	0.434769	0.498104	0.447268	0.404129	0.410461	0.501547	0.364595	0.296433	0.390848	0.386684	0.338457	0.349885	0.36911	0.383472	0.227483	0.315115	0.00345196	0.340082	0.40319	0.426613	0.345636	0.388401	0.704807	0.415091	0.293954	0.367827	0.432968	0.400338	0.232809	0.326853	0.149183	0.529721	0.355091	0.198705
BRD-K32696739	noreleagnine	25	0.303888	0.410591	0.520192	0.455963	0.460144	0.439741	0.41646	0.833678	0.802105	0.3037	0.64613	0.349422	0.408983	0.472174	0.499509	0.484168	0.404193	0.38475	0.584348	0.36994	0.351548	0.376724	0.409914	0.385327	0.33491	0.372457	0.379027	0.268344	0.30998	0.0236565	0.348774	0.436074	0.413232	0.384027	0.397861	0.701532	0.401725	0.330352	0.375003	0.438578	0.397662	0.246506	0.360906	0.0683725	0.511358	0.352714	0.24075
BRD-K89853519	fisetinidol	25	0.309841	0.478078	0.575506	0.475924	0.386309	0.421002	0.423526	0.834786	0.789923	0.3398	0.62673	0.329138	0.464078	0.432279	0.511352	0.418241	0.401328	0.417915	0.491093	0.376374	0.318688	0.379236	0.387274	0.338931	0.341683	0.387998	0.383873	0.2162	0.346632	0.0114452	0.347432	0.401328	0.409776	0.358838	0.398371	0.675094	0.43985	0.370345	0.369072	0.43707	0.376479	0.296772	0.354634	0.186873	0.462138	0.343392	0.198034
BRD-K20986251	lithocholic-acid	25	0.312735	0.372267	0.482848	0.474553	0.456816	0.456133	0.341319	0.816125	0.733874	0.350918	0.571479	0.388913	0.449156	0.433628	0.388744	0.465205	0.396531	0.444744	0.580692	0.423681	0.345357	0.429185	0.39304	0.375887	0.325854	0.397372	0.382387	0.279862	0.346106	0.00777291	0.385849	0.361701	0.417102	0.374763	0.416363	0.587912	0.465059	0.356984	0.350851	0.431712	0.454131	0.470882	0.42032	0.269214	0.478175	0.445139	0.240851
BRD-K65200617	BRD-K65200617	26	0.168958	0.254716	0.426786	0.429774	0.535387	0.475602	0.579194	0.949379	0.644283	0.00684279	0.748086	0.111027	0.907703	0.692076	0.395352	0.454901	0.405375	0.152168	0.828821	0.271987	0.0883201	0.256148	0.151826	0.0284172	0.613869	0.161409	0.147397	0.0110351	0.100977	8.16866e-09	0.220387	0.398517	0.40585	0.0772974	0.237148	0.892663	0.507613	0.256484	0.139258	0.346716	0.822653	0.00903279	0.0683184	0.000789236	0.587404	0.0588405	0.000518437
BRD-A58955223	sulforaphane	26	0.23735	0.617191	0.620925	0.460317	0.365596	0.371019	0.519905	0.712986	0.706026	0.256958	0.522709	0.325542	0.570903	0.585657	0.450438	0.489066	0.403012	0.318885	0.372779	0.270052	0.209142	0.390014	0.473916	0.243106	0.240606	0.331084	0.496756	0.328196	0.41861	0.000156184	0.233532	0.307248	0.270392	0.313897	0.435998	0.488	0.251362	0.254412	0.420297	0.299781	0.440583	0.205988	0.438059	0.36329	0.37302	0.169884	0.0460945
BRD-K56450366	NSC-94258	26	0.289604	0.379271	0.470505	0.41933	0.463191	0.427032	0.357496	0.855032	0.704107	0.285887	0.625945	0.314784	0.421258	0.377065	0.380114	0.343288	0.40772	0.384239	0.46347	0.358925	0.37054	0.385029	0.378706	0.288573	0.276229	0.340555	0.351053	0.0582397	0.310575	0.00294569	0.332991	0.413803	0.399378	0.392867	0.372264	0.669599	0.444426	0.318829	0.365489	0.396656	0.39101	0.159896	0.32314	0.0964975	0.453493	0.264251	0.175372
BRD-A95696820	acadesine	26	0.291054	0.381267	0.502311	0.419414	0.466161	0.422105	0.357287	0.861479	0.742942	0.326223	0.714113	0.319488	0.396948	0.380958	0.393513	0.356994	0.409596	0.380709	0.475253	0.363448	0.330955	0.388621	0.347521	0.305052	0.293336	0.348758	0.361985	0.0816034	0.279155	0.00311773	0.333277	0.409616	0.414856	0.382703	0.367423	0.683642	0.428228	0.315259	0.364267	0.417676	0.38423	0.168428	0.336225	0.0697745	0.504999	0.290929	0.136101
BRD-K05236810	luteolin	26	0.29207	0.392234	0.552796	0.474098	0.331692	0.467698	0.429113	0.83779	0.885495	0.234873	0.563964	0.326176	0.503931	0.417603	0.379803	0.461936	0.407774	0.393644	0.586192	0.323645	0.348287	0.39799	0.437652	0.319085	0.422277	0.315634	0.311291	0.237483	0.335268	2.99336e-06	0.386628	0.367777	0.423667	0.495977	0.420918	0.790086	0.454292	0.25127	0.357355	0.362191	0.444281	0.308775	0.348539	0.158799	0.546134	0.348509	0.137067
BRD-K07117950	imperatorin	26	0.292568	0.370845	0.518231	0.432963	0.460122	0.416699	0.400642	0.852383	0.756646	0.261073	0.669277	0.3003	0.400495	0.405671	0.442062	0.385653	0.407675	0.38408	0.510911	0.353914	0.348358	0.388003	0.384259	0.335825	0.298251	0.352725	0.371789	0.12074	0.312143	0.00202761	0.326357	0.421688	0.406972	0.353375	0.375294	0.68936	0.414537	0.29495	0.371268	0.410078	0.377081	0.161154	0.308644	0.0983311	0.498249	0.291492	0.183143
BRD-K20313525	rosmarinic-acid	26	0.295565	0.37025	0.506183	0.423628	0.470066	0.428031	0.361394	0.86005	0.737185	0.287942	0.684922	0.301493	0.450839	0.403521	0.442819	0.379659	0.405649	0.395037	0.432298	0.350476	0.3688	0.366639	0.370689	0.375804	0.29618	0.35263	0.363932	0.145076	0.307318	0.0173459	0.318934	0.415821	0.412764	0.361741	0.366379	0.688963	0.404207	0.325124	0.363423	0.406199	0.389854	0.190831	0.299869	0.113103	0.48047	0.32557	0.241382
BRD-K38903228	hesperidin	26	0.296269	0.409088	0.548455	0.454003	0.478496	0.457877	0.405875	0.870045	0.780974	0.31065	0.710407	0.306544	0.456154	0.42458	0.455646	0.386903	0.406121	0.397644	0.503199	0.356613	0.352744	0.381739	0.387456	0.334492	0.309212	0.365869	0.36593	0.0898038	0.313277	0.00198595	0.330134	0.44753	0.415285	0.358483	0.379795	0.676076	0.409431	0.324935	0.375015	0.414337	0.374655	0.17495	0.309598	0.145735	0.522891	0.292018	0.173998
BRD-K64044582	linoleamide	26	0.296811	0.358943	0.508776	0.409966	0.407602	0.393655	0.346311	0.849967	0.74363	0.270781	0.53346	0.286909	0.434628	0.419083	0.449557	0.383098	0.402256	0.398298	0.443619	0.360514	0.350302	0.368201	0.355225	0.385807	0.310043	0.372443	0.376696	0.237057	0.33514	0.00173625	0.318272	0.420098	0.41088	0.346227	0.364166	0.654547	0.401079	0.328844	0.36308	0.41183	0.367552	0.203247	0.317078	0.134093	0.457456	0.314392	0.210398
BRD-K46272620	valyltryptophan	26	0.297059	0.376544	0.504644	0.394582	0.401537	0.396457	0.343908	0.850783	0.749055	0.279644	0.474583	0.285247	0.431292	0.409203	0.439162	0.392914	0.4019	0.385144	0.491223	0.348297	0.320326	0.37061	0.351093	0.401659	0.310913	0.372033	0.37663	0.21736	0.352578	0.00560331	0.322349	0.417733	0.406771	0.34212	0.353309	0.624904	0.410263	0.311702	0.362041	0.411631	0.368148	0.198415	0.310689	0.102216	0.419197	0.344884	0.259959
BRD-K04170657	psoromic-acid	26	0.298025	0.457778	0.523896	0.390803	0.454467	0.409222	0.374578	0.840791	0.792514	0.265454	0.54387	0.292312	0.468612	0.457011	0.48212	0.419337	0.398464	0.369981	0.512982	0.348109	0.355042	0.357952	0.38866	0.41196	0.312576	0.395734	0.36359	0.256709	0.293388	0.0021567	0.303411	0.444108	0.420002	0.364928	0.361242	0.692631	0.378831	0.340822	0.378284	0.40942	0.380484	0.215533	0.316799	0.079999	0.534071	0.365864	0.2836
BRD-A91555231	norepinephrine	26	0.298399	0.291798	0.418428	0.443623	0.464373	0.381008	0.318752	0.813061	0.642782	0.255796	0.765182	0.310899	0.398959	0.371606	0.308929	0.383027	0.403544	0.373594	0.457849	0.35571	0.333294	0.384341	0.347891	0.316411	0.338526	0.326677	0.382939	0.0947679	0.298712	0.07076	0.336342	0.364257	0.44607	0.398901	0.395856	0.502456	0.446576	0.260474	0.354386	0.42789	0.392973	0.243114	0.382193	0.204682	0.476346	0.495408	0.122023
BRD-K64935403	ebelactone-b	26	0.299458	0.412582	0.487419	0.509424	0.494006	0.487393	0.330775	0.830447	0.7679	0.358366	0.531119	0.361564	0.422243	0.464618	0.431305	0.476283	0.396532	0.380087	0.568218	0.381559	0.304707	0.399923	0.43074	0.343505	0.30159	0.397525	0.383953	0.212271	0.349846	0.0206312	0.377817	0.40802	0.411423	0.352214	0.432364	0.680999	0.443235	0.326388	0.371292	0.440334	0.417408	0.416127	0.393106	0.239135	0.478869	0.328225	0.0509886
BRD-K94080537	diethyltoluamide	26	0.300157	0.420885	0.531899	0.456468	0.506417	0.467513	0.442808	0.867712	0.741149	0.290966	0.658994	0.323333	0.427333	0.459067	0.462381	0.399264	0.409281	0.392135	0.522255	0.360304	0.362002	0.385635	0.409581	0.340311	0.329815	0.363626	0.367822	0.142667	0.32711	0.00107083	0.335828	0.46639	0.419036	0.375948	0.373856	0.697903	0.430501	0.34048	0.392216	0.41847	0.398021	0.18533	0.318333	0.106292	0.492789	0.287855	0.215676
BRD-K86191271	cytosporone-b	26	0.301656	0.449277	0.65446	0.498582	0.429006	0.406124	0.482736	0.835382	0.786648	0.339875	0.717198	0.413111	0.454846	0.518932	0.521166	0.426999	0.419249	0.453346	0.580553	0.395834	0.375056	0.359722	0.386983	0.271421	0.3833	0.339038	0.391309	0.0696962	0.358931	0.000796268	0.302436	0.40974	0.394399	0.371183	0.404817	0.645728	0.494493	0.319926	0.349018	0.447207	0.413791	0.367957	0.34108	0.217157	0.685069	0.307507	0.169919
BRD-K84175871	pseudoephedrine	26	0.302	0.380907	0.492807	0.412369	0.405896	0.415116	0.349753	0.827489	0.76152	0.276859	0.481905	0.280754	0.390657	0.407181	0.444533	0.416961	0.399219	0.392533	0.422908	0.365808	0.333012	0.378766	0.353298	0.393735	0.310571	0.377922	0.386394	0.199856	0.338837	0.000784114	0.344236	0.428931	0.414847	0.333869	0.364058	0.623011	0.407997	0.322769	0.368553	0.415872	0.364553	0.241665	0.361904	0.154828	0.433602	0.324174	0.191507
BRD-K40902647	vincamine	26	0.302821	0.42265	0.50698	0.414612	0.436618	0.41222	0.388072	0.828104	0.810857	0.302516	0.661855	0.321036	0.483722	0.494074	0.427362	0.440418	0.406047	0.380694	0.54787	0.36196	0.378006	0.381727	0.408778	0.40257	0.314599	0.360765	0.352885	0.214764	0.319898	0.000382356	0.346775	0.401814	0.411251	0.391354	0.376985	0.664226	0.430148	0.330309	0.374261	0.422539	0.400402	0.218616	0.340668	0.0654288	0.565368	0.411942	0.263191
BRD-A41301928	bongkrek-acid	26	0.303196	0.42016	0.496838	0.416969	0.370901	0.421158	0.389569	0.802414	0.768153	0.245748	0.674647	0.305078	0.462919	0.413822	0.408076	0.443343	0.406424	0.378424	0.545831	0.353628	0.380044	0.380055	0.384797	0.404238	0.31589	0.359733	0.365776	0.200706	0.32215	0.00315374	0.33998	0.405565	0.411179	0.364501	0.372125	0.649926	0.419006	0.319614	0.360846	0.419936	0.392217	0.246691	0.338303	0.0708417	0.525577	0.366307	0.324473
BRD-K28912512	nicotinamide	26	0.303431	0.364631	0.484038	0.439993	0.415184	0.433096	0.363408	0.793824	0.762366	0.292097	0.631236	0.371703	0.403456	0.394667	0.391032	0.449329	0.401419	0.438202	0.53703	0.384868	0.326036	0.396129	0.395623	0.332799	0.321922	0.365607	0.395208	0.269987	0.290591	0.0276989	0.338419	0.348733	0.435872	0.384751	0.410214	0.623819	0.412298	0.309635	0.348295	0.425989	0.444156	0.266662	0.379874	0.139049	0.490067	0.402525	0.279527
BRD-K09436313	prostaglandin	26	0.303873	0.421624	0.506743	0.466602	0.510169	0.500646	0.373874	0.83291	0.787118	0.343498	0.455201	0.370821	0.445307	0.451449	0.426659	0.510407	0.401289	0.380181	0.615865	0.386499	0.303058	0.41821	0.408194	0.411648	0.303686	0.403595	0.363625	0.345638	0.375918	0.0471524	0.412158	0.405055	0.40649	0.403039	0.401021	0.656668	0.43772	0.326051	0.366953	0.421735	0.439579	0.348226	0.384529	0.199513	0.373323	0.304878	0.0730033
BRD-A66395008	parthenolide	26	0.304795	0.409819	0.491809	0.492736	0.478861	0.492148	0.367562	0.811704	0.763578	0.296109	0.536045	0.359686	0.387225	0.509903	0.430905	0.512775	0.402593	0.397124	0.552658	0.389106	0.349185	0.417652	0.451518	0.353168	0.307378	0.415482	0.369563	0.321335	0.374369	0.00432036	0.366564	0.411218	0.415568	0.372928	0.428857	0.58209	0.417872	0.28409	0.363582	0.450452	0.430345	0.360011	0.416145	0.224255	0.44459	0.301654	0.114016
BRD-A64125466	dehydrocholic-acid	26	0.3061	0.426724	0.547902	0.434503	0.445042	0.423073	0.443655	0.848506	0.819253	0.261716	0.656635	0.327624	0.451205	0.451129	0.484529	0.438537	0.408586	0.390946	0.53351	0.366535	0.357149	0.381043	0.434391	0.358484	0.342947	0.365025	0.374153	0.195981	0.342375	0.000870558	0.328062	0.445819	0.421127	0.389622	0.369906	0.570107	0.433276	0.306074	0.377983	0.420472	0.406506	0.24606	0.347726	0.119825	0.567014	0.374671	0.245172
BRD-K43887077	dopamine	26	0.307014	0.432209	0.466231	0.425925	0.485342	0.420381	0.392024	0.855855	0.748688	0.305455	0.672293	0.311237	0.362711	0.362383	0.369312	0.391463	0.409375	0.390796	0.342469	0.361038	0.348589	0.398696	0.431187	0.316985	0.338712	0.357074	0.388661	0.173884	0.316858	0.0213051	0.346558	0.417879	0.434816	0.408706	0.390021	0.692161	0.462932	0.306846	0.366703	0.421581	0.402779	0.215734	0.369565	0.185776	0.485132	0.418827	0.188124
BRD-K99621550	tubocurarine	26	0.309112	0.392914	0.491816	0.417132	0.416386	0.42006	0.419324	0.850472	0.835829	0.289791	0.606988	0.300608	0.39673	0.428297	0.463153	0.416633	0.404022	0.414899	0.464947	0.36934	0.377684	0.375228	0.386967	0.405521	0.329038	0.382349	0.378452	0.217813	0.305362	0.00520498	0.340595	0.433023	0.423627	0.390663	0.362783	0.549906	0.427111	0.336816	0.369949	0.420771	0.382361	0.225416	0.36512	0.119804	0.491664	0.389031	0.237054
BRD-K54728231	endecaphyllin-x	26	0.309569	0.408081	0.555584	0.461377	0.478203	0.431577	0.410909	0.871305	0.781148	0.27434	0.603804	0.317358	0.458099	0.43764	0.462782	0.417545	0.409412	0.40024	0.485707	0.38178	0.355521	0.385665	0.396846	0.38921	0.320703	0.381766	0.384179	0.197067	0.343642	0.000704783	0.335942	0.44308	0.411881	0.373763	0.37544	0.711671	0.418386	0.306241	0.369931	0.414565	0.425326	0.182833	0.321391	0.170113	0.498633	0.282127	0.285472
BRD-A51410489	yohimbine	26	0.310613	0.397966	0.503467	0.422806	0.464128	0.441899	0.389598	0.835482	0.796354	0.324418	0.605415	0.316074	0.491012	0.435613	0.459256	0.399207	0.408294	0.412288	0.469742	0.358515	0.349752	0.371679	0.377832	0.370403	0.299734	0.373371	0.387288	0.246115	0.295135	0.00653695	0.331041	0.429316	0.40294	0.35624	0.371159	0.637489	0.415669	0.324874	0.367891	0.410416	0.376392	0.234283	0.340163	0.186404	0.478692	0.359658	0.283652
BRD-K73589401	corticosterone	26	0.31247	0.434846	0.45136	0.423318	0.475209	0.461224	0.372138	0.858173	0.809108	0.365049	0.553532	0.375578	0.478769	0.499744	0.455045	0.523823	0.403626	0.415934	0.593135	0.366381	0.304871	0.384946	0.433769	0.385661	0.345662	0.366731	0.386167	0.310908	0.272665	0.118394	0.36434	0.382256	0.418465	0.371268	0.371008	0.705958	0.436401	0.40817	0.370767	0.42357	0.425887	0.263649	0.408098	0.101622	0.450814	0.368289	0.314107
BRD-K59873006	digitoxin	27	0.150957	0.814437	0.701818	0.751012	0.656297	0.49167	0.677952	0.954583	0.352229	0.0389077	0.608972	0.52522	0.624972	0.768851	0.287835	0.246454	0.390388	0.112464	0.650611	0.244782	0.00530723	0.272247	0.0685575	0.0540673	0.815243	0.514938	0.0308349	0.36436	0.137702	1.06107e-07	0.176292	0.168098	0.441641	0.122432	0.25327	0.893488	0.0428988	0.182382	0.128561	0.276139	0.16458	0.00313666	0.00127084	0.00287431	0.515243	0.0154291	5.64951e-09
BRD-K00259736	colchicine	27	0.281001	0.489266	0.439834	0.491294	0.336701	0.502854	0.347521	0.88758	0.83853	0.464706	0.832269	0.319453	0.498372	0.512799	0.387421	0.337762	0.411306	0.300805	0.482995	0.376692	0.361884	0.313357	0.48565	0.257634	0.367017	0.350745	0.338826	0.0756916	0.234749	4.4285e-06	0.264798	0.396187	0.402429	0.422116	0.466502	0.808285	0.485459	0.383276	0.377254	0.321489	0.455386	0.120339	0.239819	0.0938907	0.713496	0.321666	0.0292975
BRD-A80960055	celastrol	27	0.290653	0.325623	0.575781	0.545548	0.451963	0.455816	0.370271	0.810646	0.865769	0.307387	0.582345	0.35908	0.361808	0.530248	0.457471	0.493191	0.409391	0.397514	0.661925	0.40942	0.27641	0.432044	0.385287	0.333019	0.328392	0.348199	0.351292	0.130739	0.334091	0.00554539	0.387192	0.397366	0.421781	0.388143	0.488262	0.733233	0.505839	0.238151	0.349429	0.46049	0.519344	0.379017	0.445907	0.201917	0.545997	0.348545	0.0764337
BRD-K47869605	podophyllotoxin	27	0.293827	0.463838	0.504893	0.560867	0.351341	0.488031	0.350216	0.871427	0.801447	0.430238	0.673608	0.385771	0.492161	0.546437	0.396289	0.377323	0.402334	0.353696	0.532927	0.378647	0.326168	0.353168	0.456272	0.351067	0.353809	0.409593	0.381501	0.132066	0.309483	0.0460253	0.288855	0.442207	0.400551	0.378189	0.447778	0.775964	0.447407	0.338528	0.348314	0.394719	0.454497	0.200318	0.304009	0.1253	0.635619	0.337721	0.0844109
BRD-A09495397	bicuculline	27	0.296785	0.388402	0.484927	0.414847	0.423625	0.413788	0.334236	0.854766	0.734034	0.303394	0.658421	0.306546	0.364631	0.387688	0.373102	0.348177	0.410182	0.401503	0.462499	0.361588	0.352375	0.376211	0.351073	0.358654	0.296314	0.35909	0.366678	0.109657	0.289597	0.00598321	0.323294	0.409175	0.408582	0.392138	0.35839	0.710181	0.422364	0.331688	0.35917	0.410953	0.398456	0.171259	0.328649	0.0817864	0.468775	0.26714	0.293445
BRD-K71823332	epothilone-a	27	0.297627	0.414552	0.497473	0.485466	0.412295	0.496154	0.33039	0.840642	0.779511	0.350999	0.607392	0.3679	0.413316	0.531949	0.464011	0.447824	0.402207	0.375591	0.523686	0.386014	0.345057	0.395152	0.44131	0.330402	0.304128	0.397535	0.368982	0.204749	0.337402	0.0055194	0.317856	0.4009	0.40909	0.314363	0.425815	0.706976	0.443712	0.336903	0.362541	0.448667	0.447807	0.423354	0.365936	0.211967	0.498035	0.327559	0.103897
BRD-K33193182	methylnorlichexanthone	27	0.298724	0.42791	0.523254	0.426298	0.4455	0.391006	0.407267	0.856207	0.817318	0.272841	0.594268	0.304609	0.42666	0.513841	0.480311	0.404945	0.401746	0.415757	0.505156	0.351556	0.372595	0.368358	0.403941	0.407808	0.310283	0.382295	0.377408	0.270248	0.307181	0.0142469	0.314541	0.447421	0.409291	0.344431	0.375523	0.686995	0.408952	0.307925	0.372268	0.407606	0.390791	0.17891	0.288724	0.104217	0.521461	0.317102	0.272602
BRD-K44276885	acarbose	27	0.299979	0.312316	0.40338	0.428412	0.45321	0.398868	0.33835	0.865432	0.70419	0.303274	0.676125	0.32969	0.428511	0.413324	0.325147	0.346631	0.407861	0.403688	0.51483	0.361326	0.327468	0.388565	0.365809	0.342112	0.327002	0.363126	0.37781	0.0826743	0.287313	0.0404458	0.33308	0.390695	0.429414	0.418899	0.369625	0.690853	0.447408	0.330382	0.356903	0.429908	0.401983	0.170504	0.35926	0.11879	0.467081	0.389467	0.135728
BRD-A29731977	17-hydroxyprogesterone-caproate	27	0.300184	0.387939	0.415488	0.473843	0.441442	0.413417	0.377681	0.821265	0.681039	0.280975	0.606184	0.343281	0.399754	0.436505	0.384278	0.395411	0.401467	0.398645	0.494243	0.370553	0.306357	0.396943	0.40837	0.292637	0.340398	0.364323	0.382641	0.131044	0.284432	0.0231512	0.331447	0.384578	0.431334	0.407666	0.410516	0.620329	0.434551	0.308613	0.371031	0.441322	0.388847	0.154505	0.359612	0.0967476	0.429424	0.39582	0.138689
BRD-K05906022	limonin	27	0.300521	0.373367	0.502816	0.385332	0.391823	0.408572	0.362911	0.854903	0.747702	0.281818	0.543551	0.277821	0.410116	0.395229	0.431797	0.394525	0.402501	0.401905	0.460199	0.360115	0.360296	0.371991	0.354685	0.394329	0.325571	0.369943	0.367705	0.233734	0.351283	0.00849115	0.330957	0.42319	0.407768	0.353856	0.349312	0.661081	0.401451	0.302417	0.363522	0.411867	0.364764	0.210055	0.315119	0.117908	0.502355	0.316632	0.236563
BRD-K63550407	erythromycin	27	0.30111	0.408066	0.507797	0.409477	0.453392	0.428435	0.401212	0.866632	0.870569	0.297976	0.657464	0.347313	0.575767	0.524994	0.434795	0.453904	0.407967	0.365886	0.58301	0.345623	0.441368	0.391271	0.433822	0.370926	0.382187	0.37077	0.347891	0.241703	0.307864	0.00184365	0.315027	0.429182	0.401982	0.381117	0.382667	0.726121	0.425829	0.303801	0.379066	0.396052	0.430905	0.22577	0.383803	0.0910559	0.588081	0.39451	0.259103
BRD-K05737787	isoeugenol	27	0.302654	0.458876	0.536275	0.417367	0.466541	0.388346	0.390397	0.859427	0.778428	0.267869	0.552077	0.284799	0.43528	0.445259	0.51378	0.451427	0.397799	0.386952	0.508258	0.364347	0.339324	0.370182	0.390994	0.365014	0.354857	0.368768	0.377294	0.218426	0.334341	0.000169328	0.325644	0.452473	0.418443	0.338444	0.36431	0.7095	0.394404	0.311196	0.370246	0.413345	0.384947	0.167815	0.307722	0.118649	0.507996	0.322621	0.325751
BRD-A91699651	chloroquine	27	0.303633	0.438839	0.604988	0.47723	0.470489	0.42096	0.450457	0.873019	0.813554	0.335167	0.745511	0.406213	0.520239	0.508011	0.481299	0.39262	0.409817	0.43715	0.554298	0.39004	0.399758	0.36927	0.353628	0.306897	0.387455	0.371859	0.389448	0.171719	0.333784	0.00116205	0.287031	0.431024	0.408896	0.377748	0.415907	0.71318	0.47003	0.365838	0.366295	0.444071	0.421537	0.27097	0.336241	0.118667	0.643383	0.350682	0.17236
BRD-A52805806	totaralolal	27	0.303799	0.365762	0.493313	0.435051	0.482238	0.422441	0.385803	0.864967	0.763021	0.28145	0.662118	0.30244	0.422872	0.379067	0.449651	0.387818	0.405779	0.404345	0.478641	0.362568	0.345527	0.381169	0.394773	0.383127	0.314249	0.364004	0.37741	0.107701	0.337314	0.0112529	0.328703	0.431117	0.420971	0.357244	0.372925	0.655131	0.41466	0.311322	0.365874	0.413746	0.407929	0.209731	0.332038	0.111799	0.465821	0.321349	0.199039
BRD-A95445494	maackiain	27	0.304063	0.407591	0.529062	0.418642	0.409982	0.413035	0.37663	0.827681	0.781296	0.272941	0.532216	0.316566	0.402997	0.402022	0.439997	0.397997	0.404412	0.397665	0.507428	0.362929	0.346139	0.371287	0.360571	0.383613	0.331961	0.378978	0.372959	0.250754	0.334704	0.00884203	0.329154	0.439077	0.412472	0.361776	0.367765	0.655785	0.413044	0.330835	0.364297	0.405486	0.380978	0.198524	0.307098	0.100785	0.479716	0.322997	0.266669
BRD-A65767837	hydrocortisone	27	0.305312	0.404452	0.448705	0.36754	0.363025	0.418717	0.384392	0.794976	0.779034	0.347162	0.411343	0.345751	0.409729	0.437513	0.493912	0.393074	0.407997	0.447179	0.51273	0.388035	0.264319	0.400183	0.374527	0.334216	0.373991	0.362702	0.348091	0.136449	0.280261	0.0555368	0.358735	0.34066	0.404166	0.313467	0.334532	0.675796	0.480862	0.408082	0.349642	0.410435	0.37916	0.222269	0.369373	0.131848	0.334225	0.375249	0.376308
BRD-A17016119	rhizocarpic-acid	27	0.30607	0.425372	0.486173	0.413293	0.389956	0.400341	0.400876	0.784276	0.802045	0.268871	0.620139	0.314214	0.443615	0.462393	0.403059	0.456736	0.404425	0.381075	0.512707	0.366999	0.36734	0.377968	0.363903	0.39581	0.321956	0.377498	0.365677	0.243627	0.325947	0.000446503	0.352204	0.406039	0.414388	0.371322	0.36824	0.691655	0.424441	0.307672	0.36909	0.422411	0.381572	0.227029	0.335515	0.0788466	0.582041	0.424525	0.337801
BRD-K59574735	ubenimex	27	0.307929	0.389767	0.505386	0.444566	0.465745	0.431824	0.388522	0.827237	0.777756	0.312037	0.621022	0.314078	0.417684	0.46101	0.468282	0.455751	0.408761	0.396005	0.500424	0.362049	0.346331	0.381816	0.404146	0.395169	0.318916	0.367926	0.374506	0.246735	0.333911	0.0279627	0.338535	0.410449	0.421251	0.370548	0.383888	0.661942	0.409026	0.301404	0.36461	0.425715	0.387795	0.248008	0.359785	0.14904	0.494137	0.332398	0.270657
BRD-A62035778	scopolamine	27	0.310066	0.422297	0.509066	0.410783	0.398438	0.404557	0.382707	0.855883	0.831228	0.315666	0.63442	0.312622	0.434139	0.406634	0.430295	0.44591	0.405597	0.394452	0.516936	0.363486	0.380296	0.37876	0.391883	0.431558	0.324875	0.380489	0.37026	0.249719	0.347177	0.000711511	0.345312	0.42421	0.415354	0.375676	0.368917	0.63077	0.421037	0.315469	0.368932	0.423794	0.388019	0.275443	0.367067	0.0630163	0.533361	0.433176	0.317824
BRD-K52640952	BRD-K52640952	27	0.311189	0.388685	0.431858	0.44972	0.456654	0.442355	0.347046	0.824869	0.772621	0.295675	0.561696	0.335395	0.360813	0.464369	0.431632	0.469596	0.403758	0.399503	0.514061	0.394539	0.329759	0.422535	0.402371	0.369803	0.283749	0.386113	0.368975	0.311795	0.361156	0.00503689	0.378048	0.367297	0.415953	0.330818	0.390327	0.585069	0.429157	0.346956	0.356589	0.446641	0.410134	0.439645	0.397343	0.198816	0.421471	0.422894	0.147344
BRD-K92138166	mammea-a	27	0.312313	0.47176	0.53739	0.488113	0.478	0.490358	0.38562	0.862965	0.839255	0.318634	0.544011	0.358397	0.467083	0.488868	0.442276	0.447351	0.400365	0.406437	0.465904	0.388586	0.332654	0.418359	0.403918	0.37662	0.343436	0.372367	0.379382	0.259644	0.354609	0.00516238	0.382904	0.469099	0.404634	0.366161	0.429452	0.683364	0.43179	0.325356	0.370902	0.435845	0.392307	0.284062	0.399331	0.165832	0.546516	0.298111	0.0978474
BRD-A96407378	allantoin	28	0.214494	0.471916	0.439089	0.398028	0.722956	0.427063	0.695914	0.883576	0.707519	0.230829	0.836289	0.274507	0.429621	0.382944	0.667766	0.36104	0.400883	0.122062	0.462976	0.159117	0.471203	0.307442	0.418045	0.0877179	0.171922	0.279037	0.310238	0.179839	0.230513	2.04721e-05	0.214025	0.282479	0.183832	0.550697	0.608517	0.439668	0.449786	0.0828852	0.332255	0.257327	0.380642	0.183042	0.308742	0.0404133	0.706775	0.135438	0.058276
BRD-K50384076	7,4'-dihydroxyflavone	28	0.295813	0.396575	0.494255	0.413715	0.478435	0.433647	0.343706	0.859771	0.773536	0.31268	0.736352	0.31107	0.401124	0.398831	0.38422	0.363937	0.408326	0.409347	0.5033	0.366498	0.370486	0.387435	0.380695	0.341293	0.311711	0.354208	0.363094	0.0801369	0.326463	0.00266136	0.338245	0.437107	0.422588	0.4072	0.360006	0.743839	0.443318	0.343549	0.363754	0.406181	0.405404	0.188984	0.312752	0.0597961	0.514816	0.306387	0.215828
BRD-A04308630	genipin	28	0.295935	0.291185	0.420557	0.467245	0.376406	0.39766	0.356801	0.812654	0.782946	0.2743	0.553122	0.349823	0.436361	0.425725	0.343214	0.359283	0.413083	0.396323	0.534502	0.370746	0.300932	0.372424	0.401507	0.252086	0.378632	0.338419	0.381933	0.0953264	0.242051	0.110903	0.332273	0.358491	0.430853	0.441694	0.395024	0.656626	0.481858	0.305273	0.340015	0.430544	0.406897	0.164345	0.338892	0.18484	0.472602	0.389903	0.185639
BRD-A80928489	1-monopalmitin	28	0.297481	0.380006	0.459003	0.397266	0.452293	0.427464	0.360355	0.843788	0.687231	0.294955	0.654195	0.289679	0.41948	0.384112	0.389243	0.346225	0.409823	0.39973	0.414411	0.37668	0.388089	0.382524	0.390116	0.336987	0.296993	0.340535	0.36844	0.156539	0.306262	0.00304699	0.349831	0.422803	0.395462	0.383948	0.361744	0.652009	0.448667	0.348717	0.371534	0.394448	0.408036	0.162573	0.324029	0.0920073	0.461023	0.314148	0.233703
BRD-K52459643	prostaglandin-e1	28	0.300519	0.382399	0.51254	0.407833	0.400004	0.415964	0.37117	0.836549	0.747421	0.301834	0.528107	0.288436	0.477913	0.396142	0.432256	0.399702	0.407012	0.382605	0.461074	0.359836	0.33696	0.367117	0.359704	0.382808	0.313525	0.360845	0.357282	0.236974	0.335322	0.000521798	0.324809	0.422427	0.407121	0.345743	0.351805	0.623377	0.395319	0.299807	0.370999	0.412009	0.377185	0.214023	0.314855	0.156104	0.465366	0.30878	0.229482
BRD-K82865713	prostaglandin-b2	28	0.300668	0.403346	0.51995	0.435913	0.465981	0.436168	0.400119	0.852785	0.764325	0.319251	0.582967	0.296994	0.410333	0.419407	0.474011	0.409164	0.403258	0.401069	0.432127	0.359745	0.316628	0.372282	0.358982	0.369291	0.294902	0.374366	0.369511	0.220451	0.313781	0.000871125	0.341907	0.416761	0.416279	0.337307	0.366642	0.605131	0.412051	0.324028	0.367419	0.419782	0.38275	0.238828	0.334142	0.117108	0.506378	0.293252	0.262127
BRD-A68631409	evodiamine	28	0.3016	0.439488	0.665873	0.514155	0.46315	0.425571	0.462748	0.858708	0.767519	0.356298	0.755111	0.42829	0.4536	0.523094	0.533823	0.426143	0.417574	0.452291	0.565592	0.393368	0.370773	0.35826	0.404885	0.267495	0.383028	0.343446	0.395996	0.0596515	0.358983	0.000536051	0.287874	0.4159	0.401119	0.364829	0.407284	0.712688	0.495638	0.335988	0.352247	0.450554	0.42475	0.364192	0.315531	0.190647	0.695254	0.289496	0.147759
BRD-A99177642	deltaline	28	0.302422	0.378914	0.507045	0.38854	0.392853	0.396817	0.363935	0.848412	0.714638	0.282056	0.497923	0.282889	0.392039	0.383005	0.437809	0.384229	0.400918	0.393964	0.448242	0.355296	0.346351	0.368596	0.353349	0.422948	0.315645	0.371459	0.372774	0.256516	0.348386	0.000594202	0.31932	0.43197	0.402501	0.348142	0.358434	0.62808	0.401298	0.299565	0.37038	0.412532	0.365483	0.172194	0.311306	0.133789	0.465929	0.329926	0.249206
BRD-A59215453	lobelanidine	28	0.302841	0.389933	0.510027	0.395273	0.403879	0.395744	0.368023	0.847208	0.778371	0.275841	0.526326	0.279512	0.425581	0.392892	0.423635	0.390478	0.402083	0.379724	0.488998	0.349814	0.3347	0.364712	0.357136	0.378761	0.317744	0.369022	0.365564	0.198717	0.332485	0.00147381	0.327901	0.424546	0.40363	0.354432	0.35537	0.641543	0.402255	0.319599	0.365251	0.408228	0.370788	0.184823	0.311308	0.113234	0.46477	0.314136	0.408329
BRD-K19284129	salvinorin-a	28	0.303074	0.413213	0.537968	0.454394	0.492104	0.43094	0.395989	0.867298	0.737932	0.302892	0.692519	0.317722	0.441697	0.403243	0.467552	0.402933	0.407839	0.399871	0.472079	0.357416	0.350672	0.382345	0.393221	0.358682	0.300803	0.368275	0.375926	0.124239	0.329954	0.000950641	0.33592	0.445829	0.413648	0.364106	0.380634	0.712189	0.419854	0.322263	0.378959	0.412494	0.383405	0.176947	0.307964	0.127908	0.491227	0.289871	0.218965
BRD-K01493881	apigenin	28	0.30377	0.392653	0.52769	0.534327	0.488256	0.459725	0.385667	0.847251	0.820422	0.296012	0.617954	0.411079	0.386061	0.479311	0.403957	0.500793	0.397291	0.42072	0.605011	0.428349	0.334887	0.43705	0.414392	0.365423	0.317932	0.383893	0.385478	0.275277	0.370693	0.00594604	0.435705	0.389885	0.428829	0.39161	0.460216	0.673979	0.472268	0.310529	0.349031	0.453063	0.50453	0.430722	0.473275	0.274475	0.537568	0.32288	0.133348
BRD-K89210380	biotin	28	0.303999	0.385316	0.524598	0.420471	0.419419	0.418524	0.362762	0.845293	0.731834	0.281993	0.519299	0.27875	0.452839	0.395142	0.461462	0.394244	0.404741	0.400971	0.463463	0.371044	0.373654	0.380236	0.366193	0.372767	0.318423	0.36659	0.375668	0.198586	0.347954	0.000863016	0.327061	0.437494	0.400996	0.354419	0.370515	0.635217	0.417278	0.321658	0.372733	0.41735	0.375301	0.194057	0.330051	0.171836	0.473796	0.341412	0.27402
BRD-K52015643	deoxyrhapontin	28	0.304629	0.413205	0.493427	0.412709	0.404692	0.431809	0.394855	0.807661	0.815333	0.293976	0.581702	0.317164	0.467475	0.426865	0.428133	0.429001	0.40498	0.396767	0.470246	0.364646	0.386053	0.382865	0.376891	0.430663	0.319836	0.376743	0.365426	0.263868	0.336132	0.00399891	0.341743	0.409322	0.407631	0.374216	0.365764	0.639355	0.430559	0.31759	0.372097	0.416414	0.388896	0.235912	0.36901	0.0667407	0.510069	0.408753	0.275788
BRD-A01826957	xanthinol	28	0.305012	0.414357	0.508086	0.474001	0.483482	0.452056	0.368611	0.807675	0.790672	0.304713	0.629598	0.34601	0.417695	0.470627	0.472815	0.499379	0.405881	0.399304	0.576876	0.361755	0.339128	0.379512	0.453474	0.368706	0.349365	0.366426	0.369462	0.244727	0.31879	0.0253122	0.348913	0.407718	0.424271	0.38892	0.393808	0.622405	0.393867	0.279185	0.361261	0.426958	0.406725	0.259583	0.366902	0.116047	0.532082	0.383654	0.17265
BRD-K16195444	oxymetazoline	28	0.305768	0.404111	0.521693	0.420229	0.44785	0.417518	0.403225	0.852117	0.753409	0.287009	0.647491	0.291222	0.411423	0.4249	0.456227	0.395242	0.405707	0.390012	0.483829	0.360502	0.334894	0.375387	0.372328	0.348878	0.297767	0.370784	0.376199	0.14449	0.300754	0.0022651	0.32075	0.436439	0.411913	0.375134	0.361634	0.704956	0.410264	0.335123	0.380009	0.410256	0.393064	0.164416	0.312093	0.0543887	0.478517	0.323474	0.271569
BRD-K84571636	BRD-K84571636	28	0.306988	0.392221	0.507815	0.479145	0.41594	0.45131	0.351702	0.797198	0.75343	0.314224	0.541945	0.350456	0.41666	0.496988	0.429774	0.476569	0.402362	0.386299	0.567319	0.380306	0.390928	0.40653	0.424773	0.363373	0.304501	0.395857	0.374086	0.306551	0.361451	0.00511519	0.350492	0.40176	0.394773	0.358663	0.403087	0.57786	0.42565	0.289345	0.363019	0.437052	0.406302	0.451206	0.416349	0.253908	0.432081	0.344066	0.159966
BRD-K38449220	seneciphylline	28	0.307977	0.376768	0.492031	0.417768	0.418085	0.423373	0.36302	0.837581	0.805838	0.305635	0.532409	0.303051	0.461137	0.417178	0.407651	0.394328	0.403958	0.400339	0.431997	0.364085	0.343929	0.384266	0.372332	0.412324	0.315271	0.38007	0.381139	0.230098	0.308817	0.0115997	0.338362	0.409102	0.411009	0.349949	0.361704	0.621511	0.410142	0.332087	0.366936	0.415353	0.379842	0.277113	0.352738	0.125462	0.466725	0.373577	0.310082
BRD-K96319534	phentermine	28	0.308415	0.442618	0.532534	0.43288	0.324959	0.401518	0.440278	0.319832	0.824877	0.274017	0.717579	0.332475	0.418316	0.403706	0.441662	0.475155	0.406008	0.407187	0.33569	0.369053	0.389143	0.377827	0.403861	0.405548	0.325037	0.369352	0.372443	0.262184	0.35684	0.0023529	0.353132	0.41658	0.422337	0.376544	0.37957	0.21226	0.432086	0.336956	0.377281	0.422865	0.378263	0.268331	0.374864	0.0919654	0.565612	0.419002	0.252441
BRD-K07996107	harpagoside	28	0.311018	0.385123	0.495551	0.415114	0.403263	0.416221	0.373473	0.811141	0.8163	0.318348	0.600185	0.314414	0.424291	0.421782	0.433735	0.40415	0.405916	0.389413	0.49567	0.35732	0.403435	0.370239	0.388868	0.4332	0.320478	0.371706	0.374206	0.30818	0.364017	0.00156057	0.325792	0.424454	0.409882	0.369869	0.366125	0.654522	0.419474	0.306995	0.370304	0.410006	0.398953	0.279227	0.340809	0.0800434	0.498481	0.413438	0.315388
BRD-K32610195	androstenedione	28	0.311746	0.424843	0.522321	0.49239	0.47336	0.472009	0.381415	0.832391	0.780984	0.375309	0.631029	0.438196	0.511597	0.467872	0.402264	0.481253	0.394169	0.421261	0.540356	0.434806	0.338043	0.43444	0.397295	0.367912	0.332044	0.420881	0.365688	0.330473	0.350583	0.0472977	0.388382	0.393085	0.422448	0.392563	0.439241	0.700056	0.456571	0.39117	0.370917	0.443398	0.474799	0.4213	0.374975	0.206738	0.528627	0.413606	0.26657
BRD-K73700643	BRD-K73700643	29	0.292757	0.388592	0.505891	0.42539	0.512996	0.439275	0.384209	0.86957	0.722893	0.262099	0.674419	0.292952	0.413531	0.414785	0.449662	0.395197	0.408769	0.411007	0.509995	0.360629	0.346449	0.379303	0.37475	0.325955	0.30111	0.361629	0.360008	0.105915	0.326409	0.000722035	0.322357	0.432792	0.419145	0.360639	0.369184	0.690816	0.415721	0.339288	0.369711	0.426021	0.382948	0.174489	0.302902	0.105307	0.515914	0.30061	0.213392
BRD-K04010869	prostaglandin-a1	29	0.293793	0.408046	0.512535	0.409258	0.49468	0.440177	0.387865	0.864875	0.783539	0.290812	0.678783	0.30011	0.43097	0.429514	0.442863	0.429728	0.410126	0.388947	0.514544	0.356649	0.378624	0.380331	0.407282	0.346458	0.316868	0.362645	0.368368	0.103025	0.340307	0.0104178	0.347835	0.432147	0.404109	0.359931	0.365754	0.703894	0.419121	0.315839	0.371764	0.413983	0.400068	0.185937	0.334968	0.0761972	0.526958	0.303411	0.178968
BRD-K40530731	hyoscyamine	29	0.295686	0.394649	0.51685	0.430259	0.45435	0.429638	0.408226	0.872143	0.729404	0.313764	0.714414	0.293408	0.441481	0.41838	0.460672	0.399702	0.406795	0.387549	0.519832	0.358324	0.358017	0.37638	0.399959	0.329756	0.314654	0.366046	0.371438	0.104009	0.319773	0.00438157	0.332543	0.440852	0.401145	0.361342	0.363535	0.705611	0.409991	0.327868	0.376988	0.412059	0.371271	0.164243	0.305374	0.107613	0.494954	0.282228	0.174985
BRD-K46836114	BRD-K46836114	29	0.298566	0.401423	0.503655	0.451854	0.505295	0.453442	0.383371	0.873225	0.7625	0.345106	0.757056	0.300031	0.442318	0.426305	0.405073	0.399268	0.411591	0.402226	0.454662	0.374723	0.362385	0.398742	0.414072	0.317914	0.304022	0.355291	0.372844	0.111459	0.320075	0.00110254	0.343754	0.442498	0.422062	0.410627	0.387187	0.721985	0.440435	0.310016	0.385738	0.429216	0.403519	0.167972	0.348355	0.0777221	0.543757	0.322386	0.110508
BRD-A73581086	ergometrine	29	0.298801	0.397687	0.545346	0.405483	0.417115	0.422703	0.377369	0.838837	0.777662	0.257852	0.601062	0.288013	0.425082	0.375815	0.464671	0.441231	0.402056	0.389531	0.43396	0.357873	0.35765	0.366879	0.390653	0.381758	0.322314	0.382608	0.380961	0.201996	0.351503	0.000590114	0.329259	0.446736	0.413354	0.348922	0.364326	0.669206	0.396624	0.323119	0.367622	0.417491	0.359989	0.184466	0.313099	0.109141	0.537581	0.288821	0.214653
BRD-K68095457	palmitoylethanolamide	29	0.299479	0.381055	0.486417	0.409647	0.472309	0.414151	0.364259	0.854205	0.726221	0.288413	0.616478	0.291837	0.455266	0.381171	0.435767	0.395124	0.405404	0.378623	0.511947	0.361371	0.367643	0.381397	0.378843	0.364768	0.309216	0.358847	0.362348	0.129418	0.31797	0.00843634	0.33015	0.416238	0.413339	0.365403	0.353839	0.68464	0.416429	0.326258	0.366931	0.4116	0.379754	0.190044	0.334305	0.084253	0.467361	0.374757	0.327162
BRD-K62609077	scoulerine	29	0.301914	0.393291	0.501601	0.416894	0.436072	0.407893	0.350116	0.866222	0.740249	0.308499	0.604878	0.285951	0.42125	0.42124	0.453225	0.39415	0.402807	0.38514	0.42089	0.357202	0.347803	0.374009	0.378746	0.427238	0.320474	0.368212	0.372184	0.140577	0.343991	0.00609483	0.324	0.446109	0.410875	0.330999	0.378846	0.711533	0.403361	0.299095	0.362738	0.411669	0.395132	0.196335	0.300296	0.0991235	0.475943	0.2948	0.211944
BRD-K78294846	osthol	29	0.303682	0.4088	0.528458	0.451238	0.476583	0.444967	0.42575	0.871277	0.779435	0.301326	0.565018	0.304755	0.413269	0.434581	0.481177	0.441116	0.405548	0.392274	0.512417	0.372636	0.332384	0.38239	0.371915	0.388085	0.319939	0.385053	0.378346	0.241968	0.308071	0.00118955	0.34575	0.441274	0.411033	0.354943	0.374688	0.652844	0.403929	0.326714	0.375559	0.416625	0.383755	0.212352	0.319462	0.131315	0.499475	0.307716	0.206259
BRD-K91301684	noscapine	29	0.304212	0.388645	0.501931	0.416956	0.445783	0.435493	0.37783	0.889047	0.75913	0.301975	0.663956	0.309316	0.458676	0.432867	0.459532	0.385061	0.407968	0.387243	0.515208	0.358923	0.357258	0.377079	0.390746	0.392768	0.311869	0.369371	0.373135	0.131776	0.328504	0.00463513	0.313653	0.454903	0.418393	0.361886	0.360203	0.714101	0.407995	0.326414	0.379811	0.416455	0.382944	0.2071	0.309259	0.161906	0.43779	0.306487	0.205015
BRD-K23583188	lavendustin-a	29	0.305291	0.428801	0.53191	0.459027	0.451053	0.436353	0.407779	0.876862	0.72687	0.292518	0.673469	0.319629	0.48242	0.449725	0.487521	0.436296	0.408047	0.399622	0.512482	0.372761	0.354602	0.392235	0.382878	0.337748	0.31848	0.374828	0.38936	0.134899	0.323669	0.0125344	0.34072	0.452133	0.411061	0.362515	0.380819	0.726412	0.417848	0.333489	0.383063	0.418721	0.40791	0.163723	0.327064	0.117549	0.487052	0.314062	0.256777
BRD-K77641333	naphazoline	29	0.305447	0.385815	0.474999	0.424724	0.460549	0.41841	0.389791	0.869616	0.774623	0.275214	0.695545	0.303973	0.494981	0.373952	0.43112	0.367585	0.405476	0.399521	0.54245	0.355639	0.360921	0.380479	0.381223	0.365132	0.308667	0.358276	0.375437	0.152929	0.306224	0.004879	0.33758	0.426109	0.415122	0.369371	0.366675	0.741546	0.418778	0.347524	0.379321	0.421085	0.379249	0.163661	0.318806	0.073061	0.507288	0.326559	0.256187
BRD-K28667196	fillalbin	29	0.306446	0.373792	0.507568	0.436453	0.394645	0.420343	0.3716	0.825629	0.733203	0.308159	0.506426	0.311456	0.403556	0.404682	0.428045	0.393823	0.402378	0.400143	0.41433	0.354255	0.324845	0.381227	0.357744	0.416167	0.307097	0.377398	0.378162	0.213077	0.325369	0.00960751	0.326697	0.421863	0.418839	0.342948	0.376437	0.61068	0.403539	0.336316	0.361517	0.411025	0.380895	0.229444	0.342305	0.144026	0.459892	0.345992	0.283071
BRD-K97799481	theophylline	29	0.306848	0.296055	0.391594	0.459965	0.390982	0.389345	0.347958	0.881138	0.755804	0.346543	0.722597	0.313249	0.409936	0.447421	0.33572	0.399956	0.410042	0.392678	0.517471	0.36526	0.331505	0.395951	0.447343	0.306366	0.385683	0.344156	0.391849	0.154491	0.290586	0.0735419	0.378798	0.387586	0.427022	0.419689	0.411106	0.575534	0.480324	0.299321	0.357503	0.424436	0.397776	0.246208	0.370416	0.270024	0.520309	0.474458	0.145084
BRD-A71816415	pravastatin	29	0.30713	0.437101	0.532773	0.404163	0.410926	0.412998	0.388596	0.82992	0.80368	0.336377	0.653646	0.299968	0.470671	0.506167	0.444706	0.478864	0.405608	0.386364	0.479902	0.367856	0.373304	0.380966	0.392979	0.415793	0.325332	0.385448	0.363318	0.2597	0.338546	0.00040032	0.344567	0.432074	0.409727	0.383089	0.374224	0.679129	0.415512	0.331518	0.377651	0.427191	0.393896	0.205535	0.33364	0.0696473	0.559504	0.38849	0.296636
BRD-K96144918	mead-acid	29	0.307638	0.383435	0.50162	0.438987	0.42644	0.438116	0.377629	0.847549	0.73755	0.336592	0.598741	0.282815	0.39515	0.427764	0.449681	0.38731	0.402355	0.412	0.482905	0.369284	0.320536	0.377132	0.356774	0.426502	0.307276	0.381728	0.386082	0.240435	0.325708	0.00172108	0.339961	0.416336	0.417016	0.357254	0.372196	0.637992	0.409423	0.324729	0.367936	0.414107	0.380222	0.217948	0.328911	0.154753	0.471772	0.321661	0.248542
BRD-K22429181	retinol	29	0.308006	0.357284	0.498538	0.462742	0.443015	0.440679	0.32259	0.821424	0.765068	0.305931	0.518416	0.368013	0.458699	0.403464	0.373188	0.473883	0.392212	0.433615	0.523818	0.396274	0.333373	0.401467	0.395544	0.383865	0.30222	0.411314	0.39664	0.314474	0.359921	0.00816491	0.358692	0.369542	0.418306	0.378265	0.408793	0.645013	0.431909	0.317782	0.342174	0.419639	0.454894	0.407762	0.412284	0.230274	0.456987	0.377147	0.192261
BRD-K25186396	tangeritin	29	0.30837	0.426315	0.562011	0.485019	0.507077	0.465584	0.407323	0.889286	0.77482	0.321004	0.713569	0.330116	0.489136	0.464425	0.473225	0.419253	0.407275	0.404951	0.54335	0.374334	0.386859	0.397384	0.415162	0.338703	0.321705	0.364918	0.381061	0.122612	0.331779	0.00560721	0.350351	0.447074	0.401463	0.380387	0.392623	0.751515	0.440165	0.323073	0.376913	0.424731	0.398233	0.233839	0.332045	0.154107	0.514443	0.289348	0.2498
BRD-K45401373	betulinic-acid	29	0.308832	0.414259	0.516769	0.454514	0.431246	0.441306	0.394766	0.841284	0.78342	0.331345	0.605996	0.29627	0.47958	0.468375	0.467941	0.441958	0.40513	0.407029	0.469822	0.373404	0.344582	0.406819	0.382205	0.415287	0.307494	0.375229	0.386911	0.241527	0.322943	0.0010248	0.349756	0.430163	0.413917	0.350835	0.382255	0.679267	0.423342	0.322899	0.371957	0.435596	0.386917	0.275773	0.356511	0.124381	0.510014	0.267463	0.174073
BRD-K41170226	deoxycholic-acid	29	0.308989	0.373074	0.510911	0.501878	0.455629	0.465919	0.361996	0.834404	0.722457	0.342966	0.640246	0.410223	0.465378	0.434615	0.396718	0.46771	0.394892	0.45255	0.542534	0.416844	0.346623	0.418425	0.402759	0.30434	0.315775	0.406665	0.394106	0.294463	0.340032	0.000666099	0.359597	0.374859	0.421511	0.377521	0.437565	0.688295	0.437516	0.360012	0.348982	0.43005	0.472851	0.381409	0.414901	0.244248	0.542467	0.399186	0.244297
BRD-A87719232	naproxen	29	0.310563	0.404335	0.503563	0.402664	0.419011	0.408983	0.358237	0.839518	0.774183	0.258402	0.583809	0.301978	0.465364	0.390955	0.425535	0.393647	0.401931	0.40809	0.47993	0.353096	0.364282	0.367217	0.367686	0.412318	0.32589	0.370903	0.36547	0.203624	0.341148	0.000663859	0.333104	0.427434	0.404284	0.373997	0.374202	0.641063	0.406985	0.288945	0.364892	0.408902	0.362105	0.170189	0.332161	0.116672	0.467933	0.326279	0.194197
BRD-K92760278	riboflavin	29	0.310628	0.39814	0.513684	0.428337	0.437113	0.417445	0.398639	0.850919	0.821007	0.311197	0.623244	0.309006	0.378306	0.455627	0.460309	0.432658	0.404417	0.410635	0.45151	0.371853	0.361463	0.38866	0.388389	0.389902	0.346218	0.38332	0.383516	0.242206	0.331558	0.0127104	0.356248	0.434502	0.423055	0.374281	0.379262	0.557161	0.428592	0.33793	0.371882	0.421126	0.396997	0.270945	0.383543	0.127454	0.530991	0.371382	0.198851
BRD-K96527333	dehydroisoandosterone	29	0.31069	0.432589	0.484886	0.413612	0.40451	0.408193	0.373923	0.821417	0.790675	0.325859	0.498578	0.288775	0.428124	0.427593	0.441702	0.435131	0.399929	0.404044	0.399475	0.361217	0.338817	0.371009	0.368096	0.425936	0.316704	0.395905	0.381177	0.252575	0.330017	0.00161544	0.331832	0.436454	0.411741	0.35154	0.364011	0.649605	0.398374	0.370739	0.376474	0.41384	0.381323	0.235243	0.332558	0.115961	0.457247	0.356839	0.291843
BRD-K25650355	physostigmine	29	0.311354	0.362404	0.506031	0.411328	0.361816	0.392344	0.355885	0.340706	0.465173	0.288845	0.636803	0.306958	0.328604	0.38981	0.426298	0.423875	0.404132	0.407707	0.486468	0.369458	0.378424	0.381128	0.363368	0.436094	0.327255	0.369549	0.374342	0.261627	0.343971	0.00987267	0.342708	0.416428	0.426376	0.377193	0.367673	0.233663	0.439475	0.31025	0.368719	0.429472	0.380985	0.293777	0.375289	0.084985	0.484683	0.434356	0.311516
BRD-K07888107	depudecin	29	0.311393	0.386057	0.523609	0.509482	0.498755	0.47627	0.374558	0.854976	0.785206	0.35119	0.599868	0.387412	0.435265	0.520253	0.438233	0.479448	0.40294	0.387973	0.486924	0.38616	0.351201	0.410613	0.459708	0.359418	0.302814	0.393894	0.367206	0.288776	0.400499	0.0035494	0.359092	0.406235	0.416394	0.350328	0.417589	0.625666	0.429162	0.317698	0.369383	0.451	0.4279	0.463329	0.414672	0.223962	0.510696	0.333216	0.149784
BRD-A65550283	ginsenoside	29	0.31229	0.406151	0.549691	0.432494	0.398947	0.408811	0.377675	0.871835	0.761653	0.300231	0.576014	0.297033	0.454662	0.452383	0.43062	0.425786	0.403807	0.405027	0.45609	0.37109	0.341861	0.374843	0.373833	0.41396	0.33507	0.392594	0.389394	0.294707	0.356343	0.00222061	0.338601	0.454384	0.414602	0.368268	0.371301	0.711427	0.421782	0.32727	0.379251	0.423048	0.369454	0.248194	0.319168	0.120225	0.495378	0.348384	0.236644
BRD-K97509413	coumestrol	29	0.313032	0.389198	0.495288	0.427249	0.40331	0.419752	0.364186	0.827595	0.788209	0.303739	0.498421	0.288679	0.430576	0.404341	0.447425	0.400048	0.402949	0.416262	0.424508	0.366375	0.31982	0.371692	0.348829	0.436747	0.300903	0.377618	0.384971	0.238729	0.315716	0.00328489	0.327271	0.414945	0.416592	0.354007	0.361068	0.643867	0.416444	0.329862	0.364771	0.404362	0.375265	0.246117	0.342911	0.159289	0.426757	0.304415	0.258151
BRD-K82561139	ricinine	29	0.314279	0.440698	0.508185	0.430587	0.428861	0.424692	0.431571	0.854009	0.81561	0.301742	0.66599	0.311801	0.404649	0.453895	0.468996	0.448786	0.404928	0.404563	0.475972	0.376894	0.360001	0.388448	0.386347	0.389826	0.324062	0.386021	0.388075	0.28118	0.324165	0.00387727	0.353301	0.446888	0.431957	0.390342	0.380265	0.5168	0.428474	0.330407	0.378317	0.426775	0.38995	0.26245	0.389047	0.131454	0.524161	0.390164	0.25738
BRD-K59570838	homoveratrylamine	29	0.31438	0.394953	0.45584	0.433465	0.425044	0.439368	0.366007	0.793784	0.756828	0.33558	0.578817	0.329377	0.370448	0.443317	0.471749	0.492486	0.406629	0.40127	0.53428	0.352288	0.325361	0.381377	0.42832	0.38415	0.312645	0.358291	0.383629	0.379638	0.321738	0.0727125	0.342442	0.408562	0.422061	0.379818	0.388637	0.596676	0.386809	0.332742	0.364644	0.432418	0.396413	0.345188	0.395947	0.161912	0.427569	0.390477	0.25348
BRD-A75455249	kavain	29	0.315913	0.414378	0.500658	0.43754	0.398089	0.440985	0.396368	0.831969	0.768268	0.292463	0.660335	0.346511	0.4566	0.48659	0.420722	0.453093	0.399201	0.425652	0.497958	0.392555	0.384277	0.405571	0.390995	0.383719	0.326269	0.38695	0.38376	0.249796	0.362709	0.00126539	0.348828	0.40935	0.428605	0.380966	0.402364	0.630016	0.426854	0.357645	0.361989	0.425052	0.428997	0.223986	0.376116	0.124141	0.517939	0.43681	0.322866
BRD-K60511616	pravastatin	29	0.317058	0.447936	0.5508	0.448975	0.403663	0.446935	0.401407	0.849586	0.759395	0.313853	0.63958	0.339665	0.483067	0.478743	0.444033	0.470792	0.402331	0.413975	0.548985	0.381802	0.366071	0.392497	0.390216	0.380644	0.333754	0.405611	0.384598	0.303965	0.338428	0.00133748	0.327395	0.431053	0.429736	0.390131	0.383992	0.714472	0.422072	0.349383	0.369858	0.422014	0.417763	0.233804	0.350361	0.1262	0.543754	0.399658	0.295626
BRD-K80684056	cantharidin	30	0.182878	0.622661	0.635465	0.615977	0.464381	0.819344	0.440528	0.900953	0.37182	0.559588	0.66924	0.255163	0.667991	0.457635	0.187078	0.499021	0.395184	0.00677917	0.487831	0.244812	0.0542607	0.272586	0.220729	0.0821591	0.22513	0.623911	0.204537	0.0530184	0.166526	1.4486e-08	0.241119	0.23837	0.131836	0.345315	0.628643	0.854304	0.216366	0.0905139	0.225633	0.25429	0.130081	0.213753	0.0283073	0.0389227	0.479792	0.0131005	0.000533257
BRD-A41112154	oleanolic-acid	30	0.302648	0.457935	0.548722	0.3927	0.414199	0.434859	0.438523	0.877438	0.823877	0.28301	0.603644	0.33302	0.445495	0.505452	0.493562	0.463723	0.403098	0.391825	0.565055	0.343561	0.344515	0.371593	0.391726	0.37624	0.316417	0.378891	0.373076	0.208155	0.353755	0.00152405	0.331441	0.446203	0.416676	0.32749	0.347373	0.73992	0.388941	0.335662	0.377401	0.418032	0.387435	0.232706	0.291262	0.0572363	0.527946	0.345363	0.272655
BRD-K81847782	scandenin	30	0.302741	0.459214	0.547393	0.422318	0.445752	0.443696	0.403596	0.853445	0.812745	0.285142	0.611511	0.336986	0.448003	0.466059	0.477309	0.402669	0.405258	0.383575	0.478351	0.353901	0.335639	0.379374	0.389318	0.406904	0.32142	0.399207	0.36817	0.225179	0.358705	0.00173818	0.334203	0.436666	0.412631	0.357047	0.374516	0.786827	0.401603	0.282903	0.375204	0.422017	0.408211	0.201575	0.343973	0.105065	0.535095	0.353037	0.181421
BRD-K80353807	khellin	30	0.307182	0.479426	0.40071	0.378363	0.426946	0.45534	0.358095	0.901576	0.830129	0.243869	0.727235	0.274849	0.417659	0.505853	0.347975	0.434157	0.417631	0.384369	0.461527	0.356674	0.289248	0.382268	0.438378	0.400019	0.342887	0.321238	0.339664	0.319119	0.372927	5.8647e-07	0.322181	0.389127	0.423893	0.478158	0.40283	0.491963	0.417979	0.371958	0.389865	0.446565	0.438321	0.15236	0.392002	0.151257	0.521724	0.431681	0.1704
BRD-K70799801	quinidine	30	0.308745	0.482803	0.530051	0.468202	0.503216	0.485452	0.453733	0.870986	0.818411	0.338733	0.499635	0.360248	0.507154	0.521467	0.498974	0.471139	0.408278	0.400502	0.465652	0.380375	0.33408	0.404146	0.433549	0.396701	0.311858	0.404171	0.387432	0.270989	0.324789	0.0105248	0.3662	0.475415	0.402688	0.397223	0.397697	0.706965	0.420445	0.356191	0.393305	0.42066	0.418585	0.234007	0.375824	0.128369	0.456463	0.248344	0.19058
BRD-K01815685	indole	30	0.309441	0.430516	0.448506	0.482572	0.415856	0.426521	0.380776	0.834737	0.828125	0.404515	0.736442	0.318241	0.401812	0.454363	0.349999	0.448868	0.399594	0.419827	0.554846	0.421363	0.319779	0.407366	0.412375	0.407279	0.336922	0.37429	0.380181	0.243816	0.356976	0.0106414	0.378224	0.371866	0.436619	0.370404	0.436851	0.635016	0.524693	0.392134	0.338807	0.436485	0.422026	0.300469	0.354609	0.0980602	0.587427	0.391055	0.227993
BRD-K19360254	ergocornine	30	0.313844	0.4048	0.524622	0.443858	0.484501	0.433343	0.388254	0.856499	0.798718	0.346649	0.528537	0.298072	0.45911	0.44933	0.443189	0.45069	0.401158	0.4002	0.467252	0.374322	0.36021	0.382197	0.374711	0.404753	0.31614	0.388001	0.375515	0.270721	0.33039	0.00164413	0.337539	0.436178	0.403141	0.366977	0.374756	0.692582	0.411628	0.355033	0.371912	0.422993	0.391398	0.261483	0.363628	0.139578	0.448726	0.357298	0.28635
BRD-K04412738	tramadol	30	0.314483	0.377374	0.44706	0.405713	0.480739	0.443782	0.35806	0.742101	0.852083	0.380049	0.556683	0.342322	0.467878	0.473513	0.454303	0.449498	0.409999	0.377594	0.512041	0.36559	0.33486	0.360186	0.428376	0.309271	0.360886	0.356368	0.375227	0.277023	0.238959	0.0416296	0.365225	0.376748	0.415113	0.392996	0.362839	0.647808	0.407222	0.300758	0.354885	0.406768	0.395284	0.29699	0.403005	0.05731	0.420201	0.322471	0.806071
BRD-A39747742	estradiol-valerate	30	0.315211	0.407043	0.485142	0.412613	0.436291	0.416821	0.378228	0.870889	0.756955	0.346051	0.55503	0.286799	0.476338	0.398615	0.438967	0.424082	0.403719	0.400612	0.44655	0.373392	0.372337	0.378221	0.374696	0.429861	0.339279	0.363365	0.386819	0.204295	0.343686	0.00304644	0.367056	0.426345	0.412552	0.351256	0.362431	0.683994	0.439133	0.347117	0.360405	0.412135	0.388429	0.209789	0.316743	0.100308	0.507207	0.346292	0.315489
BRD-A51393488	noscapine	30	0.316249	0.384793	0.483323	0.453804	0.432253	0.415615	0.36955	0.858345	0.762105	0.318925	0.577888	0.288544	0.4301	0.393938	0.432263	0.427595	0.403328	0.409786	0.459128	0.372143	0.332898	0.380802	0.368171	0.424577	0.306289	0.378993	0.38572	0.282925	0.329972	0.00337962	0.344543	0.435798	0.409469	0.350329	0.37342	0.67048	0.409798	0.324325	0.360941	0.412734	0.37602	0.249209	0.319809	0.141273	0.453532	0.315445	0.326263
BRD-K25591257	resveratrol	30	0.31698	0.347383	0.584709	0.551513	0.486358	0.411544	0.395174	0.888449	0.855162	0.333803	0.674292	0.331512	0.427521	0.485111	0.464175	0.457682	0.406169	0.413973	0.563935	0.434196	0.349234	0.414635	0.400014	0.399714	0.389723	0.397766	0.378854	0.270694	0.398065	0.0017432	0.366311	0.469403	0.422802	0.419823	0.467704	0.714385	0.47667	0.335279	0.376025	0.441839	0.4069	0.254669	0.357413	0.186984	0.609983	0.366616	0.206991
BRD-K54771420	glycocholic-acid	30	0.318456	0.401632	0.516205	0.434287	0.391909	0.421433	0.411347	0.795396	0.756004	0.307428	0.686144	0.365312	0.433035	0.436617	0.418652	0.436565	0.402436	0.430646	0.465076	0.397777	0.386847	0.402428	0.384664	0.402847	0.328773	0.38578	0.388448	0.277498	0.366601	0.00726271	0.357539	0.406763	0.431582	0.392561	0.4003	0.534901	0.447014	0.338167	0.360266	0.429186	0.428341	0.292371	0.37174	0.10976	0.560125	0.462544	0.353608
BRD-K97440753	dihydroergocristine	30	0.319412	0.40717	0.529	0.465795	0.414895	0.44183	0.381304	0.878999	0.811673	0.357497	0.600677	0.309647	0.43896	0.465405	0.440587	0.425295	0.405291	0.406883	0.43833	0.375899	0.332626	0.388122	0.36964	0.42349	0.313773	0.401037	0.381521	0.280132	0.344662	0.00479217	0.337411	0.443347	0.410282	0.355614	0.395706	0.700335	0.424512	0.34603	0.378065	0.420024	0.377386	0.274098	0.35371	0.182906	0.464309	0.311349	0.277899
BRD-A18246003	monoethylhexylphthalate	31	0.261812	0.386159	0.307152	0.414411	0.33927	0.386912	0.307309	0.781146	0.906428	0.446088	0.735121	0.327809	0.221907	0.360893	0.159311	0.280223	0.383967	0.461142	0.558809	0.400085	0.124675	0.362037	0.388819	0.429469	0.283166	0.359103	0.366213	0.0589719	0.289059	2.58683e-05	0.324525	0.23365	0.474957	0.344998	0.431751	0.406027	0.66616	0.456562	0.233692	0.39498	0.410205	0.159136	0.327194	0.123353	0.583109	0.344802	5.23423e-05
BRD-A84205515	estriol	31	0.300963	0.38958	0.509384	0.44701	0.467391	0.439895	0.387734	0.862248	0.722449	0.320137	0.651225	0.307043	0.418723	0.413928	0.438259	0.379319	0.407152	0.40585	0.442704	0.363891	0.365532	0.376207	0.382333	0.340542	0.299462	0.370484	0.375305	0.12323	0.315886	0.00940073	0.320862	0.44381	0.411505	0.359978	0.375108	0.695211	0.401046	0.32994	0.370178	0.412773	0.391094	0.191756	0.317265	0.133672	0.481388	0.286041	0.227301
BRD-K15262564	mupirocin	31	0.305028	0.308868	0.383662	0.44879	0.395755	0.367502	0.314117	0.850282	0.716319	0.259993	0.745742	0.312861	0.368362	0.405185	0.285372	0.3494	0.403329	0.398938	0.333611	0.359652	0.351281	0.383693	0.396442	0.31101	0.359314	0.349054	0.385308	0.13728	0.295323	0.042774	0.33452	0.364617	0.441566	0.420018	0.405732	0.507469	0.455641	0.28876	0.348156	0.423695	0.396515	0.324903	0.365103	0.229698	0.482652	0.486265	0.120046
BRD-A51182606	chloramphenicol	31	0.306763	0.345209	0.389203	0.510542	0.447886	0.375131	0.355224	0.847616	0.732322	0.276593	0.773441	0.342161	0.411226	0.418946	0.344708	0.396889	0.411764	0.429851	0.341356	0.378943	0.341303	0.401788	0.475506	0.364352	0.370517	0.345262	0.392214	0.125007	0.28187	0.07384	0.35421	0.354802	0.441321	0.426372	0.450144	0.53587	0.465384	0.275907	0.367161	0.429491	0.400094	0.225929	0.419401	0.251667	0.581212	0.467333	0.092887
BRD-A70449690	forskolin	31	0.30694	0.494695	0.698807	0.518392	0.526417	0.417861	0.51977	0.855855	0.825614	0.383979	0.788814	0.421851	0.496913	0.549198	0.551399	0.495484	0.422215	0.466279	0.592628	0.408454	0.348751	0.372484	0.405202	0.263457	0.397215	0.337547	0.395139	0.059828	0.378312	0.000412585	0.317042	0.441396	0.413247	0.372929	0.422609	0.69264	0.495108	0.358749	0.370612	0.461517	0.442555	0.372621	0.363338	0.205778	0.699025	0.318871	0.157808
BRD-K17110974	aristolochic-acid	31	0.3071	0.397568	0.575231	0.482063	0.512415	0.424245	0.444839	0.847168	0.773461	0.295633	0.716814	0.369882	0.359869	0.471595	0.476994	0.45531	0.407179	0.405789	0.572294	0.438138	0.354184	0.43656	0.3923	0.367875	0.371036	0.360846	0.372227	0.188793	0.363456	0.00112936	0.391649	0.44402	0.435477	0.437246	0.444563	0.660274	0.499923	0.308819	0.377373	0.453296	0.478616	0.264569	0.401677	0.0647849	0.541263	0.314037	0.18749
BRD-A94669766	naringenin	31	0.310001	0.425752	0.508412	0.437506	0.430387	0.422481	0.414512	0.867467	0.808216	0.301879	0.652436	0.328251	0.413312	0.471936	0.475964	0.431909	0.405282	0.400988	0.475729	0.375328	0.356207	0.384641	0.402611	0.37033	0.331899	0.374921	0.385201	0.262264	0.340411	0.0106422	0.353358	0.424003	0.422362	0.378019	0.388641	0.540752	0.443754	0.332349	0.371401	0.426616	0.395278	0.274176	0.38309	0.140292	0.515652	0.36955	0.182957
BRD-A10070317	propranolol	31	0.310122	0.431966	0.455443	0.414666	0.458726	0.417723	0.368188	0.785224	0.782041	0.321161	0.539429	0.302527	0.471483	0.41559	0.440843	0.459262	0.402841	0.422745	0.540268	0.351713	0.298604	0.358445	0.367805	0.387552	0.322364	0.368	0.375278	0.280797	0.288661	0.011852	0.314389	0.362421	0.42361	0.378993	0.342549	0.610558	0.369545	0.307324	0.356898	0.410294	0.391349	0.201398	0.361676	0.26948	0.463129	0.377535	0.179938
BRD-K81521265	dicyclohexylurea	31	0.310333	0.426291	0.496446	0.423014	0.396413	0.426926	0.395057	0.832439	0.801085	0.28846	0.652391	0.329942	0.475981	0.493715	0.432838	0.47005	0.406472	0.394544	0.515845	0.366595	0.412062	0.393249	0.411064	0.421593	0.347133	0.379971	0.370383	0.221855	0.346369	0.000442881	0.354545	0.441307	0.418288	0.383786	0.381233	0.643034	0.433071	0.33439	0.386507	0.43329	0.395248	0.232956	0.369845	0.0650101	0.596666	0.419977	0.272142
BRD-K54790157	trioxsalen	31	0.31151	0.395512	0.487962	0.415462	0.389072	0.416384	0.372938	0.8121	0.812989	0.275155	0.633787	0.303873	0.452317	0.452066	0.389759	0.440567	0.40352	0.400616	0.511907	0.367289	0.391827	0.382233	0.39627	0.430157	0.345336	0.375514	0.376216	0.226084	0.321703	0.000912427	0.35053	0.417689	0.418652	0.395341	0.381562	0.614122	0.42993	0.317247	0.3651	0.422229	0.398311	0.243964	0.35756	0.0954235	0.536516	0.39984	0.296506
BRD-K09900591	caffeic-acid	31	0.31166	0.326301	0.414843	0.485955	0.428383	0.378023	0.353091	0.850041	0.752086	0.279291	0.735358	0.341522	0.440024	0.483911	0.326579	0.378685	0.406218	0.398984	0.499465	0.36673	0.349354	0.386064	0.411745	0.320684	0.385465	0.355092	0.39339	0.167309	0.29193	0.040763	0.334768	0.375958	0.438802	0.421122	0.420103	0.503403	0.468953	0.273305	0.356685	0.432878	0.400658	0.23635	0.374487	0.292223	0.510867	0.508063	0.101024
BRD-K02715688	hydrastine	31	0.311951	0.446362	0.513416	0.441559	0.416083	0.447653	0.417459	0.852933	0.836717	0.302787	0.704384	0.3252	0.486592	0.485657	0.45036	0.477854	0.404474	0.390616	0.528525	0.36911	0.402467	0.39422	0.424208	0.407043	0.344337	0.391941	0.375293	0.173527	0.35387	0.000853228	0.361449	0.442652	0.421158	0.39806	0.392531	0.665739	0.438481	0.314593	0.379399	0.436531	0.408246	0.229706	0.374028	0.0628221	0.582168	0.411616	0.227951
BRD-K12260308	xanthoxyline	31	0.312483	0.407323	0.489394	0.416091	0.374597	0.416363	0.384685	0.829711	0.779952	0.303285	0.640932	0.307021	0.446222	0.43037	0.399856	0.451589	0.405325	0.390465	0.495391	0.361466	0.361114	0.388926	0.38969	0.423402	0.318879	0.363829	0.365878	0.23183	0.350311	0.00374968	0.339671	0.414264	0.415822	0.374442	0.375786	0.615974	0.423581	0.310655	0.364144	0.425442	0.38664	0.2784	0.363939	0.0971707	0.544603	0.413781	0.359239
BRD-A31800922	procyclidine	31	0.312587	0.351436	0.420828	0.461791	0.450641	0.386919	0.361503	0.817087	0.738044	0.310459	0.688849	0.316022	0.431704	0.458637	0.329954	0.389257	0.408387	0.397248	0.522796	0.369811	0.357866	0.399539	0.417487	0.32564	0.376451	0.351696	0.393457	0.222294	0.320341	0.0395067	0.363327	0.373145	0.445835	0.431218	0.400362	0.608216	0.461616	0.301302	0.357481	0.440561	0.410132	0.26399	0.380991	0.265917	0.488872	0.481227	0.178464
BRD-K55591206	epigallocatechin	31	0.313981	0.381655	0.489969	0.462514	0.432316	0.440182	0.369116	0.785494	0.72685	0.311614	0.615104	0.362457	0.381381	0.442241	0.414275	0.479047	0.400766	0.419157	0.560026	0.390294	0.373624	0.404122	0.421438	0.373317	0.318491	0.392884	0.380739	0.309481	0.355232	0.00750159	0.357122	0.388631	0.428404	0.386527	0.403736	0.602781	0.434455	0.335069	0.352839	0.431563	0.426749	0.35055	0.407215	0.164515	0.513726	0.416756	0.238057
BRD-A22143024	estropipate	31	0.314919	0.397946	0.506589	0.417794	0.393785	0.406387	0.39302	0.826903	0.770583	0.28446	0.639775	0.309398	0.40268	0.437379	0.411271	0.430807	0.400637	0.40883	0.49908	0.370852	0.383584	0.377727	0.384584	0.431283	0.332688	0.387397	0.379634	0.263799	0.352986	0.000817698	0.352346	0.414071	0.433867	0.390749	0.371269	0.531938	0.42854	0.32559	0.371777	0.42278	0.390397	0.253152	0.378951	0.0944002	0.498228	0.424836	0.297297
BRD-A53131506	epitestosterone	31	0.320281	0.416815	0.501176	0.414481	0.412118	0.420107	0.40433	0.851654	0.806728	0.330333	0.641671	0.314473	0.469673	0.439385	0.438614	0.443167	0.403378	0.403101	0.48272	0.375184	0.396164	0.387765	0.405309	0.441407	0.339741	0.388162	0.371819	0.258437	0.350205	0.0170017	0.361931	0.42439	0.415147	0.363936	0.369825	0.638268	0.434801	0.338102	0.378936	0.421353	0.386455	0.300351	0.335486	0.0638108	0.491973	0.428597	0.375281
BRD-K77390737	xanthohumol	32	0.297546	0.443394	0.534828	0.554857	0.505599	0.56275	0.403716	0.86774	0.831293	0.281636	0.533395	0.390748	0.501237	0.530913	0.426993	0.518983	0.398014	0.382997	0.638883	0.389778	0.323024	0.442117	0.426336	0.340615	0.307273	0.392368	0.393398	0.172994	0.375622	0.00248319	0.440351	0.44777	0.414794	0.381141	0.466173	0.680218	0.434121	0.268285	0.340374	0.453135	0.442988	0.349709	0.471369	0.312645	0.498396	0.249869	0.0286108
BRD-A61899133	catechin	32	0.298208	0.360845	0.503579	0.380185	0.408219	0.392073	0.326905	0.840526	0.748446	0.23927	0.525266	0.275434	0.380565	0.417379	0.501128	0.407605	0.394668	0.382166	0.36357	0.354386	0.332429	0.360935	0.355666	0.404065	0.31137	0.38165	0.371907	0.156171	0.36886	0.000421045	0.3169	0.452763	0.424276	0.301882	0.357035	0.672217	0.379969	0.306581	0.37025	0.42127	0.346129	0.240778	0.307282	0.0792322	0.458304	0.351908	0.266628
BRD-K85013741	auraptene	32	0.30092	0.419303	0.525392	0.414691	0.426215	0.426305	0.374764	0.873527	0.74337	0.310898	0.681419	0.304331	0.440682	0.414869	0.432543	0.374803	0.405214	0.387358	0.486208	0.35922	0.347676	0.376208	0.379243	0.346249	0.284501	0.370968	0.371206	0.150469	0.328004	0.00370435	0.322595	0.424122	0.411969	0.364972	0.370042	0.714578	0.405397	0.338935	0.378193	0.409566	0.379441	0.174206	0.301327	0.150556	0.514226	0.327577	0.215012
BRD-K57546357	prunetin	32	0.304439	0.467777	0.514523	0.393217	0.325659	0.383457	0.364399	0.855011	0.766076	0.277623	0.510509	0.291667	0.456033	0.477225	0.465489	0.384396	0.402637	0.378785	0.443106	0.355322	0.372257	0.36585	0.365433	0.426103	0.311117	0.376245	0.372551	0.333807	0.306704	0.000679032	0.321503	0.404869	0.405451	0.344714	0.352637	0.713291	0.381023	0.306304	0.367548	0.409604	0.367414	0.234973	0.299744	0.0718352	0.467293	0.374069	0.449461
BRD-K88969189	ethinylestradiol	32	0.305937	0.369842	0.406627	0.396544	0.388337	0.473286	0.406747	0.880046	0.887506	0.256225	0.558303	0.305717	0.553385	0.498395	0.374443	0.472992	0.412315	0.385573	0.446184	0.357815	0.32823	0.402117	0.464328	0.310048	0.35387	0.362072	0.398742	0.284283	0.349638	5.23066e-06	0.358644	0.391307	0.4475	0.423654	0.389	0.784606	0.406872	0.361323	0.367087	0.441007	0.404016	0.241442	0.389226	0.164028	0.568585	0.436859	0.2546
BRD-K51418664	mitomycin-c	32	0.308034	0.306372	0.406197	0.479433	0.400158	0.375435	0.353245	0.800507	0.701637	0.28878	0.646515	0.356302	0.350679	0.375601	0.314848	0.370883	0.409357	0.398239	0.519178	0.376145	0.339646	0.390762	0.418487	0.282368	0.366991	0.348118	0.387702	0.12752	0.30127	0.0784994	0.339802	0.369296	0.440837	0.466297	0.411525	0.675563	0.487661	0.308292	0.350237	0.438917	0.410412	0.185411	0.377838	0.193162	0.436352	0.479161	0.118361
BRD-A19053259	pseudopelletierine	32	0.308623	0.386625	0.475626	0.389636	0.396972	0.413725	0.350461	0.805118	0.751781	0.27895	0.63045	0.308854	0.429455	0.415028	0.407606	0.414496	0.40367	0.396103	0.485443	0.365817	0.38669	0.374427	0.367467	0.439279	0.29959	0.381958	0.363617	0.254683	0.355062	0.00212457	0.324896	0.409877	0.41759	0.355824	0.362294	0.582119	0.409215	0.296716	0.365844	0.421463	0.39064	0.27046	0.34964	0.0791454	0.516868	0.419504	0.32448
BRD-K55191674	benzylpenicillin	32	0.309864	0.395193	0.502891	0.423053	0.389115	0.403973	0.408191	0.805875	0.76045	0.244246	0.619952	0.31162	0.392603	0.4604	0.430859	0.422853	0.408182	0.394042	0.525105	0.373134	0.357914	0.384987	0.376144	0.378924	0.331139	0.369436	0.377684	0.195372	0.324209	0.00153301	0.349975	0.40467	0.419918	0.3785	0.370692	0.519369	0.44211	0.311676	0.36759	0.429568	0.379884	0.277419	0.349821	0.0822056	0.495583	0.43155	0.329945
BRD-K47693913	evoxine	32	0.311749	0.414029	0.515318	0.420948	0.428866	0.426166	0.385901	0.869152	0.753403	0.303487	0.609782	0.294865	0.433	0.401308	0.455061	0.415238	0.406731	0.406073	0.447557	0.354455	0.365503	0.36932	0.37254	0.42088	0.305026	0.379611	0.375436	0.22142	0.349034	0.000278653	0.325355	0.442076	0.416642	0.345134	0.364547	0.672761	0.393261	0.314267	0.366138	0.422965	0.3617	0.203649	0.322414	0.138381	0.5026	0.32852	0.265235
BRD-K91733562	secoisolariciresinol	32	0.311892	0.398222	0.493957	0.449414	0.437918	0.442455	0.360861	0.807329	0.776364	0.307333	0.584136	0.325048	0.402264	0.478032	0.466713	0.484151	0.405771	0.387157	0.549567	0.357778	0.338222	0.378233	0.436056	0.389307	0.325933	0.371984	0.382805	0.336718	0.316881	0.0194403	0.348222	0.398813	0.429754	0.384115	0.386999	0.614631	0.387918	0.327259	0.367897	0.429602	0.398166	0.303283	0.386815	0.107358	0.454253	0.414429	0.294634
BRD-K11905747	spectinomycin	32	0.311976	0.311258	0.373577	0.46029	0.400443	0.387395	0.339503	0.860855	0.385034	0.286926	0.697922	0.309423	0.335929	0.431447	0.325058	0.36424	0.408301	0.403082	0.323025	0.361011	0.362371	0.390305	0.433159	0.330123	0.358294	0.350047	0.39294	0.178224	0.310212	0.0798383	0.363692	0.362151	0.449125	0.419006	0.411744	0.589787	0.447899	0.278657	0.355471	0.434489	0.393201	0.234252	0.373607	0.228721	0.499682	0.513115	0.114919
BRD-K99595596	salsolinol	32	0.312953	0.402459	0.506415	0.40886	0.40008	0.417424	0.396429	0.785167	0.737061	0.295804	0.567158	0.300941	0.396877	0.405455	0.447025	0.410103	0.406377	0.409667	0.443238	0.372033	0.367733	0.379452	0.358465	0.405035	0.321314	0.379489	0.384493	0.238954	0.350749	0.010318	0.340178	0.423599	0.416221	0.383477	0.362735	0.529185	0.433071	0.325087	0.380215	0.423312	0.375466	0.230652	0.335687	0.11803	0.466214	0.381369	0.254002
BRD-K86161929	cortisone	32	0.313766	0.285456	0.40979	0.45249	0.412712	0.38158	0.31977	0.852679	0.690167	0.336214	0.749886	0.326431	0.416912	0.49917	0.320085	0.350143	0.409556	0.395167	0.469131	0.370291	0.336418	0.401856	0.408563	0.319287	0.367953	0.337945	0.401542	0.139762	0.304453	0.0857349	0.361346	0.371578	0.444075	0.415535	0.406636	0.603513	0.457971	0.295449	0.356742	0.437134	0.401685	0.202135	0.379812	0.181504	0.535414	0.505613	0.106111
BRD-K66043364	noscapine	32	0.314152	0.354399	0.400133	0.472963	0.412113	0.381363	0.367762	0.8543	0.77221	0.316506	0.747648	0.331748	0.436978	0.446863	0.318747	0.38094	0.406529	0.401024	0.499865	0.369351	0.35698	0.390708	0.43823	0.290489	0.37461	0.362399	0.398125	0.204139	0.267269	0.0559713	0.343944	0.37981	0.428665	0.440468	0.408624	0.554845	0.451578	0.306517	0.359365	0.427304	0.401344	0.267237	0.384705	0.284236	0.540116	0.466153	0.172901
BRD-K39965020	doconexent	32	0.314546	0.417903	0.5348	0.45272	0.459523	0.456839	0.403962	0.850934	0.72251	0.31085	0.680402	0.387748	0.512288	0.423344	0.409957	0.403716	0.398602	0.451809	0.521044	0.40971	0.370449	0.407701	0.391634	0.325082	0.305212	0.398956	0.396934	0.250282	0.361756	0.0011116	0.325656	0.404467	0.430204	0.39016	0.407811	0.727395	0.422205	0.369627	0.354673	0.417597	0.447999	0.27705	0.343193	0.169821	0.505095	0.355039	0.277046
BRD-K19295594	gossypol	33	0.174062	0.534297	0.602928	0.715917	0.529662	0.706902	0.425086	0.678205	0.421897	0.327647	0.740024	0.5532	0.663063	0.510791	0.184061	0.367446	0.398259	0.0130722	0.671219	0.38136	0.0907759	0.32466	0.165687	0.0507624	0.60501	0.285393	0.024786	0.285493	0.106857	1.1118e-07	0.334536	0.122549	0.289817	0.161812	0.682375	0.548227	0.173691	0.0387475	0.170184	0.425395	0.256695	0.136266	0.281348	0.00725662	0.499474	0.00250962	8.62976e-08
BRD-A61856038	tremulacin	33	0.299359	0.335791	0.535637	0.568318	0.442344	0.435938	0.479235	0.881892	0.830603	0.334027	0.690508	0.428859	0.279394	0.545333	0.541518	0.620351	0.409818	0.392721	0.648558	0.440211	0.262341	0.435016	0.474139	0.311344	0.405077	0.362987	0.396579	0.201482	0.295357	0.0206701	0.427876	0.434478	0.420306	0.404918	0.524956	0.781339	0.511834	0.325315	0.36325	0.422544	0.532229	0.238937	0.382806	0.0517534	0.490136	0.249799	0.166848
BRD-K04497194	lithocholic-acid	33	0.300631	0.312132	0.375237	0.440018	0.353047	0.419668	0.310259	0.895523	0.917144	0.31596	0.560245	0.348543	0.375547	0.422669	0.311985	0.402312	0.408325	0.41546	0.583469	0.414212	0.311802	0.406081	0.453215	0.282735	0.373524	0.355549	0.386433	0.294191	0.275742	6.23464e-06	0.353599	0.327819	0.43009	0.443761	0.467508	0.601241	0.467488	0.236505	0.359915	0.422923	0.410916	0.149023	0.416878	0.120459	0.412926	0.415576	0.3408
BRD-K26674531	GR-235	33	0.303336	0.503151	0.540377	0.518273	0.502152	0.542416	0.401446	0.851723	0.808496	0.402617	0.49762	0.369398	0.529825	0.535866	0.455815	0.553688	0.402158	0.366432	0.578502	0.376035	0.331825	0.407673	0.472292	0.322306	0.322662	0.420183	0.372914	0.338076	0.346581	0.00229738	0.388026	0.443711	0.396001	0.412805	0.448092	0.728572	0.432157	0.34879	0.397837	0.435008	0.443743	0.309568	0.403826	0.245183	0.449996	0.294008	0.0604526
BRD-K26521938	dinoprostone	33	0.308537	0.399592	0.535606	0.40819	0.422095	0.420068	0.378153	0.824512	0.739108	0.29924	0.602464	0.336027	0.516675	0.413201	0.409691	0.415984	0.399836	0.422303	0.478548	0.38348	0.378508	0.398409	0.346808	0.381764	0.316637	0.371375	0.378296	0.206906	0.362293	0.00125118	0.33082	0.40442	0.422443	0.349379	0.375596	0.708606	0.411275	0.326023	0.353122	0.415218	0.397394	0.225486	0.328389	0.138814	0.533717	0.375279	0.287602
BRD-K82381502	acetylcholine	33	0.308719	0.354014	0.447882	0.48516	0.484005	0.399857	0.404513	0.870705	0.745275	0.262557	0.775007	0.342338	0.473597	0.486386	0.365159	0.41078	0.412944	0.393587	0.550134	0.370181	0.346392	0.406713	0.45452	0.282241	0.381936	0.348336	0.396568	0.101285	0.296789	0.033043	0.354073	0.375702	0.4451	0.416441	0.418285	0.584382	0.473701	0.305989	0.369762	0.436016	0.409595	0.207754	0.398119	0.195425	0.53316	0.498598	0.171715
BRD-K11433652	aspirin	33	0.310279	0.267911	0.395934	0.459201	0.425454	0.36467	0.350519	0.822003	0.668783	0.291404	0.715604	0.326621	0.370564	0.406111	0.320845	0.340056	0.408312	0.399011	0.458808	0.367147	0.358946	0.38606	0.388088	0.344603	0.335673	0.354534	0.390721	0.175225	0.286938	0.0422131	0.330707	0.368109	0.445028	0.414292	0.409037	0.587129	0.471938	0.301698	0.352844	0.442911	0.399562	0.206883	0.369112	0.199174	0.548775	0.50582	0.134326
BRD-K15834839	lobendazole	33	0.310775	0.434655	0.527345	0.419511	0.450081	0.42429	0.441596	0.839994	0.790181	0.30035	0.672448	0.32179	0.449601	0.456152	0.463561	0.461842	0.410186	0.386667	0.524784	0.360838	0.367935	0.381466	0.417756	0.404642	0.345904	0.373828	0.380743	0.27274	0.348752	0.00027702	0.356884	0.416695	0.416778	0.389096	0.379498	0.514444	0.433964	0.292328	0.377751	0.421402	0.407236	0.263166	0.36306	0.0954141	0.546956	0.433079	0.270746
BRD-K51751936	alfadolone	33	0.311738	0.423869	0.556427	0.427317	0.452741	0.429168	0.391132	0.87084	0.773551	0.320251	0.649823	0.315928	0.490727	0.468767	0.466669	0.413127	0.406937	0.404865	0.494529	0.371863	0.357111	0.378949	0.386679	0.387358	0.320969	0.399325	0.375928	0.243266	0.357469	0.000720851	0.332678	0.441823	0.412763	0.374577	0.377293	0.713581	0.413621	0.332165	0.375152	0.432038	0.379967	0.185533	0.321915	0.132422	0.504832	0.325206	0.229946
BRD-K64614248	salicin	33	0.311877	0.421669	0.525976	0.436052	0.45368	0.433964	0.413279	0.842272	0.815043	0.299146	0.652827	0.31809	0.397168	0.447126	0.473513	0.434919	0.404369	0.402501	0.518632	0.3786	0.385307	0.381967	0.382361	0.398842	0.338526	0.381154	0.387576	0.256809	0.35101	0.00108654	0.351823	0.427808	0.421823	0.382481	0.375068	0.557319	0.431328	0.328044	0.375614	0.427138	0.392731	0.260176	0.360502	0.131369	0.532506	0.363909	0.216494
BRD-K34330170	rotenonic-acid	33	0.31384	0.409717	0.505421	0.463793	0.42804	0.434604	0.401093	0.867089	0.797523	0.325101	0.571153	0.297448	0.430028	0.408789	0.467473	0.437598	0.403078	0.401794	0.491815	0.374607	0.333801	0.384037	0.364615	0.424529	0.309683	0.38692	0.382031	0.269927	0.337061	0.000772922	0.357748	0.433295	0.417819	0.349736	0.37036	0.629968	0.415711	0.328098	0.371207	0.422786	0.383133	0.246092	0.346244	0.144707	0.489409	0.320369	0.221605
BRD-K73824630	skatole	33	0.3143	0.425145	0.574753	0.474967	0.53815	0.453999	0.463021	0.862826	0.783013	0.299922	0.709993	0.321875	0.459754	0.396431	0.496538	0.442765	0.409713	0.397018	0.557564	0.38244	0.348391	0.396384	0.397304	0.36897	0.331832	0.374819	0.387888	0.181062	0.347138	0.00203716	0.368907	0.472733	0.428326	0.39346	0.396718	0.751775	0.472897	0.33685	0.399039	0.424009	0.445846	0.19628	0.320904	0.0766816	0.50047	0.317116	0.18383
BRD-K59851896	calycanthine	33	0.316173	0.413523	0.540793	0.422769	0.410675	0.414296	0.375757	0.85679	0.752113	0.321973	0.589182	0.294747	0.429054	0.418553	0.462261	0.410957	0.406255	0.426472	0.476105	0.363861	0.34339	0.374647	0.380201	0.438618	0.330959	0.393822	0.38235	0.223078	0.351367	0.00341191	0.338898	0.444779	0.412987	0.361763	0.362814	0.65657	0.416733	0.347548	0.376262	0.420941	0.381359	0.197412	0.317417	0.135059	0.49312	0.344467	0.23489
BRD-A16444946	acarbose	33	0.316363	0.440357	0.482798	0.428782	0.461999	0.453433	0.362307	0.88297	0.792011	0.294717	0.654969	0.345574	0.35798	0.378173	0.42147	0.471791	0.405143	0.401399	0.565412	0.371314	0.372552	0.389537	0.403551	0.396554	0.315872	0.387841	0.376433	0.272197	0.343562	0.00656091	0.367859	0.42511	0.429214	0.416065	0.379459	0.727708	0.430025	0.329083	0.375966	0.443992	0.407173	0.251775	0.382242	0.11629	0.496571	0.377853	0.244224
BRD-K87226815	cycloserine	33	0.31751	0.384915	0.4776	0.445246	0.299206	0.403612	0.392472	0.375253	0.764458	0.291277	0.361638	0.37284	0.367925	0.495862	0.418855	0.447784	0.407711	0.408378	0.347198	0.371515	0.3721	0.398235	0.452199	0.359503	0.348312	0.378897	0.395296	0.255198	0.368624	0.0119087	0.358629	0.401034	0.453306	0.413314	0.403746	0.334313	0.446247	0.32232	0.381163	0.449755	0.419856	0.277373	0.413469	0.193739	0.35747	0.497596	0.190728
BRD-K10065684	dantron	33	0.318538	0.410709	0.485271	0.425457	0.375458	0.412647	0.376364	0.805138	0.834386	0.325221	0.611275	0.314808	0.463139	0.464383	0.402262	0.453631	0.404113	0.401261	0.48839	0.373433	0.40166	0.393343	0.384856	0.435998	0.328532	0.388573	0.370697	0.26648	0.360194	0.00220574	0.366668	0.425626	0.416107	0.396357	0.381125	0.6254	0.446967	0.353259	0.366982	0.425932	0.385544	0.299843	0.391567	0.102791	0.512548	0.399946	0.322999
BRD-K51095933	estropipate	33	0.31888	0.447729	0.522244	0.404738	0.359455	0.420547	0.389571	0.799582	0.716458	0.32461	0.543292	0.322618	0.416802	0.412599	0.489848	0.459059	0.404166	0.412874	0.490554	0.364644	0.351263	0.363792	0.382786	0.398461	0.333964	0.373755	0.381835	0.310909	0.325792	0.00130307	0.327315	0.411885	0.427926	0.37096	0.354763	0.637908	0.425555	0.335218	0.367871	0.427158	0.393713	0.283597	0.347363	0.139109	0.441456	0.422527	0.325686
BRD-K50660797	epicatechin	33	0.319069	0.429068	0.509975	0.436409	0.372319	0.425666	0.413588	0.797062	0.768792	0.28919	0.632894	0.335109	0.4069	0.438588	0.441973	0.455219	0.407949	0.409549	0.495403	0.373007	0.374729	0.389699	0.406793	0.408589	0.342278	0.384254	0.379239	0.273445	0.360764	0.0099063	0.363036	0.429119	0.426833	0.390398	0.384324	0.529375	0.441962	0.33739	0.375043	0.431878	0.396427	0.310112	0.37891	0.109763	0.524236	0.43281	0.322981
BRD-K14693417	cinchonine	33	0.319347	0.511713	0.554602	0.462321	0.481355	0.459191	0.465401	0.872047	0.841248	0.329785	0.59345	0.319756	0.464183	0.503019	0.503914	0.475758	0.405274	0.413301	0.483791	0.380446	0.37645	0.395478	0.421893	0.398767	0.332528	0.417599	0.39858	0.280802	0.351345	0.00531943	0.360509	0.477479	0.424789	0.408762	0.392743	0.660885	0.444087	0.349128	0.37998	0.424174	0.391236	0.234162	0.366567	0.143862	0.479002	0.324797	0.201897
BRD-A38878059	BL-077	33	0.320367	0.398854	0.504582	0.519599	0.477281	0.48317	0.375421	0.836474	0.783203	0.348893	0.558474	0.418344	0.495999	0.436389	0.387219	0.496133	0.396172	0.451181	0.601939	0.459359	0.349442	0.45773	0.395985	0.365058	0.340434	0.411848	0.397838	0.330517	0.373082	0.0332512	0.416267	0.391137	0.423171	0.390637	0.436129	0.660911	0.483139	0.382328	0.350514	0.44195	0.524323	0.424953	0.408127	0.240443	0.515231	0.419931	0.208993
BRD-K37206356	rhamnetin	33	0.32065	0.463621	0.546619	0.484936	0.449363	0.461277	0.46128	0.845533	0.864001	0.299375	0.702752	0.335018	0.476544	0.482015	0.463079	0.521483	0.412183	0.403164	0.570599	0.396438	0.406367	0.44036	0.434296	0.375746	0.373021	0.380339	0.382659	0.189976	0.390642	0.00157438	0.385751	0.433546	0.410612	0.424545	0.455497	0.598939	0.487366	0.306634	0.37947	0.415329	0.407027	0.286026	0.464462	0.162649	0.5544	0.366357	0.14915
BRD-K91145395	prostratin	34	0.29858	0.394134	0.575883	0.679844	0.450577	0.475167	0.463661	0.893889	0.930109	0.235933	0.714247	0.433713	0.573106	0.641746	0.438384	0.470076	0.408445	0.366799	0.740166	0.395091	0.292481	0.390449	0.430633	0.256529	0.50371	0.361308	0.407118	0.0440759	0.344123	0.059526	0.332412	0.512919	0.433735	0.41305	0.516532	0.790333	0.440273	0.205449	0.350105	0.444258	0.466618	0.119908	0.349771	0.102478	0.685304	0.218222	0.051182
BRD-K97530723	melatonin	34	0.299905	0.3243	0.488939	0.502278	0.43396	0.456698	0.294079	0.891784	0.862952	0.176149	0.703782	0.380818	0.471374	0.489909	0.307158	0.444191	0.403084	0.39683	0.690205	0.380681	0.37748	0.407124	0.490089	0.442275	0.399141	0.355953	0.272879	0.144078	0.364443	0.000588045	0.406647	0.39375	0.426643	0.436572	0.48742	0.536539	0.421549	0.191102	0.336837	0.455177	0.400973	0.40356	0.374325	0.281396	0.549669	0.304327	0.152445
BRD-K30685142	levothyroxine	34	0.306016	0.39605	0.432498	0.39161	0.438382	0.405195	0.324547	0.93577	0.767836	0.293558	0.499998	0.28972	0.35392	0.339998	0.314252	0.410438	0.405189	0.422648	0.370832	0.361468	0.33964	0.397378	0.412035	0.309032	0.345514	0.34651	0.400004	0.212832	0.303659	6.22428e-06	0.352344	0.329269	0.433445	0.417129	0.412691	0.543112	0.412622	0.267723	0.375982	0.414294	0.412828	0.23067	0.426126	0.170321	0.397252	0.43791	0.243921
BRD-A14178283	BRD-A14178283	34	0.310074	0.47429	0.588384	0.569309	0.523309	0.529619	0.398378	0.874572	0.842469	0.354531	0.667845	0.404667	0.541825	0.59186	0.465605	0.519289	0.405594	0.405548	0.646361	0.390211	0.369776	0.404523	0.459688	0.323873	0.34826	0.406544	0.379888	0.301046	0.354727	0.00238199	0.371957	0.437989	0.405368	0.383228	0.464997	0.719001	0.428337	0.326722	0.370947	0.436033	0.457814	0.404648	0.397594	0.250234	0.566786	0.352118	0.117212
BRD-K76587808	fraxetin	34	0.310104	0.405777	0.508435	0.420242	0.463837	0.412939	0.413408	0.855419	0.728748	0.304159	0.679551	0.305997	0.39689	0.410957	0.45411	0.437351	0.405977	0.405201	0.476256	0.365184	0.392526	0.387754	0.380608	0.386033	0.329723	0.368039	0.382022	0.177881	0.344961	0.00151091	0.349986	0.429274	0.424193	0.381654	0.377944	0.620755	0.437746	0.333989	0.374981	0.421947	0.393184	0.20406	0.360585	0.103653	0.51305	0.366299	0.201954
BRD-K84996949	sinensetin	34	0.311811	0.427038	0.555222	0.469581	0.544615	0.45078	0.402948	0.872403	0.781162	0.323853	0.750878	0.312283	0.455353	0.43045	0.453819	0.422199	0.408796	0.401751	0.560606	0.37927	0.376676	0.40054	0.41835	0.358626	0.324847	0.370476	0.382756	0.137674	0.351178	0.00269228	0.345453	0.462873	0.419789	0.384363	0.38963	0.749269	0.456403	0.331449	0.387168	0.43577	0.407262	0.19839	0.347992	0.129099	0.533577	0.295317	0.204269
BRD-A72758037	asiatic-acid	34	0.31261	0.423249	0.519509	0.420688	0.438676	0.429486	0.416934	0.822528	0.783111	0.306078	0.656596	0.307726	0.429519	0.417092	0.480077	0.442885	0.40809	0.409458	0.497501	0.375112	0.388835	0.387861	0.38934	0.415502	0.346101	0.384634	0.383143	0.218916	0.359097	0.00231626	0.356306	0.434703	0.413959	0.378112	0.377405	0.580908	0.44191	0.340998	0.379038	0.427189	0.384049	0.209809	0.372454	0.104332	0.530257	0.371996	0.233385
BRD-K59197931	naproxen	34	0.313147	0.429497	0.470893	0.45412	0.482047	0.46193	0.379243	0.825232	0.839732	0.290133	0.672956	0.332273	0.459244	0.494776	0.472584	0.50941	0.405237	0.379227	0.587792	0.361358	0.350305	0.36997	0.454442	0.382488	0.337534	0.375539	0.389012	0.235752	0.294957	0.0156406	0.346067	0.402956	0.41018	0.396001	0.387697	0.693148	0.384245	0.300982	0.365955	0.428787	0.3976	0.19599	0.370551	0.0996102	0.532506	0.381806	0.255845
BRD-K15567136	papaverine	34	0.3134	0.422814	0.55137	0.51726	0.54821	0.47896	0.400848	0.914321	0.857855	0.356713	0.734179	0.345799	0.395339	0.383731	0.467414	0.421577	0.411896	0.395305	0.57564	0.380676	0.339978	0.416128	0.450443	0.303637	0.333107	0.363712	0.393377	0.183521	0.347586	0.0010792	0.356456	0.454093	0.409281	0.371544	0.430416	0.770597	0.455764	0.312781	0.388146	0.43784	0.427653	0.203205	0.363975	0.125957	0.580358	0.286228	0.143747
BRD-K67102207	phenylbutyrate	34	0.314193	0.330086	0.443326	0.478427	0.453681	0.399098	0.356668	0.852008	0.705465	0.319969	0.709205	0.395195	0.466451	0.449545	0.32114	0.372103	0.399818	0.444092	0.509211	0.407618	0.360923	0.40763	0.395757	0.293614	0.347131	0.372851	0.407253	0.251778	0.327778	0.0329834	0.362387	0.35472	0.445912	0.417512	0.43422	0.623599	0.463054	0.360188	0.344879	0.423659	0.449862	0.305148	0.384181	0.267535	0.524778	0.527379	0.184483
BRD-A54487287	cortisone	34	0.314925	0.375964	0.514582	0.412944	0.441639	0.42315	0.377825	0.848534	0.799077	0.344075	0.633869	0.29433	0.453167	0.443807	0.468408	0.417143	0.405176	0.406824	0.520643	0.37148	0.396252	0.375423	0.371236	0.419236	0.335927	0.382082	0.381709	0.23913	0.375157	0.000216448	0.344349	0.443887	0.416482	0.371466	0.363047	0.568915	0.422588	0.357155	0.373715	0.423369	0.367888	0.171586	0.34662	0.108277	0.530762	0.363425	0.199919
BRD-K60923938	veratridine	34	0.316215	0.415465	0.576465	0.437362	0.424747	0.444451	0.415178	0.873603	0.789436	0.327727	0.612408	0.301423	0.467823	0.459994	0.472974	0.431657	0.40767	0.410997	0.511333	0.367541	0.348677	0.39114	0.372023	0.391513	0.316251	0.391233	0.382904	0.256242	0.353656	0.00109988	0.32112	0.468998	0.418539	0.366984	0.379209	0.705132	0.40537	0.343652	0.384715	0.431316	0.392551	0.184117	0.313905	0.15889	0.525157	0.342853	0.261545
BRD-A75402480	desoxycorticosterone	34	0.320339	0.437022	0.518296	0.419048	0.46857	0.426754	0.398734	0.857414	0.825485	0.372365	0.624978	0.333716	0.483027	0.465743	0.429456	0.48058	0.40639	0.398045	0.498126	0.378795	0.381093	0.399273	0.389403	0.437106	0.342194	0.392029	0.371682	0.265638	0.376806	0.00227759	0.351962	0.426167	0.422728	0.379583	0.382472	0.659974	0.439478	0.354535	0.390317	0.438627	0.419649	0.27961	0.371901	0.0903645	0.55281	0.468591	0.324027
BRD-A25143711	hydrocortisone	34	0.326942	0.42785	0.476691	0.401765	0.397958	0.427869	0.36684	0.872053	0.825231	0.404139	0.491475	0.31989	0.499355	0.491459	0.408565	0.44478	0.405195	0.413486	0.587133	0.401462	0.352875	0.452416	0.357163	0.457279	0.374206	0.402032	0.375266	0.240723	0.388936	0.00760238	0.384416	0.396577	0.416125	0.357348	0.378702	0.675699	0.490074	0.406864	0.368122	0.43526	0.399791	0.302884	0.422858	0.0970444	0.394189	0.446965	0.365641
BRD-A91452556	estradiol-cypionate	35	0.307902	0.441448	0.519153	0.443827	0.504573	0.434066	0.445412	0.872036	0.771909	0.295732	0.724477	0.325626	0.409671	0.432772	0.497443	0.432797	0.408753	0.403857	0.530285	0.373633	0.38557	0.394644	0.404968	0.381988	0.352877	0.375577	0.377392	0.179158	0.339734	0.0092069	0.352125	0.445869	0.424521	0.399981	0.38272	0.649737	0.467358	0.334659	0.382476	0.423358	0.396084	0.246	0.381418	0.0969439	0.58311	0.349889	0.148545
BRD-K36638198	felamidin	35	0.310157	0.399595	0.512146	0.432204	0.40113	0.415203	0.418517	0.852725	0.795307	0.238586	0.615074	0.303795	0.438854	0.436455	0.493496	0.393945	0.404957	0.378019	0.476518	0.367888	0.340394	0.371254	0.389392	0.353399	0.331265	0.353525	0.388061	0.215681	0.305403	0.00248529	0.330828	0.417555	0.39815	0.343336	0.358776	0.713936	0.404303	0.291518	0.374246	0.411397	0.378636	0.22484	0.299852	0.073365	0.517991	0.364511	0.34858
BRD-A74642112	rathyronine	35	0.310579	0.385534	0.514632	0.418167	0.431485	0.399445	0.420187	0.861611	0.77477	0.261293	0.408184	0.301332	0.344777	0.496753	0.51188	0.414342	0.40573	0.405227	0.327004	0.368407	0.411851	0.383999	0.379054	0.393098	0.366121	0.375064	0.38225	0.20675	0.406317	0.000906179	0.335369	0.449809	0.438199	0.357992	0.378594	0.207072	0.437522	0.327042	0.378441	0.432866	0.375899	0.320501	0.378528	0.0893172	0.410739	0.435583	0.271567
BRD-K82236179	dicoumarol	35	0.313381	0.352524	0.420083	0.438934	0.384379	0.441946	0.332224	0.917741	0.844756	0.292213	0.66572	0.357196	0.451165	0.441954	0.308257	0.42435	0.4112	0.421045	0.542891	0.405799	0.315076	0.406287	0.480419	0.349806	0.429253	0.333085	0.401164	0.307692	0.312701	9.45592e-07	0.36206	0.364945	0.443781	0.488009	0.467368	0.448239	0.467194	0.252904	0.367366	0.461038	0.452521	0.183045	0.449618	0.191202	0.46232	0.461509	0.216252
BRD-K67783091	haloperidol	35	0.314684	0.497796	0.511975	0.43762	0.4284	0.448368	0.411537	0.869764	0.791979	0.416404	0.641628	0.377563	0.517496	0.525292	0.487432	0.495913	0.405171	0.402577	0.553511	0.363432	0.295896	0.36784	0.437705	0.359095	0.328173	0.38873	0.367911	0.261288	0.290563	0.013937	0.324567	0.424175	0.426565	0.411276	0.397487	0.72255	0.405194	0.412949	0.385041	0.441504	0.412822	0.21787	0.350219	0.124007	0.523007	0.393099	0.26476
BRD-K63945320	dihydrosamidin	35	0.316802	0.401406	0.502449	0.436286	0.421482	0.426073	0.401171	0.837852	0.796038	0.28866	0.602064	0.320903	0.426533	0.443943	0.432309	0.43459	0.40583	0.401042	0.428576	0.381256	0.386707	0.384432	0.389683	0.399785	0.342804	0.384964	0.384676	0.260389	0.348725	0.0236345	0.350674	0.432206	0.428274	0.38898	0.382513	0.545241	0.430624	0.317834	0.364243	0.425938	0.387931	0.286826	0.369017	0.162913	0.531363	0.395057	0.231532
BRD-K55044200	amoxicillin	35	0.316811	0.359912	0.368869	0.439271	0.390574	0.393621	0.342167	0.872308	0.786739	0.329082	0.738913	0.337715	0.396114	0.460801	0.338178	0.35806	0.412038	0.408091	0.298627	0.387965	0.335873	0.414502	0.460158	0.33315	0.386605	0.341549	0.385389	0.15427	0.281037	0.132377	0.340066	0.358571	0.436296	0.417674	0.408549	0.564721	0.459255	0.320226	0.36126	0.439832	0.414611	0.464969	0.413489	0.205744	0.486474	0.486282	0.193829
BRD-K96119599	leucodin	35	0.31793	0.420827	0.524245	0.411561	0.420683	0.412993	0.407615	0.800929	0.787682	0.303728	0.624463	0.303737	0.434997	0.422827	0.461845	0.438717	0.405938	0.395405	0.479869	0.369013	0.380912	0.380325	0.385379	0.395329	0.329915	0.379391	0.381637	0.255277	0.341333	0.000578349	0.34962	0.425437	0.425226	0.376955	0.366377	0.606678	0.435247	0.344052	0.377888	0.4281	0.383637	0.2346	0.35709	0.113662	0.480745	0.378562	0.258332
BRD-K59522102	piperine	35	0.318218	0.469082	0.522768	0.448745	0.44285	0.449314	0.430736	0.860386	0.804879	0.342238	0.650262	0.335996	0.461608	0.493814	0.463767	0.438396	0.40551	0.405723	0.503317	0.373695	0.36685	0.386392	0.403521	0.394037	0.340823	0.398062	0.387632	0.325175	0.347162	0.0014245	0.354482	0.442039	0.424634	0.398042	0.383297	0.60748	0.436218	0.35232	0.382852	0.431841	0.387159	0.264297	0.375358	0.128931	0.546238	0.350421	0.17062
BRD-K38251852	paxilline	35	0.321548	0.503338	0.569158	0.472364	0.400759	0.441203	0.43401	0.814989	0.794639	0.3583	0.725918	0.404752	0.599138	0.502801	0.462821	0.465713	0.400501	0.459728	0.539255	0.40981	0.325812	0.407127	0.442618	0.28633	0.368571	0.409327	0.402835	0.286621	0.339117	0.00114727	0.336367	0.405618	0.416971	0.375852	0.421609	0.771315	0.444773	0.391316	0.36494	0.429739	0.429571	0.329715	0.341866	0.164581	0.593196	0.409888	0.313118
BRD-K08287586	butylparaben	35	0.324366	0.442066	0.519627	0.425008	0.394628	0.421356	0.409396	0.883336	0.799151	0.327368	0.639417	0.311536	0.453336	0.444908	0.440726	0.444609	0.408347	0.405667	0.501162	0.373066	0.384177	0.387289	0.41117	0.401208	0.341927	0.386933	0.389154	0.312578	0.37703	0.00050014	0.361197	0.436552	0.42206	0.407211	0.375611	0.618726	0.440041	0.341087	0.38289	0.429897	0.38933	0.278358	0.371814	0.129528	0.538708	0.402344	0.195994
BRD-K43797669	genistein	36	0.244383	0.504203	0.637279	0.366885	0.620182	0.588959	0.523707	0.669118	0.560744	0.257869	0.599586	0.484617	0.451194	0.525709	0.520188	0.564888	0.406485	0.4072	0.61289	0.480399	0.167859	0.518814	0.477723	0.314561	0.244726	0.51988	0.518785	0.46003	0.19222	0.00418414	0.475139	0.255404	0.201203	0.330755	0.320652	0.607404	0.250769	0.329048	0.46702	0.504574	0.30618	0.249056	0.203615	0.140619	0.561875	0.399458	0.0572587
BRD-K61192372	capecitabine	36	0.310421	0.38391	0.515636	0.488731	0.476148	0.453453	0.340856	0.837384	0.781148	0.390083	0.615034	0.356558	0.465647	0.523228	0.443535	0.439906	0.404337	0.383879	0.597826	0.396007	0.406108	0.405402	0.4351	0.336617	0.333193	0.39137	0.366453	0.556308	0.416415	0.0130242	0.393262	0.387044	0.400796	0.327811	0.412604	0.605066	0.453847	0.347079	0.363946	0.454361	0.440144	0.552198	0.434438	0.462327	0.482462	0.306462	0.0962667
BRD-K71013094	neomycin	36	0.312506	0.408985	0.402711	0.365923	0.345185	0.41235	0.335135	0.453515	0.849126	0.323979	0.772351	0.322601	0.377804	0.360371	0.337393	0.374825	0.411412	0.372993	0.579224	0.326619	0.35496	0.386405	0.411134	0.365049	0.351789	0.331915	0.37052	0.236995	0.31936	3.18331e-06	0.334556	0.365673	0.444211	0.436747	0.406181	0.341529	0.406639	0.325427	0.377747	0.397394	0.424671	0.173953	0.410537	0.159684	0.44362	0.43823	0.346517
BRD-A43940795	tetrahydropalmatine	36	0.313626	0.411777	0.511142	0.423889	0.440966	0.404526	0.412305	0.834605	0.748377	0.309316	0.678171	0.307304	0.42517	0.426623	0.462775	0.419717	0.406937	0.406014	0.506216	0.370224	0.403713	0.388703	0.400801	0.374114	0.330077	0.379148	0.378943	0.192157	0.343023	0.00134982	0.350587	0.436114	0.428738	0.403782	0.371284	0.586399	0.43551	0.32912	0.375627	0.436705	0.405128	0.244898	0.369541	0.106769	0.538145	0.343117	0.272427
BRD-K22134346	simvastatin	36	0.315136	0.550304	0.653719	0.532002	0.512972	0.467081	0.51406	0.854422	0.818862	0.387627	0.735697	0.461869	0.550929	0.599075	0.519596	0.510505	0.411289	0.43668	0.583881	0.420239	0.356386	0.40212	0.429498	0.290008	0.397148	0.379771	0.37888	0.186923	0.36025	0.00101901	0.299606	0.427062	0.390551	0.429638	0.463757	0.748269	0.473807	0.37771	0.397778	0.43054	0.433746	0.267377	0.344626	0.146085	0.672448	0.339339	0.243152
BRD-A55815733	phylloquinone	36	0.315485	0.305609	0.410128	0.474019	0.44519	0.384362	0.355204	0.862565	0.659379	0.323299	0.689119	0.314968	0.338022	0.468288	0.33578	0.345656	0.406168	0.394106	0.31763	0.359049	0.343289	0.386591	0.416827	0.339117	0.337917	0.362713	0.406104	0.164768	0.300857	0.0364864	0.339004	0.391797	0.438407	0.444097	0.405663	0.586315	0.453946	0.300061	0.354279	0.437325	0.390267	0.252036	0.388875	0.244791	0.486889	0.500592	0.102394
BRD-K13725475	rhodomyrtoxin	36	0.316667	0.570385	0.623161	0.516586	0.412961	0.493173	0.459546	0.863956	0.801726	0.38013	0.726411	0.40967	0.54621	0.544357	0.538117	0.435125	0.401281	0.397842	0.576455	0.385668	0.295295	0.371252	0.420298	0.312474	0.390262	0.403634	0.368514	0.233095	0.336941	0.004308	0.333677	0.451121	0.404287	0.395679	0.468466	0.783025	0.434215	0.375725	0.428373	0.448237	0.384289	0.264835	0.320353	0.108062	0.609269	0.355626	0.175226
BRD-A67479912	progesterone	36	0.31682	0.52358	0.587704	0.454363	0.499533	0.466372	0.434454	0.881081	0.812932	0.447897	0.67138	0.380341	0.564937	0.544495	0.563608	0.467747	0.406532	0.407989	0.491637	0.370613	0.287821	0.379547	0.411319	0.33716	0.338977	0.384771	0.345344	0.203351	0.305791	0.0102547	0.29667	0.394332	0.41688	0.374578	0.401375	0.777868	0.418064	0.437936	0.382199	0.446133	0.427797	0.396351	0.290737	0.102309	0.521651	0.338399	0.158943
BRD-K58938839	cyclopamine	36	0.316855	0.474702	0.533057	0.447725	0.430247	0.422286	0.401976	0.89294	0.83713	0.361976	0.592285	0.31543	0.500794	0.511289	0.478499	0.439812	0.402768	0.385826	0.450143	0.371478	0.352668	0.38083	0.392515	0.382288	0.35995	0.420865	0.380432	0.280043	0.346282	0.00113013	0.325233	0.469091	0.405754	0.376842	0.391538	0.78764	0.413871	0.376418	0.404696	0.419419	0.381187	0.195988	0.304962	0.107374	0.547136	0.343149	0.253475
BRD-K27217864	butamben	36	0.316867	0.401828	0.484239	0.463413	0.388973	0.445616	0.322432	0.884231	0.826082	0.311333	0.569777	0.369232	0.447415	0.480102	0.334393	0.471764	0.410216	0.415899	0.541776	0.388637	0.362853	0.417431	0.456277	0.344355	0.385256	0.387891	0.411698	0.344514	0.328409	1.99642e-05	0.365945	0.387198	0.441781	0.463698	0.462373	0.538941	0.429901	0.24645	0.38778	0.462528	0.422043	0.229103	0.414734	0.210849	0.400034	0.443041	0.202014
BRD-A81541225	oligomycin-a	36	0.317346	0.509099	0.694931	0.574501	0.473811	0.44253	0.489042	0.873732	0.852113	0.368257	0.761465	0.449509	0.495716	0.518398	0.523753	0.457902	0.418073	0.460969	0.595659	0.419449	0.358102	0.396824	0.407422	0.277381	0.405864	0.346121	0.400229	0.0583228	0.403203	0.000557966	0.338549	0.405702	0.38981	0.36681	0.46074	0.699888	0.50471	0.325083	0.344205	0.485041	0.431351	0.453807	0.476718	0.203476	0.696011	0.24276	0.107448
BRD-K20482099	rutin	36	0.318212	0.436915	0.520394	0.4109	0.429376	0.426035	0.400694	0.862939	0.760266	0.311008	0.650718	0.317987	0.395928	0.454548	0.465858	0.441454	0.407037	0.39705	0.508956	0.370425	0.387779	0.386936	0.411813	0.392826	0.339403	0.389426	0.379073	0.25824	0.348895	0.00451767	0.348282	0.424895	0.431159	0.394729	0.372103	0.622272	0.431867	0.342423	0.375084	0.439715	0.387297	0.279284	0.375051	0.130055	0.503651	0.407379	0.268375
BRD-K38323065	phenacetin	36	0.319073	0.414681	0.501421	0.422529	0.40957	0.408174	0.397811	0.832664	0.771753	0.296965	0.652573	0.319704	0.404044	0.420535	0.435582	0.427784	0.405228	0.410154	0.513704	0.371551	0.392968	0.38771	0.404648	0.414913	0.350124	0.373534	0.379535	0.278076	0.352093	0.000311098	0.361439	0.422405	0.42873	0.399164	0.381392	0.527176	0.446358	0.329776	0.373709	0.433778	0.396252	0.25616	0.381634	0.0993934	0.50029	0.453503	0.282456
BRD-A06390036	hydroquinidine	36	0.319192	0.51982	0.524255	0.42844	0.438732	0.433875	0.428584	0.855544	0.812345	0.315956	0.634792	0.32768	0.493784	0.490998	0.440804	0.529798	0.40514	0.393039	0.476045	0.369663	0.387364	0.392932	0.396197	0.454605	0.315814	0.414643	0.37444	0.337445	0.361827	0.000276464	0.354017	0.446977	0.412775	0.397517	0.389441	0.649652	0.420731	0.322538	0.37579	0.426546	0.396422	0.215039	0.356577	0.100983	0.506846	0.410424	0.24138
BRD-A92826379	lupanine	36	0.319613	0.422879	0.524461	0.417381	0.395083	0.426206	0.408585	0.818683	0.789491	0.295292	0.687108	0.312484	0.411146	0.467689	0.448902	0.446107	0.402807	0.395991	0.524554	0.369938	0.415621	0.384224	0.395321	0.423882	0.334643	0.387717	0.364707	0.247737	0.359659	0.000700371	0.358037	0.430614	0.428328	0.399756	0.374196	0.554763	0.435389	0.337289	0.380876	0.435896	0.399904	0.293123	0.374593	0.0884495	0.575577	0.44352	0.300957
BRD-K19227686	phenolphthalein	36	0.319827	0.439605	0.529818	0.456746	0.36975	0.429242	0.450226	0.818996	0.803493	0.322159	0.651504	0.312294	0.464008	0.455347	0.452431	0.434221	0.406802	0.40575	0.544017	0.382228	0.375515	0.384532	0.410455	0.374394	0.364321	0.361963	0.380667	0.239396	0.360746	0.017994	0.363301	0.454642	0.423972	0.381902	0.388696	0.562996	0.462539	0.329335	0.37193	0.427407	0.382907	0.3309	0.343024	0.0846442	0.563646	0.45014	0.295648
BRD-K74212935	ergocryptine	36	0.322865	0.431874	0.520812	0.445625	0.439925	0.430961	0.434548	0.853247	0.855653	0.328714	0.648888	0.309081	0.436323	0.469825	0.467271	0.444223	0.405144	0.408122	0.474096	0.378666	0.379891	0.39724	0.392954	0.417224	0.328892	0.391159	0.398838	0.277403	0.363915	0.0138665	0.360588	0.447277	0.425967	0.386339	0.390663	0.574979	0.435261	0.33698	0.377526	0.42849	0.397104	0.318387	0.379552	0.122339	0.522573	0.393566	0.23096
BRD-A09094913	strychnine	36	0.323099	0.459263	0.52742	0.420613	0.373505	0.414127	0.422161	0.825177	0.817505	0.308994	0.68191	0.315229	0.431855	0.443719	0.480363	0.460752	0.404382	0.397311	0.526356	0.370295	0.383667	0.394606	0.415523	0.409039	0.331289	0.389438	0.379199	0.266801	0.349592	0.000606496	0.363003	0.438071	0.424537	0.39402	0.382915	0.559024	0.4417	0.350888	0.384794	0.43058	0.390345	0.292348	0.368235	0.0887311	0.558082	0.465877	0.354834
BRD-A88080608	equilin	36	0.323459	0.432585	0.533096	0.436393	0.435691	0.414746	0.427569	0.864939	0.80073	0.320912	0.694051	0.338121	0.465958	0.439973	0.47658	0.423395	0.406965	0.398012	0.506646	0.376128	0.379748	0.383785	0.389652	0.407662	0.328055	0.381568	0.39081	0.259093	0.354197	0.0148899	0.339397	0.428537	0.428155	0.39608	0.380528	0.588079	0.446299	0.342478	0.384333	0.43595	0.39608	0.268452	0.369465	0.0891202	0.545726	0.445827	0.241751
BRD-K77830450	forskolin	36	0.324255	0.446005	0.536233	0.439097	0.488502	0.441774	0.416037	0.830136	0.745857	0.305919	0.721098	0.377737	0.534925	0.420325	0.411905	0.443416	0.40036	0.454646	0.573298	0.419245	0.397211	0.419195	0.389362	0.328333	0.345357	0.378506	0.394786	0.228946	0.394036	0.00538441	0.366845	0.421324	0.43538	0.389139	0.396016	0.677579	0.451834	0.363685	0.366509	0.425497	0.448868	0.340225	0.392211	0.119652	0.568018	0.424723	0.33117
BRD-A55416093	colforsin	36	0.32445	0.453449	0.536489	0.423819	0.451857	0.431074	0.427104	0.790388	0.771186	0.310303	0.694824	0.323311	0.454003	0.443165	0.439299	0.47506	0.406999	0.383773	0.591467	0.377497	0.391078	0.394826	0.382075	0.391378	0.362389	0.348573	0.358251	0.243294	0.382509	0.00978116	0.384197	0.434255	0.432902	0.391904	0.372284	0.596409	0.455806	0.312391	0.374365	0.432108	0.436934	0.36485	0.382955	0.0947035	0.522829	0.42949	0.445146
BRD-A62184259	cycloheximide	37	0.256118	0.318206	0.62812	0.66572	0.63133	0.428611	0.5508	0.891037	0.894745	0.0833271	0.875727	0.300292	0.35792	0.39198	0.534826	0.311648	0.397175	0.544457	0.826106	0.352834	0.194566	0.327747	0.350041	0.246867	0.425676	0.267616	0.41937	0.00487513	0.221797	0.00023696	0.377182	0.54395	0.51511	0.313673	0.321657	0.83613	0.526081	0.139832	0.244626	0.357813	0.424949	0.112502	0.219886	0.0206161	0.799212	0.101095	0.052947
BRD-K14349461	pyridoxine	37	0.304408	0.322409	0.442123	0.38825	0.349266	0.35894	0.305496	0.349644	0.583989	0.277069	0.256416	0.300027	0.349175	0.407283	0.300077	0.36899	0.3989	0.423484	0.404628	0.368874	0.352194	0.38511	0.401856	0.430574	0.329836	0.360825	0.399079	0.242978	0.27727	1.37862e-06	0.356003	0.322855	0.441443	0.421084	0.401417	0.225614	0.410853	0.296591	0.362195	0.460697	0.407712	0.224504	0.422443	0.138711	0.359005	0.482455	0.336686
BRD-K17084514	diethylstilbestrol	37	0.311214	0.382842	0.427508	0.424732	0.414859	0.429331	0.33382	0.956892	0.872595	0.263003	0.745653	0.341335	0.346852	0.502583	0.37237	0.460985	0.416385	0.424832	0.549392	0.379839	0.383333	0.39486	0.481896	0.364094	0.390808	0.361727	0.407806	0.298277	0.252483	1.63382e-06	0.370461	0.37271	0.439329	0.454638	0.422601	0.618882	0.450291	0.218179	0.36993	0.445845	0.436555	0.115437	0.400475	0.230132	0.485821	0.466311	0.065769
BRD-A83029311	butirosin	37	0.31353	0.378834	0.436782	0.4159	0.329858	0.411239	0.384948	0.949756	0.918665	0.304905	0.657544	0.336971	0.283416	0.494726	0.324626	0.450868	0.415926	0.402027	0.474752	0.364739	0.361664	0.400072	0.451361	0.359156	0.369446	0.367823	0.357523	0.249973	0.297816	3.42644e-06	0.389628	0.356944	0.433734	0.434909	0.414386	0.556411	0.432962	0.271112	0.362078	0.461578	0.426471	0.286704	0.407173	0.153747	0.523015	0.441634	0.361653
BRD-K02404261	caffeine	37	0.320815	0.393027	0.509292	0.432815	0.40091	0.418167	0.371743	0.851819	0.787095	0.287486	0.690425	0.346926	0.429005	0.373571	0.416977	0.436405	0.398476	0.430547	0.544186	0.388135	0.371305	0.396908	0.406745	0.435719	0.329024	0.390541	0.395122	0.282471	0.367179	0.00228044	0.35786	0.390546	0.435916	0.398142	0.38831	0.636847	0.43662	0.343888	0.360648	0.427213	0.405874	0.243394	0.393173	0.291545	0.549853	0.48267	0.345256
BRD-A48430263	pioglitazone	37	0.322716	0.403541	0.528238	0.42153	0.441261	0.42997	0.394122	0.8583	0.454406	0.276086	0.703639	0.375061	0.493386	0.441448	0.410304	0.446776	0.399747	0.419207	0.547516	0.384925	0.371651	0.393931	0.41258	0.439798	0.332333	0.386899	0.390397	0.312619	0.365009	0.00133552	0.345507	0.399228	0.453319	0.397788	0.383738	0.639293	0.41706	0.328854	0.35648	0.433212	0.429976	0.319936	0.372705	0.127437	0.5507	0.47555	0.273943
BRD-K13819402	desoxypeganine	37	0.324765	0.439463	0.518122	0.429348	0.411786	0.431013	0.408538	0.823954	0.79305	0.314307	0.722011	0.308644	0.43745	0.441762	0.45212	0.432245	0.401949	0.40752	0.517454	0.371273	0.405644	0.385685	0.408656	0.432702	0.342002	0.386039	0.38459	0.293379	0.36617	0.000547671	0.360868	0.436403	0.430951	0.391283	0.387468	0.547202	0.440796	0.326461	0.386578	0.439781	0.386904	0.310493	0.376899	0.0952318	0.555539	0.449251	0.220445
BRD-K25836724	epitestosterone	37	0.326456	0.470438	0.498287	0.42629	0.427388	0.421855	0.434378	0.798592	0.819108	0.307242	0.697538	0.321878	0.442041	0.445886	0.454866	0.475663	0.407103	0.401893	0.504853	0.375669	0.389276	0.388416	0.412342	0.410675	0.352025	0.385603	0.380319	0.269025	0.360895	0.00160172	0.378888	0.425593	0.427124	0.393179	0.378596	0.592665	0.462971	0.35248	0.383296	0.429995	0.38792	0.312123	0.358974	0.0756788	0.554282	0.450823	0.334712
BRD-K84595254	strophanthidin	38	0.258594	0.645627	0.737347	0.714687	0.620782	0.62694	0.654708	0.946645	0.936939	0.150157	0.885469	0.40589	0.656371	0.32001	0.567833	0.262381	0.399037	0.457123	0.839147	0.375319	0.197055	0.283658	0.357546	0.250926	0.618333	0.28798	0.382293	0.0143865	0.265907	0.000980967	0.267323	0.683393	0.691049	0.351759	0.372706	0.917294	0.414518	0.21285	0.284701	0.379777	0.380575	0.101329	0.216844	0.0390745	0.790183	0.113091	0.0331291
BRD-A19232309	1,2-propylene-glycol	38	0.267389	0.344025	0.237568	0.40255	0.272359	0.371661	0.253194	0.752605	0.867841	0.53484	0.729702	0.275657	0.13989	0.292328	0.112845	0.210186	0.377892	0.430766	0.402768	0.399957	0.0966794	0.365302	0.343789	0.42248	0.276711	0.370975	0.369836	0.0374291	0.301881	7.05907e-05	0.331179	0.215245	0.465662	0.309384	0.405744	0.440078	0.675465	0.529113	0.226539	0.426787	0.378567	0.26751	0.289913	0.0439844	0.50754	0.373225	0.0263227
BRD-K09784055	benzo(e)pyrene	38	0.273341	0.378093	0.285274	0.453633	0.321704	0.376115	0.292537	0.770392	0.886875	0.486347	0.824559	0.269073	0.218288	0.343757	0.119377	0.290384	0.38034	0.441738	0.468395	0.411584	0.122047	0.36984	0.376684	0.479948	0.280519	0.349471	0.365869	0.0881491	0.34021	5.28288e-05	0.362039	0.209079	0.485781	0.328589	0.441971	0.340495	0.711696	0.498968	0.224709	0.426145	0.405658	0.321236	0.310455	0.124283	0.514397	0.330549	6.63498e-05
BRD-K63899271	biotin	38	0.309683	0.365964	0.445616	0.434878	0.406551	0.388841	0.331562	0.896108	0.759448	0.277445	0.669662	0.325007	0.388236	0.42474	0.336431	0.466987	0.407252	0.431109	0.468868	0.378394	0.308565	0.404568	0.455145	0.314922	0.411019	0.363455	0.397818	0.308194	0.275727	1.10098e-06	0.396773	0.349514	0.435833	0.411139	0.421187	0.518771	0.425904	0.293687	0.366635	0.465355	0.435001	0.17535	0.402185	0.168708	0.444577	0.459624	0.169138
BRD-A11170096	pravastatin	38	0.31873	0.322307	0.420947	0.452781	0.390898	0.393763	0.341964	0.84887	0.726366	0.322091	0.717444	0.339015	0.484861	0.516958	0.322812	0.347029	0.407878	0.399919	0.493126	0.374005	0.374598	0.391518	0.432442	0.326027	0.384537	0.374015	0.394375	0.170704	0.303447	0.0880081	0.323604	0.370721	0.438293	0.448137	0.41377	0.612637	0.47144	0.317223	0.357503	0.436292	0.397725	0.235477	0.386295	0.186704	0.526111	0.50121	0.125246
BRD-A97437073	rosiglitazone	38	0.319427	0.476624	0.561772	0.43244	0.491542	0.466595	0.418509	0.886903	0.712727	0.273414	0.692593	0.423614	0.529421	0.457783	0.438791	0.462074	0.403979	0.411721	0.61095	0.376282	0.341944	0.405064	0.412699	0.391588	0.309104	0.390098	0.384911	0.259628	0.380907	0.00752224	0.340908	0.403608	0.448977	0.420151	0.388469	0.75968	0.406044	0.335836	0.358653	0.440326	0.469749	0.248416	0.352977	0.128263	0.571266	0.40536	0.227538
BRD-A73605923	mocimycin	38	0.32073	0.439759	0.56641	0.459255	0.45972	0.435408	0.399265	0.884222	0.79271	0.348281	0.604881	0.311612	0.476229	0.473788	0.447682	0.451227	0.408165	0.408695	0.531928	0.368893	0.354463	0.38631	0.392792	0.407278	0.339191	0.385828	0.392032	0.217728	0.346366	0.00195388	0.342933	0.458171	0.41629	0.378009	0.375792	0.679536	0.43483	0.325447	0.377384	0.420619	0.399002	0.191401	0.327076	0.128881	0.526659	0.306978	0.333588
BRD-K37080523	isoreserpine	38	0.322814	0.452894	0.557926	0.481273	0.423973	0.430111	0.418475	0.874399	0.79265	0.343281	0.559556	0.313493	0.486192	0.457355	0.456847	0.43966	0.408272	0.411628	0.502128	0.377259	0.350756	0.391676	0.378738	0.413081	0.326241	0.392508	0.394658	0.271843	0.364798	0.00215154	0.347673	0.463136	0.409205	0.373582	0.385892	0.73973	0.432846	0.311529	0.384676	0.427185	0.383907	0.229688	0.321366	0.183288	0.508859	0.319396	0.268133
BRD-K06895174	cisapride	38	0.327195	0.485616	0.52048	0.445427	0.418601	0.434255	0.423895	0.865335	0.817265	0.354673	0.68187	0.340932	0.445127	0.487589	0.476316	0.490844	0.404456	0.404753	0.546807	0.371894	0.404093	0.391588	0.412388	0.386002	0.342872	0.397435	0.386107	0.284526	0.357266	0.00515575	0.352045	0.452244	0.43502	0.411888	0.390355	0.649287	0.435747	0.355576	0.389857	0.444277	0.394144	0.279949	0.37481	0.137513	0.528405	0.404583	0.230543
BRD-K15502390	nevirapine	38	0.328256	0.387251	0.445407	0.457053	0.41695	0.411145	0.381524	0.860639	0.771372	0.314295	0.687785	0.35252	0.345718	0.462828	0.398159	0.468934	0.40492	0.418182	0.572379	0.367739	0.372191	0.388926	0.414205	0.394539	0.364538	0.387312	0.392867	0.295599	0.341266	0.0374878	0.354327	0.399517	0.450427	0.441663	0.399774	0.62334	0.451016	0.328704	0.371004	0.446569	0.410058	0.341589	0.396342	0.200387	0.525314	0.484012	0.20536
BRD-K98521173	desoxycortone	38	0.329522	0.415226	0.490836	0.4308	0.444159	0.44526	0.386346	0.881826	0.772851	0.379113	0.563289	0.323835	0.477387	0.439144	0.439553	0.42475	0.402964	0.416703	0.457547	0.383252	0.356645	0.387861	0.378583	0.459663	0.331638	0.397641	0.391094	0.244313	0.33864	0.00219158	0.362273	0.441296	0.421315	0.360171	0.372295	0.715869	0.43159	0.383857	0.373799	0.426525	0.393653	0.27653	0.358353	0.187391	0.450072	0.387864	0.3401
BRD-K41260949	valproic-acid	38	0.329598	0.451554	0.606591	0.502748	0.467111	0.453661	0.447146	0.849333	0.728072	0.44414	0.729428	0.456871	0.511046	0.490424	0.419877	0.427077	0.406223	0.52339	0.586919	0.432815	0.395741	0.378055	0.404178	0.304306	0.420412	0.429333	0.433163	0.420498	0.317262	0.00445538	0.301992	0.408337	0.434351	0.432436	0.444575	0.692123	0.467621	0.419838	0.343437	0.411884	0.447055	0.52047	0.355162	0.453932	0.636458	0.368612	0.210159
BRD-K35708212	ouabain	39	0.258059	0.666217	0.723624	0.793846	0.703445	0.676368	0.689091	0.929731	0.907434	0.181966	0.863228	0.39146	0.652093	0.333109	0.55104	0.227515	0.399124	0.45328	0.853769	0.378742	0.188431	0.281624	0.329621	0.276619	0.635991	0.299258	0.366019	0.022086	0.266156	0.00723573	0.239516	0.691293	0.745337	0.323901	0.382092	0.928113	0.369118	0.193071	0.277837	0.396861	0.339349	0.140387	0.225034	0.030055	0.8016	0.135545	0.0219896
BRD-K23478508	digoxin	39	0.260266	0.744577	0.76396	0.745027	0.688012	0.662851	0.698785	0.951895	0.927478	0.156476	0.884077	0.39933	0.740372	0.262818	0.586804	0.202926	0.397066	0.481411	0.882096	0.362733	0.151071	0.24829	0.318279	0.298413	0.683014	0.294384	0.383329	0.0221708	0.237613	0.00261388	0.222286	0.717787	0.783201	0.306341	0.346006	0.944668	0.388596	0.207104	0.270515	0.375493	0.293346	0.0989339	0.153605	0.0148616	0.833264	0.154064	0.0541918
BRD-K39944607	ochratoxin-a	39	0.294782	0.472499	0.561163	0.561903	0.554609	0.467986	0.379612	0.861403	0.817521	0.354089	0.695311	0.459804	0.490889	0.543414	0.478999	0.58696	0.402657	0.4451	0.695105	0.429398	0.372019	0.430075	0.504418	0.286295	0.355761	0.337256	0.338697	0.14524	0.412543	0.000494653	0.452358	0.403167	0.432808	0.418749	0.491093	0.733465	0.553068	0.376808	0.366214	0.49635	0.540764	0.447572	0.560811	0.312307	0.620398	0.209848	0.0748013
BRD-K34730807	levodopa	39	0.301383	0.330855	0.364995	0.355056	0.386376	0.390011	0.291499	0.802371	0.843991	0.273835	0.844466	0.327064	0.382801	0.510728	0.298075	0.440113	0.40864	0.395449	0.326053	0.347124	0.369451	0.388532	0.42195	0.387393	0.317975	0.308235	0.382753	0.151685	0.325315	2.16951e-06	0.360406	0.358853	0.438553	0.397114	0.398149	0.652054	0.400144	0.277498	0.378314	0.441366	0.415409	0.149634	0.438686	0.134208	0.551999	0.524088	0.264408
BRD-K41524689	paracetamol	39	0.310084	0.353508	0.454992	0.412614	0.35945	0.460943	0.375345	0.936344	0.860991	0.23092	0.62812	0.319063	0.362893	0.534569	0.379758	0.482829	0.414985	0.423503	0.60903	0.362114	0.371298	0.410488	0.438339	0.34198	0.412055	0.355619	0.406172	0.194064	0.372915	5.05788e-06	0.406854	0.386378	0.442485	0.407701	0.393622	0.733862	0.426973	0.257425	0.391054	0.449477	0.432494	0.165497	0.411986	0.152423	0.650236	0.488224	0.228781
BRD-K75466013	benzocaine	39	0.312795	0.429524	0.459452	0.406765	0.298356	0.38831	0.311697	0.844016	0.879834	0.277487	0.484372	0.290368	0.385145	0.4665	0.317873	0.461455	0.410289	0.42733	0.498903	0.376768	0.362869	0.405323	0.430705	0.361744	0.394687	0.364762	0.405538	0.351778	0.304463	2.3747e-06	0.357612	0.366958	0.415497	0.43539	0.416222	0.274604	0.437079	0.241763	0.381465	0.473377	0.386079	0.245374	0.420217	0.12881	0.405315	0.514928	0.254909
BRD-K08111712	chloramphenicol	39	0.313942	0.385571	0.404906	0.399142	0.408783	0.400583	0.298353	0.91838	0.804027	0.308059	0.782841	0.319217	0.474387	0.46909	0.299275	0.350181	0.406614	0.383734	0.410245	0.365023	0.36816	0.377357	0.422023	0.380321	0.375001	0.354767	0.353186	0.284991	0.311974	7.23743e-06	0.375378	0.345782	0.419796	0.450685	0.421849	0.654576	0.414149	0.297136	0.374564	0.453641	0.410202	0.216849	0.426306	0.130833	0.520624	0.526215	0.318891
BRD-A01078468	hexestrol	39	0.31714	0.39978	0.388442	0.393587	0.303761	0.384508	0.323757	0.862892	0.828722	0.250722	0.733943	0.3123	0.364361	0.407132	0.311954	0.420138	0.406864	0.422379	0.587192	0.359677	0.363316	0.37691	0.460104	0.40559	0.379428	0.365207	0.399226	0.259452	0.27918	1.01337e-05	0.37249	0.358324	0.433037	0.446867	0.403901	0.677911	0.438238	0.270929	0.375131	0.459428	0.415676	0.141961	0.414724	0.113304	0.472129	0.487776	0.210916
BRD-K65331431	retinyl	39	0.321141	0.438051	0.505217	0.483805	0.506501	0.499504	0.395964	0.852861	0.746343	0.432662	0.522635	0.424008	0.507258	0.466921	0.424144	0.502399	0.396555	0.442663	0.575861	0.450058	0.336412	0.460534	0.41412	0.374527	0.338539	0.434275	0.39163	0.334805	0.380012	0.0378547	0.418935	0.405542	0.420601	0.385335	0.436705	0.686991	0.47667	0.411619	0.364364	0.442994	0.507675	0.375169	0.420044	0.223811	0.44567	0.430928	0.194583
BRD-K17894950	indirubin	39	0.322575	0.502046	0.574812	0.448604	0.475436	0.453467	0.442677	0.81359	0.73606	0.297992	0.569125	0.383181	0.406125	0.508227	0.518625	0.52056	0.403843	0.39891	0.546527	0.37095	0.371274	0.404783	0.419912	0.386455	0.352943	0.393518	0.383634	0.326809	0.358457	0.00332311	0.358038	0.423228	0.444331	0.382329	0.395222	0.699544	0.415934	0.307864	0.370725	0.444489	0.406234	0.326396	0.374025	0.137805	0.456376	0.361855	0.214394
BRD-K59460069	BRD-K59460069	39	0.323258	0.495216	0.556632	0.548598	0.557727	0.566024	0.430972	0.860252	0.791009	0.359455	0.5652	0.456773	0.468519	0.55878	0.4916	0.555545	0.402195	0.436503	0.545435	0.416025	0.342477	0.441859	0.433789	0.417296	0.337347	0.491091	0.38869	0.313397	0.400916	0.00229846	0.403681	0.471139	0.459508	0.414814	0.482199	0.662591	0.420905	0.29394	0.383156	0.452259	0.479355	0.452233	0.467254	0.294607	0.438481	0.288466	0.086185
BRD-K66766661	17-beta-estradiol	39	0.323868	0.382037	0.427067	0.51608	0.522772	0.399272	0.397255	0.846568	0.755917	0.339122	0.704486	0.363803	0.486968	0.421383	0.325785	0.423927	0.407381	0.407796	0.527689	0.397286	0.346424	0.415674	0.435821	0.346364	0.387622	0.35536	0.393287	0.154822	0.312896	0.0873489	0.404958	0.389267	0.443054	0.439997	0.415257	0.630094	0.514077	0.339766	0.357674	0.436742	0.414496	0.258961	0.365005	0.23998	0.552798	0.494642	0.140399
BRD-A33973768	scopolamine	39	0.324035	0.446848	0.454112	0.430113	0.449974	0.445433	0.338631	0.915028	0.901165	0.353874	0.797471	0.388508	0.439159	0.418843	0.373758	0.397961	0.409337	0.387546	0.556458	0.375769	0.431082	0.402903	0.435705	0.42312	0.364134	0.367082	0.366238	0.373829	0.335141	1.50902e-05	0.340926	0.391482	0.42515	0.446107	0.413838	0.557815	0.409655	0.35589	0.382045	0.412741	0.428634	0.142813	0.425487	0.14866	0.48275	0.450688	0.265495
BRD-A36066264	estradiol-benzoate	39	0.330848	0.498392	0.521975	0.488652	0.489021	0.474721	0.46904	0.867793	0.860707	0.380127	0.642314	0.365747	0.467919	0.475756	0.49366	0.483879	0.404365	0.41702	0.531641	0.403225	0.384031	0.415302	0.415258	0.439588	0.36533	0.405415	0.393072	0.266768	0.380981	0.00691733	0.408744	0.460298	0.428641	0.396948	0.398896	0.644029	0.483517	0.36492	0.395441	0.438382	0.401312	0.357698	0.394044	0.12994	0.534265	0.383962	0.194583
BRD-K68552125	phorbol-myristate-acetate	40	0.181713	0.447217	0.749098	0.614946	0.674809	0.547319	0.643148	0.691459	0.813675	0.155019	0.504109	0.432535	0.145918	0.733551	0.556344	0.588167	0.406853	0.143466	0.704123	0.258294	0.0505418	0.343254	0.636947	0.128361	0.201342	0.346715	0.642394	0.00449889	0.572846	0.000638412	0.449555	0.688121	0.363691	0.252499	0.53921	0.681784	0.170277	0.267688	0.400922	0.219249	0.206993	0.00465176	0.136764	0.00616079	0.754649	0.020757	0.0208541
BRD-A71459254	cymarin	40	0.266261	0.688361	0.761906	0.784405	0.766375	0.691567	0.716678	0.951312	0.916779	0.201997	0.889272	0.430207	0.699666	0.378596	0.609226	0.262071	0.410652	0.479415	0.813389	0.40124	0.187993	0.318666	0.357033	0.210831	0.697272	0.310979	0.376687	0.023485	0.269326	0.0010982	0.290494	0.72422	0.716892	0.359213	0.426655	0.916224	0.414413	0.204437	0.304365	0.374289	0.398884	0.111763	0.219297	0.0466583	0.799731	0.116704	0.00904602
BRD-A45333398	periplocymarin	40	0.267214	0.638802	0.710894	0.724972	0.588116	0.612691	0.624608	0.93359	0.908008	0.234889	0.810376	0.406519	0.597003	0.31495	0.588233	0.236841	0.400775	0.482414	0.753474	0.389112	0.166025	0.304182	0.319551	0.252729	0.604875	0.274271	0.409015	0.0366357	0.235129	0.0220346	0.25611	0.627673	0.68063	0.28979	0.37571	0.911429	0.439537	0.218414	0.273084	0.385764	0.394188	0.194487	0.228569	0.0545376	0.757353	0.116617	0.0546499
BRD-K58685305	emodin	40	0.286079	0.422719	0.296048	0.506913	0.328106	0.40807	0.291734	0.825623	0.92739	0.545401	0.738859	0.29552	0.314076	0.41087	0.116926	0.335642	0.381853	0.469238	0.614261	0.442108	0.144652	0.383418	0.401406	0.426895	0.297976	0.332818	0.38156	0.105179	0.347984	5.75901e-05	0.3838	0.22231	0.462799	0.336271	0.472041	0.455715	0.749323	0.457502	0.223694	0.441983	0.403583	0.33276	0.364648	0.0821603	0.559564	0.285823	6.72687e-05
BRD-K92830582	propranolol	40	0.309266	0.378244	0.498679	0.41106	0.321748	0.411212	0.390714	0.936231	0.815493	0.223688	0.598206	0.3247	0.598211	0.462546	0.408015	0.44428	0.420246	0.426819	0.474192	0.374139	0.37252	0.404484	0.44815	0.350073	0.420066	0.358094	0.40217	0.356484	0.34295	3.8479e-07	0.414683	0.368484	0.44863	0.372804	0.398359	0.73281	0.420036	0.272926	0.373701	0.434643	0.408469	0.152869	0.420117	0.0971679	0.587274	0.496421	0.178564
BRD-A52886023	antimycin-a	40	0.313317	0.407749	0.512065	0.589563	0.450604	0.511309	0.340139	0.868016	0.838611	0.356998	0.581029	0.405346	0.444589	0.48985	0.399426	0.532584	0.400972	0.408882	0.645599	0.407899	0.30078	0.423308	0.439384	0.328136	0.331623	0.383644	0.373878	0.250612	0.388862	0.0111439	0.412015	0.375123	0.403867	0.380101	0.513212	0.674842	0.456185	0.324896	0.347682	0.478994	0.447952	0.501233	0.513068	0.236971	0.524723	0.310038	0.0568289
BRD-K23913458	coumarin	40	0.322461	0.427338	0.508781	0.420012	0.411881	0.429374	0.407768	0.814067	0.79265	0.295314	0.711319	0.318108	0.392734	0.42302	0.449886	0.466698	0.403749	0.407581	0.517517	0.370103	0.410923	0.38602	0.402613	0.44286	0.340473	0.389771	0.386048	0.25241	0.361863	0.00176928	0.353517	0.428603	0.428234	0.38187	0.37701	0.560842	0.441458	0.331412	0.379584	0.435703	0.383603	0.291879	0.388554	0.0771213	0.54669	0.456349	0.290656
BRD-A87445400	yohimbine	40	0.326967	0.446559	0.535952	0.433931	0.418012	0.439214	0.433389	0.824319	0.792173	0.317847	0.694999	0.322115	0.414252	0.474054	0.456264	0.471018	0.404138	0.414891	0.497973	0.372785	0.39647	0.388349	0.404889	0.456889	0.336989	0.397916	0.384087	0.247286	0.376374	0.00168527	0.356907	0.430989	0.436667	0.393627	0.384482	0.567047	0.445416	0.357364	0.378761	0.434238	0.391105	0.280594	0.38134	0.0987836	0.536509	0.440609	0.252778
BRD-A95513702	androsta-1,4-dien-3,17-dione	40	0.327567	0.478662	0.519662	0.437478	0.417089	0.44261	0.420042	0.862801	0.822122	0.35427	0.576928	0.340167	0.483281	0.466125	0.43641	0.48067	0.407255	0.401186	0.514725	0.379703	0.392268	0.392899	0.402384	0.447384	0.352724	0.408797	0.375036	0.325131	0.367726	0.0139641	0.385493	0.445416	0.420166	0.395527	0.37833	0.669336	0.454091	0.392542	0.387689	0.437304	0.413372	0.282895	0.321057	0.121912	0.536132	0.418641	0.269643
BRD-A55393291	testosterone	40	0.337059	0.475567	0.524177	0.45033	0.454372	0.443005	0.439388	0.855087	0.83413	0.366062	0.673152	0.357151	0.490769	0.432562	0.458643	0.483866	0.407624	0.41631	0.574714	0.409963	0.380422	0.407949	0.413466	0.47698	0.373617	0.407993	0.378875	0.372409	0.377958	0.0459264	0.41825	0.442045	0.425266	0.407713	0.380399	0.636364	0.497016	0.388568	0.403424	0.444123	0.435389	0.312455	0.37687	0.0736096	0.545811	0.472235	0.280791
BRD-K63606607	bufalin	41	0.270029	0.718755	0.750048	0.792502	0.739823	0.660975	0.680063	0.938882	0.944756	0.193317	0.870122	0.441771	0.708435	0.332628	0.571818	0.217909	0.40348	0.47976	0.870018	0.38281	0.183393	0.309831	0.322571	0.251141	0.67408	0.287291	0.383061	0.0271366	0.281437	0.00188572	0.277774	0.695796	0.753057	0.357112	0.411861	0.931527	0.426793	0.203095	0.288533	0.398457	0.374463	0.150627	0.200216	0.0165498	0.824939	0.13787	0.0323245
BRD-A61273891	aflatoxin-b1	41	0.270218	0.350261	0.268087	0.464641	0.284896	0.363618	0.27802	0.836791	0.902671	0.51386	0.744675	0.284236	0.2069	0.34637	0.120794	0.279133	0.380803	0.452224	0.480611	0.430773	0.102567	0.360073	0.382198	0.451303	0.289601	0.348504	0.359562	0.0810518	0.311241	8.82435e-05	0.354002	0.214482	0.48589	0.330739	0.445658	0.378252	0.700598	0.516834	0.232423	0.442126	0.383702	0.26655	0.298677	0.0584091	0.556833	0.318554	6.32585e-05
BRD-A46747628	ouabain	41	0.271223	0.675626	0.707205	0.760254	0.73809	0.615695	0.650862	0.936227	0.91211	0.237379	0.882215	0.437648	0.656381	0.340907	0.553304	0.246258	0.405764	0.470095	0.821475	0.374715	0.210047	0.324254	0.340015	0.254472	0.637552	0.272732	0.371245	0.0268319	0.259215	0.00136433	0.287642	0.653207	0.722505	0.358553	0.399625	0.904346	0.44545	0.193086	0.286071	0.40402	0.42988	0.154831	0.243725	0.0266893	0.791337	0.145597	0.0182652
BRD-K99712306	yohimbine	41	0.307554	0.386817	0.390177	0.392054	0.447003	0.389052	0.292109	0.917561	0.850494	0.261796	0.652339	0.327322	0.3479	0.493941	0.30848	0.409759	0.403745	0.415211	0.46933	0.344042	0.355123	0.398867	0.431094	0.344601	0.372385	0.353074	0.386742	0.216589	0.271928	8.41624e-06	0.367892	0.315762	0.439421	0.446205	0.422768	0.588875	0.431215	0.309829	0.368628	0.436456	0.431572	0.110298	0.450271	0.110359	0.436338	0.512289	0.242558
BRD-K27853494	phenylpropanolamine	41	0.307703	0.343557	0.432628	0.457317	0.529429	0.428551	0.384013	0.7682	0.89848	0.383456	0.805983	0.334209	0.609029	0.444562	0.371191	0.410665	0.410219	0.418846	0.512525	0.340406	0.409859	0.373198	0.491157	0.303332	0.400383	0.339091	0.380863	0.125103	0.349463	3.14406e-05	0.35989	0.340804	0.423497	0.486933	0.442769	0.563439	0.424033	0.302872	0.368696	0.446995	0.426881	0.25055	0.413693	0.0872205	0.580751	0.351386	0.349697
BRD-A61486721	apramycin	41	0.312208	0.382252	0.488091	0.431438	0.352436	0.424092	0.408779	0.921977	0.81886	0.25214	0.604416	0.322531	0.600676	0.495021	0.380781	0.485946	0.414492	0.411244	0.5861	0.365936	0.399569	0.416759	0.484381	0.374461	0.417544	0.346817	0.396201	0.23278	0.396593	3.76386e-07	0.433766	0.374218	0.453165	0.40638	0.402032	0.664444	0.420943	0.268698	0.378124	0.446691	0.415822	0.254454	0.383381	0.172512	0.632442	0.472625	0.419128
BRD-A20794617	vancomycin	41	0.312341	0.414272	0.466693	0.411856	0.353213	0.450871	0.361165	0.893718	0.846992	0.245686	0.73153	0.329648	0.43579	0.46079	0.323324	0.477642	0.407761	0.425499	0.478619	0.373343	0.341295	0.408418	0.445496	0.334958	0.362661	0.363855	0.402923	0.309157	0.270117	1.2189e-06	0.397679	0.350273	0.447565	0.430554	0.420613	0.528223	0.438326	0.235001	0.373497	0.464207	0.417717	0.247204	0.427908	0.16623	0.623372	0.49765	0.117322
BRD-K49384696	lincomycin	41	0.312567	0.39695	0.438725	0.374236	0.426789	0.396056	0.299503	0.852612	0.836588	0.262164	0.797939	0.374913	0.29237	0.498322	0.293597	0.403603	0.405247	0.417866	0.526563	0.360018	0.369537	0.373264	0.43007	0.422907	0.351619	0.348601	0.400702	0.124065	0.324566	1.35263e-06	0.361703	0.357843	0.444713	0.481557	0.39772	0.690597	0.43434	0.308618	0.370291	0.459988	0.420328	0.147531	0.425926	0.12765	0.539283	0.52003	0.242863
BRD-A25775766	securinine	41	0.314816	0.521979	0.5395	0.431829	0.440446	0.441744	0.440218	0.840326	0.83761	0.312831	0.559006	0.325165	0.499876	0.475076	0.45201	0.488858	0.406437	0.394434	0.485733	0.366027	0.372832	0.386122	0.39666	0.47561	0.331167	0.421024	0.385351	0.268893	0.353826	0.000790155	0.363002	0.486819	0.432363	0.407661	0.382687	0.745854	0.413753	0.313005	0.378364	0.416909	0.397239	0.212434	0.343557	0.108586	0.493776	0.361865	0.199619
BRD-K54556307	ethambutol	41	0.318356	0.350497	0.392666	0.424349	0.376567	0.422971	0.386183	0.90695	0.854744	0.272813	0.802165	0.366506	0.43085	0.478332	0.343147	0.418466	0.414441	0.389733	0.506155	0.361168	0.424178	0.398156	0.466082	0.391289	0.425891	0.341973	0.388538	0.144108	0.291178	7.26795e-07	0.34446	0.374079	0.44216	0.462887	0.429553	0.590377	0.425966	0.326571	0.381312	0.438359	0.460108	0.22133	0.406443	0.172246	0.588306	0.51431	0.301342
BRD-K12567312	dehydroisoandosterone	41	0.319908	0.388998	0.501803	0.441638	0.272263	0.429052	0.391805	0.933065	0.81739	0.263123	0.57583	0.301431	0.429218	0.425477	0.403664	0.43354	0.418864	0.395884	0.541767	0.368145	0.390052	0.400743	0.468849	0.399846	0.420724	0.376142	0.412635	0.327134	0.405149	9.56267e-07	0.414765	0.396539	0.434204	0.434725	0.419173	0.799991	0.426508	0.279108	0.381788	0.40612	0.400871	0.265613	0.400019	0.284006	0.477289	0.435509	0.290973
BRD-K38159897	chenodeoxycholic-acid	41	0.322161	0.370023	0.426857	0.420305	0.298678	0.413946	0.325061	0.86237	0.801609	0.331356	0.795656	0.310914	0.342679	0.542102	0.35823	0.408226	0.40511	0.42669	0.554901	0.378715	0.39336	0.373347	0.428888	0.462537	0.424421	0.371561	0.401663	0.229676	0.323506	1.56116e-06	0.37285	0.394328	0.450827	0.459015	0.431387	0.459289	0.408821	0.353275	0.379977	0.451587	0.408568	0.25008	0.404747	0.163678	0.52085	0.465856	0.331913
BRD-K90553655	testosterone	41	0.33421	0.444404	0.507335	0.459971	0.462676	0.445962	0.415927	0.871716	0.783463	0.385931	0.592639	0.330849	0.437254	0.407658	0.461724	0.442576	0.406729	0.420312	0.481314	0.403008	0.344183	0.405462	0.357604	0.492927	0.351458	0.392695	0.392625	0.373816	0.32837	0.0319461	0.392808	0.435335	0.420211	0.369798	0.372327	0.683939	0.456872	0.384846	0.389355	0.437895	0.407677	0.29324	0.31935	0.157122	0.458804	0.379334	0.315217
BRD-K03067624	emetine	42	0.249263	0.525087	0.81431	0.8502	0.757963	0.589404	0.699502	0.935567	0.962133	0.0627821	0.908359	0.483704	0.399124	0.727233	0.710105	0.423367	0.394582	0.601267	0.966372	0.368726	0.170828	0.407052	0.449114	0.185287	0.683613	0.324952	0.510002	0.000774851	0.18835	9.7549e-05	0.458622	0.639569	0.424868	0.259569	0.362859	0.96972	0.551692	0.205783	0.218591	0.404911	0.525031	0.086337	0.262939	0.00347757	0.85885	0.0988036	0.00174771
BRD-A68930007	ouabain	42	0.278136	0.73653	0.744284	0.757863	0.697657	0.632797	0.685334	0.954172	0.937693	0.181757	0.920888	0.385478	0.655944	0.324306	0.580346	0.253574	0.402314	0.488294	0.851135	0.374202	0.189323	0.288875	0.347441	0.317529	0.664086	0.301223	0.39586	0.0663791	0.276001	0.00213368	0.283702	0.700966	0.737878	0.37326	0.382521	0.941963	0.425198	0.185756	0.298909	0.414139	0.354028	0.130901	0.222043	0.0266466	0.838458	0.235243	0.0569358
BRD-K88043978	amikacin	42	0.307426	0.356328	0.335472	0.400728	0.517366	0.416522	0.317972	0.836674	0.902195	0.27949	0.716937	0.291431	0.586615	0.430354	0.311984	0.406471	0.408047	0.414764	0.53612	0.366717	0.340893	0.38484	0.482896	0.300961	0.385857	0.338695	0.365458	0.113083	0.273027	1.90055e-05	0.354098	0.341011	0.442649	0.459371	0.457784	0.571577	0.470717	0.294991	0.36293	0.466149	0.456996	0.233751	0.396693	0.10108	0.507838	0.531919	0.320337
BRD-K09129322	dehydrocholic-acid	42	0.313452	0.332892	0.385596	0.366482	0.400065	0.394046	0.288189	0.915545	0.87468	0.251811	0.851737	0.304193	0.413554	0.399427	0.298795	0.388581	0.402108	0.423846	0.498917	0.354998	0.333717	0.366287	0.448835	0.452869	0.354722	0.322787	0.401634	0.144694	0.309213	4.91159e-06	0.343682	0.327789	0.460105	0.440566	0.402204	0.57003	0.380745	0.314055	0.369868	0.447897	0.407492	0.124863	0.378013	0.138744	0.583168	0.460603	0.416255
BRD-A11132253	nadide	42	0.31827	0.33556	0.403718	0.408977	0.366858	0.405558	0.308651	0.910014	0.872337	0.274658	0.739667	0.359959	0.303421	0.406079	0.304527	0.403862	0.406144	0.425138	0.498391	0.367595	0.35148	0.388905	0.431785	0.383675	0.382718	0.35893	0.388202	0.212532	0.292028	6.2352e-05	0.341057	0.345817	0.434968	0.449044	0.429404	0.492568	0.422231	0.233359	0.363161	0.425945	0.416373	0.208357	0.447678	0.1474	0.406904	0.490673	0.21239
BRD-K08356259	xylometazoline	42	0.320296	0.397293	0.457514	0.383932	0.474145	0.379471	0.324506	0.928918	0.890839	0.286775	0.737973	0.330641	0.4577	0.364044	0.339173	0.372465	0.399963	0.397138	0.518415	0.342768	0.355727	0.371542	0.411352	0.470368	0.340873	0.331475	0.360732	0.320865	0.322411	3.07503e-06	0.352813	0.353041	0.449261	0.431894	0.395613	0.565788	0.393877	0.362315	0.375486	0.441681	0.418983	0.15309	0.390886	0.0767633	0.551031	0.494183	0.136621
BRD-K59632282	quinidine	42	0.320884	0.533312	0.558192	0.433181	0.462074	0.452804	0.453816	0.87378	0.847948	0.320558	0.586586	0.325462	0.514754	0.548419	0.467649	0.536346	0.405382	0.391637	0.498407	0.369222	0.391331	0.398386	0.411913	0.451005	0.325413	0.424958	0.377084	0.337849	0.363517	0.000691361	0.363775	0.475083	0.41277	0.402309	0.397338	0.747848	0.415705	0.323181	0.384644	0.42145	0.392101	0.200184	0.333158	0.0803098	0.520656	0.343521	0.308226
BRD-K38310698	troleandomycin	42	0.323852	0.338552	0.361266	0.407707	0.403962	0.37397	0.339379	0.875295	0.758961	0.290447	0.784003	0.353358	0.370391	0.450751	0.345732	0.43181	0.401978	0.428361	0.550518	0.360887	0.352917	0.374412	0.414818	0.439379	0.347795	0.378351	0.405859	0.347694	0.333545	2.48642e-05	0.354055	0.346722	0.444971	0.460114	0.407023	0.498988	0.417894	0.379115	0.37472	0.451669	0.44892	0.179032	0.425242	0.155278	0.565272	0.514273	0.328202
BRD-K52930707	rescinnamine	42	0.324314	0.491046	0.610873	0.493772	0.481574	0.464108	0.439066	0.899442	0.8187	0.366405	0.686433	0.340234	0.547821	0.534998	0.498687	0.460111	0.409129	0.395738	0.512974	0.365693	0.364555	0.382849	0.398629	0.377009	0.346799	0.419093	0.3857	0.280551	0.359364	0.00176183	0.326364	0.47408	0.406726	0.383734	0.409131	0.770648	0.419363	0.362778	0.406929	0.427101	0.393993	0.185812	0.311468	0.156993	0.617928	0.343123	0.263245
BRD-K29673530	hypericin	42	0.329399	0.40387	0.510164	0.435157	0.378637	0.4152	0.390389	0.821358	0.794355	0.302384	0.65864	0.311982	0.381588	0.440854	0.436853	0.429274	0.405539	0.403354	0.509028	0.376695	0.382593	0.387525	0.376883	0.428591	0.34831	0.381074	0.383966	0.294409	0.353231	0.00492822	0.353056	0.424942	0.429417	0.385173	0.384905	0.536613	0.439119	0.330559	0.373884	0.427374	0.384698	0.31216	0.374256	0.0861595	0.515417	0.460696	0.391337
BRD-A07765530	epinephrine	42	0.335762	0.365583	0.429145	0.445372	0.421646	0.404161	0.379509	0.883405	0.759482	0.450085	0.605119	0.348131	0.427547	0.389991	0.338122	0.42724	0.409836	0.431385	0.38223	0.397658	0.35801	0.431268	0.402081	0.369189	0.416243	0.375476	0.394616	0.237997	0.345405	0.170793	0.385715	0.38328	0.452414	0.41614	0.410506	0.687091	0.496607	0.389621	0.364931	0.448701	0.415206	0.326731	0.4201	0.189113	0.403631	0.534571	0.202567
BRD-K07572174	curcumin	43	0.166982	0.632454	0.574421	0.511237	0.215193	0.259723	0.49944	0.692497	0.730851	0.0635273	0.455163	0.116228	0.617194	0.562655	0.30934	0.519158	0.387751	0.120358	0.153738	0.0769377	0.0385741	0.41481	0.529486	0.106366	0.061293	0.131638	0.544955	0.589627	0.554997	0.00188348	0.105631	0.119168	0.162483	0.178434	0.531455	0.229629	0.0687594	0.0290509	0.368787	0.121361	0.484392	0.0850489	0.594884	0.531387	0.132445	0.00910969	0.00176014
BRD-A75144621	digoxin	43	0.276579	0.6298	0.697789	0.79917	0.804454	0.567355	0.606518	0.950008	0.927054	0.308984	0.89031	0.334668	0.764829	0.313666	0.449517	0.209422	0.407196	0.448815	0.852363	0.359144	0.141146	0.300041	0.330596	0.227389	0.692273	0.272722	0.379416	0.0468863	0.193528	0.0434279	0.229887	0.609384	0.785345	0.363898	0.414997	0.939514	0.425832	0.19792	0.271705	0.408984	0.426594	0.14848	0.188913	0.0400217	0.780892	0.240051	0.0481014
BRD-A82892199	alpha-tocopherol	43	0.27824	0.24357	0.568252	0.603508	0.688086	0.557851	0.359382	0.860047	0.817928	0.0664417	0.71331	0.430438	0.414713	0.522093	0.343824	0.483845	0.406237	0.356334	0.778751	0.407548	0.418471	0.421702	0.605144	0.48305	0.496195	0.350211	0.154865	0.028907	0.434005	5.41537e-05	0.452106	0.449603	0.405885	0.426278	0.563366	0.498042	0.449058	0.105032	0.329156	0.417349	0.389923	0.618915	0.304721	0.300135	0.670419	0.112842	0.0234228
BRD-K96282009	guaiacol	43	0.309827	0.337057	0.401969	0.392658	0.325637	0.397864	0.351367	0.872235	0.787201	0.274678	0.578151	0.322054	0.530745	0.422971	0.35444	0.40835	0.408813	0.410892	0.456442	0.363132	0.386899	0.418085	0.44633	0.438795	0.373852	0.323094	0.380733	0.39925	0.357523	8.75792e-07	0.381733	0.333082	0.449297	0.400718	0.391602	0.630319	0.398476	0.319321	0.363718	0.449415	0.386189	0.21253	0.412437	0.165609	0.520283	0.462521	0.382747
BRD-A48180038	trihexyphenidyl	43	0.316874	0.378096	0.394141	0.388754	0.304542	0.392233	0.266367	0.907463	0.798964	0.291847	0.673705	0.285971	0.384056	0.350427	0.291637	0.35396	0.403703	0.43362	0.2822	0.375395	0.383493	0.380704	0.409207	0.404955	0.358787	0.364172	0.402687	0.255939	0.310567	1.57141e-06	0.37646	0.342404	0.439574	0.433573	0.419387	0.632459	0.417202	0.259515	0.363507	0.461556	0.394592	0.224764	0.375409	0.11331	0.30373	0.492356	0.328621
BRD-K03557653	sappanone-a	43	0.330241	0.516038	0.547135	0.467113	0.404466	0.449742	0.467789	0.842547	0.830159	0.295112	0.599944	0.335709	0.459408	0.506044	0.462636	0.496294	0.406841	0.430124	0.524547	0.376777	0.387454	0.39811	0.426526	0.445451	0.341897	0.417527	0.400344	0.297158	0.400571	0.000329988	0.382008	0.460863	0.434786	0.419776	0.407848	0.5793	0.44588	0.324353	0.375237	0.43102	0.399852	0.268239	0.390692	0.143272	0.51514	0.397331	0.16353
BRD-K91509126	piceatannol	43	0.336235	0.523543	0.619702	0.534205	0.478454	0.520835	0.475666	0.902244	0.837635	0.390765	0.631524	0.399745	0.570673	0.568356	0.476711	0.521193	0.405145	0.44319	0.547027	0.418791	0.374695	0.438301	0.446263	0.354522	0.386002	0.42813	0.405899	0.315865	0.391005	0.00733571	0.372568	0.474689	0.413961	0.442694	0.480277	0.780005	0.471586	0.398697	0.402988	0.444844	0.4229	0.254461	0.398506	0.214109	0.566514	0.3402	0.191041
BRD-A26002865	verrucarin-a	44	0.259899	0.364328	0.783712	0.80937	0.813771	0.616285	0.633323	0.929037	0.973235	0.157003	0.936915	0.437541	0.376281	0.578093	0.634603	0.481803	0.394176	0.469841	0.98145	0.476495	0.148002	0.533901	0.350233	0.276942	0.608492	0.287044	0.41424	0.000847309	0.293389	5.98208e-05	0.54414	0.589076	0.523062	0.298553	0.444464	0.9436	0.487845	0.114094	0.22944	0.481334	0.60026	0.310322	0.363884	0.0373348	0.785489	0.139835	0.00091983
BRD-K08037784	arbutin	44	0.312465	0.361857	0.440569	0.413069	0.29003	0.431965	0.398431	0.923684	0.805122	0.227325	0.567309	0.315613	0.524574	0.425899	0.392716	0.478755	0.413709	0.425823	0.537665	0.373736	0.399725	0.425918	0.498767	0.374911	0.399458	0.35175	0.4168	0.259209	0.416005	9.90433e-07	0.392265	0.375197	0.451982	0.384293	0.409548	0.747915	0.428814	0.237283	0.376197	0.458561	0.407048	0.28059	0.444528	0.204119	0.521121	0.45292	0.496874
BRD-K14036801	roxithromycin	44	0.313089	0.308271	0.52621	0.421616	0.271158	0.403644	0.37424	0.883771	0.712247	0.285045	0.624055	0.326263	0.421605	0.390215	0.381985	0.43843	0.416232	0.403689	0.530613	0.377501	0.389295	0.411684	0.442774	0.337059	0.374709	0.331899	0.412017	0.328688	0.369297	1.93412e-07	0.407585	0.388256	0.453946	0.408051	0.390974	0.619679	0.421331	0.281407	0.365369	0.449912	0.419964	0.264829	0.433219	0.175841	0.585833	0.504928	0.406029
BRD-A58837096	ribostamycin	44	0.322276	0.398683	0.418679	0.422683	0.375698	0.401524	0.351243	0.947129	0.805851	0.2849	0.710116	0.345476	0.404306	0.405359	0.363184	0.432312	0.410285	0.420594	0.544142	0.375674	0.361534	0.38709	0.439017	0.364829	0.385219	0.379964	0.404348	0.332651	0.291086	1.69594e-05	0.37324	0.381925	0.455786	0.44487	0.403383	0.574722	0.450073	0.270464	0.362641	0.474677	0.415116	0.196524	0.452136	0.169582	0.481657	0.397367	0.290861
BRD-K88741031	methyl-2,5-dihydroxycinnamate	44	0.325061	0.528315	0.545402	0.480421	0.433897	0.520164	0.447165	0.892139	0.840364	0.362992	0.569048	0.330412	0.528832	0.504022	0.492975	0.491373	0.406707	0.413941	0.496228	0.387568	0.377622	0.407872	0.446154	0.429719	0.328558	0.428419	0.401046	0.326835	0.362242	0.00142731	0.359196	0.473153	0.416231	0.408193	0.407582	0.69456	0.445668	0.378501	0.392019	0.430039	0.411404	0.270802	0.390951	0.165707	0.504553	0.314453	0.13276
BRD-K73999723	telmisartan	44	0.325147	0.448742	0.541755	0.455406	0.452474	0.446684	0.399031	0.851527	0.780309	0.355533	0.647238	0.370613	0.465333	0.487505	0.439471	0.510692	0.407281	0.394019	0.600986	0.378007	0.398897	0.413002	0.413066	0.461757	0.348043	0.372961	0.384193	0.28985	0.374626	0.0052356	0.395526	0.422975	0.432615	0.377615	0.398235	0.64653	0.419323	0.301223	0.372324	0.447705	0.427817	0.285739	0.420176	0.111249	0.536669	0.381573	0.207307
BRD-K15744901	catharanthine	44	0.325582	0.428669	0.390324	0.376314	0.35946	0.379302	0.334438	0.890113	0.871974	0.31264	0.73579	0.320155	0.449028	0.483425	0.287203	0.427196	0.405765	0.400208	0.556593	0.35352	0.383749	0.375064	0.464444	0.437162	0.362734	0.358016	0.369172	0.213252	0.316321	8.50805e-07	0.382861	0.375501	0.446298	0.454251	0.403502	0.657624	0.414232	0.318512	0.372169	0.449734	0.410348	0.12673	0.419615	0.193064	0.472018	0.514042	0.424354
BRD-K28542495	benzydamine	44	0.326529	0.41031	0.428685	0.386607	0.351121	0.388677	0.372875	0.899207	0.460275	0.279466	0.769304	0.328768	0.371739	0.416096	0.328559	0.407197	0.404273	0.415826	0.447703	0.362681	0.38788	0.377045	0.409892	0.48367	0.423532	0.377919	0.379017	0.357629	0.295948	1.37957e-06	0.382332	0.385003	0.453975	0.488421	0.417405	0.575219	0.411554	0.369496	0.380215	0.453627	0.421256	0.153559	0.413884	0.149582	0.524749	0.513376	0.379906
BRD-A23290232	westcort	44	0.331613	0.398331	0.429385	0.474163	0.524133	0.39177	0.357615	0.907996	0.764537	0.449111	0.621944	0.40224	0.527861	0.536289	0.335462	0.433868	0.409452	0.413056	0.528298	0.407868	0.341719	0.44123	0.414332	0.345896	0.430413	0.378874	0.394027	0.202904	0.329723	0.144838	0.367611	0.376686	0.430716	0.439652	0.428155	0.700418	0.515641	0.410618	0.373564	0.437341	0.425373	0.271075	0.408181	0.27018	0.422775	0.529155	0.262095
BRD-A25687296	emetine	45	0.273878	0.423787	0.792855	0.783081	0.739685	0.539926	0.720472	0.957523	0.982882	0.0624853	0.955493	0.378178	0.396756	0.613463	0.707808	0.424514	0.400892	0.53747	0.962923	0.40326	0.185495	0.447678	0.430019	0.233427	0.637178	0.30396	0.48631	0.000750775	0.232883	1.71492e-05	0.539771	0.664832	0.474389	0.276051	0.391927	0.966179	0.553597	0.116115	0.239594	0.401111	0.395405	0.136079	0.27269	0.00570526	0.867251	0.16693	0.00995435
BRD-K40476324	digoxin	45	0.274144	0.721206	0.664437	0.706259	0.655703	0.56673	0.532918	0.977572	0.959774	0.329302	0.837902	0.43123	0.732183	0.229449	0.476365	0.260547	0.410587	0.463637	0.853626	0.366065	0.128827	0.293701	0.382917	0.274833	0.715847	0.244001	0.388466	0.108097	0.271621	1.48147e-07	0.326212	0.579327	0.764602	0.349248	0.434761	0.877646	0.451414	0.244982	0.295178	0.416077	0.470139	0.221975	0.278698	0.050908	0.78814	0.333365	0.0023502
BRD-K83896451	glutamine	45	0.279227	0.238926	0.537562	0.608262	0.664596	0.606434	0.356705	0.855204	0.79391	0.0688687	0.78317	0.495783	0.298066	0.496525	0.365358	0.510507	0.403285	0.384022	0.741109	0.411399	0.400287	0.435458	0.561567	0.492522	0.460938	0.344249	0.161582	0.0231607	0.427926	0.000244317	0.387849	0.446814	0.412955	0.429171	0.599942	0.455487	0.459571	0.132248	0.323152	0.452613	0.394514	0.621599	0.346083	0.144429	0.729509	0.167093	0.0576593
BRD-K36760124	lanatoside-c	45	0.280298	0.754686	0.709076	0.721344	0.648816	0.542341	0.613469	0.980452	0.94367	0.369469	0.838044	0.491208	0.72197	0.303928	0.483634	0.248947	0.409675	0.430005	0.884503	0.371839	0.161837	0.281549	0.355577	0.310153	0.730383	0.248075	0.394138	0.20261	0.269482	1.17777e-07	0.338691	0.638344	0.750754	0.349397	0.445218	0.962893	0.431254	0.262864	0.298078	0.438004	0.476214	0.211007	0.259971	0.0150692	0.795087	0.285934	0.0188157
BRD-K19107160	tylosin	45	0.314329	0.378501	0.459422	0.445389	0.389087	0.388204	0.299106	0.909717	0.753245	0.253853	0.528148	0.325521	0.353817	0.422145	0.335904	0.423249	0.403729	0.43118	0.452113	0.379927	0.326044	0.393252	0.438518	0.408983	0.387234	0.381874	0.412416	0.32774	0.290999	4.78244e-06	0.356792	0.320524	0.450996	0.447212	0.441085	0.56757	0.431448	0.230292	0.375503	0.462328	0.412759	0.231144	0.449821	0.170714	0.351671	0.508585	0.151385
BRD-A71765365	mepireserpate	45	0.317987	0.607042	0.662253	0.501217	0.499149	0.492187	0.510097	0.879004	0.859048	0.343485	0.727492	0.370493	0.634574	0.601156	0.57079	0.492184	0.408604	0.397134	0.632213	0.386931	0.282559	0.391169	0.47981	0.262991	0.356776	0.404452	0.374934	0.168799	0.336081	0.0096296	0.381277	0.457845	0.410381	0.363824	0.444523	0.809856	0.414281	0.371759	0.442504	0.45219	0.373677	0.259103	0.338215	0.13311	0.647373	0.309396	0.124885
BRD-A65051990	acenocoumarol	45	0.318565	0.415742	0.42703	0.379879	0.345518	0.379185	0.335571	0.893027	0.828771	0.263307	0.681547	0.324512	0.400607	0.4102	0.328395	0.453986	0.411296	0.418472	0.493	0.36797	0.334899	0.391661	0.452214	0.384218	0.388491	0.353618	0.394778	0.371456	0.258307	1.82789e-06	0.397062	0.33686	0.437514	0.411596	0.400468	0.660654	0.415969	0.264488	0.356786	0.456469	0.416601	0.167121	0.425905	0.150128	0.465031	0.504893	0.388275
BRD-K29731656	corticosterone	45	0.319708	0.376471	0.457825	0.419187	0.361254	0.392125	0.31268	0.932393	0.737741	0.314258	0.666182	0.338941	0.410149	0.410827	0.34539	0.423404	0.408669	0.419035	0.617394	0.374242	0.394151	0.396819	0.47143	0.384029	0.40606	0.348769	0.406126	0.310396	0.305482	5.26913e-05	0.372287	0.323105	0.446486	0.433096	0.434775	0.675822	0.441309	0.273956	0.375998	0.452152	0.411945	0.197627	0.444997	0.117654	0.410698	0.534329	0.253274
BRD-K53342282	cortisol	45	0.320722	0.396039	0.485215	0.403699	0.345839	0.455055	0.394702	0.940816	0.758648	0.246468	0.696082	0.324909	0.438166	0.517802	0.443671	0.449444	0.419378	0.377267	0.701036	0.368299	0.375622	0.429766	0.46908	0.327923	0.410658	0.366585	0.413678	0.230542	0.330428	3.79052e-06	0.4223	0.369508	0.44841	0.389796	0.395819	0.767475	0.427682	0.296207	0.378367	0.45245	0.423013	0.224336	0.41306	0.0789198	0.620539	0.488616	0.204414
BRD-K61401890	deguelin	45	0.326177	0.567739	0.545188	0.569638	0.454297	0.517912	0.457032	0.898876	0.899208	0.381979	0.696399	0.36431	0.578081	0.534636	0.439578	0.513118	0.410199	0.397612	0.634698	0.387809	0.416462	0.427523	0.454133	0.383583	0.374259	0.377044	0.378866	0.217647	0.413839	0.0146441	0.406604	0.467525	0.384524	0.389853	0.459551	0.745888	0.463643	0.323633	0.380431	0.454452	0.415132	0.368683	0.442637	0.101382	0.647844	0.292619	0.138068
BRD-A64479082	quinidine	45	0.330818	0.418401	0.517508	0.498972	0.50059	0.449347	0.42617	0.888097	0.732067	0.336891	0.697748	0.435345	0.600703	0.483461	0.35038	0.444222	0.40094	0.443027	0.542996	0.408219	0.367599	0.419077	0.453024	0.319004	0.391436	0.416505	0.415141	0.241826	0.341653	0.0367511	0.363433	0.414287	0.448769	0.473103	0.458048	0.746001	0.452059	0.380638	0.355118	0.4264	0.463201	0.283422	0.377149	0.252049	0.540387	0.514086	0.245323
BRD-A18917088	estradiol	45	0.331819	0.528113	0.562597	0.497464	0.527134	0.50246	0.483084	0.911638	0.817242	0.395568	0.768265	0.350507	0.520556	0.511658	0.496261	0.487353	0.409259	0.414824	0.551416	0.381465	0.392199	0.406107	0.453229	0.396796	0.387085	0.403906	0.399336	0.230831	0.382214	0.0144079	0.391396	0.485258	0.421707	0.427469	0.416926	0.710858	0.475127	0.390252	0.426007	0.437254	0.405406	0.291927	0.367808	0.124353	0.591015	0.382088	0.163637
BRD-K41494493	bisphenol-a	46	0.288576	0.414036	0.286979	0.52982	0.299751	0.387233	0.289164	0.806781	0.937965	0.556075	0.807231	0.313452	0.300698	0.42767	0.110839	0.3528	0.381575	0.436899	0.589227	0.480045	0.13302	0.4004	0.406523	0.409037	0.305452	0.355693	0.374371	0.0975025	0.35546	0.000130742	0.387884	0.214433	0.470584	0.34434	0.540048	0.503093	0.744573	0.499678	0.232986	0.459704	0.442066	0.346792	0.351863	0.0850436	0.599305	0.266624	8.96094e-05
BRD-K62959606	sphingosine	46	0.308663	0.538685	0.606344	0.614736	0.601039	0.585249	0.474561	0.853743	0.839047	0.489375	0.6538	0.485419	0.609547	0.600253	0.504459	0.569111	0.402789	0.418363	0.667268	0.47862	0.307896	0.50609	0.483183	0.306893	0.404509	0.420369	0.367685	0.178349	0.408869	0.00262797	0.479806	0.495707	0.409849	0.429932	0.567681	0.713304	0.479119	0.31409	0.406039	0.522061	0.529962	0.461531	0.501965	0.306379	0.568507	0.217195	0.0417195
BRD-K08327065	kanamycin	46	0.321836	0.404818	0.419481	0.427677	0.379426	0.422468	0.287256	0.902433	0.927794	0.324321	0.786824	0.323404	0.451322	0.477006	0.407435	0.397736	0.41722	0.400783	0.518713	0.375436	0.351032	0.379241	0.467089	0.398259	0.396687	0.363189	0.389483	0.155874	0.258705	3.90119e-06	0.35355	0.383544	0.438065	0.444532	0.416703	0.612427	0.420822	0.335253	0.364436	0.449537	0.432515	0.118681	0.412351	0.14008	0.539114	0.494398	0.367432
BRD-A14240607	octopamine	46	0.322845	0.41864	0.491802	0.482998	0.39157	0.450687	0.377338	0.838596	0.725805	0.242898	0.657515	0.404716	0.447903	0.478321	0.364946	0.493409	0.388952	0.481205	0.55405	0.441807	0.370138	0.458589	0.420047	0.312218	0.316035	0.407342	0.428605	0.266482	0.391444	1.49258e-07	0.380679	0.344549	0.443789	0.379992	0.462379	0.671097	0.427286	0.40012	0.328982	0.43306	0.487299	0.248318	0.404502	0.14995	0.449089	0.555494	0.472516
BRD-K11439261	dydrogesterone	46	0.322864	0.353362	0.454654	0.399709	0.343033	0.378953	0.328449	0.866303	0.68542	0.299305	0.562334	0.299785	0.437817	0.414103	0.331542	0.4199	0.409524	0.423667	0.535053	0.369064	0.396158	0.391489	0.427004	0.430526	0.370015	0.365651	0.409131	0.408256	0.329989	5.5618e-05	0.381345	0.334163	0.434568	0.407218	0.407889	0.577406	0.428566	0.261584	0.373097	0.456407	0.412201	0.197234	0.425851	0.129424	0.334927	0.558959	0.229572
BRD-K69743918	estrone	46	0.326281	0.410304	0.425454	0.424047	0.274482	0.411209	0.423141	0.903349	0.614527	0.328474	0.415169	0.321719	0.477813	0.398997	0.419294	0.460736	0.418733	0.423002	0.503087	0.36724	0.411751	0.409454	0.436703	0.44332	0.382198	0.374971	0.416382	0.416276	0.400036	1.23342e-06	0.424855	0.418981	0.455294	0.407061	0.39171	0.649742	0.411162	0.32266	0.379994	0.447633	0.412677	0.256705	0.421022	0.154131	0.548151	0.478932	0.341077
BRD-A15914070	4-hydroxy-2-nonenal	46	0.329077	0.546379	0.502602	0.513889	0.509118	0.512816	0.439759	0.886752	0.749938	0.425147	0.587055	0.407486	0.534493	0.482132	0.441971	0.446901	0.410557	0.476404	0.477097	0.439763	0.382429	0.430994	0.440153	0.400907	0.373928	0.473146	0.390691	0.191453	0.364488	0.0207552	0.40792	0.512569	0.436758	0.489567	0.474067	0.78945	0.445733	0.428729	0.399286	0.426538	0.408195	0.208843	0.422176	0.23045	0.44231	0.217956	0.151202
BRD-A86109770	guggulsterone	46	0.330395	0.590556	0.580582	0.503194	0.481822	0.523141	0.481457	0.88192	0.857822	0.394002	0.559308	0.360125	0.548328	0.561113	0.492224	0.512242	0.407077	0.405422	0.499239	0.385356	0.339713	0.40133	0.428555	0.444298	0.329177	0.448127	0.394201	0.440524	0.372481	0.0014186	0.375715	0.4955	0.416886	0.418536	0.43439	0.765689	0.413568	0.365437	0.40612	0.432749	0.417551	0.240165	0.369442	0.168773	0.481695	0.270114	0.111821
BRD-K80348542	cephaeline	47	0.268975	0.407901	0.754965	0.798695	0.730118	0.568964	0.690243	0.923528	0.975609	0.0564389	0.964896	0.395822	0.357986	0.646691	0.702502	0.424728	0.399492	0.525405	0.964265	0.41893	0.176534	0.460301	0.390986	0.270488	0.587402	0.288781	0.488903	0.000745841	0.204342	3.5083e-05	0.548641	0.650646	0.471447	0.254991	0.415724	0.956334	0.53194	0.0909453	0.223209	0.394379	0.458699	0.131415	0.259202	0.024739	0.854275	0.116804	0.0185356
BRD-K12437696	aztreonam	47	0.32308	0.326338	0.437837	0.396764	0.323048	0.382869	0.300192	0.88789	0.763426	0.262312	0.817483	0.321546	0.329075	0.436052	0.303468	0.377379	0.401611	0.420192	0.393157	0.355373	0.380465	0.369094	0.446172	0.47558	0.337474	0.354847	0.388315	0.274094	0.289039	6.84274e-06	0.368485	0.376365	0.444954	0.446173	0.400921	0.58865	0.393817	0.313171	0.366692	0.46849	0.409701	0.180969	0.390746	0.107147	0.517553	0.500276	0.378241
BRD-A62809825	thapsigargin	47	0.331312	0.531451	0.707317	0.584974	0.499525	0.51181	0.546018	0.886456	0.856492	0.446625	0.76215	0.49255	0.501264	0.587875	0.543761	0.481986	0.423551	0.497229	0.616177	0.497414	0.352351	0.449954	0.440491	0.281498	0.456906	0.382391	0.420972	0.0897537	0.424587	0.000405901	0.389778	0.46567	0.417131	0.428289	0.501546	0.699146	0.547856	0.389099	0.373928	0.516073	0.462622	0.402561	0.456544	0.334892	0.708674	0.273724	0.142852
BRD-K35573744	erbstatin-analog	47	0.337122	0.481515	0.449115	0.514012	0.448391	0.479931	0.396028	0.916766	0.750175	0.4077	0.644915	0.388962	0.553553	0.543979	0.364248	0.42372	0.412872	0.407161	0.461857	0.39084	0.360221	0.415194	0.487327	0.352994	0.376411	0.434088	0.406725	0.263627	0.353066	0.0814652	0.357203	0.445098	0.436295	0.496626	0.473547	0.768279	0.47076	0.354462	0.382347	0.432797	0.423687	0.247728	0.4103	0.319305	0.456682	0.472801	0.0656132
BRD-K06753942	nobiletin	47	0.340165	0.52146	0.584185	0.522371	0.507331	0.467725	0.452488	0.908799	0.831073	0.352914	0.720609	0.382781	0.469952	0.522752	0.499838	0.54112	0.409807	0.417022	0.624405	0.402399	0.403003	0.431221	0.466913	0.361039	0.380305	0.397603	0.401914	0.279869	0.392017	0.00213102	0.396163	0.473707	0.437229	0.412726	0.438129	0.795425	0.466251	0.352736	0.398173	0.458451	0.441942	0.315659	0.407127	0.191175	0.602605	0.374842	0.256403
BRD-K82261406	anisomycin	48	0.2627	0.505607	0.724935	0.65838	0.463414	0.601694	0.718008	0.937956	0.931787	0.0562748	0.958023	0.431475	0.680789	0.506607	0.528626	0.421489	0.378629	0.501031	0.928912	0.468047	0.240102	0.31922	0.373865	0.147607	0.521157	0.30828	0.461872	0.00664444	0.274118	3.66555e-09	0.280262	0.617997	0.493899	0.366832	0.487437	0.970241	0.44566	0.114952	0.184639	0.349254	0.583345	0.0873155	0.153356	0.0312904	0.898578	0.310793	0.0628668
BRD-K94436377	diosmin	48	0.320363	0.351305	0.468258	0.366093	0.330774	0.375438	0.291307	0.887088	0.778883	0.27234	0.571215	0.299174	0.338205	0.431247	0.305633	0.431656	0.406121	0.426418	0.517197	0.362738	0.342857	0.390999	0.409361	0.451954	0.372267	0.356112	0.404496	0.417955	0.328939	4.36407e-06	0.364093	0.328966	0.448896	0.42089	0.396876	0.528636	0.409515	0.226645	0.37122	0.45274	0.401327	0.252405	0.419504	0.214893	0.325279	0.494263	0.294346
BRD-K45770447	artemisinin	48	0.32653	0.407511	0.475646	0.481784	0.36984	0.41774	0.337501	0.863233	0.848281	0.391308	0.553825	0.380788	0.365524	0.48768	0.334337	0.489932	0.406015	0.396341	0.491658	0.38948	0.391471	0.421328	0.459665	0.411503	0.396101	0.381643	0.413381	0.260835	0.299795	4.47622e-06	0.409754	0.370755	0.423028	0.437195	0.461314	0.52998	0.436401	0.267465	0.37791	0.487588	0.429482	0.285565	0.451126	0.217552	0.427879	0.469774	0.159934
BRD-K61480498	epoxycholesterol	48	0.327134	0.373207	0.490696	0.518789	0.551688	0.503203	0.358831	0.815138	0.743137	0.342551	0.601155	0.467484	0.485217	0.406107	0.402398	0.521432	0.395682	0.533639	0.619873	0.475356	0.374997	0.518187	0.438229	0.376455	0.33988	0.405608	0.435153	0.175387	0.389735	0.0245711	0.482433	0.377978	0.409717	0.372247	0.453453	0.601643	0.533743	0.395345	0.328961	0.430225	0.470335	0.447367	0.493503	0.345878	0.478556	0.373967	0.188144
BRD-A28746609	paclitaxel	48	0.329907	0.562231	0.55488	0.518221	0.386964	0.523552	0.448503	0.914376	0.877158	0.452442	0.813059	0.365546	0.556459	0.565705	0.493982	0.491454	0.408242	0.39228	0.586815	0.381226	0.421854	0.380845	0.494546	0.360992	0.367988	0.415288	0.388146	0.238819	0.368288	0.0010896	0.343641	0.490338	0.41295	0.397719	0.440664	0.747859	0.472699	0.410499	0.397711	0.427375	0.416738	0.288177	0.332109	0.109049	0.722312	0.35407	0.185403
BRD-K26241953	piceatannol	48	0.332155	0.564543	0.609106	0.549636	0.567429	0.554523	0.495623	0.928089	0.825329	0.40446	0.716289	0.388136	0.573316	0.563441	0.494825	0.506123	0.410232	0.423576	0.583701	0.399578	0.373882	0.426522	0.438033	0.34775	0.36269	0.437953	0.401588	0.212905	0.388154	0.0037028	0.387813	0.518194	0.40045	0.454736	0.492497	0.826951	0.454941	0.391705	0.418503	0.431223	0.405914	0.187495	0.379508	0.199111	0.58314	0.26463	0.198791
BRD-K99257182	quinidine	48	0.334566	0.470545	0.417453	0.414931	0.42757	0.408544	0.352299	0.84305	0.904432	0.372982	0.776724	0.336231	0.468913	0.598761	0.390241	0.46114	0.408584	0.412307	0.579777	0.372354	0.381304	0.397086	0.46079	0.415818	0.411469	0.392827	0.418458	0.21007	0.367514	2.08272e-06	0.403299	0.427512	0.459365	0.461701	0.433481	0.672405	0.454392	0.347744	0.372708	0.445414	0.461268	0.127781	0.413111	0.196967	0.501442	0.468547	0.207304
BRD-A48720949	testosterone	48	0.337022	0.516658	0.525954	0.447407	0.440612	0.451795	0.451449	0.867093	0.829193	0.388492	0.687293	0.365297	0.524595	0.495678	0.451519	0.50868	0.408066	0.414563	0.532579	0.39677	0.394571	0.42009	0.413475	0.481188	0.367419	0.401802	0.379858	0.360303	0.374863	0.0369963	0.408646	0.453761	0.414762	0.409229	0.383762	0.698946	0.460751	0.399964	0.40393	0.443315	0.404194	0.340871	0.358794	0.0956522	0.587017	0.424543	0.270159
BRD-K52075040	cerulenin	49	0.313612	0.569651	0.53347	0.542269	0.449664	0.520514	0.473738	0.790606	0.802415	0.248044	0.655289	0.442329	0.498665	0.536525	0.399984	0.506891	0.392384	0.495791	0.546006	0.447713	0.332311	0.448787	0.427096	0.239538	0.308569	0.463687	0.414242	0.232724	0.365569	2.46618e-07	0.324173	0.396709	0.431707	0.421818	0.479539	0.648402	0.44761	0.441014	0.348456	0.38073	0.541687	0.212577	0.374343	0.104594	0.499614	0.434535	0.248048
BRD-A20862232	isosalsoline	49	0.314982	0.47019	0.513703	0.472944	0.383166	0.459763	0.410493	0.792995	0.697107	0.24153	0.698093	0.431487	0.521587	0.449542	0.391309	0.488805	0.38004	0.511473	0.530538	0.463752	0.313503	0.475656	0.38679	0.229799	0.271916	0.423996	0.439727	0.217169	0.380896	2.87787e-09	0.347069	0.346362	0.445353	0.367541	0.452458	0.598548	0.422248	0.402679	0.312376	0.411849	0.534683	0.162954	0.398977	0.0671546	0.445723	0.512203	0.432212
BRD-K57943804	equilin	49	0.315396	0.369791	0.478801	0.4349	0.355667	0.464439	0.408068	0.88428	0.893097	0.236007	0.527361	0.374615	0.503605	0.549327	0.398387	0.420727	0.414091	0.420535	0.557746	0.360478	0.422769	0.42351	0.514667	0.374484	0.38969	0.357191	0.399779	0.218357	0.414313	1.00082e-06	0.401585	0.42402	0.457961	0.439334	0.408703	0.758652	0.416907	0.318569	0.378394	0.455288	0.440008	0.307132	0.438037	0.19908	0.633659	0.419331	0.240543
BRD-K91511962	desoxycortone	49	0.319553	0.45505	0.541984	0.421687	0.368275	0.444967	0.458253	0.884119	0.839337	0.295779	0.577592	0.328513	0.582187	0.525446	0.398496	0.531667	0.418852	0.390803	0.607002	0.376757	0.378559	0.430963	0.536243	0.311383	0.373254	0.362889	0.401748	0.358505	0.365237	1.16942e-06	0.39903	0.406536	0.448326	0.403733	0.420325	0.773833	0.435377	0.325083	0.396337	0.439751	0.431704	0.321024	0.398147	0.0958203	0.604778	0.516856	0.25181
BRD-K39330046	hyoscyamine	49	0.322139	0.395419	0.376671	0.400323	0.350349	0.413534	0.29436	0.82341	0.890285	0.303511	0.745223	0.306423	0.420766	0.519202	0.314967	0.401746	0.409542	0.408207	0.603847	0.358965	0.315968	0.38068	0.4328	0.391078	0.346077	0.346758	0.380897	0.191638	0.312717	6.41463e-06	0.379041	0.363096	0.456911	0.441872	0.427706	0.580388	0.440727	0.322849	0.385573	0.448286	0.411301	0.168587	0.403927	0.148355	0.522949	0.542778	0.291091
BRD-K34888156	theobromine	49	0.322433	0.415602	0.529466	0.442216	0.375977	0.435329	0.391159	0.928141	0.840121	0.231181	0.711127	0.31333	0.593119	0.522984	0.409592	0.506233	0.419476	0.382482	0.622253	0.374704	0.392248	0.430362	0.461587	0.380069	0.416372	0.355961	0.419831	0.372074	0.372265	7.27979e-07	0.423624	0.437416	0.434491	0.418536	0.409272	0.704066	0.409394	0.26909	0.376089	0.448252	0.414645	0.195293	0.422245	0.184037	0.646205	0.466577	0.164887
BRD-K70515009	estropipate	49	0.322584	0.380143	0.378503	0.403412	0.342954	0.387187	0.321394	0.911942	0.777396	0.24285	0.669623	0.314451	0.414675	0.458697	0.318867	0.415705	0.407806	0.411381	0.356864	0.374997	0.364854	0.393904	0.459722	0.416725	0.367036	0.363938	0.417827	0.289215	0.323697	3.63154e-06	0.367538	0.331192	0.44815	0.428179	0.408229	0.580019	0.42512	0.286149	0.368835	0.453271	0.40656	0.194125	0.42103	0.208361	0.450422	0.545258	0.179391
BRD-K59946044	atractyloside	49	0.32696	0.374806	0.40712	0.409434	0.30095	0.382597	0.29098	0.896203	0.797472	0.271595	0.564585	0.297431	0.391517	0.490961	0.323268	0.37942	0.404895	0.414372	0.476282	0.371313	0.379653	0.389934	0.4194	0.464252	0.355855	0.378315	0.413397	0.298682	0.310264	7.45633e-06	0.365756	0.376588	0.456045	0.442748	0.414566	0.461742	0.412455	0.291553	0.362758	0.456232	0.406601	0.255843	0.428381	0.185727	0.36381	0.499722	0.0998046
BRD-K60507178	podophyllotoxin	49	0.327521	0.485799	0.408788	0.446048	0.270944	0.428737	0.275487	0.938129	0.863464	0.456035	0.718737	0.32411	0.528027	0.447965	0.332267	0.364437	0.407733	0.411804	0.587678	0.381178	0.354801	0.369745	0.490341	0.402787	0.405335	0.376141	0.414742	0.231462	0.323803	5.0404e-06	0.367404	0.356971	0.439272	0.403068	0.41478	0.69383	0.453392	0.317695	0.36073	0.434783	0.415555	0.215929	0.314158	0.183952	0.530641	0.376144	0.331027
BRD-K51033547	tramadol	49	0.33606	0.449034	0.495874	0.405398	0.420695	0.440922	0.384903	0.856999	0.799746	0.384356	0.608373	0.326048	0.520372	0.44573	0.441143	0.484066	0.404828	0.393662	0.542765	0.365481	0.418648	0.400894	0.401034	0.44109	0.34916	0.390142	0.362486	0.511963	0.354684	0.00155261	0.379993	0.431995	0.416046	0.398671	0.377188	0.649684	0.441615	0.336028	0.388307	0.439479	0.400743	0.240041	0.399721	0.0752924	0.531199	0.402934	0.820766
BRD-K21733600	rofecoxib	49	0.338975	0.468411	0.522521	0.429034	0.408056	0.432898	0.420053	0.866582	0.832382	0.284039	0.705907	0.342076	0.327288	0.502283	0.453519	0.506924	0.404401	0.421756	0.556126	0.374314	0.434356	0.38693	0.432025	0.415383	0.362303	0.399666	0.391611	0.305341	0.398033	0.00115592	0.359689	0.435314	0.431565	0.410944	0.387188	0.596517	0.456367	0.321664	0.378158	0.445067	0.410358	0.25109	0.418401	0.106899	0.547889	0.450876	0.283838
BRD-K76674262	homoharringtonine	50	0.247977	0.504502	0.856909	0.881323	0.836168	0.595553	0.745216	0.938572	0.980355	0.0334808	0.920979	0.515152	0.399894	0.649956	0.711344	0.449406	0.395269	0.677006	0.986229	0.47737	0.138347	0.44816	0.352231	0.204358	0.794245	0.307204	0.53372	0.000189191	0.191315	6.11909e-06	0.525281	0.744348	0.635043	0.285986	0.422292	0.96755	0.573544	0.148037	0.187788	0.37964	0.4438	0.0836851	0.297046	0.0132111	0.879102	0.0893846	0.000189752
BRD-K48519456	penicillin	50	0.319803	0.322655	0.428063	0.418733	0.30522	0.427093	0.365679	0.923399	0.803125	0.330654	0.531898	0.336199	0.456451	0.501216	0.362596	0.476539	0.416848	0.417906	0.497086	0.377378	0.420596	0.406421	0.44104	0.356137	0.373394	0.383675	0.413484	0.307157	0.382129	3.10069e-07	0.410459	0.393114	0.448049	0.400863	0.401776	0.680792	0.428415	0.253293	0.373488	0.439904	0.406282	0.22732	0.415601	0.563778	0.546462	0.480226	0.193754
BRD-K49481516	galantamine	50	0.334181	0.462665	0.484901	0.461349	0.408181	0.451646	0.429435	0.851053	0.843	0.319706	0.620891	0.396361	0.414865	0.52601	0.492334	0.563084	0.408751	0.403567	0.625618	0.377969	0.394191	0.407136	0.465616	0.389941	0.406698	0.38986	0.398359	0.400666	0.329236	0.000333839	0.395184	0.433498	0.453343	0.43623	0.402997	0.67301	0.451344	0.367764	0.383018	0.47636	0.435863	0.345147	0.457473	0.170361	0.515589	0.452128	0.23329
BRD-A79058669	BRD-A79058669	51	0.310954	0.43022	0.49849	0.476799	0.386503	0.450552	0.354618	0.813382	0.675147	0.200572	0.667323	0.422977	0.462478	0.452253	0.357603	0.456858	0.378446	0.482178	0.602922	0.456216	0.324469	0.456527	0.380999	0.2402	0.261104	0.423097	0.433818	0.232682	0.393352	4.94797e-09	0.34368	0.337824	0.429988	0.363289	0.446472	0.656036	0.423487	0.396626	0.30788	0.416829	0.528682	0.153464	0.399557	0.140177	0.383882	0.550124	0.377192
BRD-K68804560	benzatropine	51	0.322226	0.412207	0.429127	0.387075	0.330214	0.423978	0.370817	0.940721	0.888201	0.340118	0.657481	0.331439	0.495251	0.567388	0.3872	0.45793	0.416168	0.393732	0.529085	0.36613	0.39376	0.4101	0.488267	0.401777	0.417018	0.372738	0.397557	0.455575	0.39854	5.53428e-06	0.409578	0.403134	0.443028	0.435995	0.39178	0.679719	0.425518	0.330837	0.365155	0.434874	0.416049	0.240172	0.421177	0.254613	0.602019	0.508911	0.193059
BRD-A39903068	sisomicin	51	0.324984	0.401037	0.415727	0.389045	0.363775	0.399429	0.311261	0.933907	0.761569	0.265696	0.639094	0.329303	0.46356	0.448261	0.320696	0.451562	0.405906	0.426765	0.549116	0.375931	0.382292	0.395347	0.448363	0.420139	0.372774	0.366003	0.397846	0.362589	0.310831	8.27186e-07	0.383215	0.353627	0.455961	0.425219	0.413436	0.648499	0.423733	0.274954	0.362736	0.468713	0.412587	0.26093	0.44649	0.210102	0.407492	0.552559	0.328057
BRD-A75140635	salsolidine	51	0.3264	0.344099	0.381305	0.379088	0.302282	0.371088	0.289765	0.86565	0.730014	0.320118	0.708468	0.285485	0.323305	0.39701	0.288976	0.4393	0.400412	0.416877	0.422274	0.363445	0.384898	0.385351	0.395596	0.452431	0.351325	0.371915	0.410106	0.341387	0.329294	2.16582e-06	0.360094	0.328627	0.442619	0.426921	0.410119	0.545029	0.402932	0.250929	0.373806	0.465837	0.411654	0.320135	0.449427	0.241829	0.384457	0.543127	0.197186
BRD-K32793530	estriol	51	0.329383	0.310217	0.422886	0.418752	0.345665	0.413537	0.400311	0.909136	0.726983	0.254087	0.422323	0.30926	0.424864	0.486689	0.382715	0.398923	0.417432	0.425669	0.448747	0.376171	0.413622	0.414959	0.448165	0.466687	0.397791	0.35714	0.415685	0.41277	0.347882	1.43317e-06	0.393445	0.38061	0.451719	0.400657	0.392036	0.662485	0.401405	0.344695	0.371851	0.438833	0.398738	0.283554	0.426479	0.21236	0.44926	0.549233	0.305879
BRD-K56033645	methyl-hydantoin	51	0.330106	0.406853	0.41671	0.413446	0.367226	0.4399	0.331086	0.807189	0.840848	0.252351	0.58845	0.330872	0.387086	0.513498	0.365727	0.487363	0.416323	0.425567	0.46863	0.372443	0.408099	0.431053	0.468542	0.379477	0.376642	0.377854	0.417286	0.425171	0.396173	3.13486e-06	0.416874	0.379527	0.444902	0.428782	0.409545	0.709192	0.429845	0.329914	0.366953	0.456855	0.428633	0.255729	0.424009	0.313594	0.501619	0.465714	0.342154
BRD-K88378636	withaferin-a	52	0.246468	0.617251	0.690068	0.736882	0.713984	0.650091	0.622407	0.79155	0.80215	0.424744	0.640747	0.561484	0.477293	0.610956	0.470282	0.557865	0.396138	0.498432	0.634114	0.566355	0.073336	0.418695	0.266341	0.273812	0.592621	0.573752	0.352783	0.0476564	0.229441	0.00128555	0.311131	0.536237	0.496069	0.573913	0.710934	0.757645	0.194915	0.274775	0.428433	0.479727	0.471861	0.170181	0.311941	0.0840392	0.502868	0.168405	0.00521415
BRD-K35307346	hydroxycholesterol	52	0.309944	0.246582	0.52654	0.440326	0.397568	0.448546	0.335395	0.732269	0.793804	0.25874	0.718758	0.43594	0.485854	0.331354	0.291435	0.38545	0.385527	0.532118	0.48046	0.463038	0.382636	0.449734	0.395121	0.363504	0.261842	0.348499	0.447727	0.0465464	0.439105	2.0911e-08	0.381853	0.300079	0.427404	0.34934	0.422356	0.565064	0.458719	0.309034	0.267191	0.406859	0.451065	0.547065	0.414662	0.164252	0.497385	0.468081	0.42302
BRD-A10396145	vanillyl-glycol	52	0.311456	0.448204	0.514396	0.505046	0.376283	0.448153	0.374258	0.795765	0.761281	0.21077	0.696321	0.459266	0.470081	0.492162	0.357897	0.512134	0.379381	0.505666	0.578993	0.466821	0.313044	0.466324	0.388192	0.248959	0.273006	0.425704	0.436327	0.250085	0.359356	7.51309e-10	0.360835	0.325013	0.4393	0.362229	0.461948	0.638813	0.414264	0.423237	0.318483	0.426591	0.538802	0.217001	0.396811	0.140652	0.466375	0.502196	0.463914
BRD-K42823101	BRD-K42823101	52	0.318542	0.482721	0.538251	0.525125	0.423302	0.469953	0.381492	0.835912	0.700147	0.239765	0.746605	0.436377	0.509165	0.51299	0.371726	0.489883	0.380534	0.512069	0.595309	0.469443	0.363666	0.466534	0.417081	0.206465	0.283885	0.418114	0.432338	0.276686	0.399088	2.00416e-09	0.366241	0.365053	0.442337	0.378492	0.46783	0.700927	0.441641	0.423689	0.325647	0.416246	0.557798	0.186318	0.403355	0.122935	0.542017	0.49991	0.400177
BRD-A48323445	salsoline	52	0.318842	0.47511	0.553617	0.535404	0.427607	0.476962	0.412252	0.79666	0.770467	0.208857	0.765782	0.481212	0.447773	0.494839	0.40966	0.521696	0.381524	0.513122	0.686334	0.490059	0.339496	0.490422	0.39389	0.216852	0.296953	0.430623	0.437839	0.306207	0.396464	1.04303e-09	0.36424	0.368606	0.433392	0.400003	0.48695	0.687114	0.448409	0.402682	0.331053	0.423066	0.574979	0.183622	0.413677	0.163722	0.486875	0.490628	0.377956
BRD-A06779035	BRD-A06779035	52	0.32514	0.45828	0.553472	0.541832	0.430982	0.492821	0.408343	0.854979	0.823504	0.225447	0.736184	0.48415	0.610199	0.499951	0.382955	0.53296	0.384863	0.508681	0.674349	0.482399	0.366217	0.479259	0.420182	0.193775	0.340315	0.419143	0.435538	0.258083	0.386913	1.75573e-08	0.360144	0.380476	0.432124	0.390925	0.489685	0.724898	0.451792	0.464828	0.315551	0.419728	0.564931	0.249092	0.406306	0.0983395	0.567705	0.462607	0.440016
BRD-A00150179	5-hydroxytryptophan	53	0.315972	0.445366	0.543297	0.542844	0.468393	0.465248	0.392928	0.806503	0.82076	0.204634	0.725707	0.455696	0.369461	0.48098	0.416259	0.519258	0.376603	0.535454	0.604526	0.471849	0.345852	0.479758	0.433232	0.259775	0.290736	0.428126	0.436207	0.226863	0.371388	6.31196e-10	0.362347	0.360052	0.442833	0.368583	0.500663	0.65827	0.425225	0.415485	0.329548	0.431245	0.528956	0.188777	0.418332	0.075008	0.464191	0.517094	0.557932
BRD-A52650764	ingenol	53	0.316408	0.600118	0.802375	0.730942	0.593542	0.520949	0.639549	0.911954	0.945761	0.354379	0.831755	0.631585	0.587062	0.745718	0.592624	0.55109	0.422456	0.456319	0.773855	0.460213	0.346659	0.390581	0.437889	0.25111	0.632664	0.397987	0.422584	0.030472	0.4345	0.00683074	0.344094	0.596721	0.408978	0.457127	0.614306	0.876342	0.521531	0.302571	0.353307	0.463485	0.534085	0.310637	0.414832	0.17852	0.829916	0.189047	0.0381515
BRD-K13195996	BRD-K13195996	53	0.318928	0.407817	0.517623	0.477756	0.399503	0.476385	0.35783	0.810765	0.675274	0.201094	0.670499	0.446761	0.433529	0.477001	0.367516	0.497334	0.379259	0.525159	0.524582	0.488516	0.338473	0.474375	0.373768	0.262362	0.292513	0.430382	0.439127	0.315334	0.391377	1.34785e-09	0.359752	0.353071	0.441942	0.377247	0.441554	0.656577	0.429869	0.461973	0.309075	0.413545	0.541602	0.208312	0.39719	0.11975	0.452737	0.524949	0.445721
BRD-A57226833	farnesylpyrophosphate	53	0.319908	0.41151	0.514463	0.522888	0.368398	0.455875	0.402572	0.754187	0.66436	0.233053	0.655816	0.436677	0.422321	0.458028	0.36134	0.469847	0.380743	0.538797	0.538279	0.468967	0.346143	0.467494	0.379242	0.252965	0.279703	0.429426	0.443508	0.301959	0.381138	4.70699e-09	0.354996	0.342914	0.435308	0.379836	0.467159	0.623683	0.413163	0.415006	0.326123	0.412176	0.522533	0.204787	0.416918	0.179519	0.435881	0.513034	0.374929
BRD-K69122748	diacerein	53	0.327449	0.405727	0.451756	0.430277	0.343953	0.438833	0.368126	0.949578	0.81073	0.270346	0.746566	0.329	0.475608	0.471629	0.412319	0.508994	0.424335	0.412303	0.631381	0.383427	0.409669	0.428381	0.509701	0.301853	0.438562	0.364353	0.419898	0.324796	0.397513	1.04342e-05	0.436537	0.411242	0.455368	0.438149	0.410834	0.820494	0.442356	0.280254	0.368048	0.446122	0.411821	0.222594	0.434623	0.154137	0.574922	0.398582	0.213682
BRD-K29627430	clavulanic-acid	53	0.331687	0.394459	0.446056	0.464163	0.342234	0.449317	0.409737	0.94578	0.775857	0.295832	0.713232	0.413082	0.457544	0.480765	0.388805	0.482454	0.416642	0.413565	0.537938	0.370817	0.417881	0.415105	0.47205	0.404089	0.402123	0.36276	0.413429	0.540451	0.401333	1.67171e-06	0.412896	0.387649	0.454277	0.430233	0.422872	0.687779	0.428836	0.293243	0.367532	0.451102	0.41029	0.297211	0.409403	0.270811	0.60367	0.436372	0.296516
BRD-K79134921	methyltyramine	54	0.316669	0.418148	0.494612	0.536394	0.378666	0.459432	0.380053	0.755042	0.711714	0.185281	0.615939	0.443626	0.381036	0.464383	0.360053	0.493724	0.379215	0.530076	0.679051	0.475765	0.327519	0.467159	0.377187	0.260655	0.271698	0.431128	0.440375	0.218899	0.410739	3.78662e-09	0.356084	0.348982	0.430212	0.36772	0.466941	0.590294	0.427359	0.419471	0.318456	0.417462	0.5295	0.166201	0.418979	0.11566	0.371533	0.536495	0.377581
BRD-K39981244	norepinephrine	54	0.31668	0.452449	0.516705	0.496529	0.372172	0.449684	0.402398	0.751252	0.705648	0.204282	0.732485	0.423494	0.46809	0.505084	0.346289	0.483796	0.377513	0.503373	0.59158	0.450592	0.349234	0.460534	0.377731	0.232281	0.252652	0.439808	0.446192	0.275798	0.391627	2.72394e-09	0.342533	0.344447	0.44206	0.376619	0.446234	0.683167	0.42677	0.430825	0.318744	0.416342	0.534512	0.174552	0.399318	0.0769526	0.450037	0.615471	0.387656
BRD-A26347577	BRD-A26347577	54	0.318256	0.453056	0.506026	0.500934	0.398961	0.457297	0.406037	0.817584	0.726808	0.200164	0.676986	0.456726	0.416849	0.471842	0.358339	0.476595	0.377883	0.516079	0.564664	0.472928	0.341463	0.46476	0.384881	0.264449	0.255771	0.420402	0.428013	0.230793	0.371431	2.03823e-09	0.346318	0.336126	0.440429	0.37098	0.467216	0.669077	0.418763	0.43368	0.310987	0.426518	0.548655	0.138893	0.433407	0.0944288	0.43721	0.557817	0.475784
BRD-K02603382	1-methylisoquinoline	54	0.324343	0.438095	0.517161	0.520841	0.375151	0.487669	0.384373	0.811034	0.772889	0.23502	0.704786	0.464563	0.43548	0.457776	0.388785	0.482168	0.375058	0.51883	0.564469	0.486001	0.356324	0.475441	0.404483	0.257425	0.279341	0.435094	0.440362	0.236333	0.399851	1.6557e-09	0.366236	0.339309	0.435576	0.374151	0.464638	0.608622	0.422345	0.36231	0.32353	0.420712	0.538888	0.206872	0.422893	0.0917009	0.443601	0.504344	0.474132
BRD-K53226837	cycloserine	54	0.324979	0.394638	0.455251	0.380583	0.326968	0.422294	0.345048	0.878879	0.739475	0.249492	0.59641	0.335823	0.3589	0.504514	0.372612	0.447733	0.410606	0.415745	0.479011	0.373426	0.416975	0.398223	0.473726	0.411813	0.379243	0.372208	0.38998	0.353691	0.387385	9.38794e-07	0.405265	0.378487	0.456367	0.419416	0.398698	0.751245	0.408681	0.29011	0.361904	0.462328	0.443674	0.270429	0.43504	0.207103	0.545942	0.477759	0.404882
BRD-K33299843	naproxen	54	0.327443	0.369061	0.425398	0.39486	0.328586	0.400432	0.35488	0.866672	0.899207	0.260661	0.712212	0.329664	0.408009	0.473159	0.323118	0.439071	0.411155	0.405279	0.444927	0.367934	0.35922	0.39355	0.432268	0.425911	0.407074	0.365854	0.401889	0.241069	0.313264	8.09908e-07	0.372375	0.348363	0.433752	0.42046	0.402223	0.512692	0.422229	0.281614	0.369678	0.454146	0.40542	0.194022	0.440945	0.171883	0.469084	0.519402	0.225257
BRD-K13927029	retinol	54	0.331954	0.46013	0.543201	0.557371	0.486961	0.530128	0.394579	0.828208	0.823616	0.371825	0.603181	0.47101	0.578532	0.51043	0.40992	0.513636	0.397733	0.524531	0.619652	0.453944	0.395589	0.455025	0.480705	0.289803	0.341764	0.465307	0.45544	0.258726	0.379899	0.00237653	0.449764	0.423291	0.387309	0.395412	0.507966	0.707439	0.472675	0.409336	0.35462	0.415518	0.452047	0.380101	0.513337	0.35306	0.528086	0.341346	0.207236
BRD-K13664374	dichloroacetic-acid	54	0.33401	0.42801	0.507856	0.396	0.417631	0.444719	0.402113	0.82837	0.772493	0.241059	0.618836	0.33438	0.506234	0.441631	0.453976	0.542998	0.409681	0.402245	0.623922	0.371641	0.387165	0.410927	0.43908	0.452938	0.380834	0.367478	0.388751	0.25187	0.344415	0.00227043	0.39186	0.403661	0.457614	0.381521	0.370837	0.610418	0.443823	0.303667	0.379985	0.441512	0.388165	0.269592	0.424204	0.138283	0.478296	0.498885	0.385371
BRD-K03842655	penitrem-a	54	0.342593	0.593762	0.590799	0.564536	0.478604	0.528832	0.491942	0.92162	0.880665	0.449152	0.696239	0.389625	0.595882	0.571311	0.448428	0.525961	0.408975	0.399706	0.593081	0.401156	0.402971	0.432869	0.462739	0.381073	0.372977	0.428159	0.392139	0.302919	0.395373	0.0021681	0.396155	0.510305	0.399034	0.454447	0.467223	0.759471	0.472776	0.404715	0.420872	0.475942	0.407589	0.323802	0.427906	0.200047	0.630403	0.363107	0.207588
BRD-K65261396	tacrolimus	54	0.347433	0.450522	0.512531	0.509182	0.435384	0.455357	0.369715	0.85313	0.827707	0.450469	0.665108	0.355392	0.549166	0.593296	0.43981	0.523793	0.407738	0.380659	0.549178	0.397677	0.349175	0.42495	0.450121	0.425946	0.327796	0.433261	0.391698	0.341965	0.415747	0.0117624	0.382369	0.417466	0.412752	0.391287	0.432973	0.687975	0.445878	0.39265	0.384314	0.483795	0.419342	0.616113	0.459911	0.486085	0.513823	0.410983	0.209429
BRD-K74773935	BRD-K74773935	55	0.310591	0.463551	0.544959	0.488111	0.360876	0.446489	0.384286	0.781578	0.713326	0.19755	0.650836	0.430507	0.376851	0.46465	0.374313	0.436092	0.37736	0.511974	0.562774	0.463608	0.310945	0.46791	0.36763	0.241527	0.246787	0.426287	0.435297	0.261021	0.38101	1.73423e-09	0.339368	0.331601	0.446129	0.348938	0.452363	0.602569	0.413666	0.438111	0.306401	0.422657	0.536922	0.150726	0.392358	0.0689313	0.446999	0.607367	0.263215
BRD-K12807006	kaempferol	55	0.316093	0.40859	0.509632	0.489518	0.448456	0.454666	0.353781	0.804296	0.72456	0.205655	0.619461	0.430476	0.440811	0.417269	0.365819	0.492013	0.376096	0.510203	0.571245	0.460922	0.350228	0.465074	0.391585	0.282499	0.238681	0.434741	0.441001	0.166478	0.384559	1.1488e-09	0.355068	0.336394	0.428699	0.369339	0.454311	0.674895	0.41736	0.438319	0.310636	0.417697	0.528962	0.182605	0.409044	0.0870261	0.367674	0.50098	0.463931
BRD-A32582647	BRD-A32582647	55	0.316588	0.428949	0.524649	0.513919	0.363809	0.433568	0.401197	0.802719	0.701531	0.241476	0.672579	0.454801	0.386249	0.482098	0.372972	0.479832	0.374345	0.509377	0.592268	0.458898	0.354948	0.457661	0.415715	0.255302	0.25971	0.432692	0.434023	0.239554	0.372959	1.85434e-09	0.34523	0.331918	0.449266	0.377976	0.451709	0.696616	0.430983	0.449669	0.306001	0.423643	0.533682	0.120044	0.386143	0.0702164	0.477651	0.587016	0.446986
BRD-K65981456	BRD-K65981456	55	0.318944	0.443706	0.512823	0.504373	0.390007	0.463588	0.39513	0.810136	0.65901	0.21171	0.671084	0.45717	0.490983	0.473361	0.374147	0.49084	0.379229	0.514699	0.595734	0.472654	0.337239	0.46701	0.394666	0.266866	0.278874	0.42765	0.440542	0.208331	0.373618	1.07251e-08	0.351925	0.343815	0.443972	0.362807	0.456568	0.594734	0.439244	0.464575	0.317918	0.421516	0.534231	0.185558	0.407589	0.122089	0.457102	0.551658	0.498452
BRD-K19653414	BRD-K19653414	55	0.322714	0.4651	0.498604	0.524792	0.392464	0.462719	0.373177	0.826447	0.7339	0.220683	0.676902	0.444443	0.512463	0.484159	0.367222	0.478908	0.376567	0.514003	0.583851	0.470103	0.33084	0.470367	0.397613	0.299146	0.287127	0.435466	0.432681	0.355223	0.381774	1.59763e-09	0.350884	0.330576	0.45331	0.382491	0.470947	0.67507	0.409267	0.417465	0.320921	0.42722	0.533706	0.19532	0.403249	0.0843585	0.471691	0.528933	0.358918
BRD-K13994703	propranolol	55	0.325387	0.400676	0.454222	0.419104	0.304918	0.408927	0.386832	0.955471	0.750321	0.27486	0.599679	0.329173	0.573866	0.557676	0.341932	0.481368	0.413702	0.410631	0.687363	0.349631	0.406137	0.415523	0.495508	0.397885	0.40918	0.354977	0.417882	0.423886	0.384386	1.23277e-06	0.417798	0.384791	0.440161	0.425954	0.418151	0.686215	0.433196	0.301013	0.38292	0.417191	0.428876	0.255683	0.451956	0.238753	0.576191	0.57721	0.300822
BRD-K09416995	lovastatin	55	0.331293	0.628697	0.600117	0.540644	0.507177	0.543681	0.490489	0.900568	0.796495	0.329936	0.755129	0.454688	0.68155	0.668729	0.473216	0.500887	0.400651	0.383939	0.67493	0.473338	0.289517	0.476117	0.373035	0.304043	0.45146	0.392235	0.367308	0.252769	0.340644	0.00278546	0.305268	0.411421	0.411864	0.430817	0.502525	0.783925	0.472051	0.335239	0.388593	0.411859	0.489061	0.235451	0.394142	0.0725465	0.649897	0.37474	0.255231
BRD-K62997315	urosiol	55	0.332382	0.370343	0.477144	0.422912	0.324214	0.436164	0.335267	0.838259	0.767834	0.329	0.633003	0.32566	0.453144	0.516959	0.327962	0.424776	0.413678	0.430196	0.414768	0.37582	0.409191	0.418965	0.45561	0.422176	0.375528	0.359406	0.409659	0.391124	0.374489	2.46837e-06	0.402761	0.392471	0.419351	0.428282	0.411913	0.546986	0.431584	0.290893	0.361523	0.428218	0.41641	0.210617	0.424404	0.369379	0.5011	0.426936	0.349253
BRD-K04804440	ciprofloxacin	55	0.338735	0.384483	0.415391	0.396633	0.432338	0.388737	0.339808	0.858519	0.79355	0.236712	0.808002	0.358096	0.388516	0.452234	0.327034	0.435902	0.402974	0.42627	0.404223	0.357607	0.394301	0.381118	0.406696	0.439117	0.375608	0.336301	0.392649	0.315649	0.332629	3.26096e-06	0.396249	0.365439	0.460448	0.443519	0.394986	0.591194	0.416452	0.306334	0.374949	0.452686	0.404403	0.345108	0.416497	0.192646	0.58934	0.543899	0.247357
BRD-K18910433	estradiol	56	0.30341	0.565584	0.649336	0.401344	0.594623	0.614186	0.581573	0.852461	0.799098	0.346648	0.72917	0.534507	0.600682	0.553191	0.514782	0.585354	0.413387	0.42023	0.650938	0.514122	0.286354	0.508915	0.542539	0.40363	0.327514	0.537056	0.49569	0.421935	0.265424	0.0149963	0.471198	0.3635	0.313091	0.450602	0.363906	0.742291	0.386579	0.394851	0.516666	0.508282	0.420721	0.317212	0.287496	0.100629	0.675324	0.536096	0.146901
BRD-A08027849	deoxycholic-acid	56	0.324237	0.381123	0.592844	0.470388	0.340998	0.477483	0.42164	0.880068	0.686148	0.296042	0.767322	0.519721	0.617645	0.439604	0.327524	0.409815	0.384211	0.537109	0.519218	0.480938	0.383679	0.45511	0.414374	0.297442	0.31514	0.429422	0.454468	0.273315	0.424751	2.37155e-08	0.325149	0.355054	0.45247	0.402145	0.468958	0.791826	0.450622	0.412463	0.325131	0.407148	0.531164	0.333728	0.392872	0.224329	0.686752	0.460069	0.310452
BRD-K48099440	prostaglandin-e1	56	0.327181	0.429666	0.539095	0.469079	0.395648	0.453575	0.444973	0.932003	0.81598	0.287146	0.64416	0.334637	0.564718	0.50368	0.397779	0.473139	0.413564	0.405222	0.557095	0.376144	0.394595	0.430343	0.523439	0.332844	0.416267	0.367403	0.408029	0.614307	0.415773	4.72866e-07	0.439712	0.384976	0.455077	0.411772	0.423481	0.806484	0.431187	0.297538	0.372852	0.432083	0.432107	0.24967	0.434832	0.192358	0.65596	0.472932	0.355607
BRD-K72726508	arcyriaflavin-a	56	0.338311	0.508829	0.576803	0.548296	0.531215	0.478061	0.47555	0.879138	0.850507	0.369944	0.727858	0.355678	0.511151	0.533869	0.489819	0.544085	0.408537	0.41268	0.56614	0.398808	0.410002	0.448903	0.468242	0.356945	0.39054	0.409927	0.40693	0.24043	0.401777	0.00475949	0.402826	0.476711	0.419721	0.418981	0.467577	0.646834	0.505199	0.351839	0.389939	0.448028	0.414879	0.303911	0.460218	0.14253	0.643136	0.402325	0.20961
BRD-K27062708	chlorotrianisene	56	0.343213	0.495015	0.486594	0.457659	0.316067	0.438404	0.341462	0.963176	0.892242	0.276113	0.711787	0.357291	0.491836	0.471987	0.362829	0.525094	0.410682	0.424737	0.553379	0.393281	0.407173	0.419269	0.515055	0.296016	0.408421	0.37636	0.425307	0.338328	0.321589	1.88224e-05	0.38648	0.382045	0.429564	0.441759	0.455007	0.646186	0.44859	0.266934	0.38	0.4972	0.419946	0.241799	0.455159	0.232647	0.458818	0.512178	0.337649
BRD-K24844714	fluorouracil	57	0.303578	0.253105	0.604748	0.686102	0.613017	0.525158	0.436073	0.911155	0.905916	0.153694	0.77484	0.52954	0.49342	0.641167	0.46061	0.582392	0.417637	0.434002	0.819357	0.452899	0.342835	0.518097	0.536086	0.42478	0.597555	0.345939	0.269168	0.141279	0.44549	0.000566978	0.524026	0.461902	0.42997	0.449738	0.63044	0.712942	0.583651	0.196064	0.334268	0.465562	0.546764	0.402199	0.404088	0.118224	0.731316	0.274145	0.177776
BRD-A19500257	geldanamycin	57	0.315799	0.717313	0.578836	0.537869	0.455722	0.591356	0.531117	0.840179	0.815365	0.526611	0.670393	0.523546	0.636407	0.629517	0.4611	0.568033	0.40911	0.508694	0.589883	0.474353	0.319733	0.416142	0.468239	0.372664	0.406448	0.551042	0.375815	0.249818	0.334574	0.00415678	0.45148	0.492927	0.35542	0.47361	0.529167	0.786339	0.368971	0.388616	0.48376	0.551061	0.37501	0.407747	0.527824	0.412932	0.581486	0.270922	0.115134
BRD-A81585303	acadesine	57	0.320767	0.386368	0.561771	0.501557	0.492285	0.488743	0.424551	0.850033	0.720139	0.287338	0.730733	0.535374	0.549276	0.422809	0.344686	0.444996	0.383524	0.540054	0.518732	0.46351	0.40898	0.465759	0.4259	0.281727	0.320747	0.41512	0.439266	0.325339	0.404194	3.58729e-08	0.372556	0.367886	0.459369	0.411585	0.47847	0.732198	0.465664	0.43319	0.327155	0.413141	0.563664	0.267649	0.414445	0.20449	0.722393	0.51085	0.245469
BRD-K28120222	parthenolide	57	0.333397	0.598827	0.544721	0.55247	0.525159	0.597505	0.456878	0.883147	0.856999	0.420272	0.495416	0.47665	0.568383	0.593008	0.488597	0.611527	0.404235	0.443751	0.593171	0.463682	0.350543	0.468424	0.481523	0.426586	0.404362	0.544467	0.405309	0.289749	0.422863	0.00635155	0.443386	0.493331	0.431077	0.465521	0.524085	0.739369	0.430327	0.348675	0.395111	0.438889	0.49822	0.31713	0.471817	0.239043	0.398731	0.299748	0.0824807
BRD-A24421185	butylscopolammonium	57	0.333897	0.401633	0.444885	0.419903	0.385006	0.386129	0.324811	0.892832	0.844297	0.253209	0.76444	0.338106	0.410448	0.418077	0.326329	0.473551	0.407678	0.429982	0.528894	0.382484	0.380159	0.397321	0.451749	0.39724	0.373772	0.360981	0.410885	0.401181	0.328386	3.80819e-05	0.370066	0.367084	0.452368	0.446597	0.435394	0.65699	0.450225	0.271845	0.369771	0.49034	0.418883	0.273446	0.44873	0.225387	0.450486	0.546408	0.369814
BRD-K51350053	toremifene	57	0.343535	0.643029	0.626646	0.533933	0.509489	0.539607	0.519887	0.921022	0.902137	0.457048	0.792378	0.444208	0.617074	0.701465	0.518394	0.590492	0.409677	0.393319	0.650746	0.393367	0.35702	0.41063	0.482121	0.344605	0.39513	0.456887	0.38426	0.43442	0.356141	0.00845865	0.381724	0.504597	0.418196	0.463608	0.495442	0.827553	0.433506	0.440132	0.472992	0.462455	0.42151	0.253656	0.366487	0.104003	0.689823	0.419884	0.326845
BRD-K40438880	spermidine	58	0.319022	0.359531	0.549841	0.480612	0.391181	0.436707	0.392601	0.819148	0.730904	0.354616	0.758188	0.521015	0.526665	0.388907	0.343228	0.39212	0.380592	0.532717	0.598279	0.477261	0.39259	0.445298	0.382466	0.254143	0.296877	0.437665	0.438266	0.322874	0.37149	3.73228e-09	0.368202	0.326385	0.453067	0.381395	0.466551	0.768465	0.462944	0.455052	0.324565	0.422541	0.507449	0.340792	0.39672	0.216463	0.679026	0.537429	0.32407
BRD-K70131229	glucosamine	58	0.32075	0.350269	0.516837	0.448699	0.369116	0.431772	0.375166	0.811382	0.605919	0.301106	0.690852	0.544036	0.500319	0.361376	0.315962	0.401852	0.379113	0.539135	0.513148	0.470913	0.381445	0.44554	0.369022	0.310213	0.281363	0.431161	0.448912	0.25322	0.364856	9.74244e-09	0.344748	0.313567	0.458487	0.386479	0.451844	0.64506	0.467674	0.419135	0.31039	0.420039	0.538312	0.336257	0.388531	0.20361	0.60931	0.551653	0.395164
BRD-K60460488	nelfinavir	58	0.323578	0.588266	0.596227	0.66424	0.652222	0.633767	0.430796	0.903628	0.927147	0.487937	0.721706	0.480582	0.655371	0.630602	0.446421	0.657828	0.403782	0.357587	0.732628	0.42896	0.316971	0.534029	0.523464	0.296679	0.329857	0.40457	0.37662	0.203491	0.420418	0.00940708	0.50296	0.437157	0.361811	0.435879	0.600335	0.795033	0.470785	0.305535	0.388979	0.507771	0.469126	0.467737	0.506194	0.334361	0.655652	0.253741	0.0391932
BRD-K78126613	menadione	58	0.327827	0.649989	0.767184	0.717466	0.650092	0.570413	0.653213	0.92904	0.924276	0.384152	0.798505	0.537301	0.541766	0.674622	0.602625	0.588742	0.422892	0.486269	0.751217	0.50343	0.336048	0.496452	0.427096	0.329093	0.535218	0.419516	0.419071	0.101181	0.415102	0.00120863	0.4387	0.550604	0.462973	0.472047	0.613675	0.863156	0.535516	0.268449	0.373023	0.47677	0.558309	0.383695	0.417676	0.141419	0.730995	0.264924	0.0664598
BRD-K25841245	pravastatin	58	0.332757	0.454469	0.491906	0.410224	0.321481	0.427994	0.413872	0.893721	0.888057	0.253328	0.613862	0.311653	0.568666	0.638456	0.421482	0.469566	0.419159	0.429444	0.629778	0.389672	0.409897	0.406063	0.480647	0.374191	0.40385	0.385046	0.412566	0.244309	0.364495	1.68295e-06	0.370527	0.394871	0.454825	0.453087	0.417356	0.638901	0.431462	0.293734	0.39327	0.437081	0.408368	0.160975	0.425374	0.246157	0.564966	0.499993	0.475005
BRD-A30582499	tiletamine	58	0.333105	0.425511	0.436147	0.405495	0.364369	0.455925	0.382143	0.939189	0.86899	0.2471	0.73327	0.293885	0.478245	0.474843	0.420372	0.437091	0.409786	0.431529	0.565917	0.349565	0.411564	0.413312	0.468296	0.421096	0.389862	0.372396	0.413839	0.350365	0.382998	1.7267e-06	0.413082	0.395948	0.452821	0.382604	0.395604	0.674225	0.418588	0.248305	0.37871	0.437185	0.409887	0.288341	0.436986	0.273411	0.54901	0.523337	0.253736
BRD-K30466858	ellagic-acid	59	0.325613	0.36495	0.564532	0.47694	0.353008	0.459556	0.407357	0.851482	0.619904	0.324074	0.709848	0.543743	0.580862	0.381488	0.337141	0.400773	0.387616	0.541958	0.553538	0.480281	0.413234	0.451884	0.39334	0.278128	0.298201	0.417915	0.440931	0.340682	0.415549	2.93821e-09	0.370248	0.349455	0.455082	0.41629	0.475876	0.755591	0.477711	0.427397	0.317165	0.421961	0.587488	0.397971	0.418033	0.127408	0.672333	0.515554	0.404494
BRD-K63116520	BRD-K63116520	59	0.325952	0.451996	0.530751	0.522058	0.377734	0.460775	0.410745	0.791014	0.727386	0.232919	0.738637	0.455957	0.445782	0.475854	0.365971	0.49163	0.377847	0.520472	0.581521	0.475794	0.359661	0.480888	0.3942	0.224901	0.287231	0.432631	0.43377	0.364847	0.361086	1.13986e-09	0.348447	0.351991	0.439412	0.368735	0.465904	0.640485	0.421742	0.395825	0.327999	0.424102	0.520212	0.251841	0.42037	0.14805	0.483111	0.546134	0.354024
BRD-K56700933	phenethyl-isothiocyanate	59	0.331341	0.632517	0.756379	0.600371	0.539691	0.509979	0.60436	0.891373	0.887373	0.409895	0.715005	0.558707	0.606645	0.667981	0.608075	0.548839	0.422841	0.525466	0.629426	0.444804	0.38085	0.408897	0.459321	0.302637	0.455612	0.445904	0.409553	0.0910155	0.435638	0.000189068	0.348652	0.515832	0.426115	0.470562	0.508666	0.801358	0.499241	0.382912	0.388735	0.462784	0.476886	0.352956	0.433065	0.28487	0.67529	0.242892	0.0993749
BRD-A52530852	BRD-A52530852	59	0.331687	0.440219	0.526236	0.52482	0.381795	0.47108	0.398684	0.816009	0.733026	0.20941	0.688157	0.475078	0.459689	0.425661	0.373933	0.461144	0.380113	0.517639	0.615963	0.480637	0.37219	0.476835	0.414493	0.272028	0.298664	0.425901	0.435035	0.3219	0.398685	2.34262e-09	0.338531	0.369596	0.432596	0.385867	0.469654	0.693436	0.438931	0.443406	0.319703	0.42303	0.560001	0.251142	0.419892	0.126907	0.486053	0.571966	0.427774
BRD-K26171350	adrenosterone	59	0.335395	0.388161	0.459081	0.408333	0.343927	0.431813	0.380145	0.888746	0.76563	0.31709	0.599414	0.311249	0.480322	0.457754	0.399491	0.464219	0.414859	0.424416	0.624222	0.376136	0.410164	0.411454	0.457973	0.402014	0.415441	0.378157	0.409236	0.37774	0.409409	2.38027e-06	0.413344	0.416531	0.457385	0.417092	0.397488	0.84031	0.435342	0.358337	0.375593	0.454155	0.416409	0.197807	0.428358	0.162463	0.502588	0.526867	0.304738
BRD-K62737565	gabapentin	59	0.337617	0.430004	0.481235	0.413675	0.319094	0.413028	0.40226	0.923074	0.792586	0.355606	0.70513	0.33494	0.389425	0.478101	0.420969	0.509095	0.4202	0.417616	0.586043	0.372939	0.429754	0.41748	0.438414	0.41444	0.401678	0.352482	0.410904	0.55799	0.344808	1.91726e-06	0.40393	0.417345	0.441879	0.429213	0.402115	0.751294	0.427101	0.2547	0.36948	0.453044	0.417184	0.411819	0.420967	0.536896	0.546807	0.551732	0.254932
BRD-A24381660	zeranol	59	0.337925	0.529552	0.538915	0.450936	0.488613	0.470385	0.451487	0.901377	0.811244	0.302734	0.623786	0.394242	0.449491	0.528733	0.507235	0.598485	0.405561	0.414007	0.639236	0.373139	0.422012	0.407067	0.45853	0.413051	0.382643	0.399961	0.387567	0.427987	0.412659	0.00497404	0.381706	0.442414	0.4468	0.428527	0.396979	0.741168	0.444026	0.35673	0.387346	0.460339	0.437115	0.352618	0.436591	0.14501	0.494379	0.44955	0.24956
BRD-A37052580	physostigmine	59	0.351429	0.511806	0.529378	0.429193	0.327423	0.433123	0.396035	0.839627	0.55623	0.332411	0.657232	0.369823	0.462977	0.394324	0.476784	0.55193	0.401277	0.425949	0.448226	0.375766	0.409957	0.388558	0.425269	0.437261	0.34066	0.413977	0.407286	0.488143	0.393261	0.00459141	0.383113	0.433232	0.45725	0.407317	0.383146	0.396855	0.427805	0.354389	0.378257	0.457904	0.404737	0.416786	0.415799	0.202377	0.489979	0.494674	0.453014
BRD-K50590187	capsaicin	60	0.326222	0.384858	0.576963	0.499977	0.357824	0.469678	0.383112	0.88203	0.834147	0.333099	0.728254	0.485194	0.443791	0.332493	0.343795	0.460591	0.386964	0.559661	0.55912	0.491439	0.350238	0.462599	0.396988	0.26957	0.356196	0.459434	0.441673	0.328123	0.363062	5.15358e-09	0.360449	0.370858	0.454328	0.389503	0.477445	0.793366	0.45032	0.444681	0.325579	0.419632	0.503127	0.355728	0.402439	0.219761	0.704328	0.513053	0.426772
BRD-K10670311	sulfasalazine	60	0.347346	0.491417	0.542119	0.430902	0.412166	0.459101	0.426496	0.904363	0.785491	0.385904	0.67747	0.397047	0.456354	0.540889	0.481809	0.570266	0.409923	0.420353	0.600906	0.383141	0.467748	0.414531	0.488177	0.420696	0.412718	0.395842	0.399465	0.48727	0.369077	0.00125392	0.426975	0.423022	0.44614	0.434454	0.400243	0.649403	0.45733	0.323464	0.399433	0.460285	0.446591	0.356256	0.462786	0.413164	0.530231	0.473227	0.290803
BRD-K43236057	piceid	60	0.348135	0.47556	0.48675	0.415939	0.356418	0.429096	0.378803	0.852376	0.821466	0.334928	0.619375	0.352649	0.421536	0.44842	0.458225	0.554378	0.402324	0.41889	0.539529	0.369843	0.415412	0.390475	0.420294	0.416592	0.347779	0.405873	0.396863	0.475213	0.348013	0.00402977	0.387778	0.408215	0.456872	0.411319	0.378727	0.636566	0.429775	0.343768	0.379603	0.457454	0.414318	0.368796	0.428001	0.174848	0.440567	0.514159	0.414846
BRD-A24543851	nornicotine	60	0.349766	0.502639	0.523529	0.433229	0.355526	0.462378	0.405514	0.883753	0.759428	0.299134	0.586414	0.352358	0.478339	0.463366	0.482329	0.564342	0.403156	0.4215	0.590563	0.379339	0.424672	0.408947	0.476728	0.442513	0.360701	0.411286	0.397492	0.414923	0.380375	0.00163911	0.392143	0.44767	0.450577	0.407389	0.389385	0.669264	0.431403	0.339722	0.383114	0.444599	0.400157	0.392856	0.432655	0.209957	0.474306	0.49678	0.310086
BRD-K57631554	aminolevulinic-acid	60	0.349998	0.41921	0.404925	0.521582	0.635978	0.44693	0.421163	0.930436	0.735975	0.466003	0.350148	0.457531	0.49982	0.481658	0.364733	0.487276	0.411577	0.444764	0.62601	0.489917	0.324997	0.526036	0.433516	0.38912	0.424493	0.384904	0.405335	0.244366	0.345767	0.241927	0.520042	0.396924	0.447334	0.440372	0.439516	0.762594	0.604197	0.460924	0.386006	0.474078	0.480056	0.322049	0.394666	0.198969	0.304623	0.514933	0.203629
BRD-K93618743	ipriflavone	60	0.351151	0.499353	0.531964	0.432732	0.391094	0.467107	0.41826	0.86716	0.80873	0.328029	0.625215	0.390417	0.464395	0.499584	0.487744	0.570193	0.403609	0.417583	0.593192	0.374543	0.446041	0.398743	0.459171	0.460795	0.371809	0.397194	0.401777	0.424592	0.393988	0.00041863	0.387144	0.441419	0.458457	0.417303	0.38866	0.615824	0.459521	0.35226	0.396143	0.474428	0.433793	0.438125	0.45886	0.233666	0.469786	0.50486	0.309197
BRD-K42352790	anandamide	61	0.333771	0.424207	0.53521	0.477469	0.394249	0.455173	0.403362	0.816528	0.71448	0.371966	0.753525	0.509308	0.589404	0.455312	0.343996	0.44718	0.388008	0.569198	0.535151	0.484278	0.399868	0.454862	0.396839	0.264941	0.343361	0.435368	0.441939	0.332525	0.369131	7.00478e-09	0.359087	0.356564	0.447979	0.404404	0.464557	0.706057	0.463288	0.468278	0.329658	0.420987	0.520531	0.4736	0.380225	0.224504	0.634404	0.509973	0.443151
BRD-A14999564	geranyl-geranyl-pyrophosphate	62	0.322403	0.456987	0.509803	0.574301	0.40996	0.471577	0.385786	0.787135	0.663125	0.234645	0.654849	0.461375	0.488647	0.479814	0.369854	0.51444	0.375872	0.53672	0.58079	0.478501	0.370418	0.46741	0.438729	0.220335	0.292588	0.429012	0.440722	0.219763	0.379917	1.12999e-09	0.369693	0.367378	0.450037	0.391604	0.482092	0.620776	0.436221	0.426653	0.317008	0.426544	0.549177	0.164029	0.421932	0.0923119	0.514919	0.525155	0.419468
BRD-K54028654	trehalose	62	0.329565	0.365761	0.565339	0.46504	0.396455	0.47229	0.392928	0.85183	0.65846	0.313286	0.763289	0.50775	0.577639	0.412346	0.343171	0.42249	0.385536	0.538997	0.563599	0.48448	0.390772	0.450254	0.393441	0.305536	0.328186	0.425534	0.44353	0.297737	0.385265	1.40961e-08	0.330765	0.33599	0.448024	0.390687	0.446626	0.783514	0.458572	0.384108	0.315	0.422451	0.519193	0.403691	0.415104	0.235512	0.673384	0.520096	0.381599
BRD-K95847244	BRD-K95847244	62	0.331045	0.465802	0.51501	0.509025	0.354569	0.450381	0.382161	0.815864	0.698369	0.218103	0.662021	0.441149	0.472566	0.425078	0.34906	0.454141	0.376148	0.529421	0.585891	0.481542	0.375623	0.469336	0.378376	0.307369	0.299335	0.446615	0.441649	0.277069	0.356046	1.78993e-09	0.355019	0.349204	0.447963	0.379108	0.468979	0.631339	0.427239	0.444666	0.320258	0.421011	0.537812	0.203203	0.408123	0.116793	0.422456	0.567342	0.476515
BRD-K33422401	PMSF	62	0.332302	0.368925	0.55561	0.482046	0.352055	0.458859	0.388419	0.82124	0.612704	0.338593	0.726799	0.520882	0.572211	0.367453	0.326286	0.41333	0.382186	0.544901	0.476574	0.470903	0.404354	0.446817	0.403887	0.339735	0.307927	0.43539	0.442936	0.342659	0.383942	6.11927e-09	0.349264	0.333939	0.459468	0.411424	0.474988	0.703552	0.456497	0.427248	0.322414	0.42219	0.516695	0.464081	0.398485	0.212464	0.65594	0.57202	0.595094
BRD-K18436203	1,2,3,4-tetrahydroisoquinoline	62	0.334352	0.424484	0.518434	0.477719	0.403383	0.47449	0.378016	0.822546	0.778144	0.247051	0.6986	0.421866	0.545593	0.473143	0.373409	0.499778	0.378964	0.518253	0.489671	0.470287	0.396197	0.467438	0.42761	0.271785	0.301845	0.444071	0.439596	0.312091	0.407374	1.452e-09	0.354236	0.362662	0.446667	0.393422	0.449685	0.655436	0.421317	0.422468	0.323776	0.422688	0.52904	0.261852	0.436071	0.128737	0.522668	0.585948	0.343669
BRD-A93048969	BRD-A93048969	62	0.34751	0.539944	0.530413	0.415839	0.380879	0.458116	0.395007	0.872742	0.793911	0.305349	0.599658	0.348192	0.443079	0.482518	0.481162	0.588656	0.401972	0.410016	0.56835	0.367905	0.421685	0.39614	0.441542	0.4333	0.343744	0.408926	0.395686	0.466696	0.366519	0.00248503	0.382618	0.426555	0.452492	0.403572	0.371283	0.700917	0.416498	0.337047	0.383596	0.463954	0.410649	0.353132	0.42863	0.176587	0.472161	0.520689	0.363728
BRD-K13533483	cyclosporin-a	62	0.348095	0.624297	0.617501	0.529429	0.509277	0.526814	0.47092	0.924622	0.88676	0.448585	0.738393	0.353046	0.687798	0.58375	0.464599	0.524145	0.404972	0.41103	0.501316	0.400322	0.411404	0.415136	0.461144	0.413601	0.376028	0.446546	0.40364	0.391508	0.434409	0.000875237	0.37585	0.530854	0.398602	0.447919	0.45817	0.843787	0.458578	0.423597	0.439922	0.464718	0.396688	0.277855	0.402416	0.257103	0.650041	0.333825	0.254347
BRD-A03323675	ritonavir	62	0.353214	0.472662	0.511123	0.603329	0.560752	0.451927	0.432386	0.909622	0.835875	0.431358	0.783617	0.441372	0.597499	0.643272	0.327188	0.460824	0.409604	0.410829	0.586578	0.397301	0.352302	0.411361	0.485166	0.286662	0.453999	0.436087	0.409638	0.224185	0.313712	0.134517	0.377086	0.44669	0.45119	0.52508	0.527108	0.743934	0.499271	0.39933	0.401513	0.461921	0.42925	0.295895	0.379734	0.308683	0.619442	0.50326	0.0889941
BRD-K15933101	ropinirole	62	0.360584	0.426824	0.488687	0.419223	0.385024	0.419362	0.393338	0.852654	0.795614	0.341751	0.666089	0.326559	0.429664	0.467142	0.423479	0.435342	0.40697	0.391552	0.522296	0.37339	0.411224	0.383386	0.387712	0.404398	0.366729	0.374678	0.369551	0.552988	0.350237	0.00269907	0.370127	0.421811	0.426745	0.409443	0.375739	0.60494	0.426326	0.3586	0.373977	0.425676	0.408592	0.398692	0.361944	0.0856126	0.485233	0.423001	0.78081
BRD-K70555272	oligomycin-a	63	0.246069	0.861196	0.694837	0.86979	0.644037	0.902473	0.551518	0.956632	0.836056	0.571433	0.771261	0.649089	0.835345	0.875081	0.131146	0.567101	0.403932	0.0623208	0.856205	0.576758	0.229386	0.606038	0.299131	0.0959027	0.566597	0.390942	0.362252	0.274433	0.358148	3.25889e-08	0.651658	0.133215	0.178996	0.493681	0.857045	0.780884	0.392243	0.0223075	0.230848	0.716114	0.370841	0.438077	0.916821	0.0199729	0.686987	0.0127607	4.06881e-09
BRD-K69023402	thapsigargin	63	0.325836	0.627427	0.6602	0.632052	0.500798	0.641331	0.586606	0.861825	0.858396	0.462798	0.726089	0.49971	0.579465	0.637108	0.506949	0.579673	0.402881	0.472413	0.586893	0.549351	0.334444	0.506138	0.535503	0.281518	0.483556	0.442992	0.430558	0.20013	0.411559	0.00161855	0.478264	0.508074	0.369382	0.472054	0.587545	0.775908	0.524686	0.423239	0.41072	0.560223	0.510441	0.295958	0.512894	0.268553	0.666949	0.272066	0.0963814
BRD-A26112980	salsolinol	63	0.332772	0.440728	0.505062	0.52807	0.422783	0.467472	0.376575	0.806786	0.765131	0.238544	0.703948	0.435586	0.49674	0.48008	0.375968	0.493468	0.381562	0.524206	0.638701	0.489815	0.378791	0.476686	0.408173	0.267006	0.27426	0.443637	0.443377	0.321615	0.410793	1.46123e-09	0.352093	0.346786	0.437233	0.374348	0.472388	0.664608	0.427303	0.425816	0.311737	0.413917	0.540129	0.264984	0.432171	0.129634	0.388286	0.547386	0.520074
BRD-K17497770	butein	63	0.334955	0.681719	0.603591	0.555623	0.542193	0.624071	0.581449	0.9243	0.898848	0.429896	0.63386	0.405439	0.674176	0.61521	0.502184	0.567603	0.413346	0.402313	0.642727	0.403314	0.411261	0.465664	0.502685	0.401878	0.383174	0.457564	0.39777	0.193433	0.41471	0.00373962	0.444553	0.578213	0.405475	0.516765	0.495979	0.86752	0.459195	0.388451	0.421106	0.434138	0.456451	0.236459	0.443094	0.178346	0.558988	0.200654	0.122007
BRD-K37691127	hinokitiol	63	0.339666	0.544426	0.587728	0.664445	0.493872	0.477488	0.516366	0.881514	0.903712	0.50438	0.687995	0.384286	0.561025	0.648503	0.513659	0.614262	0.41198	0.404172	0.702717	0.497928	0.37324	0.46987	0.438912	0.428393	0.518027	0.399173	0.397101	0.268087	0.400619	0.00539333	0.448531	0.54532	0.418073	0.459145	0.636291	0.787427	0.537528	0.384872	0.442287	0.453476	0.404478	0.268681	0.385379	0.108872	0.674626	0.273349	0.144117
BRD-K35862502	pregnenolone	63	0.340429	0.369309	0.446621	0.434269	0.371528	0.3818	0.327374	0.920699	0.822592	0.26275	0.634135	0.364721	0.419145	0.400798	0.324493	0.441598	0.403428	0.425126	0.569262	0.375412	0.399369	0.396976	0.426935	0.503164	0.397723	0.383445	0.409653	0.419311	0.353324	5.9015e-06	0.379777	0.38452	0.458108	0.44203	0.425796	0.682372	0.434284	0.294654	0.375644	0.470474	0.418	0.224973	0.454453	0.233552	0.443631	0.533681	0.293385
BRD-K85090592	pilocarpine	64	0.352634	0.502639	0.548594	0.440644	0.414992	0.462939	0.419701	0.886073	0.803188	0.308225	0.663255	0.363337	0.509881	0.525319	0.463076	0.5536	0.408562	0.429647	0.552002	0.372034	0.453924	0.39591	0.472805	0.424733	0.376284	0.400691	0.398586	0.633435	0.332626	0.00114418	0.414165	0.439614	0.441527	0.454769	0.391883	0.719515	0.469037	0.32098	0.387694	0.461273	0.438044	0.331098	0.460084	0.185715	0.524658	0.504865	0.360789
BRD-K64994968	progesterone	64	0.35629	0.519108	0.548788	0.480377	0.472318	0.481586	0.443643	0.885261	0.846575	0.470259	0.655593	0.409594	0.593494	0.505542	0.440146	0.520164	0.401394	0.45286	0.580972	0.409351	0.397469	0.419577	0.430693	0.469118	0.37772	0.430874	0.400022	0.359788	0.358912	0.0259539	0.367006	0.446747	0.439335	0.411878	0.409313	0.757045	0.454755	0.42857	0.392006	0.444989	0.439628	0.48571	0.383572	0.121991	0.573043	0.424358	0.271155
BRD-K62910157	C2-dihydroceramide	65	0.33466	0.531384	0.572346	0.525455	0.37407	0.531672	0.467595	0.873935	0.716831	0.389626	0.825496	0.494727	0.739111	0.610424	0.3675	0.492062	0.399839	0.563693	0.624995	0.515163	0.439332	0.465513	0.492315	0.188108	0.383331	0.41682	0.428088	0.329065	0.41621	1.13025e-08	0.369777	0.424782	0.415858	0.42033	0.515697	0.763594	0.485993	0.38074	0.352645	0.414386	0.504133	0.434863	0.377682	0.289953	0.732175	0.3589	0.381403
BRD-K08316444	rotenone	65	0.334939	0.417902	0.544013	0.517822	0.314294	0.470631	0.424784	0.862353	0.851349	0.425357	0.742726	0.507606	0.572636	0.424871	0.293207	0.461315	0.388684	0.522546	0.49893	0.512659	0.431614	0.453459	0.478428	0.347284	0.309531	0.427024	0.450626	0.186341	0.456897	7.25301e-09	0.340711	0.376373	0.443041	0.416462	0.500102	0.698972	0.469006	0.404211	0.321256	0.41814	0.563531	0.372958	0.389639	0.141026	0.663759	0.429045	0.235351
BRD-K04809113	hydroxytyrosol	65	0.339033	0.476101	0.525262	0.524556	0.422959	0.474849	0.391052	0.827208	0.733279	0.271635	0.704914	0.44932	0.553623	0.451552	0.366599	0.515917	0.379151	0.518271	0.575296	0.498403	0.371245	0.481494	0.405846	0.262259	0.309824	0.437334	0.442733	0.390305	0.401586	4.64753e-09	0.362087	0.36551	0.443492	0.391693	0.472632	0.686642	0.447227	0.483886	0.320697	0.414747	0.546428	0.229783	0.408194	0.120111	0.467757	0.548944	0.400124
BRD-K92870997	pterostilbene	65	0.349817	0.469766	0.588499	0.550408	0.460069	0.519676	0.463625	0.894701	0.860201	0.35825	0.734619	0.465855	0.523753	0.529243	0.475927	0.603566	0.401309	0.489663	0.649546	0.455544	0.400194	0.482744	0.462193	0.373147	0.400154	0.4308	0.408099	0.359153	0.42953	0.00147412	0.39948	0.430283	0.453593	0.438364	0.48278	0.74177	0.468661	0.397603	0.368776	0.473465	0.510309	0.493193	0.460442	0.196029	0.585906	0.439652	0.255661
BRD-K16336526	capsaicin	65	0.354711	0.456726	0.488787	0.443791	0.504104	0.494985	0.410754	0.892386	0.824296	0.350136	0.595209	0.366345	0.384942	0.407246	0.512429	0.657791	0.409164	0.409992	0.628209	0.385023	0.371419	0.438893	0.411709	0.512526	0.416756	0.427333	0.385576	0.508812	0.378428	0.00210581	0.367997	0.487505	0.456181	0.408463	0.403231	0.791068	0.43041	0.36388	0.390702	0.489659	0.404616	0.557488	0.411292	0.171478	0.517929	0.469587	0.277114
BRD-K30984264	harmine	66	0.335105	0.4314	0.597392	0.522623	0.528539	0.476195	0.406203	0.862131	0.76449	0.277696	0.787939	0.527371	0.615898	0.491367	0.365758	0.447612	0.380597	0.567302	0.606567	0.48704	0.410391	0.450151	0.411372	0.311375	0.362626	0.430487	0.448024	0.234219	0.418066	1.03836e-09	0.357308	0.379671	0.446489	0.430989	0.47643	0.749292	0.448776	0.422384	0.322561	0.425865	0.508705	0.320007	0.432815	0.190421	0.651573	0.417492	0.468085
BRD-K61559475	cardamonin	66	0.336943	0.461043	0.552185	0.496085	0.407957	0.456396	0.449397	0.828537	0.756158	0.375198	0.670357	0.529902	0.600528	0.440506	0.344513	0.436664	0.381193	0.562054	0.548172	0.47887	0.41064	0.458905	0.380356	0.323232	0.307677	0.447562	0.441713	0.303456	0.415967	1.13146e-08	0.357509	0.372126	0.45126	0.419717	0.476496	0.805673	0.447589	0.474835	0.325897	0.425449	0.540643	0.353703	0.405983	0.227108	0.632644	0.497362	0.293908
BRD-K36756879	ethaverine	66	0.344159	0.501694	0.568013	0.587634	0.368939	0.468473	0.427444	0.965617	0.914313	0.306254	0.542534	0.395795	0.453635	0.56273	0.415169	0.529805	0.420768	0.419971	0.693728	0.398595	0.416152	0.4369	0.484743	0.374065	0.451153	0.385479	0.437485	0.461993	0.454808	5.40066e-07	0.455622	0.427711	0.435663	0.431414	0.461787	0.818757	0.46698	0.336665	0.37124	0.474177	0.429789	0.34953	0.436806	0.32553	0.527205	0.506514	0.2542
BRD-K30296925	flavokavain-b	66	0.350987	0.632243	0.58964	0.506647	0.430823	0.561901	0.507973	0.926323	0.893252	0.371951	0.535636	0.396708	0.630198	0.584645	0.480354	0.595067	0.410245	0.456624	0.550806	0.403325	0.414798	0.450033	0.464556	0.481602	0.370775	0.46945	0.401192	0.337089	0.436133	0.00191439	0.434708	0.520866	0.428221	0.476951	0.471005	0.829043	0.455619	0.338417	0.397795	0.442109	0.418458	0.293875	0.47403	0.191136	0.511469	0.31767	0.202398
BRD-K22009844	phenprobamate	66	0.353702	0.493495	0.521936	0.43606	0.358734	0.435879	0.396989	0.844355	0.78789	0.321083	0.597009	0.360153	0.419546	0.453009	0.460298	0.545133	0.399426	0.423569	0.59511	0.379005	0.442121	0.399442	0.437512	0.473653	0.356078	0.408389	0.404498	0.491	0.403864	0.0018774	0.381598	0.435275	0.448832	0.405404	0.381886	0.612816	0.435915	0.349692	0.377467	0.459104	0.404606	0.427703	0.428419	0.189756	0.479185	0.515689	0.313982
BRD-K91370081	anisomycin	67	0.28026	0.699032	0.842799	0.89101	0.814587	0.77175	0.837556	0.966563	0.956017	0.0899973	0.935977	0.681231	0.638942	0.726412	0.731788	0.414588	0.394993	0.642695	0.96038	0.567689	0.10263	0.48722	0.410018	0.202033	0.766304	0.327635	0.562244	0.00104883	0.23778	0.000309706	0.525824	0.811067	0.738715	0.331016	0.614691	0.954944	0.582815	0.199176	0.24633	0.366536	0.61459	0.0819186	0.28297	0.023076	0.895823	0.0481506	0.0446362
BRD-K06792661	narciclasine	67	0.280676	0.736666	0.916689	0.94746	0.872694	0.768979	0.898394	0.980244	0.991413	0.125634	0.972764	0.773163	0.638632	0.812296	0.796391	0.457821	0.407977	0.754473	0.991294	0.651532	0.0820399	0.49721	0.365881	0.144223	0.897528	0.347817	0.553894	0.000564963	0.274028	3.10633e-05	0.514028	0.820879	0.839552	0.351923	0.703516	0.980583	0.628167	0.155794	0.224276	0.437793	0.694652	0.155325	0.316372	0.0423059	0.949135	0.0626686	0.00389213
BRD-A77144340	ketocholesterol	67	0.320053	0.290861	0.545778	0.453531	0.400152	0.446622	0.36236	0.819577	0.584798	0.268379	0.745082	0.510106	0.513363	0.359565	0.303054	0.379056	0.382771	0.540188	0.553453	0.470727	0.424518	0.437509	0.342973	0.364906	0.298753	0.392639	0.446549	0.193269	0.43682	4.62666e-07	0.359187	0.290452	0.447622	0.372807	0.441112	0.630846	0.460912	0.329321	0.28295	0.414644	0.511931	0.55463	0.395048	0.290256	0.521342	0.521219	0.455104
BRD-K67265981	carnosol	67	0.333219	0.439086	0.586053	0.507754	0.46122	0.491	0.467228	0.896687	0.790554	0.313839	0.749176	0.525196	0.652862	0.423963	0.33612	0.470068	0.386147	0.555267	0.56082	0.502067	0.411855	0.475962	0.449981	0.296431	0.341699	0.430038	0.442241	0.332812	0.436845	6.33178e-09	0.392049	0.390793	0.446289	0.435028	0.485471	0.787968	0.488214	0.460805	0.321151	0.425668	0.581943	0.261941	0.401182	0.239935	0.654754	0.436277	0.310469
BRD-K97808269	BRD-K97808269	67	0.340616	0.410524	0.576157	0.478216	0.401766	0.453083	0.384546	0.835618	0.712439	0.373608	0.74575	0.519291	0.634494	0.39037	0.381645	0.459136	0.388809	0.575811	0.433142	0.482541	0.38159	0.448259	0.424715	0.294549	0.368204	0.444067	0.439318	0.406672	0.383595	5.08651e-08	0.354199	0.356426	0.455824	0.412561	0.465583	0.789385	0.457278	0.461643	0.331224	0.420609	0.512493	0.463281	0.388563	0.330504	0.659203	0.559097	0.436734
BRD-K39256324	rottlerin	67	0.346583	0.658229	0.641981	0.642326	0.650749	0.610178	0.568388	0.934006	0.881842	0.43642	0.788135	0.502003	0.613105	0.608618	0.485759	0.565201	0.412163	0.405114	0.697923	0.457394	0.398602	0.532606	0.50377	0.352389	0.437988	0.414357	0.40276	0.222423	0.44134	0.00727034	0.468634	0.541544	0.426056	0.486086	0.564334	0.793174	0.504574	0.361327	0.435451	0.498447	0.48548	0.318642	0.465961	0.1425	0.685627	0.324651	0.0820179
BRD-K94144010	cotinine	67	0.354364	0.52194	0.559497	0.471065	0.475148	0.513348	0.463373	0.869822	0.865656	0.37806	0.614816	0.434118	0.501994	0.543741	0.544737	0.644943	0.408959	0.422062	0.638895	0.398523	0.387493	0.434106	0.458353	0.406315	0.400653	0.41848	0.40115	0.386058	0.346277	0.0954935	0.447919	0.455002	0.442606	0.412336	0.405846	0.745388	0.489462	0.411645	0.405663	0.4784	0.443789	0.396529	0.39807	0.152567	0.537801	0.46857	0.253882
BRD-K57139258	z-guggulsterone	68	0.338356	0.378423	0.547333	0.471618	0.367333	0.45302	0.378166	0.856236	0.63466	0.363468	0.660354	0.495164	0.546607	0.376136	0.327673	0.421258	0.381752	0.578669	0.524267	0.481035	0.377162	0.453864	0.393898	0.314998	0.334581	0.458433	0.449089	0.380733	0.387384	5.85362e-08	0.343787	0.349459	0.451179	0.408441	0.467589	0.730686	0.463443	0.445896	0.323198	0.413774	0.505493	0.415905	0.409847	0.272384	0.637242	0.546994	0.434474
BRD-K08727137	alfadolone	68	0.340984	0.433613	0.473712	0.439973	0.347985	0.419185	0.4218	0.875147	0.76759	0.337695	0.631443	0.333185	0.530292	0.499245	0.357597	0.498903	0.416054	0.421135	0.513356	0.365125	0.442805	0.412017	0.531	0.435235	0.409207	0.374609	0.396023	0.41045	0.405522	1.83999e-06	0.405321	0.402889	0.445392	0.422539	0.410054	0.560812	0.42077	0.308049	0.383551	0.459762	0.426862	0.300778	0.429741	0.267588	0.589946	0.543749	0.359151
BRD-A79479878	testosterone	68	0.35266	0.493757	0.450467	0.583244	0.636715	0.458735	0.483079	0.883048	0.795661	0.466368	0.724949	0.440204	0.565343	0.548584	0.38529	0.483065	0.412363	0.421849	0.575072	0.473833	0.343747	0.480816	0.453428	0.357868	0.453431	0.391014	0.395941	0.296259	0.313936	0.227854	0.469963	0.430398	0.451834	0.460546	0.463197	0.727624	0.550994	0.436146	0.390482	0.472378	0.470328	0.320044	0.327257	0.254302	0.567918	0.518014	0.106251
BRD-K84709232	caffeic-acid	68	0.358454	0.660607	0.623649	0.578286	0.48294	0.577676	0.524064	0.936517	0.918536	0.494792	0.63688	0.387186	0.659646	0.609754	0.503949	0.581577	0.405952	0.429015	0.579538	0.423142	0.388648	0.441414	0.467318	0.432028	0.404005	0.469179	0.410422	0.36552	0.417581	0.00232094	0.412578	0.555364	0.407137	0.464116	0.529362	0.8521	0.463972	0.438692	0.438203	0.442145	0.415305	0.309918	0.443554	0.264278	0.547891	0.31706	0.160214
BRD-K85985071	ellipticine	69	0.292905	0.464567	0.651932	0.78697	0.644538	0.534833	0.475095	0.797911	0.827004	0.522464	0.765801	0.557393	0.516043	0.694939	0.533204	0.561665	0.400824	0.555304	0.758266	0.501467	0.249328	0.503648	0.528103	0.206637	0.519416	0.306615	0.346989	0.115633	0.438816	0.000268887	0.53998	0.538504	0.573454	0.471934	0.64896	0.780397	0.680341	0.47919	0.358584	0.557105	0.752442	0.526709	0.591899	0.108863	0.726461	0.0905953	0.0740856
BRD-K99667445	licochalcone-a	69	0.330237	0.328739	0.538591	0.459745	0.388682	0.466504	0.390216	0.812621	0.709316	0.312182	0.677959	0.475484	0.510883	0.332293	0.317282	0.440787	0.388812	0.59557	0.588842	0.482588	0.465262	0.448793	0.399494	0.34178	0.300175	0.397162	0.449265	0.173998	0.425624	3.3041e-09	0.389249	0.319012	0.443169	0.370804	0.434517	0.617653	0.464632	0.347534	0.286696	0.418117	0.500997	0.576117	0.412614	0.265561	0.618126	0.426957	0.376969
BRD-K43807558	BRD-K43807558	69	0.338359	0.4741	0.517926	0.526617	0.455219	0.493621	0.384422	0.833348	0.769981	0.254954	0.69862	0.458951	0.58379	0.505366	0.34997	0.502277	0.38463	0.508395	0.687613	0.493465	0.376069	0.470599	0.393465	0.242591	0.308739	0.435265	0.439939	0.363752	0.427783	2.80813e-09	0.375101	0.36103	0.438286	0.416742	0.477149	0.675837	0.447693	0.473428	0.308317	0.421604	0.570798	0.296313	0.428681	0.221028	0.472062	0.451926	0.444086
BRD-K45882009	dihydrocapsaicin	69	0.342224	0.475816	0.606388	0.5033	0.432868	0.496189	0.494146	0.867094	0.811772	0.384747	0.755766	0.530311	0.664802	0.542405	0.369626	0.467061	0.390709	0.540098	0.431671	0.491894	0.416036	0.474599	0.477387	0.346612	0.369296	0.465044	0.439338	0.289029	0.439418	1.96366e-08	0.352079	0.403251	0.454361	0.455455	0.487951	0.809159	0.475709	0.44135	0.327685	0.42325	0.576872	0.29935	0.418119	0.262358	0.689078	0.441181	0.322661
BRD-A49225603	alimemazine	69	0.344044	0.757854	0.677295	0.552718	0.517181	0.563664	0.565686	0.927989	0.885908	0.590202	0.836974	0.476869	0.725089	0.748802	0.588765	0.549052	0.40447	0.39391	0.605056	0.396328	0.284888	0.379938	0.499834	0.275305	0.449588	0.492263	0.365458	0.273054	0.332497	0.00330056	0.296485	0.538277	0.391439	0.459776	0.537579	0.923733	0.39888	0.57608	0.549333	0.458629	0.415568	0.193211	0.273451	0.148304	0.699268	0.398661	0.187198
BRD-K40758068	efavirenz	69	0.352668	0.5013	0.524476	0.458216	0.456702	0.458628	0.408724	0.887984	0.831417	0.254865	0.711973	0.405092	0.456423	0.483985	0.428971	0.562788	0.40561	0.43732	0.61928	0.378324	0.429206	0.398631	0.492952	0.434759	0.391891	0.402236	0.402718	0.340228	0.357297	0.00125528	0.39773	0.414421	0.450835	0.438455	0.401777	0.679184	0.449873	0.269076	0.380385	0.463585	0.425265	0.334652	0.439625	0.204519	0.520375	0.444484	0.212619
BRD-K94649603	taxifolin	69	0.357152	0.517593	0.520282	0.41558	0.448643	0.482586	0.43484	0.890346	0.846136	0.336512	0.607733	0.390961	0.482219	0.538818	0.511792	0.604122	0.409931	0.416853	0.629686	0.382766	0.435058	0.404236	0.476622	0.461423	0.399586	0.422915	0.405341	0.407868	0.381338	0.00229882	0.403682	0.476888	0.450702	0.436318	0.377436	0.735971	0.466105	0.406464	0.39977	0.465945	0.434068	0.47802	0.45295	0.174432	0.542872	0.508535	0.409523
BRD-K68584490	butyrolactone	70	0.339318	0.410599	0.571779	0.478155	0.408717	0.486014	0.437492	0.837553	0.710421	0.309326	0.794627	0.549598	0.66822	0.479225	0.344003	0.423753	0.39114	0.522239	0.564746	0.498066	0.45667	0.452118	0.439399	0.268178	0.337616	0.432286	0.440573	0.441172	0.435992	2.57413e-07	0.341831	0.360215	0.456717	0.428803	0.466962	0.772226	0.482504	0.455405	0.317685	0.414427	0.556851	0.389816	0.417455	0.255411	0.688787	0.494905	0.405348
BRD-K55375480	monensin	70	0.342669	0.60429	0.58201	0.565662	0.416276	0.490583	0.444839	0.951966	0.912902	0.449621	0.745451	0.492011	0.590453	0.630523	0.40784	0.512355	0.414096	0.412556	0.620286	0.404399	0.339308	0.42291	0.510466	0.287542	0.537076	0.436401	0.419198	0.485241	0.326139	2.98786e-06	0.405666	0.473521	0.414372	0.509688	0.577389	0.910804	0.456831	0.366985	0.443755	0.496772	0.451454	0.263271	0.39307	0.142088	0.570799	0.481013	0.259571
BRD-K47244735	progesterone	70	0.354724	0.488827	0.485266	0.397056	0.271928	0.380596	0.330681	0.957092	0.913746	0.33812	0.622163	0.327565	0.566242	0.472993	0.358952	0.500129	0.406398	0.425778	0.435324	0.374589	0.368711	0.393192	0.449334	0.460775	0.414028	0.388998	0.402351	0.662969	0.32881	7.00634e-06	0.370499	0.373498	0.44906	0.440119	0.415087	0.80028	0.430548	0.360372	0.383231	0.472325	0.412735	0.372761	0.445858	0.118546	0.398854	0.485013	0.294218
BRD-A48237631	mitomycin-c	71	0.307362	0.171819	0.853615	0.919853	0.8132	0.502885	0.663248	0.966531	0.977101	0.130231	0.95434	0.388468	0.0691824	0.508226	0.631912	0.784428	0.414233	0.430168	0.888486	0.933094	0.191462	0.835889	0.487434	0.333548	0.669403	0.305575	0.41008	0.0529446	0.561019	0.00095134	0.732387	0.493553	0.395643	0.629952	0.931109	0.873233	0.900167	0.127948	0.381339	0.499387	0.939221	0.352804	0.428502	0.0108626	0.844488	0.152098	0.0747755
BRD-K04949373	parthenolide	71	0.334666	0.640044	0.557114	0.539249	0.631813	0.518489	0.424725	0.97956	0.963461	0.339076	0.512905	0.473067	0.691988	0.667838	0.398686	0.614604	0.416489	0.454692	0.721718	0.442448	0.326148	0.493244	0.550683	0.361893	0.568155	0.4384	0.428242	0.242897	0.467567	4.08775e-06	0.491071	0.505059	0.463672	0.550285	0.574317	0.852245	0.492711	0.279194	0.386953	0.504559	0.568642	0.157049	0.464663	0.0870372	0.337897	0.390927	0.134856
BRD-A81772229	simvastatin	71	0.335487	0.719728	0.685765	0.585474	0.617882	0.607353	0.57011	0.91772	0.880302	0.484123	0.770928	0.558836	0.709489	0.719305	0.604152	0.619749	0.4106	0.414579	0.688472	0.488343	0.254003	0.502004	0.459741	0.249468	0.492152	0.410121	0.378808	0.165997	0.336275	0.0042071	0.337548	0.456945	0.404643	0.437652	0.584431	0.829236	0.522772	0.39274	0.491024	0.478057	0.476418	0.211309	0.417375	0.186405	0.645227	0.304605	0.135295
BRD-K98493452	honokiol	71	0.359863	0.577693	0.592051	0.485902	0.474968	0.506039	0.48281	0.895266	0.787166	0.371648	0.673806	0.431398	0.499242	0.546226	0.544483	0.620654	0.405557	0.429086	0.657399	0.386138	0.445546	0.42898	0.498285	0.411101	0.364827	0.418963	0.39887	0.433606	0.408308	0.00222765	0.394391	0.474201	0.452609	0.463276	0.421184	0.732645	0.47587	0.412483	0.401784	0.492171	0.474739	0.451623	0.47443	0.261	0.574164	0.464049	0.28486
BRD-K17016787	estriol	72	0.307852	0.62384	0.711468	0.320018	0.651115	0.631446	0.613955	0.914088	0.847685	0.263514	0.758177	0.571533	0.64686	0.652612	0.652243	0.639491	0.421277	0.397137	0.69731	0.590325	0.290035	0.614954	0.614077	0.417347	0.257777	0.558042	0.628628	0.494024	0.334843	0.000889247	0.588966	0.382653	0.252582	0.391696	0.295966	0.79483	0.36079	0.332849	0.611448	0.646951	0.336589	0.23153	0.309073	0.0786657	0.690689	0.558208	0.150194
BRD-K66989831	anacardic-acid	72	0.338646	0.363549	0.563618	0.494345	0.363997	0.437122	0.379177	0.813619	0.718778	0.356027	0.732165	0.499402	0.504073	0.411897	0.344851	0.431453	0.384346	0.56351	0.533396	0.489512	0.404416	0.448827	0.384928	0.302165	0.329648	0.441912	0.443068	0.409195	0.362037	6.86026e-09	0.368356	0.345355	0.45598	0.394034	0.463015	0.728605	0.45895	0.443141	0.320672	0.42162	0.506539	0.408548	0.406243	0.24828	0.631289	0.554133	0.530848
BRD-K03816923	rottlerin	72	0.348808	0.698267	0.662498	0.688879	0.568048	0.657535	0.576225	0.900386	0.885861	0.489341	0.770033	0.516393	0.679623	0.666488	0.467213	0.604182	0.406015	0.430139	0.706231	0.481173	0.359316	0.531262	0.546402	0.332824	0.46625	0.441364	0.418319	0.204666	0.455521	0.00482978	0.468256	0.540719	0.41162	0.488963	0.615167	0.816662	0.494842	0.410059	0.437235	0.51052	0.521479	0.30435	0.515817	0.190118	0.73109	0.255099	0.0826431
BRD-K43744935	tamoxifen	72	0.358563	0.610543	0.599218	0.513193	0.474414	0.514481	0.470033	0.905914	0.913473	0.518881	0.787083	0.402984	0.694933	0.65687	0.454321	0.566611	0.408586	0.417354	0.658592	0.399392	0.348993	0.414452	0.452904	0.389744	0.410116	0.433962	0.379971	0.703999	0.35881	0.00714965	0.398057	0.485017	0.419996	0.427867	0.484374	0.83516	0.433587	0.432367	0.451714	0.467543	0.41997	0.223021	0.344101	0.0646328	0.686541	0.461586	0.812621
BRD-K26664453	cytochalasin-b	73	0.346028	0.660501	0.771734	0.724518	0.664036	0.528819	0.622447	0.933667	0.930265	0.464709	0.88136	0.648235	0.674491	0.752011	0.586917	0.582875	0.427301	0.508445	0.729414	0.481551	0.39953	0.456677	0.506696	0.19608	0.510137	0.376153	0.429982	0.0665431	0.441337	0.000363614	0.393708	0.514362	0.377766	0.445688	0.627761	0.83401	0.597776	0.419056	0.390743	0.48397	0.495161	0.423617	0.484955	0.24917	0.840909	0.242817	0.101619
BRD-A19248578	latrunculin-b	73	0.346586	0.652868	0.704832	0.726417	0.710225	0.622612	0.577124	0.905972	0.920097	0.510854	0.773579	0.614257	0.732105	0.782788	0.551643	0.684298	0.413869	0.424458	0.744218	0.5536	0.352542	0.521668	0.544626	0.28889	0.505492	0.423388	0.38923	0.300087	0.45278	0.000263113	0.47386	0.534312	0.414351	0.475163	0.692971	0.832548	0.511536	0.398904	0.485261	0.503503	0.578755	0.433861	0.461325	0.202217	0.731006	0.254247	0.132105
BRD-K66206289	lobeline	73	0.35646	0.514497	0.555581	0.439036	0.420291	0.451009	0.436925	0.877935	0.814594	0.36659	0.660655	0.367438	0.445972	0.525958	0.505542	0.58046	0.405022	0.408284	0.585842	0.375489	0.431663	0.38692	0.450438	0.456165	0.358838	0.421673	0.403517	0.487448	0.373768	0.00396256	0.392834	0.452794	0.452058	0.431073	0.384216	0.697142	0.44483	0.392565	0.386104	0.46024	0.419495	0.407146	0.419397	0.176273	0.510684	0.553157	0.38184
BRD-K32744045	disulfiram	73	0.356658	0.680179	0.560779	0.533152	0.318056	0.453782	0.540683	0.938105	0.890819	0.399058	0.330642	0.546059	0.625695	0.512713	0.548004	0.709531	0.412723	0.44931	0.430892	0.423573	0.400547	0.445213	0.520273	0.48655	0.435079	0.500462	0.417327	0.260057	0.458647	0.000747836	0.452204	0.573116	0.465336	0.522305	0.490248	0.832672	0.44315	0.315786	0.45914	0.491477	0.499563	0.337818	0.459265	0.242909	0.369649	0.372706	0.16346
BRD-K94441233	mevastatin	74	0.354065	0.624904	0.601892	0.537323	0.537919	0.5481	0.492647	0.917613	0.890573	0.453026	0.699101	0.462272	0.685143	0.631591	0.50034	0.585648	0.406236	0.392281	0.602307	0.463464	0.347518	0.463194	0.464356	0.362148	0.454532	0.443557	0.403937	0.394339	0.361566	0.00472148	0.367181	0.500668	0.405979	0.466985	0.51273	0.843526	0.467715	0.419321	0.472529	0.457303	0.442826	0.256487	0.402241	0.145649	0.591312	0.381242	0.279108
BRD-A49160188	donepezil	74	0.357713	0.526249	0.543456	0.443548	0.456146	0.467977	0.449956	0.890558	0.859149	0.378962	0.659993	0.369013	0.57779	0.517133	0.477578	0.568672	0.407413	0.415558	0.627477	0.397163	0.456995	0.45003	0.457272	0.437106	0.361852	0.413686	0.382496	0.256421	0.431746	0.0118254	0.42576	0.439629	0.437152	0.413454	0.394097	0.707528	0.503649	0.403831	0.391725	0.461099	0.423684	0.579531	0.446412	0.112564	0.538189	0.478664	0.268368
BRD-K04046242	equilin	75	0.312253	0.673937	0.726938	0.322029	0.69366	0.665888	0.642159	0.913685	0.853778	0.39646	0.813883	0.610667	0.67625	0.663591	0.662396	0.66954	0.426072	0.413483	0.709575	0.625352	0.33009	0.647523	0.656473	0.443856	0.247435	0.614633	0.63743	0.49094	0.307394	0.000778874	0.6157	0.392736	0.238846	0.44187	0.27915	0.828358	0.352498	0.439731	0.647568	0.667427	0.412886	0.292952	0.273359	0.0458591	0.729825	0.595477	0.126
BRD-K81839095	estrone	75	0.324987	0.631404	0.704082	0.34945	0.626922	0.650948	0.622549	0.897718	0.852364	0.368424	0.827691	0.599904	0.682913	0.662557	0.614386	0.655358	0.417703	0.457912	0.695578	0.608707	0.355135	0.619094	0.626387	0.453669	0.268575	0.59125	0.607521	0.493997	0.326718	0.000779178	0.585597	0.377135	0.273518	0.449029	0.312287	0.773164	0.374543	0.42821	0.594524	0.633232	0.420145	0.344326	0.341227	0.0703744	0.751401	0.624118	0.211094
BRD-K04218075	clomifene	76	0.327157	0.661106	0.68451	0.423874	0.6013	0.611262	0.59835	0.933117	0.905287	0.338499	0.818257	0.525843	0.660382	0.693526	0.611609	0.642819	0.418813	0.379743	0.68894	0.536236	0.306173	0.561119	0.583917	0.385376	0.328801	0.566047	0.541045	0.516251	0.352748	0.00146454	0.524	0.476296	0.298914	0.450246	0.448917	0.847522	0.390635	0.339457	0.577791	0.59461	0.347338	0.181534	0.322602	0.0661772	0.739041	0.580002	0.242959
BRD-K77345217	gallic-acid	76	0.347336	0.438328	0.541283	0.506606	0.313805	0.461754	0.409634	0.837938	0.726278	0.390304	0.795903	0.514471	0.671545	0.508381	0.382284	0.499288	0.388502	0.569093	0.561954	0.513063	0.446714	0.468286	0.450504	0.25924	0.381453	0.440416	0.436682	0.458575	0.364665	3.73123e-09	0.35796	0.373545	0.441445	0.413696	0.478095	0.760122	0.472383	0.43576	0.338017	0.417506	0.509433	0.483372	0.405872	0.278272	0.754719	0.553692	0.493188
BRD-K98548675	parthenolide	77	0.347586	0.737132	0.74473	0.662086	0.692758	0.660538	0.683203	0.935767	0.9117	0.544382	0.664399	0.635226	0.713086	0.721996	0.642256	0.652272	0.422749	0.553547	0.689995	0.550666	0.368775	0.47589	0.477621	0.37751	0.568326	0.598872	0.411696	0.0909445	0.443786	0.000743539	0.430805	0.618124	0.489043	0.563232	0.619171	0.882489	0.489948	0.462581	0.45923	0.476761	0.590043	0.316275	0.452732	0.315621	0.593528	0.182359	0.0448355
BRD-K84955386	hyperoside	77	0.363267	0.608488	0.575753	0.472871	0.531127	0.538898	0.51087	0.900944	0.886623	0.37688	0.714576	0.400973	0.537079	0.595641	0.591896	0.721643	0.415065	0.418942	0.646391	0.396246	0.45003	0.439387	0.534608	0.417619	0.409861	0.421033	0.402717	0.410113	0.418835	0.00399409	0.431088	0.479527	0.438082	0.451517	0.400507	0.826563	0.477418	0.420697	0.422966	0.494512	0.480716	0.391343	0.426714	0.16974	0.616735	0.494807	0.366212
BRD-K50866992	tropisetron	77	0.370092	0.483372	0.491961	0.388731	0.422022	0.455595	0.402993	0.912565	0.820365	0.414317	0.466062	0.373058	0.573031	0.551652	0.49945	0.607827	0.408221	0.444956	0.642033	0.392385	0.43775	0.487974	0.449413	0.532502	0.407168	0.427923	0.412591	0.298211	0.446052	0.0491068	0.400799	0.43623	0.45478	0.393093	0.372112	0.78376	0.504742	0.446535	0.390486	0.471302	0.453089	0.430472	0.455624	0.171255	0.372495	0.518059	0.272418
BRD-A62326914	paroxetine	77	0.37225	0.516258	0.482738	0.533587	0.554121	0.460675	0.457342	0.929815	0.831292	0.575208	0.712558	0.433426	0.618937	0.57225	0.356776	0.493166	0.409517	0.426842	0.601007	0.40712	0.349476	0.422873	0.480347	0.3346	0.451812	0.443504	0.408693	0.260592	0.327238	0.146691	0.39501	0.450036	0.441449	0.496275	0.464239	0.821147	0.524382	0.501955	0.430585	0.465914	0.424765	0.310565	0.392467	0.273578	0.530928	0.574289	0.23669
BRD-K93754473	tamoxifen	78	0.3381	0.646599	0.668846	0.489439	0.600149	0.600799	0.587724	0.928775	0.899249	0.422928	0.846785	0.58185	0.722232	0.717083	0.538022	0.630775	0.416423	0.441747	0.685337	0.558292	0.318815	0.56269	0.595115	0.347334	0.353406	0.552418	0.547243	0.507964	0.33895	0.0204419	0.517515	0.44643	0.328145	0.483557	0.470164	0.854801	0.411486	0.387286	0.55361	0.583194	0.412917	0.2833	0.329194	0.157229	0.751685	0.586817	0.182277
BRD-K69608737	tacrolimus	78	0.368899	0.613104	0.618178	0.548298	0.492918	0.488845	0.51505	0.922911	0.906842	0.497437	0.797694	0.392038	0.600433	0.613865	0.476937	0.576012	0.40902	0.417474	0.622275	0.401484	0.458543	0.44042	0.454941	0.449925	0.403513	0.425693	0.405114	0.327765	0.444174	0.000693622	0.413789	0.497354	0.428464	0.48214	0.47553	0.723898	0.497226	0.430606	0.418401	0.46535	0.414583	0.40262	0.450369	0.166416	0.670647	0.429595	0.235584
BRD-K32403583	mevastatin	79	0.351495	0.628424	0.532288	0.497853	0.466676	0.524398	0.405539	0.970174	0.914553	0.344554	0.744192	0.541065	0.665826	0.635326	0.371911	0.598285	0.414178	0.410503	0.645604	0.45179	0.325951	0.471834	0.519318	0.312674	0.506416	0.393008	0.413743	0.373427	0.324358	1.45399e-06	0.379376	0.413299	0.38179	0.509789	0.61401	0.82211	0.512242	0.331773	0.452643	0.49675	0.479692	0.325142	0.430212	0.155126	0.541414	0.49735	0.130053
BRD-K48195008	ethinylestradiol	79	0.362483	0.580142	0.56718	0.431115	0.443773	0.485392	0.467523	0.909603	0.847866	0.386437	0.725389	0.391169	0.503462	0.591097	0.514043	0.647368	0.406034	0.424754	0.62405	0.380918	0.468944	0.402812	0.499425	0.449241	0.374097	0.438608	0.403759	0.426614	0.410064	0.00169628	0.389019	0.461325	0.450629	0.455516	0.393191	0.816191	0.45781	0.390399	0.419374	0.477871	0.450092	0.404273	0.434985	0.189821	0.578144	0.518541	0.311247
BRD-K10207760	lasalocid	80	0.344296	0.75892	0.674373	0.689852	0.592252	0.668987	0.618399	0.944047	0.926761	0.618841	0.837243	0.483648	0.753305	0.731872	0.509628	0.574697	0.411936	0.375029	0.674242	0.451801	0.363484	0.441343	0.532772	0.300704	0.482047	0.484026	0.391413	0.258906	0.403675	0.0269275	0.396195	0.623478	0.398093	0.54888	0.650898	0.916483	0.493412	0.500137	0.588885	0.481877	0.444842	0.163841	0.331531	0.0809605	0.804909	0.323858	0.112897
BRD-K63750851	mycophenolic-acid	81	0.272144	0.45701	0.616526	0.791243	0.721899	0.480549	0.385031	0.509209	0.628663	0.772685	0.655261	0.628315	0.305601	0.566088	0.489633	0.495414	0.368343	0.617286	0.610463	0.527965	0.300636	0.494763	0.542342	0.345453	0.529284	0.40461	0.290056	0.0066677	0.279197	9.78996e-07	0.530512	0.511858	0.635565	0.56834	0.701385	0.632944	0.737978	0.552247	0.363436	0.467985	0.906496	0.0849203	0.520481	0.0129635	0.667982	0.00967662	0.018034
BRD-K74133369	oligomycin-a	81	0.36545	0.602931	0.621441	0.769685	0.565677	0.694174	0.445191	0.932851	0.912856	0.493404	0.694633	0.544945	0.661926	0.690107	0.431979	0.637739	0.406281	0.407268	0.698005	0.45605	0.416416	0.611581	0.528949	0.374486	0.379515	0.423189	0.413346	0.374672	0.498032	0.0147973	0.534675	0.454864	0.385768	0.399754	0.651937	0.79787	0.508304	0.30457	0.368707	0.536826	0.474478	0.671739	0.649946	0.343228	0.624842	0.273924	0.0357879
BRD-A71390734	idarubicin	83	0.278651	0.117967	0.94138	0.977921	0.99355	0.0891014	0.694326	0.85729	0.955859	0.291779	0.973136	0.998946	0.0223242	0.972687	0.519589	0.265432	0.429669	0.92181	0.980912	0.937206	0.0621336	0.772691	0.235478	0.00285233	0.99198	0.0325092	0.111981	0.380215	0.509141	3.40699e-08	0.978732	0.251409	0.984839	0.347628	0.992945	0.921238	0.998245	0.120665	0.363415	0.996332	0.99999	0.513258	0.999964	0.00348712	0.971891	0.00585274	2.43175e-09
BRD-K37798499	etoposide	83	0.353309	0.241417	0.783111	0.846628	0.847464	0.501147	0.618703	0.948346	0.976392	0.220215	0.894404	0.726201	0.240444	0.789814	0.623115	0.780089	0.414756	0.490481	0.900434	0.823532	0.288031	0.762692	0.527465	0.420506	0.670562	0.403827	0.432043	0.197643	0.480004	0.00157278	0.589102	0.547151	0.482811	0.521757	0.820179	0.857292	0.756998	0.207007	0.349477	0.510418	0.836226	0.396593	0.49492	0.0773495	0.788409	0.30204	0.166742
BRD-K37890730	camptothecin	86	0.290871	0.300057	0.928556	0.964389	0.806382	0.53911	0.610099	0.95153	0.990117	0.205689	0.976932	0.76638	0.0900145	0.769484	0.61144	0.862001	0.429675	0.51599	0.924435	0.980548	0.245211	0.884204	0.529434	0.0781376	0.768098	0.172018	0.320139	0.0895164	0.57886	1.82917e-06	0.933032	0.468656	0.439107	0.715597	0.992989	0.958766	0.988257	0.313492	0.361685	0.708996	0.999585	0.516364	0.68203	0.0108835	0.851499	0.0548502	0.0409704
BRD-K41431477	A-23187	86	0.300343	0.868481	0.81509	0.92843	0.8754	0.947449	0.695108	0.960449	0.945451	0.555935	0.800707	0.788488	0.933296	0.880117	0.353867	0.661586	0.371385	0.424845	0.908464	0.802596	0.247911	0.626061	0.561375	0.289352	0.83713	0.674366	0.330611	0.144883	0.547568	0.000214796	0.711039	0.603616	0.503863	0.699513	0.918343	0.876899	0.451364	0.219544	0.452078	0.779833	0.668322	0.228312	0.817032	0.0853926	0.796591	0.0417264	9.23108e-05
BRD-K81651477	parthenolide	86	0.316043	0.856592	0.858135	0.619364	0.704126	0.75244	0.676135	0.927469	0.699747	0.0383142	0.558105	0.599039	0.820962	0.809544	0.63954	0.329798	0.394839	0.337509	0.806986	0.590995	0.19473	0.63424	0.300694	0.173156	0.651381	0.395242	0.329071	0.0467935	0.376755	7.87741e-08	0.236577	0.499128	0.437079	0.517933	0.585611	0.731678	0.542888	0.153741	0.312566	0.270952	0.571248	0.190871	0.371732	0.00287753	0.608215	0.137878	0.0202203
BRD-K36137799	plumbagin	86	0.35314	0.472223	0.734388	0.751998	0.474588	0.570147	0.481783	0.921406	0.931603	0.343967	0.899359	0.572219	0.753014	0.726906	0.580597	0.62486	0.417031	0.618044	0.74677	0.603751	0.418891	0.617357	0.488581	0.160254	0.56097	0.427834	0.458558	0.227075	0.459846	1.19744e-07	0.499019	0.453579	0.430985	0.449756	0.674786	0.934722	0.563799	0.366232	0.36079	0.457112	0.817839	0.474706	0.464614	0.245108	0.812694	0.465702	0.294331
BRD-A39996500	radicicol	87	0.324998	0.893731	0.737974	0.660756	0.593043	0.873214	0.687125	0.933759	0.908706	0.578669	0.58418	0.670822	0.848464	0.742121	0.354323	0.630081	0.412463	0.562002	0.583127	0.547282	0.132981	0.396889	0.489524	0.559275	0.423892	0.78149	0.433597	0.414159	0.375118	3.04788e-05	0.325271	0.573473	0.578494	0.663929	0.677872	0.922517	0.149158	0.403713	0.64946	0.620454	0.562703	0.505328	0.488357	0.490764	0.452884	0.0566299	0.0128861
BRD-K45330754	diethylstilbestrol	87	0.339273	0.676137	0.740524	0.365783	0.677445	0.681387	0.665447	0.914123	0.881445	0.481373	0.786296	0.628588	0.694128	0.688055	0.68411	0.688379	0.42732	0.438122	0.721659	0.654974	0.436536	0.666131	0.667533	0.528631	0.315232	0.628755	0.671493	0.563966	0.396351	0.000758955	0.645595	0.434607	0.234213	0.520686	0.302457	0.772672	0.388893	0.479937	0.657937	0.688511	0.453503	0.420966	0.339987	0.0923731	0.734085	0.655272	0.124946
BRD-K44495371	reserpine	87	0.360721	0.531415	0.523712	0.480149	0.33103	0.445992	0.424276	0.90296	0.900598	0.378456	0.594709	0.351271	0.772328	0.563747	0.443849	0.570281	0.423404	0.41637	0.597153	0.399155	0.432426	0.467932	0.517847	0.423402	0.457216	0.409742	0.434414	0.520693	0.468377	3.78222e-06	0.423323	0.430263	0.432368	0.419056	0.460326	0.691942	0.45214	0.32031	0.394981	0.478012	0.423178	0.401241	0.441861	0.302234	0.50592	0.546227	0.409167
BRD-K17113870	lovastatin	88	0.355018	0.742211	0.617304	0.581944	0.568435	0.560889	0.452163	0.971383	0.912355	0.335401	0.81717	0.588959	0.753694	0.716694	0.421341	0.690212	0.416708	0.39685	0.803426	0.476208	0.314794	0.509902	0.557109	0.336075	0.537074	0.409779	0.428083	0.452989	0.282397	1.04126e-06	0.39385	0.423331	0.404191	0.578901	0.673623	0.883383	0.535948	0.329238	0.442078	0.545767	0.497374	0.131025	0.447504	0.102355	0.645562	0.478516	0.181417
BRD-K33583600	isoliquiritigenin	88	0.362419	0.752459	0.793744	0.667043	0.607775	0.594226	0.672168	0.936796	0.911975	0.479002	0.72144	0.631558	0.71643	0.751361	0.616246	0.629837	0.422638	0.550664	0.665152	0.494759	0.429284	0.459348	0.495224	0.34844	0.520285	0.530678	0.426602	0.114955	0.481747	0.00046719	0.434292	0.571355	0.432685	0.540371	0.622088	0.886929	0.538514	0.479759	0.434423	0.478402	0.538831	0.339428	0.522642	0.36149	0.700896	0.22118	0.043034
BRD-K73991644	isoquercetin	88	0.372569	0.620964	0.608807	0.496738	0.454158	0.541643	0.487515	0.917674	0.825694	0.471697	0.639303	0.4898	0.533171	0.601801	0.566025	0.652202	0.406808	0.441961	0.651514	0.411936	0.426179	0.426584	0.501939	0.426402	0.479141	0.465767	0.409551	0.536304	0.409574	0.00970942	0.401288	0.521029	0.445256	0.490789	0.496262	0.687854	0.473706	0.471218	0.506874	0.504947	0.459862	0.332611	0.460503	0.166077	0.553109	0.504443	0.368514
BRD-K28026280	simvastatin	89	0.36308	0.585609	0.548609	0.576149	0.410687	0.526972	0.531857	0.968909	0.926953	0.366513	0.736279	0.490039	0.712024	0.72099	0.428974	0.665786	0.423197	0.405192	0.727397	0.43505	0.409783	0.458757	0.55841	0.307365	0.489176	0.414871	0.428836	0.435433	0.432352	2.16015e-06	0.421008	0.427795	0.440253	0.46216	0.600874	0.805691	0.503164	0.368438	0.423752	0.48563	0.463206	0.248782	0.45302	0.252556	0.662059	0.569778	0.268433
BRD-K95808480	taxifolin	89	0.368241	0.621508	0.503135	0.51268	0.607151	0.577968	0.539256	0.909516	0.882345	0.418939	0.649995	0.44804	0.520463	0.606208	0.576377	0.684375	0.412417	0.44528	0.664029	0.462642	0.381028	0.498948	0.462476	0.508189	0.42405	0.432398	0.39349	0.476465	0.404082	0.113624	0.496793	0.483806	0.456162	0.460473	0.416178	0.810998	0.51651	0.42482	0.461836	0.528464	0.527869	0.391602	0.413134	0.1881	0.586863	0.527655	0.307003
BRD-A56798952	bafilomycin	91	0.356886	0.650561	0.624827	0.580469	0.370981	0.541831	0.478104	0.901264	0.816884	0.597487	0.844077	0.502786	0.777324	0.654124	0.342114	0.516726	0.393923	0.50555	0.578027	0.541714	0.403253	0.459126	0.476827	0.210833	0.477363	0.482765	0.442158	0.463926	0.435136	1.24827e-07	0.331312	0.457857	0.427828	0.462581	0.621087	0.833112	0.471199	0.566844	0.438352	0.434876	0.569462	0.281738	0.360123	0.177109	0.815846	0.545082	0.27566
BRD-K95921201	reserpine	91	0.369029	0.724339	0.666318	0.628324	0.544997	0.634166	0.555831	0.94414	0.944974	0.551936	0.825636	0.50634	0.774942	0.765485	0.493077	0.655368	0.410817	0.381571	0.669314	0.414832	0.409686	0.460507	0.505731	0.382784	0.445238	0.493235	0.392843	0.448647	0.442264	0.00138988	0.387449	0.564952	0.405136	0.508517	0.626712	0.894711	0.442991	0.509723	0.565483	0.487614	0.43305	0.259058	0.392255	0.0897725	0.756343	0.418841	0.258703
BRD-A72711497	lasalocid	92	0.366434	0.824913	0.716389	0.69267	0.579812	0.646637	0.636116	0.940227	0.951077	0.71	0.802844	0.593744	0.817236	0.794495	0.574593	0.61837	0.409527	0.418792	0.703475	0.51185	0.247769	0.448844	0.542519	0.26673	0.610535	0.535397	0.392043	0.309604	0.395982	0.0242441	0.384903	0.605784	0.384209	0.549676	0.691871	0.942323	0.514244	0.620883	0.61977	0.540422	0.450264	0.177033	0.351642	0.142998	0.744874	0.373059	0.11186
BRD-A48570745	ivermectin	93	0.372729	0.664628	0.653871	0.718716	0.539601	0.658514	0.539562	0.937303	0.949775	0.461619	0.819665	0.431992	0.778294	0.695494	0.47162	0.619845	0.415747	0.389678	0.703896	0.429315	0.46011	0.555355	0.536345	0.412443	0.437264	0.42179	0.413587	0.249372	0.452496	0.0013627	0.511196	0.520929	0.382932	0.483754	0.641822	0.859366	0.545385	0.355075	0.431716	0.50441	0.414852	0.499287	0.650479	0.21683	0.772391	0.292985	0.119729
BRD-K84036904	testosterone	93	0.380952	0.661317	0.521316	0.481168	0.515362	0.580619	0.490903	0.936765	0.880567	0.530648	0.6352	0.466718	0.568664	0.586132	0.576271	0.662012	0.409015	0.448409	0.662538	0.403108	0.405108	0.427749	0.480679	0.512747	0.434347	0.460333	0.403406	0.436086	0.38036	0.155968	0.449256	0.51831	0.46217	0.427862	0.40253	0.850966	0.515017	0.503189	0.452231	0.501339	0.456669	0.485463	0.380857	0.17967	0.515929	0.524433	0.324307
BRD-K31542390	mycophenolic-acid	94	0.348944	0.402951	0.660564	0.763315	0.723131	0.442264	0.489867	0.813853	0.873633	0.519265	0.838409	0.532747	0.282605	0.647383	0.514118	0.5959	0.402018	0.551953	0.780093	0.602763	0.425445	0.558212	0.514837	0.422123	0.542042	0.409295	0.397996	0.104047	0.400141	0.00220136	0.590164	0.520463	0.513784	0.526132	0.703216	0.725227	0.705184	0.443932	0.376485	0.50734	0.723955	0.289909	0.525141	0.0633081	0.751454	0.236611	0.0977145
BRD-A67709388	antimycin-a	94	0.369094	0.698655	0.559466	0.640186	0.523898	0.620401	0.48333	0.980219	0.930001	0.431013	0.844819	0.485145	0.712047	0.657528	0.36898	0.607213	0.418842	0.425252	0.783805	0.429247	0.444617	0.552418	0.578975	0.363978	0.511516	0.399554	0.430863	0.268663	0.476402	2.09528e-07	0.459747	0.482423	0.41112	0.523684	0.646314	0.811674	0.526068	0.372213	0.41179	0.543734	0.479214	0.375322	0.490226	0.128062	0.703766	0.469812	0.0738566
BRD-A23689620	avermectin	97	0.371719	0.670704	0.569348	0.713583	0.49265	0.534605	0.455111	0.984072	0.964963	0.459526	0.716074	0.472851	0.734382	0.701899	0.37725	0.65243	0.418297	0.415281	0.796352	0.439571	0.411934	0.551629	0.529904	0.37634	0.50532	0.403777	0.461663	0.500272	0.460648	9.4556e-07	0.543057	0.436152	0.3814	0.50195	0.646748	0.899255	0.520336	0.292675	0.368679	0.568252	0.434145	0.404206	0.508795	0.211916	0.521973	0.375182	0.0480501
BRD-A83326220	brazilin	98	0.374893	0.73424	0.662367	0.647814	0.600348	0.680014	0.639524	0.92614	0.926149	0.464239	0.693856	0.498406	0.710167	0.673436	0.55023	0.659272	0.411651	0.452582	0.7065	0.511409	0.440399	0.587027	0.51163	0.503629	0.468152	0.533628	0.413261	0.282872	0.495168	0.000824375	0.536745	0.600991	0.461089	0.564877	0.602726	0.812068	0.498411	0.315921	0.449124	0.491273	0.502822	0.526551	0.602104	0.30954	0.593593	0.320898	0.112005
BRD-A74907996	equol	99	0.339382	0.999824	0.997308	0.190897	0.999487	0.998157	0.975494	0.994334	0.997089	0.520741	0.996534	0.999575	0.999837	0.999632	0.967916	0.998644	0.448082	0.470744	0.999163	0.96269	0.275208	0.997773	0.998828	0.563106	0.18247	0.954343	0.999983	0.983763	0.248092	3.69244e-07	0.998878	0.350473	0.0201534	0.54274	0.167431	0.987327	0.251394	0.517386	0.98699	0.999837	0.477474	0.49085	0.215422	0.0383873	0.997219	0.983617	9.73342e-06
BRD-K63343048	orlistat	101	0.383473	0.745478	0.622872	0.53872	0.556692	0.62936	0.566453	0.94426	0.928721	0.581754	0.754719	0.551233	0.57355	0.759814	0.553009	0.710367	0.409328	0.399644	0.769706	0.392774	0.400964	0.422539	0.497625	0.415971	0.498436	0.519981	0.408491	0.469007	0.374557	0.00692282	0.380608	0.502818	0.463155	0.4891	0.503286	0.891027	0.454042	0.499283	0.542322	0.48156	0.477313	0.304002	0.399468	0.105305	0.67853	0.506879	0.268261
BRD-A63989068	apicidin	102	0.35002	0.626256	0.831559	0.837203	0.767805	0.508263	0.774575	0.959146	0.935768	0.443417	0.936276	0.62772	0.884444	0.724452	0.605405	0.646497	0.395203	0.619473	0.856212	0.772225	0.327421	0.698948	0.421162	0.363299	0.508788	0.412935	0.429049	0.212153	0.438358	1.36801e-09	0.554172	0.582418	0.507017	0.459846	0.676972	0.953241	0.532376	0.471891	0.487368	0.535428	0.882773	0.407235	0.323312	0.0631771	0.930738	0.448782	0.413678
BRD-A38030642	cyclosporin-a	102	0.387234	0.795255	0.791166	0.78011	0.646014	0.713288	0.663493	0.960238	0.943309	0.650628	0.886269	0.683855	0.84793	0.792307	0.551542	0.657882	0.42227	0.505881	0.716792	0.54733	0.43902	0.550628	0.565243	0.312383	0.56513	0.492064	0.44335	0.146238	0.496175	0.0007033	0.50065	0.597953	0.37461	0.534388	0.712006	0.926006	0.602289	0.562623	0.485121	0.583025	0.482309	0.498263	0.691006	0.44345	0.861573	0.245808	0.0815842
BRD-A60070924	alpha-estradiol	103	0.334104	0.791207	0.876198	0.486427	0.843101	0.858763	0.769532	0.885223	0.801767	0.759656	0.898324	0.696408	0.781232	0.668239	0.538126	0.660564	0.421717	0.594828	0.816164	0.685417	0.306403	0.579115	0.687031	0.591188	0.483162	0.835785	0.623079	0.829691	0.186378	4.01304e-05	0.495689	0.46615	0.244099	0.701661	0.367486	0.862072	0.22977	0.802264	0.661615	0.570212	0.507759	0.663591	0.128594	0.239277	0.843483	0.499688	0.000175976
BRD-K03222093	cyclosporin-a	103	0.378887	0.759906	0.533148	0.680184	0.47488	0.650349	0.507505	0.986138	0.967645	0.532006	0.784733	0.56447	0.807936	0.733654	0.339429	0.622989	0.410829	0.46283	0.710033	0.450904	0.358466	0.561674	0.56471	0.374552	0.517305	0.440962	0.458278	0.615487	0.437356	6.98293e-07	0.508415	0.404704	0.431844	0.537506	0.702582	0.879151	0.546578	0.497171	0.440915	0.600876	0.467679	0.368257	0.510885	0.124255	0.677147	0.482421	0.25439
BRD-K51485625	ritonavir	103	0.392249	0.676076	0.588454	0.503715	0.482941	0.551602	0.476955	0.924149	0.889595	0.538178	0.690995	0.484695	0.593365	0.617445	0.505777	0.652103	0.402739	0.432847	0.603837	0.395914	0.440788	0.406072	0.46796	0.486092	0.398278	0.480373	0.410695	0.665508	0.401844	0.0269373	0.394451	0.497105	0.464215	0.472357	0.438099	0.836883	0.460127	0.465532	0.441182	0.494479	0.431173	0.471893	0.434542	0.275188	0.580974	0.54137	0.423669
BRD-A84228258	brefeldin-a	104	0.357899	0.802477	0.727059	0.861046	0.615285	0.713421	0.644373	0.961337	0.953949	0.375975	0.886777	0.417117	0.879854	0.694408	0.421087	0.681912	0.390026	0.756697	0.809077	0.773597	0.440102	0.715975	0.617353	0.300792	0.481697	0.418271	0.458919	0.186621	0.605391	2.21087e-09	0.623683	0.499818	0.408137	0.494925	0.808732	0.891497	0.587002	0.380982	0.353218	0.58246	0.666709	0.413727	0.642863	0.231981	0.871882	0.276201	0.161287
BRD-K74117820	nelfinavir	106	0.387855	0.722249	0.624374	0.598296	0.578727	0.645177	0.521771	0.932742	0.92267	0.430686	0.759702	0.534772	0.697009	0.651915	0.483938	0.757486	0.406882	0.40825	0.720624	0.420173	0.450108	0.545635	0.581797	0.43853	0.470679	0.422953	0.420913	0.447331	0.488705	0.0178028	0.516105	0.505062	0.42536	0.504303	0.533044	0.784523	0.485777	0.371533	0.441972	0.521657	0.449106	0.568666	0.504801	0.27539	0.672632	0.470728	0.193975
BRD-K10466330	AVA	107	0.358598	0.999757	0.997113	0.333342	0.999455	0.999232	0.977348	0.981808	0.998371	0.551315	0.997657	0.999823	0.999977	0.999101	0.97027	0.998981	0.451445	0.439023	0.997535	0.987678	0.416647	0.998373	0.999031	0.479739	0.28321	0.859614	0.999956	0.917901	0.470787	7.07754e-07	0.99955	0.425192	0.0902258	0.594715	0.321589	0.980948	0.563227	0.521495	0.995383	0.999791	0.554302	0.396218	0.563136	0.0235561	0.99654	0.883849	6.77611e-06
BRD-A17065207	brefeldin-a	107	0.375248	0.861863	0.766541	0.914093	0.792572	0.866701	0.694455	0.978528	0.979378	0.604273	0.90431	0.52426	0.831459	0.782557	0.496526	0.764823	0.404403	0.585229	0.793149	0.790862	0.477362	0.769565	0.614635	0.368505	0.50056	0.42253	0.463219	0.150286	0.609849	0.0142272	0.771948	0.647584	0.377599	0.525385	0.847405	0.942443	0.648662	0.347225	0.419341	0.729282	0.642658	0.503695	0.848176	0.460836	0.851614	0.173499	0.0230332
BRD-K99369265	sirolimus	107	0.376893	0.575218	0.613606	0.706757	0.616586	0.604326	0.428435	0.873559	0.890405	0.561668	0.644169	0.596699	0.708316	0.652474	0.465056	0.659374	0.40594	0.636982	0.745929	0.473449	0.500231	0.511769	0.595909	0.230627	0.450562	0.508503	0.501025	0.176099	0.448463	0.000862515	0.535855	0.510632	0.354361	0.498182	0.615296	0.688523	0.594269	0.425069	0.391331	0.42004	0.493183	0.377416	0.724292	0.610849	0.60896	0.244984	0.0703786
BRD-A64290322	cyclosporin-a	107	0.386309	0.759293	0.766308	0.805802	0.765284	0.778481	0.674888	0.967126	0.960525	0.632691	0.88557	0.702656	0.860767	0.783914	0.530245	0.662261	0.41738	0.4321	0.7433	0.658698	0.479145	0.695932	0.573068	0.348324	0.606778	0.493567	0.418993	0.575533	0.515688	0.0143551	0.638865	0.64959	0.415375	0.605387	0.778124	0.932631	0.644	0.45423	0.559091	0.572564	0.559451	0.344309	0.695968	0.602494	0.81923	0.228822	0.126787
BRD-A69815203	cyclosporin-a	107	0.393005	0.756731	0.655223	0.688991	0.595038	0.702927	0.591843	0.955914	0.937052	0.608381	0.829688	0.503638	0.750315	0.734914	0.495212	0.646817	0.40712	0.44572	0.596158	0.461287	0.448311	0.518272	0.53764	0.42713	0.474818	0.521865	0.428683	0.4643	0.485538	0.00736491	0.479193	0.582411	0.417655	0.533528	0.62599	0.869215	0.532894	0.537753	0.543082	0.521735	0.416433	0.477836	0.577555	0.33231	0.749516	0.377571	0.178157
BRD-A19037878	trichostatin-a	108	0.366981	0.892003	0.913487	0.917212	0.864455	0.834334	0.876437	0.973145	0.964843	0.807098	0.936969	0.853611	0.825018	0.931203	0.76818	0.836687	0.417766	0.530936	0.874646	0.866523	0.210419	0.794319	0.594897	0.327755	0.751768	0.475205	0.408222	0.395168	0.564308	0.00223754	0.736191	0.759244	0.718302	0.650683	0.913833	0.960843	0.683675	0.576293	0.837053	0.780451	0.933923	0.500757	0.586907	0.078508	0.872181	0.13374	0.07787
BRD-K51730347	diphencyprone	109	0.38694	0.739539	0.662491	0.591756	0.607167	0.670137	0.590095	0.921271	0.916918	0.477508	0.628011	0.574486	0.635943	0.714076	0.576947	0.740587	0.407921	0.461871	0.706849	0.48752	0.465918	0.52708	0.531341	0.561296	0.479042	0.554102	0.422485	0.474641	0.492128	0.000971864	0.509155	0.583768	0.505207	0.585923	0.500157	0.865174	0.460951	0.380943	0.4446	0.530071	0.555753	0.458204	0.519863	0.345829	0.516819	0.377071	0.09581
BRD-K68202742	trichostatin-a	110	0.375751	0.829199	0.90151	0.921383	0.891061	0.787127	0.840228	0.976627	0.970991	0.753525	0.950569	0.844967	0.843063	0.891969	0.721112	0.784076	0.41255	0.586769	0.91701	0.890026	0.246614	0.785741	0.556369	0.335015	0.710517	0.447039	0.39827	0.350856	0.557373	0.000741019	0.751445	0.708259	0.690831	0.608407	0.872464	0.975955	0.725537	0.574665	0.697645	0.775785	0.952909	0.622398	0.564089	0.0706543	0.922656	0.238443	0.129637
BRD-A08003242	rhodomyrtoxin-b	111	0.390028	0.898352	0.825858	0.863233	0.775531	0.841919	0.766992	0.976067	0.975759	0.745293	0.895947	0.744109	0.903624	0.903512	0.638578	0.760192	0.414438	0.395422	0.837893	0.635693	0.279922	0.615778	0.679214	0.221319	0.707656	0.540489	0.44654	0.222923	0.496028	0.00536885	0.558626	0.684967	0.336144	0.595179	0.837376	0.966296	0.594413	0.602263	0.639194	0.620097	0.534051	0.386481	0.578953	0.257635	0.860734	0.228828	0.0544793
BRD-K44094599	tacrolimus	111	0.404491	0.683597	0.597357	0.45644	0.48851	0.541968	0.463868	0.94323	0.891401	0.56378	0.620429	0.470289	0.640702	0.625014	0.516569	0.69061	0.404079	0.446399	0.734125	0.41657	0.477971	0.508639	0.49649	0.484115	0.45976	0.470718	0.404317	0.42742	0.485901	0.015255	0.487571	0.481443	0.438656	0.462886	0.420122	0.868097	0.529181	0.52492	0.418913	0.504923	0.473903	0.615194	0.484538	0.431807	0.479762	0.524607	0.37509
BRD-K11528507	geldanamycin	116	0.379871	0.838442	0.729384	0.741299	0.434833	0.712942	0.654237	0.976646	0.968622	0.706483	0.904929	0.67476	0.927678	0.79773	0.483358	0.675994	0.411514	0.747784	0.777734	0.689002	0.51724	0.562319	0.605474	0.347974	0.658478	0.59241	0.434876	0.231858	0.485527	3.18257e-08	0.386665	0.626607	0.43479	0.566896	0.78302	0.923694	0.476069	0.557265	0.486463	0.493704	0.589019	0.604573	0.527915	0.572495	0.834555	0.253899	0.202735
BRD-A24396574	celastrol	117	0.353888	0.859498	0.773923	0.874903	0.552087	0.818056	0.563377	0.934006	0.963594	0.699504	0.657194	0.500968	0.938684	0.776128	0.52818	0.833656	0.426528	0.430944	0.862349	0.77134	0.381805	0.738131	0.709357	0.214741	0.660958	0.676906	0.230638	0.114993	0.743261	0.000228205	0.872506	0.774962	0.156548	0.695551	0.83735	0.8429	0.56943	0.189621	0.419144	0.851171	0.511116	0.94884	0.808682	0.620055	0.587284	0.140855	0.0001722
BRD-K89626439	sirolimus	117	0.400241	0.663368	0.674148	0.783018	0.67568	0.684622	0.507471	0.902408	0.913313	0.568274	0.762353	0.695111	0.802068	0.734398	0.467684	0.682179	0.410839	0.675628	0.728151	0.571439	0.552285	0.582848	0.640556	0.251912	0.492395	0.555996	0.495808	0.174547	0.484027	0.0105116	0.554836	0.5519	0.361087	0.553395	0.724895	0.80109	0.611064	0.536854	0.427636	0.457086	0.49531	0.339989	0.765929	0.696178	0.725425	0.257411	0.0589703
BRD-A20697603	thiostrepton	118	0.379987	0.865004	0.812746	0.798375	0.724386	0.86601	0.757022	0.966177	0.963507	0.697192	0.790673	0.776414	0.905963	0.804719	0.584909	0.807923	0.41415	0.512513	0.83705	0.723763	0.352124	0.632052	0.536851	0.601583	0.623096	0.724504	0.367067	0.165037	0.60633	0.0108799	0.660608	0.703859	0.655823	0.660436	0.782494	0.945171	0.460081	0.328264	0.551716	0.68635	0.820515	0.75224	0.559096	0.560232	0.712247	0.221958	0.0355562
BRD-K36007650	puromycin	118	0.381257	0.698352	0.671802	0.740916	0.657087	0.729439	0.605702	0.921922	0.893556	0.622065	0.733116	0.672423	0.750944	0.715244	0.486264	0.655377	0.40665	0.549869	0.727991	0.674572	0.433897	0.655088	0.491135	0.583496	0.595815	0.629764	0.404221	0.158932	0.523144	0.0104829	0.663498	0.633309	0.520252	0.571305	0.68332	0.837476	0.500144	0.3849	0.448	0.596405	0.608784	0.594431	0.709057	0.442952	0.686908	0.161287	0.0547752
BRD-K43389675	daunorubicin	119	0.364309	0.653001	0.902389	0.868974	0.858186	0.484571	0.714063	0.913782	0.954951	0.70039	0.903823	0.839948	0.748515	0.937635	0.637105	0.718775	0.434234	0.590004	0.967295	0.745104	0.487177	0.704777	0.824307	0.0611305	0.797276	0.1394	0.36242	0.608459	0.807162	7.99573e-07	0.85888	0.603261	0.710747	0.706248	0.852844	0.895105	0.944653	0.612413	0.493705	0.895057	0.939083	0.736066	0.914351	0.107281	0.941767	0.0439235	0.0257084
BRD-K69650333	idarubicin	119	0.37124	0.49967	0.877462	0.880127	0.838805	0.419318	0.653217	0.935706	0.967676	0.515188	0.885542	0.89958	0.466644	0.946237	0.681256	0.680551	0.432923	0.538478	0.958114	0.761403	0.361785	0.707471	0.834545	0.105318	0.855387	0.184713	0.340086	0.513583	0.724142	2.92577e-06	0.883272	0.525284	0.695681	0.687684	0.8485	0.938311	0.941009	0.396309	0.451708	0.960279	0.966131	0.789191	0.9754	0.162948	0.910586	0.0717439	0.105534
BRD-K37991163	paroxetine	119	0.409864	0.771436	0.671895	0.664983	0.577939	0.680994	0.608695	0.959545	0.93942	0.656067	0.827644	0.609315	0.791491	0.793875	0.550463	0.713062	0.414898	0.471768	0.774819	0.469795	0.46505	0.484068	0.605381	0.380442	0.573523	0.561627	0.434668	0.49196	0.460288	0.00696115	0.448574	0.617336	0.421228	0.593124	0.637422	0.916369	0.538632	0.604969	0.612549	0.495076	0.46834	0.334098	0.479408	0.237537	0.746256	0.486375	0.396965
BRD-A79768653	sirolimus	120	0.401622	0.787383	0.740173	0.813661	0.774379	0.74608	0.601285	0.888212	0.733191	0.508264	0.652153	0.842112	0.589779	0.835323	0.507035	0.701218	0.413911	0.861774	0.815968	0.659235	0.613335	0.60367	0.587972	0.196003	0.663139	0.776841	0.682287	0.143377	0.370202	0.00167622	0.692046	0.576992	0.228494	0.673019	0.810708	0.822824	0.715899	0.886253	0.432801	0.389228	0.39273	0.22953	0.878781	0.876633	0.660277	0.16812	0.0621951
BRD-K85853281	BRD-K85853281	121	0.372679	0.535126	0.841604	0.899303	0.855088	0.43745	0.600142	0.87782	0.938689	0.710415	0.86692	0.910876	0.634606	0.886221	0.630172	0.715303	0.431631	0.577765	0.930815	0.797172	0.418139	0.646182	0.801933	0.0874942	0.807812	0.152377	0.355724	0.529153	0.745047	0.00190537	0.837455	0.535377	0.668718	0.721969	0.874468	0.897018	0.944508	0.495473	0.426905	0.940432	0.964822	0.855679	0.972018	0.116584	0.883208	0.0628674	0.0295346
BRD-K24132293	piperlongumine	121	0.393719	0.888712	0.812951	0.792712	0.720801	0.759513	0.773752	0.964159	0.953871	0.775357	0.816727	0.74296	0.844313	0.791689	0.681093	0.759089	0.420713	0.595447	0.814805	0.706592	0.395001	0.619877	0.520721	0.558989	0.678143	0.665726	0.400502	0.0802668	0.590488	0.000967249	0.625692	0.718796	0.66153	0.675571	0.745495	0.944025	0.505161	0.478521	0.601743	0.668064	0.696991	0.664932	0.691251	0.402979	0.76401	0.171769	0.0220873
BRD-K24652731	ivermectin	121	0.399163	0.81797	0.593497	0.776469	0.489337	0.708347	0.669992	0.991566	0.989012	0.54694	0.903685	0.418543	0.88495	0.801346	0.457962	0.698404	0.431029	0.435143	0.849617	0.486101	0.430153	0.633301	0.659415	0.320265	0.578599	0.431796	0.503976	0.256603	0.554741	2.35349e-07	0.631585	0.571492	0.363737	0.548537	0.745717	0.911427	0.620409	0.426249	0.461426	0.581963	0.467163	0.283567	0.583029	0.151575	0.725015	0.31379	0.0806951
BRD-A19134330	A-23187	122	0.382753	0.780018	0.761319	0.780544	0.54038	0.68496	0.625641	0.951112	0.955192	0.479683	0.878628	0.435999	0.898545	0.792437	0.492955	0.625507	0.427071	0.654129	0.835863	0.668064	0.477768	0.631962	0.585595	0.300327	0.708417	0.478635	0.476738	0.477484	0.503669	1.14232e-08	0.511093	0.59408	0.417546	0.583642	0.739873	0.934018	0.486287	0.38243	0.443409	0.613481	0.539119	0.304969	0.640882	0.419306	0.809078	0.546151	0.380128
BRD-A68009927	daunorubicin	123	0.379057	0.594717	0.871886	0.915484	0.907837	0.487657	0.662284	0.901404	0.967877	0.756154	0.93388	0.912918	0.74208	0.920446	0.604865	0.678034	0.432239	0.667206	0.936396	0.829801	0.518471	0.706681	0.804677	0.078998	0.867634	0.153298	0.319741	0.657472	0.778576	7.53937e-05	0.864764	0.574559	0.755767	0.742817	0.892961	0.927371	0.951215	0.668754	0.489309	0.924116	0.948902	0.820574	0.956359	0.158059	0.942203	0.0656548	0.0469431
BRD-A52627843	thiostrepton	123	0.386071	0.870432	0.73838	0.754707	0.62416	0.847765	0.774903	0.991068	0.965494	0.740538	0.776928	0.77145	0.878914	0.795026	0.547601	0.760991	0.402939	0.656601	0.857576	0.69675	0.278966	0.608089	0.563943	0.724689	0.706601	0.734894	0.412705	0.205369	0.641866	1.9041e-07	0.682276	0.724474	0.739114	0.738502	0.775991	0.96066	0.349628	0.272663	0.600223	0.780585	0.754776	0.741757	0.467881	0.518602	0.599282	0.231521	0.0926918
BRD-K87343924	wortmannin	124	0.402322	0.769085	0.734391	0.753546	0.78834	0.66984	0.729218	0.959685	0.95609	0.509149	0.839208	0.665751	0.788234	0.807087	0.656972	0.736397	0.414352	0.600856	0.799926	0.51774	0.539234	0.543866	0.661186	0.274388	0.593321	0.572079	0.511407	0.260433	0.4415	1.63395e-05	0.54785	0.658566	0.401841	0.604182	0.693299	0.854555	0.599887	0.552657	0.521817	0.44156	0.480123	0.229487	0.588719	0.385917	0.792955	0.296815	0.148878
BRD-K17953061	staurosporine	126	0.374457	0.642436	0.830932	0.902226	0.867609	0.66155	0.726014	0.950809	0.985673	0.620755	0.934757	0.875255	0.786837	0.877283	0.649053	0.735621	0.444934	0.603434	0.948124	0.851596	0.600622	0.778341	0.823687	0.0873302	0.871397	0.212112	0.545671	0.434669	0.764057	1.09501e-06	0.839517	0.523672	0.49811	0.700815	0.873045	0.945074	0.919478	0.625315	0.546862	0.838528	0.966796	0.753686	0.904952	0.216309	0.93547	0.130776	0.00840834
BRD-K91966436	daunorubicin	127	0.371836	0.548054	0.823317	0.888711	0.830038	0.383307	0.581684	0.945729	0.956181	0.597807	0.881318	0.874202	0.518695	0.871631	0.497798	0.632592	0.425385	0.521595	0.962603	0.709344	0.295248	0.661495	0.760912	0.108305	0.856974	0.171508	0.362393	0.632765	0.742303	1.94303e-07	0.848728	0.43289	0.683107	0.681164	0.85374	0.923945	0.897158	0.507762	0.424745	0.930521	0.926777	0.79822	0.910338	0.0929498	0.932669	0.138156	0.146042
BRD-K05350981	oligomycin-c	127	0.41605	0.842768	0.687237	0.642215	0.576571	0.739877	0.62324	0.964184	0.937235	0.630147	0.785961	0.590923	0.763956	0.799365	0.545455	0.771724	0.410321	0.427632	0.687271	0.443653	0.49141	0.515863	0.583319	0.463424	0.485692	0.527523	0.425927	0.612647	0.491714	0.0111375	0.469172	0.574295	0.441349	0.565149	0.577882	0.913863	0.507001	0.540187	0.540045	0.574864	0.489982	0.604302	0.520382	0.411513	0.652543	0.503275	0.312009
BRD-K33551950	radicicol	129	0.406848	0.88706	0.802767	0.857392	0.702512	0.840019	0.72467	0.970535	0.9805	0.719705	0.821452	0.77212	0.908573	0.857568	0.558476	0.83239	0.41	0.558385	0.818107	0.746905	0.394179	0.693025	0.645789	0.565644	0.60264	0.736854	0.407301	0.229583	0.621684	0.000815452	0.748406	0.776763	0.594915	0.710147	0.819315	0.954414	0.439619	0.388075	0.596314	0.694878	0.786222	0.704103	0.753983	0.740038	0.720557	0.129958	0.000981705
BRD-A50287119	sirolimus	130	0.409736	0.542845	0.616423	0.679445	0.413535	0.539326	0.454147	0.913261	0.871196	0.578928	0.816266	0.625015	0.786694	0.644717	0.369687	0.563396	0.392854	0.750346	0.60625	0.603776	0.518511	0.519076	0.541068	0.246573	0.55324	0.480689	0.534334	0.304448	0.438354	1.20505e-08	0.439435	0.426839	0.430915	0.475554	0.644628	0.84395	0.553969	0.611503	0.359397	0.427154	0.57754	0.50173	0.574999	0.4382	0.7805	0.510432	0.332122
BRD-K64517075	heliomycin	131	0.407657	0.886341	0.771047	0.894813	0.765672	0.858011	0.748387	0.988563	0.986106	0.806971	0.952182	0.668762	0.910385	0.876093	0.479975	0.756276	0.420276	0.355493	0.883746	0.649346	0.341354	0.624106	0.634656	0.34289	0.733992	0.555129	0.450931	0.16671	0.507067	0.0981067	0.617387	0.706141	0.497863	0.679191	0.869717	0.965547	0.570326	0.501481	0.608559	0.622819	0.544176	0.529373	0.534748	0.355758	0.913011	0.309777	0.0192346
BRD-K92093830	doxorubicin	133	0.407088	0.670931	0.881527	0.928739	0.918982	0.576267	0.718475	0.955063	0.970614	0.829213	0.95816	0.9328	0.810224	0.936221	0.679639	0.784557	0.431665	0.576706	0.964151	0.865079	0.403403	0.789083	0.780234	0.136762	0.87794	0.229194	0.387805	0.905285	0.811625	0.000499182	0.886885	0.67545	0.814904	0.823927	0.921352	0.941346	0.952965	0.801739	0.544523	0.882769	0.958867	0.895382	0.9427	0.0376245	0.938878	0.111189	0.0718493
BRD-K84937637	sirolimus	134	0.411719	0.803555	0.788229	0.817263	0.789679	0.818168	0.671046	0.948178	0.95522	0.720951	0.869549	0.785352	0.90666	0.848219	0.613829	0.775924	0.421855	0.596388	0.856778	0.706722	0.626946	0.714133	0.746441	0.305501	0.610977	0.647065	0.613165	0.157166	0.577723	0.000611867	0.740918	0.675847	0.279338	0.674059	0.751773	0.891295	0.63931	0.681377	0.581199	0.62359	0.618331	0.342673	0.792427	0.869552	0.81668	0.371542	0.0237605
BRD-K39484304	triptolide	135	0.40318	0.706916	0.887476	0.950896	0.909874	0.626031	0.772365	0.929136	0.986047	0.764599	0.958976	0.985459	0.809091	0.969138	0.705257	0.763076	0.433173	0.639333	0.972868	0.869881	0.568906	0.843175	0.911845	0.0666811	0.901383	0.135194	0.352271	0.848727	0.842244	1.92498e-06	0.937159	0.627921	0.80188	0.793075	0.909748	0.96767	0.950409	0.68393	0.523395	0.940232	0.97519	0.900941	0.977759	0.0952537	0.970164	0.0409623	0.0129606
BRD-A76941896	doxorubicin	135	0.41094	0.857638	0.907554	0.920429	0.942723	0.663395	0.752725	0.943634	0.982929	0.93796	0.955662	0.968202	0.945464	0.966749	0.778802	0.801859	0.442297	0.673813	0.954728	0.890123	0.682059	0.80262	0.909838	0.0621391	0.855364	0.151474	0.374	0.930367	0.89759	4.88509e-07	0.948368	0.687661	0.805929	0.892939	0.920159	0.943983	0.982624	0.904341	0.628904	0.95107	0.984215	0.848225	0.988579	0.0929835	0.966797	0.0139903	0.0102081
BRD-A56518012	epirubicin	135	0.411347	0.596325	0.84655	0.933735	0.754464	0.596237	0.685477	0.924095	0.973139	0.665226	0.943964	0.95435	0.959163	0.870667	0.550533	0.721154	0.422266	0.758548	0.925311	0.840046	0.720462	0.712123	0.825138	0.0485345	0.862972	0.280165	0.458827	0.752161	0.782997	6.23997e-11	0.796327	0.522165	0.568062	0.73829	0.93642	0.966697	0.909817	0.76582	0.418872	0.729764	0.992259	0.752502	0.906159	0.360912	0.961005	0.0713322	0.0588122
BRD-K04548931	pidorubicine	135	0.414483	0.725811	0.9143	0.943038	0.884452	0.594049	0.740645	0.953595	0.977272	0.851234	0.960554	0.94111	0.849808	0.95139	0.671623	0.816192	0.43463	0.641667	0.965372	0.890552	0.505161	0.856631	0.862808	0.113202	0.886629	0.209793	0.381564	0.802912	0.845361	8.03351e-06	0.924443	0.671536	0.791403	0.849286	0.936088	0.947175	0.969111	0.78022	0.60444	0.937586	0.97869	0.851247	0.972902	0.112345	0.950203	0.0603557	0.0797631
BRD-K72723676	benzethonium	137	0.407845	0.844061	0.705145	0.771294	0.626466	0.840407	0.641204	0.992868	0.96872	0.641423	0.833965	0.561269	0.843544	0.835041	0.419303	0.792821	0.412998	0.442751	0.895236	0.548753	0.432146	0.669546	0.722169	0.318531	0.691333	0.500908	0.595069	0.281278	0.531076	5.00051e-07	0.616982	0.634526	0.297824	0.63707	0.798059	0.954521	0.573854	0.559909	0.638974	0.700529	0.536197	0.301963	0.540263	0.419494	0.784852	0.425459	0.115196
BRD-A52530684	doxorubicin	137	0.42507	0.830162	0.92919	0.964603	0.949361	0.711541	0.824981	0.97155	0.984658	0.923048	0.968159	0.959084	0.93897	0.972563	0.756916	0.826967	0.449911	0.612798	0.98624	0.927128	0.772201	0.865609	0.910201	0.0616502	0.928535	0.168962	0.555641	0.935211	0.904093	6.49445e-07	0.94499	0.739574	0.753601	0.899862	0.955051	0.967586	0.984641	0.910673	0.722814	0.955405	0.988922	0.967806	0.977711	0.0476328	0.974311	0.0514896	0.0203995
[truncated: 275 more columns]
